# Supplementary material
Source: publisher figshare collection journal article supplement (https://acs.figshare.com/ndownloader/files/4045654)
Supplement: Supplementary file 1 [file 4045654]

 
data_pn-3n_a_shelxl
 
_audit_creation_method            SHELXL-2012
_chemical_name_systematic
;
 ?
;
_chemical_name_common             ?
_chemical_melting_point           ?
_chemical_formula_moiety          ?
_chemical_formula_sum
 'C288 H200 B6.67 Cl1.33 F26.67 N16 O16 Pd4' 
_chemical_formula_weight          5192.23

loop_
 _atom_type_symbol
 _atom_type_description
 _atom_type_scat_dispersion_real
 _atom_type_scat_dispersion_imag
 _atom_type_scat_source
 'C'  'C'   0.0033   0.0016
 'International Tables Vol C Tables 4.2.6.8 and 6.1.1.4'
 'H'  'H'   0.0000   0.0000
 'International Tables Vol C Tables 4.2.6.8 and 6.1.1.4'
 'B'  'B'   0.0013   0.0007
 'International Tables Vol C Tables 4.2.6.8 and 6.1.1.4'
 'N'  'N'   0.0061   0.0033
 'International Tables Vol C Tables 4.2.6.8 and 6.1.1.4'
 'O'  'O'   0.0106   0.0060
 'International Tables Vol C Tables 4.2.6.8 and 6.1.1.4'
 'F'  'F'   0.0171   0.0103
 'International Tables Vol C Tables 4.2.6.8 and 6.1.1.4'
 'Cl'  'Cl'   0.1484   0.1585
 'International Tables Vol C Tables 4.2.6.8 and 6.1.1.4'
 'Pd'  'Pd'  -0.9988   1.0072
 'International Tables Vol C Tables 4.2.6.8 and 6.1.1.4'
 
_space_group_crystal_system       cubic
_space_group_IT_number            222
_space_group_name_H-M_alt         'P n -3 n'
_space_group_name_Hall            '-P 4a 2bc 3'
 
_shelx_space_group_comment
;
The symmetry employed for this shelxl refinement is uniquely defined
by the following loop, which should always be used as a source of
symmetry information in preference to the above space-group names.
They are only intended as comments.
;
 
loop_
 _space_group_symop_operation_xyz
 'x, y, z'
 '-x+1/2, -y+1/2, z'
 '-x+1/2, y, -z+1/2'
 'x, -y+1/2, -z+1/2'
 'z, x, y'
 'z, -x+1/2, -y+1/2'
 '-z+1/2, -x+1/2, y'
 '-z+1/2, x, -y+1/2'
 'y, z, x'
 '-y+1/2, z, -x+1/2'
 'y, -z+1/2, -x+1/2'
 '-y+1/2, -z+1/2, x'
 'y, x, -z+1/2'
 '-y+1/2, -x+1/2, -z+1/2'
 'y, -x+1/2, z'
 '-y+1/2, x, z'
 'x, z, -y+1/2'
 '-x+1/2, z, y'
 '-x+1/2, -z+1/2, -y+1/2'
 'x, -z+1/2, y'
 'z, y, -x+1/2'
 'z, -y+1/2, x'
 '-z+1/2, y, x'
 '-z+1/2, -y+1/2, -x+1/2'
 '-x, -y, -z'
 'x-1/2, y-1/2, -z'
 'x-1/2, -y, z-1/2'
 '-x, y-1/2, z-1/2'
 '-z, -x, -y'
 '-z, x-1/2, y-1/2'
 'z-1/2, x-1/2, -y'
 'z-1/2, -x, y-1/2'
 '-y, -z, -x'
 'y-1/2, -z, x-1/2'
 '-y, z-1/2, x-1/2'
 'y-1/2, z-1/2, -x'
 '-y, -x, z-1/2'
 'y-1/2, x-1/2, z-1/2'
 '-y, x-1/2, -z'
 'y-1/2, -x, -z'
 '-x, -z, y-1/2'
 'x-1/2, -z, -y'
 'x-1/2, z-1/2, y-1/2'
 '-x, z-1/2, -y'
 '-z, -y, x-1/2'
 '-z, y-1/2, -x'
 'z-1/2, -y, -x'
 'z-1/2, y-1/2, x-1/2'
 
_cell_length_a                    39.030(2)
_cell_length_b                    39.030(2)
_cell_length_c                    39.030(2)
_cell_angle_alpha                 90
_cell_angle_beta                  90
_cell_angle_gamma                 90
_cell_volume                      59456(9)
_cell_formula_units_Z             6
_cell_measurement_temperature     100(2)
_cell_measurement_reflns_used     ? 
_cell_measurement_theta_min       ? 
_cell_measurement_theta_max       ? 
 
_exptl_crystal_description        ? 
_exptl_crystal_colour             ? 
_exptl_crystal_density_meas       ? 
_exptl_crystal_density_method     ?              
_exptl_crystal_density_diffrn     0.870          
_exptl_crystal_F_000              15888
_exptl_transmission_factor_min    ?                                             
_exptl_transmission_factor_max    ?                                             
_exptl_crystal_size_max           0.200
_exptl_crystal_size_mid           0.200
_exptl_crystal_size_min           0.080
_exptl_absorpt_coefficient_mu     0.243
_shelx_estimated_absorpt_T_min    0.953
_shelx_estimated_absorpt_T_max    0.981
_exptl_absorpt_correction_type    ? 
_exptl_absorpt_correction_T_min   ? 
_exptl_absorpt_correction_T_max   ? 
_exptl_absorpt_process_details    ? 
 
_exptl_special_details
;
 ?
;
 
_diffrn_ambient_temperature       100(2)
_diffrn_radiation_wavelength      0.71073
_diffrn_radiation_type            MoK\a
_diffrn_source                    ?                       
_diffrn_measurement_device_type   ? 
_diffrn_measurement_method        ? 
_diffrn_detector_area_resol_mean  ? 
_diffrn_reflns_number             270514
_diffrn_reflns_av_unetI/netI      0.0080
_diffrn_reflns_av_R_equivalents   0.0550
_diffrn_reflns_limit_h_min        -32
_diffrn_reflns_limit_h_max        32
_diffrn_reflns_limit_k_min        -32
_diffrn_reflns_limit_k_max        32
_diffrn_reflns_limit_l_min        -32
_diffrn_reflns_limit_l_max        32
_diffrn_reflns_theta_min          1.043
_diffrn_reflns_theta_max          17.260
_diffrn_reflns_theta_full         25.242
_diffrn_measured_fraction_theta_max   0.999
_diffrn_measured_fraction_theta_full  0.339
_diffrn_reflns_Laue_measured_fraction_max    0.999
_diffrn_reflns_Laue_measured_fraction_full   0.339
_diffrn_reflns_point_group_measured_fraction_max   0.999
_diffrn_reflns_point_group_measured_fraction_full  0.339
_reflns_number_total              3048
_reflns_number_gt                 2713
_reflns_threshold_expression      'I > 2\s(I)'
_reflns_Friedel_coverage          0.000
_reflns_Friedel_fraction_max      .
_reflns_Friedel_fraction_full     .
 
_reflns_special_details
;
 Reflections were merged by SHELXL according to the crystal
 class for the calculation of statistics and refinement.
 
 _reflns_Friedel_fraction is defined as the number of unique
 Friedel pairs measured divided by the number that would be
 possible theoretically, ignoring centric projections and
 systematic absences.
;
 
_computing_data_collection        ?
_computing_cell_refinement        ?
_computing_data_reduction         ?
_computing_structure_solution     ?
_computing_structure_refinement   'SHELXL-2012 (Sheldrick, 2012)'
_computing_molecular_graphics     ?
_computing_publication_material   ?
 
_refine_special_details
;
 ?
;
loop_
  _platon_squeeze_void_nr
  _platon_squeeze_void_average_x
  _platon_squeeze_void_average_y
  _platon_squeeze_void_average_z
  _platon_squeeze_void_volume
  _platon_squeeze_void_count_electrons
  _platon_squeeze_void_content
   1 -0.006 -0.012 -0.007     25268      7094 ' '
_platon_squeeze_details
;
;
_refine_ls_structure_factor_coef  Fsqd
_refine_ls_matrix_type            full
_refine_ls_weighting_scheme       calc
_refine_ls_weighting_details
;
 w=1/[\s^2^(Fo^2^)+(0.1000P)^2^]
 where P=(Fo^2^+2Fc^2^)/3
;
_atom_sites_solution_primary      ?
_atom_sites_solution_secondary    ?
_atom_sites_solution_hydrogens    geom
_refine_ls_hydrogen_treatment     constr
_refine_ls_extinction_method      none
_refine_ls_extinction_coef        .
_refine_ls_number_reflns          3048
_refine_ls_number_parameters      418
_refine_ls_number_restraints      1564
_refine_ls_R_factor_all           0.2266
_refine_ls_R_factor_gt            0.2212
_refine_ls_wR_factor_ref          0.5471
_refine_ls_wR_factor_gt           0.5388
_refine_ls_goodness_of_fit_ref    5.460
_refine_ls_restrained_S_all       4.596
_refine_ls_shift/su_max           0.028
_refine_ls_shift/su_mean          0.002
 
loop_
 _atom_site_label
 _atom_site_type_symbol
 _atom_site_fract_x
 _atom_site_fract_y
 _atom_site_fract_z
 _atom_site_U_iso_or_equiv
 _atom_site_adp_type
 _atom_site_occupancy
 _atom_site_site_symmetry_order  
 _atom_site_calc_flag
 _atom_site_refinement_flags_posn
 _atom_site_refinement_flags_adp
 _atom_site_refinement_flags_occupancy
 _atom_site_disorder_assembly
 _atom_site_disorder_group
Cl1 Cl 0.2500 0.7500 0.2500 0.066(4) Uani 1 8 d S T P . .
Cl2 Cl 0.2500 0.355(5) 0.2500 0.22(6) Uani 0.1667 4 d S TU P . .
Pd1 Pd 0.2500 0.44470(12) 0.2500 0.129(2) Uani 1 4 d DS TU P . .
Pd2 Pd 0.2500 0.83003(8) 0.2500 0.0677(19) Uani 1 4 d DS TU P . .
N2 N 0.2888(3) 0.8289(3) 0.2839(3) 0.066(4) Uani 1 1 d D U . . .
O1 O 0.3799(3) 0.6326(3) 0.2476(3) 0.095(4) Uani 1 1 d D U . . .
O2 O 0.4690(5) 0.6267(5) 0.1160(5) 0.168(6) Uani 1 1 d D U . . .
N1 N 0.2906(4) 0.4439(5) 0.2820(5) 0.146(7) Uani 1 1 d D U . . .
C1 C 0.2968(6) 0.4153(6) 0.3017(6) 0.174(10) Uani 1 1 d D U . . .
H1 H 0.2812 0.3967 0.3011 0.208 Uiso 1 1 calc R U . . .
C2 C 0.3254(5) 0.4134(6) 0.3221(6) 0.180(10) Uani 1 1 d D U . . .
H2 H 0.3294 0.3938 0.3360 0.216 Uiso 1 1 calc R U . . .
C3 C 0.3479(6) 0.4403(5) 0.3221(6) 0.170(9) Uani 1 1 d D U . . .
H3 H 0.3675 0.4396 0.3365 0.204 Uiso 1 1 calc R U . . .
C4 C 0.3426(5) 0.4684(5) 0.3014(6) 0.140(7) Uani 1 1 d D U . . .
C5 C 0.3135(5) 0.4704(5) 0.2819(6) 0.135(7) Uani 1 1 d D U . . .
H5 H 0.3092 0.4901 0.2682 0.162 Uiso 1 1 calc R U . . .
C6 C 0.3670(6) 0.4967(6) 0.3028(7) 0.146(8) Uani 1 1 d D U . . .
C7 C 0.3858(6) 0.5203(6) 0.2989(7) 0.141(8) Uani 1 1 d D U . . .
C8 C 0.4107(4) 0.5471(4) 0.2992(5) 0.126(6) Uani 1 1 d D U . . .
C9 C 0.4038(4) 0.5757(4) 0.2802(4) 0.113(6) Uani 1 1 d D U . . .
H9 H 0.3822 0.5777 0.2692 0.135 Uiso 1 1 calc R U . . .
C10 C 0.4274(4) 0.6019(4) 0.2764(4) 0.107(5) Uani 1 1 d D U . . .
C11 C 0.4582(4) 0.5992(4) 0.2936(5) 0.116(6) Uani 1 1 d D U . . .
C12 C 0.4656(5) 0.5695(5) 0.3116(6) 0.130(7) Uani 1 1 d D U . . .
H12 H 0.4873 0.5673 0.3225 0.156 Uiso 1 1 calc R U . . .
C13 C 0.4424(4) 0.5430(5) 0.3142(6) 0.137(7) Uani 1 1 d D U . . .
H13 H 0.4481 0.5225 0.3259 0.164 Uiso 1 1 calc R U . . .
C14 C 0.4883(4) 0.6249(5) 0.2937(6) 0.116(6) Uani 1 1 d D U . . .
H14A H 0.4889 0.6357 0.3167 0.139 Uiso 1 1 calc R U . . .
H14B H 0.5097 0.6116 0.2913 0.139 Uiso 1 1 calc R U . . .
C15 C 0.4891(4) 0.6521(5) 0.2685(6) 0.111(6) Uani 1 1 d D U . . .
H15A H 0.4874 0.6420 0.2452 0.133 Uiso 1 1 calc R U . . .
H15B H 0.5112 0.6644 0.2701 0.133 Uiso 1 1 calc R U . . .
C16 C 0.4412(3) 0.7327(4) 0.2934(4) 0.095(5) Uani 1 1 d D U . . .
H16 H 0.4468 0.7547 0.3022 0.115 Uiso 1 1 calc R U . . .
C17 C 0.4670(4) 0.7095(4) 0.2863(4) 0.108(6) Uani 1 1 d D U . . .
H17 H 0.4902 0.7158 0.2902 0.130 Uiso 1 1 calc R U . . .
C18 C 0.4596(3) 0.6778(4) 0.2737(5) 0.100(5) Uani 1 1 d D U . . .
C19 C 0.4255(4) 0.6688(4) 0.2682(5) 0.096(5) Uani 1 1 d D U . . .
C20 C 0.3997(4) 0.6917(4) 0.2753(4) 0.088(5) Uani 1 1 d D U . . .
H20 H 0.3765 0.6854 0.2716 0.106 Uiso 1 1 calc R U . . .
C21 C 0.4075(3) 0.7241(4) 0.2877(4) 0.079(5) Uani 1 1 d D U . . .
C22 C 0.3817(4) 0.7491(4) 0.2935(5) 0.077(5) Uani 1 1 d D U . . .
C23 C 0.3619(4) 0.7711(4) 0.3011(4) 0.072(5) Uani 1 1 d D U . . .
C24 C 0.3115(3) 0.8026(3) 0.2824(3) 0.063(4) Uani 1 1 d D U . . .
H24 H 0.3089 0.7857 0.2650 0.076 Uiso 1 1 calc R U . . .
C25 C 0.3381(3) 0.7998(4) 0.3052(3) 0.074(4) Uani 1 1 d D U . . .
C26 C 0.3421(4) 0.8240(4) 0.3306(4) 0.085(5) Uani 1 1 d D U . . .
H26 H 0.3603 0.8223 0.3467 0.102 Uiso 1 1 calc R U . . .
C27 C 0.3193(4) 0.8507(4) 0.3322(4) 0.084(5) Uani 1 1 d D U . . .
H27 H 0.3218 0.8677 0.3494 0.101 Uiso 1 1 calc R U . . .
C28 C 0.2929(4) 0.8530(4) 0.3090(4) 0.075(5) Uani 1 1 d D U . . .
H28 H 0.2772 0.8716 0.3104 0.090 Uiso 1 1 calc R U . . .
C29 C 0.4169(5) 0.6326(3) 0.2518(5) 0.093(4) Uani 1 1 d D U . . .
C30 C 0.4319(4) 0.6294(4) 0.2169(5) 0.107(5) Uani 1 1 d D U . . .
C31 C 0.4473(4) 0.6007(5) 0.2045(4) 0.128(7) Uani 1 1 d D U . . .
H31 H 0.4492 0.5811 0.2188 0.154 Uiso 1 1 calc R U . . .
C32 C 0.4602(5) 0.5993(5) 0.1717(5) 0.146(7) Uani 1 1 d D U . . .
H32 H 0.4714 0.5791 0.1639 0.176 Uiso 1 1 calc R U . . .
C33 C 0.4570(6) 0.6268(5) 0.1501(5) 0.140(7) Uani 1 1 d D U . . .
C34 C 0.4412(5) 0.6562(5) 0.1618(4) 0.126(6) Uani 1 1 d D U . . .
H34 H 0.4381 0.6755 0.1472 0.151 Uiso 1 1 calc R U . . .
C35 C 0.4300(5) 0.6569(5) 0.1950(4) 0.105(5) Uani 1 1 d D U . . .
H35 H 0.4203 0.6775 0.2034 0.126 Uiso 1 1 calc R U . . .
C36 C 0.4871(9) 0.5963(9) 0.1024(8) 0.197(12) Uani 1 1 d . U . . .
H36A H 0.4713 0.5768 0.1018 0.295 Uiso 1 1 calc R U . . .
H36B H 0.5066 0.5908 0.1173 0.295 Uiso 1 1 calc R U . . .
H36C H 0.4954 0.6011 0.0792 0.295 Uiso 1 1 calc R U . . .
B1 B 0.2832(10) 0.5622(10) 0.3258(10) 0.185(10) Uiso 0.5 1 d D U P . .
F1 F 0.269(2) 0.5905(15) 0.339(2) 0.185(10) Uiso 0.140(14) 1 d D U P A 1
F2 F 0.265(2) 0.549(2) 0.2986(17) 0.185(10) Uiso 0.140(14) 1 d D U P A 1
F3 F 0.3168(11) 0.564(2) 0.319(2) 0.185(10) Uiso 0.140(14) 1 d D U P A 1
F4 F 0.291(2) 0.5375(18) 0.3489(19) 0.185(10) Uiso 0.140(14) 1 d D U P A 1
F1' F 0.2937(11) 0.5806(11) 0.3523(10) 0.185(10) Uiso 0.360(14) 1 d D U P A 2
F2' F 0.2529(9) 0.5773(12) 0.3133(12) 0.185(10) Uiso 0.360(14) 1 d D U P A 2
F3' F 0.3032(11) 0.5585(12) 0.2986(10) 0.185(10) Uiso 0.360(14) 1 d D U P A 2
F4' F 0.2799(11) 0.5283(8) 0.3278(12) 0.185(10) Uiso 0.360(14) 1 d D U P A 2
B2 B 0.3956(13) 0.3880(12) 0.4038(14) 0.217(14) Uiso 0.3333 1 d D U P B -1
F5 F 0.3890(16) 0.4035(13) 0.4333(15) 0.217(14) Uiso 0.3333 1 d D U P B -1
F6 F 0.4041(14) 0.3539(10) 0.4094(15) 0.217(14) Uiso 0.3333 1 d D U P B -1
F7 F 0.3715(16) 0.3876(17) 0.380(2) 0.217(14) Uiso 0.3333 1 d D U P B -1
F8 F 0.4160(17) 0.4038(13) 0.3811(16) 0.217(14) Uiso 0.3333 1 d D U P B -1
 
loop_
 _atom_site_aniso_label
 _atom_site_aniso_U_11
 _atom_site_aniso_U_22
 _atom_site_aniso_U_33
 _atom_site_aniso_U_23
 _atom_site_aniso_U_13
 _atom_site_aniso_U_12
Cl1 0.062(5) 0.075(9) 0.062(5) 0.000 0.000 0.000
Cl2 0.15(5) 0.38(16) 0.15(5) 0.000 0.000 0.000
Pd1 0.128(3) 0.130(4) 0.128(3) 0.000 0.000 0.000
Pd2 0.061(2) 0.081(3) 0.061(2) 0.000 0.000 0.000
N2 0.060(7) 0.079(8) 0.059(7) 0.003(5) 0.004(5) -0.006(5)
O1 0.058(6) 0.107(9) 0.121(10) 0.017(6) 0.003(5) 0.008(6)
O2 0.165(14) 0.197(14) 0.142(10) -0.024(9) 0.031(9) -0.014(11)
N1 0.137(10) 0.144(13) 0.158(13) 0.033(10) -0.020(9) -0.029(8)
C1 0.167(15) 0.151(14) 0.202(19) 0.054(12) -0.059(14) -0.046(11)
C2 0.173(16) 0.159(14) 0.207(19) 0.061(13) -0.064(14) -0.050(11)
C3 0.160(14) 0.150(14) 0.199(18) 0.056(12) -0.055(13) -0.039(10)
C4 0.126(11) 0.137(12) 0.158(15) 0.031(10) -0.021(10) -0.017(9)
C5 0.123(11) 0.130(13) 0.151(15) 0.027(11) -0.014(10) -0.016(9)
C6 0.122(13) 0.137(12) 0.180(18) 0.034(11) -0.024(12) -0.015(9)
C7 0.116(12) 0.140(12) 0.168(17) 0.027(11) -0.023(12) -0.015(9)
C8 0.101(10) 0.124(10) 0.154(14) 0.024(9) -0.021(9) -0.003(8)
C9 0.081(10) 0.118(10) 0.140(14) 0.013(9) -0.005(9) 0.004(7)
C10 0.072(8) 0.114(9) 0.135(11) 0.011(7) -0.003(7) 0.009(6)
C11 0.078(9) 0.120(10) 0.151(13) 0.015(9) -0.014(8) 0.008(7)
C12 0.096(11) 0.128(11) 0.165(15) 0.023(10) -0.024(10) 0.005(8)
C13 0.108(11) 0.131(11) 0.171(16) 0.022(11) -0.029(10) -0.001(8)
C14 0.075(9) 0.117(10) 0.155(14) 0.006(9) -0.001(9) 0.012(7)
C15 0.074(9) 0.113(10) 0.145(14) -0.001(9) 0.004(9) 0.013(7)
C16 0.058(7) 0.106(9) 0.122(13) -0.001(9) -0.003(8) -0.005(6)
C17 0.059(8) 0.113(9) 0.153(15) -0.007(9) 0.000(8) 0.000(6)
C18 0.060(7) 0.107(9) 0.133(13) 0.002(8) 0.001(7) 0.003(6)
C19 0.061(7) 0.103(8) 0.125(11) 0.004(7) 0.005(7) 0.004(5)
C20 0.054(8) 0.095(8) 0.115(13) 0.003(8) -0.002(8) -0.001(6)
C21 0.056(7) 0.091(8) 0.089(11) 0.009(7) 0.001(7) -0.002(6)
C22 0.056(8) 0.088(9) 0.087(12) 0.003(8) -0.005(8) -0.006(6)
C23 0.057(8) 0.083(9) 0.076(11) 0.002(7) -0.003(7) -0.011(6)
C24 0.054(8) 0.068(8) 0.068(9) 0.003(7) 0.001(6) -0.013(6)
C25 0.059(8) 0.088(9) 0.075(9) 0.000(7) -0.004(6) -0.011(6)
C26 0.086(10) 0.092(10) 0.076(9) -0.003(7) -0.014(7) -0.006(7)
C27 0.089(10) 0.094(10) 0.069(9) -0.006(8) -0.016(7) -0.001(7)
C28 0.083(9) 0.077(9) 0.064(9) 0.000(7) -0.008(6) -0.006(7)
C29 0.055(7) 0.105(8) 0.120(8) 0.002(6) 0.004(6) 0.007(6)
C30 0.072(10) 0.127(10) 0.123(8) -0.003(7) 0.009(7) 0.005(8)
C31 0.111(14) 0.139(11) 0.133(11) -0.007(8) 0.017(9) 0.023(9)
C32 0.139(16) 0.161(13) 0.140(11) -0.017(9) 0.030(10) 0.008(11)
C33 0.128(14) 0.158(13) 0.134(10) -0.017(9) 0.018(9) -0.009(10)
C34 0.106(13) 0.152(12) 0.119(10) -0.010(8) 0.008(9) -0.016(10)
C35 0.072(11) 0.126(11) 0.117(10) -0.007(8) -0.001(8) -0.006(9)
C36 0.21(3) 0.212(19) 0.17(2) -0.035(16) 0.050(19) 0.007(17)
 
_geom_special_details
;
 All esds (except the esd in the dihedral angle between two l.s. planes)
 are estimated using the full covariance matrix.  The cell esds are taken
 into account individually in the estimation of esds in distances, angles
 and torsion angles; correlations between esds in cell parameters are only
 used when they are defined by crystal symmetry.  An approximate (isotropic)
 treatment of cell esds is used for estimating esds involving l.s. planes.
;
 
loop_
 _geom_bond_atom_site_label_1
 _geom_bond_atom_site_label_2
 _geom_bond_distance
 _geom_bond_site_symmetry_2
 _geom_bond_publ_flag
Pd1 N1 2.017(14) 3 ?
Pd1 N1 2.017(14) 23 ?
Pd1 N1 2.017(14) 21 ?
Pd1 N1 2.018(14) . ?
Pd2 N2 2.013(11) . ?
Pd2 N2 2.014(11) 3 ?
Pd2 N2 2.014(11) 23 ?
Pd2 N2 2.014(11) 21 ?
N2 C24 1.359(12) . ?
N2 C28 1.365(12) . ?
O1 C29 1.45(2) . ?
O2 C33 1.41(2) . ?
O2 C36 1.48(3) . ?
N1 C5 1.367(13) . ?
N1 C1 1.374(13) . ?
C1 C2 1.373(14) . ?
C2 C3 1.369(14) . ?
C3 C4 1.379(13) . ?
C4 C5 1.369(13) . ?
C4 C6 1.46(2) . ?
C6 C7 1.19(2) . ?
C7 C8 1.42(2) . ?
C8 C9 1.368(13) . ?
C8 C13 1.380(13) . ?
C9 C10 1.383(13) . ?
C10 C11 1.381(12) . ?
C10 C29 1.589(17) . ?
C11 C12 1.386(13) . ?
C11 C14 1.543(19) . ?
C12 C13 1.379(13) . ?
C14 C15 1.45(3) . ?
C15 C18 1.541(19) . ?
C16 C21 1.376(12) . ?
C16 C17 1.383(13) . ?
C17 C18 1.363(12) . ?
C18 C19 1.391(12) . ?
C19 C20 1.377(12) . ?
C19 C29 1.587(17) . ?
C20 C21 1.387(12) . ?
C21 C22 1.421(19) . ?
C22 C23 1.194(18) . ?
C23 C25 1.46(2) . ?
C24 C25 1.373(12) . ?
C25 C26 1.380(12) . ?
C26 C27 1.372(13) . ?
C27 C28 1.378(12) . ?
C29 C30 1.49(2) . ?
C30 C31 1.362(13) . ?
C30 C35 1.372(13) . ?
C31 C32 1.378(13) . ?
C32 C33 1.370(14) . ?
C33 C34 1.381(13) . ?
C34 C35 1.368(13) . ?
B1 F3' 1.32(3) . ?
B1 F1' 1.32(3) . ?
B1 F1 1.33(2) . ?
B1 F4' 1.33(3) . ?
B1 F3 1.34(2) . ?
B1 F4 1.35(2) . ?
B1 F2 1.38(2) . ?
B1 F2' 1.41(3) . ?
B2 F5 1.32(3) . ?
B2 F7 1.33(3) . ?
B2 F8 1.34(3) . ?
B2 F6 1.39(3) . ?
 
loop_
 _geom_angle_atom_site_label_1
 _geom_angle_atom_site_label_2
 _geom_angle_atom_site_label_3
 _geom_angle
 _geom_angle_site_symmetry_1
 _geom_angle_site_symmetry_3
 _geom_angle_publ_flag
N1 Pd1 N1 89.98(2) 3 23 ?
N1 Pd1 N1 89.985(19) 3 21 ?
N1 Pd1 N1 178.1(11) 23 21 ?
N1 Pd1 N1 178.1(11) 3 . ?
N1 Pd1 N1 89.983(19) 23 . ?
N1 Pd1 N1 89.99(2) 21 . ?
N2 Pd2 N2 177.6(7) . 3 ?
N2 Pd2 N2 89.977(16) . 23 ?
N2 Pd2 N2 89.974(18) 3 23 ?
N2 Pd2 N2 89.971(18) . 21 ?
N2 Pd2 N2 89.974(16) 3 21 ?
N2 Pd2 N2 177.6(7) 23 21 ?
C24 N2 C28 118.6(11) . . ?
C24 N2 Pd2 118.5(9) . . ?
C28 N2 Pd2 122.9(9) . . ?
C33 O2 C36 119.8(19) . . ?
C5 N1 C1 119.9(13) . . ?
C5 N1 Pd1 119.9(12) . . ?
C1 N1 Pd1 119.9(12) . . ?
C2 C1 N1 120.9(15) . . ?
C3 C2 C1 118.6(15) . . ?
C2 C3 C4 120.9(15) . . ?
C5 C4 C3 119.7(14) . . ?
C5 C4 C6 121.4(16) . . ?
C3 C4 C6 118.8(16) . . ?
N1 C5 C4 119.9(14) . . ?
C7 C6 C4 170(3) . . ?
C6 C7 C8 171(3) . . ?
C9 C8 C13 120.0(13) . . ?
C9 C8 C7 117.4(15) . . ?
C13 C8 C7 122.0(15) . . ?
C8 C9 C10 122.0(13) . . ?
C11 C10 C9 118.2(12) . . ?
C11 C10 C29 125.1(14) . . ?
C9 C10 C29 116.7(13) . . ?
C10 C11 C12 119.5(13) . . ?
C10 C11 C14 127.9(13) . . ?
C12 C11 C14 112.5(13) . . ?
C13 C12 C11 121.7(14) . . ?
C12 C13 C8 118.2(14) . . ?
C15 C14 C11 119.4(14) . . ?
C14 C15 C18 111.7(15) . . ?
C21 C16 C17 120.2(13) . . ?
C18 C17 C16 120.7(13) . . ?
C17 C18 C19 119.4(12) . . ?
C17 C18 C15 118.6(13) . . ?
C19 C18 C15 121.9(13) . . ?
C20 C19 C18 120.2(12) . . ?
C20 C19 C29 120.4(12) . . ?
C18 C19 C29 119.3(13) . . ?
C19 C20 C21 120.1(12) . . ?
C16 C21 C20 119.4(12) . . ?
C16 C21 C22 119.0(13) . . ?
C20 C21 C22 121.6(12) . . ?
C23 C22 C21 173.4(19) . . ?
C22 C23 C25 171.6(18) . . ?
N2 C24 C25 121.7(11) . . ?
C24 C25 C26 119.8(12) . . ?
C24 C25 C23 118.0(12) . . ?
C26 C25 C23 122.2(12) . . ?
C27 C26 C25 118.7(12) . . ?
C26 C27 C28 120.5(12) . . ?
N2 C28 C27 120.8(12) . . ?
O1 C29 C30 106.7(15) . . ?
O1 C29 C19 104.7(11) . . ?
C30 C29 C19 111.1(13) . . ?
O1 C29 C10 109.0(12) . . ?
C30 C29 C10 113.0(12) . . ?
C19 C29 C10 112.0(15) . . ?
C31 C30 C35 116.5(17) . . ?
C31 C30 C29 124.5(14) . . ?
C35 C30 C29 119.0(13) . . ?
C30 C31 C32 121.6(17) . . ?
C33 C32 C31 120.4(15) . . ?
C32 C33 C34 119.3(16) . . ?
C32 C33 O2 123.1(16) . . ?
C34 C33 O2 117.6(15) . . ?
C35 C34 C33 118.1(15) . . ?
C34 C35 C30 123.9(16) . . ?
F3' B1 F1' 120(3) . . ?
F3' B1 F4' 90(3) . . ?
F1' B1 F4' 121(3) . . ?
F1 B1 F3 116.1(18) . . ?
F1 B1 F4 115.3(18) . . ?
F3 B1 F4 87(3) . . ?
F1 B1 F2 113.1(16) . . ?
F3 B1 F2 111.6(17) . . ?
F4 B1 F2 111.3(18) . . ?
F3' B1 F2' 105(3) . . ?
F1' B1 F2' 108(3) . . ?
F4' B1 F2' 111(3) . . ?
F5 B2 F7 119(4) . . ?
F5 B2 F8 119(3) . . ?
F7 B2 F8 88(4) . . ?
F5 B2 F6 110(3) . . ?
F7 B2 F6 106(3) . . ?
F8 B2 F6 114(3) . . ?
 
_refine_diff_density_max    2.520
_refine_diff_density_min   -0.777
_refine_diff_density_rms    0.254

_shelxl_version_number 2012-9

_shelx_res_file
;
REM Solution 1  R1  2.130,  Alpha = 0.0479  in Pn-3n
REM C46.083 N9.25 O3.208 F2 Cl0.125 Pd0.5
TITL Pn-3n in Pn-3n
CELL  0.71073  39.030  39.030  39.030   90.000   90.000   90.000
ZERR   6.00   0.002   0.002   0.002   0.000   0.000   0.000
LATT  1
SYMM 1/2-X, 1/2-Y, Z
SYMM 1/2-X, Y, 1/2-Z
SYMM X, 1/2-Y, 1/2-Z
SYMM Z, X, Y
SYMM Z, 1/2-X, 1/2-Y
SYMM 1/2-Z, 1/2-X, Y
SYMM 1/2-Z, X, 1/2-Y
SYMM Y, Z, X
SYMM 1/2-Y, Z, 1/2-X
SYMM Y, 1/2-Z, 1/2-X
SYMM 1/2-Y, 1/2-Z, X
SYMM Y, X, 1/2-Z
SYMM 1/2-Y, 1/2-X, 1/2-Z
SYMM Y, 1/2-X, Z
SYMM 1/2-Y, X, Z
SYMM X, Z, 1/2-Y
SYMM 1/2-X, Z, Y
SYMM 1/2-X, 1/2-Z, 1/2-Y
SYMM X, 1/2-Z, Y
SYMM Z, Y, 1/2-X
SYMM Z, 1/2-Y, X
SYMM 1/2-Z, Y, X
SYMM 1/2-Z, 1/2-Y, 1/2-X
SFAC C H B N O F CL PD
UNIT 1728 1200 40 96 96 160 8 24
LIST 6 ! automatically inserted. Change 6 to 4 for CHECKCIF!!
TEMP -173.000
L.S. 10
BOND
ACTA
SIZE 0.2 0.2 0.08
RIGU
SIMU
FMAP 2
REM ABIN
SADI f1 f2 f1 f3 f1 f4 f2 f3 f2 f4
DFIX 1.36 b1 f1 b1 f2 b1 f3 b1 f4
FLAT c8 > c13
FLAT c16 > c21
FLAT c30 > c34
FLAT c1 > c5 n1
FLAT c24 > c28 n2
ISOR cl2
PLAN 20
WGHT    0.100000
FVAR       0.05132   0.18516   0.28001   0.21695
CL1   7    0.250000    0.750000    0.250000    10.12500    0.06179    0.07474 =
         0.06179    0.00000    0.00000    0.00000
CL2   7    0.250000    0.354782    0.250000    10.04167    0.14801    0.37610 =
         0.14801    0.00000    0.00000    0.00000
SAME pd2 pd1 n1 o1 o2 n2 c28 < c16 c15 c14 c13 < c1 c29 c30 c35 < c31 c36
PD1   8    0.250000    0.444700    0.250000    10.25000    0.12814    0.13023 =
         0.12814    0.00000    0.00000    0.00000
PD2   8    0.250000    0.830033    0.250000    10.25000    0.06117    0.08089 =
         0.06117    0.00000    0.00000    0.00000
N2    4    0.288840    0.828939    0.283933    11.00000    0.06040    0.07861 =
         0.05918    0.00309    0.00402   -0.00636
O1    5    0.379945    0.632640    0.247633    11.00000    0.05777    0.10730 =
         0.12077    0.01722    0.00286    0.00831
O2    5    0.469012    0.626729    0.115956    11.00000    0.16472    0.19726 =
         0.14154   -0.02433    0.03138   -0.01373
SAME c1 > c5 n1
SAME c8 > c13
SAME c16 > c21
SAME c30 > c34
SAME n2 c24 > c28
N1    4    0.290571    0.443865    0.282021    11.00000    0.13741    0.14351 =
         0.15762    0.03329   -0.02013   -0.02854
C1    1    0.296839    0.415322    0.301666    11.00000    0.16726    0.15095 =
         0.20248    0.05447   -0.05870   -0.04646
AFIX  43
H1    2    0.281205    0.396676    0.301085    11.00000   -1.20000
AFIX   0
C2    1    0.325399    0.413394    0.322125    11.00000    0.17308    0.15898 =
         0.20736    0.06081   -0.06389   -0.04951
AFIX  43
H2    2    0.329444    0.393814    0.336007    11.00000   -1.20000
AFIX   0
C3    1    0.347919    0.440289    0.322092    11.00000    0.15972    0.15006 =
         0.19940    0.05616   -0.05494   -0.03934
AFIX  43
H3    2    0.367492    0.439572    0.336542    11.00000   -1.20000
AFIX   0
C4    1    0.342581    0.468397    0.301376    11.00000    0.12634    0.13651 =
         0.15786    0.03057   -0.02060   -0.01660
C5    1    0.313491    0.470356    0.281865    11.00000    0.12274    0.13045 =
         0.15132    0.02697   -0.01384   -0.01556
AFIX  43
H5    2    0.309242    0.490080    0.268250    11.00000   -1.20000
AFIX   0
C6    1    0.367026    0.496720    0.302801    11.00000    0.12173    0.13717 =
         0.17977    0.03374   -0.02394   -0.01488
C7    1    0.385849    0.520347    0.298889    11.00000    0.11563    0.13960 =
         0.16760    0.02684   -0.02308   -0.01457
C8    1    0.410652    0.547100    0.299207    11.00000    0.10069    0.12438 =
         0.15400    0.02447   -0.02087   -0.00320
C9    1    0.403796    0.575717    0.280154    11.00000    0.08078    0.11785 =
         0.13998    0.01340   -0.00537    0.00439
AFIX  43
H9    2    0.382161    0.577688    0.269177    11.00000   -1.20000
AFIX   0
C10   1    0.427419    0.601859    0.276396    11.00000    0.07241    0.11426 =
         0.13499    0.01092   -0.00300    0.00902
C11   1    0.458234    0.599165    0.293575    11.00000    0.07780    0.12013 =
         0.15138    0.01466   -0.01376    0.00779
C12   1    0.465648    0.569476    0.311614    11.00000    0.09585    0.12784 =
         0.16510    0.02268   -0.02445    0.00470
AFIX  43
H12   2    0.487308    0.567328    0.322507    11.00000   -1.20000
AFIX   0
C13   1    0.442420    0.542990    0.314162    11.00000    0.10812    0.13096 =
         0.17050    0.02223   -0.02875   -0.00140
AFIX  43
H13   2    0.448135    0.522450    0.325906    11.00000   -1.20000
AFIX   0
C14   1    0.488277    0.624880    0.293736    11.00000    0.07549    0.11734 =
         0.15512    0.00599   -0.00096    0.01239
AFIX  23
H14A  2    0.488894    0.635733    0.316655    11.00000   -1.20000
H14B  2    0.509721    0.611560    0.291268    11.00000   -1.20000
AFIX   0
C15   1    0.489082    0.652118    0.268461    11.00000    0.07392    0.11311 =
         0.14517   -0.00096    0.00442    0.01298
AFIX  23
H15A  2    0.487396    0.642045    0.245243    11.00000   -1.20000
H15B  2    0.511228    0.664379    0.270069    11.00000   -1.20000
AFIX   0
C16   1    0.441222    0.732727    0.293383    11.00000    0.05774    0.10624 =
         0.12236   -0.00136   -0.00320   -0.00454
AFIX  43
H16   2    0.446773    0.754706    0.302246    11.00000   -1.20000
AFIX   0
C17   1    0.467033    0.709535    0.286258    11.00000    0.05931    0.11300 =
         0.15268   -0.00676   -0.00032    0.00050
AFIX  43
H17   2    0.490235    0.715774    0.290157    11.00000   -1.20000
AFIX   0
C18   1    0.459550    0.677809    0.273697    11.00000    0.06033    0.10688 =
         0.13305    0.00176    0.00114    0.00339
C19   1    0.425520    0.668776    0.268194    11.00000    0.06096    0.10343 =
         0.12501    0.00440    0.00537    0.00421
C20   1    0.399696    0.691739    0.275253    11.00000    0.05438    0.09541 =
         0.11485    0.00315   -0.00154   -0.00134
AFIX  43
H20   2    0.376476    0.685416    0.271606    11.00000   -1.20000
AFIX   0
C21   1    0.407533    0.724086    0.287681    11.00000    0.05591    0.09091 =
         0.08948    0.00856    0.00072   -0.00211
C22   1    0.381679    0.749067    0.293462    11.00000    0.05552    0.08786 =
         0.08734    0.00270   -0.00484   -0.00580
C23   1    0.361871    0.771108    0.301085    11.00000    0.05688    0.08346 =
         0.07636    0.00236   -0.00297   -0.01148
C24   1    0.311545    0.802602    0.282372    11.00000    0.05435    0.06771 =
         0.06764    0.00260    0.00139   -0.01296
AFIX  43
H24   2    0.308947    0.785720    0.265032    11.00000   -1.20000
AFIX   0
C25   1    0.338143    0.799755    0.305202    11.00000    0.05915    0.08838 =
         0.07473    0.00010   -0.00412   -0.01065
C26   1    0.342150    0.824023    0.330600    11.00000    0.08640    0.09243 =
         0.07644   -0.00306   -0.01394   -0.00585
AFIX  43
H26   2    0.360343    0.822276    0.346675    11.00000   -1.20000
AFIX   0
C27   1    0.319350    0.850716    0.332177    11.00000    0.08860    0.09425 =
         0.06922   -0.00607   -0.01635   -0.00116
AFIX  43
H27   2    0.321840    0.867732    0.349403    11.00000   -1.20000
AFIX   0
C28   1    0.292853    0.853031    0.308952    11.00000    0.08293    0.07736 =
         0.06420   -0.00007   -0.00757   -0.00553
AFIX  43
H28   2    0.277200    0.871615    0.310377    11.00000   -1.20000
AFIX   0
C29   1    0.416933    0.632564    0.251806    11.00000    0.05516    0.10518 =
         0.11971    0.00162    0.00395    0.00721
C30   1    0.431874    0.629424    0.216898    11.00000    0.07150    0.12739 =
         0.12326   -0.00310    0.00894    0.00467
C31   1    0.447282    0.600663    0.204489    11.00000    0.11143    0.13899 =
         0.13350   -0.00711    0.01716    0.02308
AFIX  43
H31   2    0.449162    0.581078    0.218819    11.00000   -1.20000
AFIX   0
C32   1    0.460201    0.599287    0.171674    11.00000    0.13869    0.16056 =
         0.14013   -0.01654    0.02990    0.00751
AFIX  43
H32   2    0.471382    0.579105    0.163921    11.00000   -1.20000
AFIX   0
C33   1    0.457032    0.626834    0.150137    11.00000    0.12768    0.15783 =
         0.13387   -0.01713    0.01781   -0.00936
C34   1    0.441161    0.656225    0.161830    11.00000    0.10563    0.15193 =
         0.11945   -0.01023    0.00820   -0.01563
AFIX  43
H34   2    0.438111    0.675456    0.147225    11.00000   -1.20000
AFIX   0
C35   1    0.429960    0.656860    0.195025    11.00000    0.07198    0.12551 =
         0.11731   -0.00658   -0.00147   -0.00638
AFIX  43
H35   2    0.420274    0.677544    0.203438    11.00000   -1.20000
AFIX   0
C36   1    0.487091    0.596282    0.102433    11.00000    0.21230    0.21186 =
         0.16647   -0.03510    0.04991    0.00731
AFIX 137
H36A  2    0.471310    0.576762    0.101826    11.00000   -1.50000
H36B  2    0.506578    0.590832    0.117299    11.00000   -1.50000
H36C  2    0.495361    0.601084    0.079217    11.00000   -1.50000
AFIX   0
PART 0
SAME b1 f1' > f4'
B1    3    0.283172    0.562231    0.325789    10.50000   21.00000
PART 1 30.5
F1    6    0.269370    0.590450    0.338794    30.50000   21.00000
F2    6    0.264853    0.549144    0.298592    30.50000   21.00000
F3    6    0.316754    0.563655    0.318858    30.50000   21.00000
F4    6    0.290881    0.537487    0.348862    30.50000   21.00000
PART 2 -30.5
F1'   6    0.293671    0.580648    0.352278   -30.50000   21.00000
F2'   6    0.252924    0.577341    0.313344   -30.50000   21.00000
F3'   6    0.303179    0.558543    0.298646   -30.50000   21.00000
F4'   6    0.279927    0.528250    0.327818   -30.50000   21.00000
PART 0

PART -1 10.33333
SAME b1 > f4
B2    3    0.395593    0.388032    0.403834    10.33333   41.00000
F5    6    0.389001    0.403543    0.433297    10.33333   41.00000
F6    6    0.404093    0.353871    0.409423    10.33333   41.00000
F7    6    0.371523    0.387616    0.379755    10.33333   41.00000
F8    6    0.415995    0.403799    0.381134    10.33333   41.00000
HKLF 4

REM  Pn-3n in Pn-3n
REM R1 =  0.2212 for    2713 Fo > 4sig(Fo)  and  0.2266 for all    3048 data
REM    418 parameters refined using   1564 restraints

END

WGHT      0.2000      0.0000

REM Highest difference peak  2.520,  deepest hole -0.777,  1-sigma level  0.254
Q1    1   0.2500  0.2500  0.2500  10.04167  0.05    2.09
Q2    1   0.2500  0.3478  0.3478  10.50000  0.05    1.50
Q3    1   0.2500  0.5399  0.2500  10.25000  0.05    1.40
Q4    1   0.2500  0.5571  0.2500  10.25000  0.05    1.38
Q5    1   0.2500  0.5198  0.2500  10.25000  0.05    1.35
Q6    1   0.5688  0.6222  0.1596  11.00000  0.05    1.28
Q7    1   0.5750  0.6243  0.1504  11.00000  0.05    1.22
Q8    1   0.3758  0.8790  0.4098  11.00000  0.05    1.19
Q9    1   0.3862  0.7997  0.4341  11.00000  0.05    1.14
Q10   1   0.5069  0.5002  0.3660  11.00000  0.05    1.10
Q11   1   0.5926  0.5926  0.2500  10.50000  0.05    1.09
Q12   1   0.3964  0.7312  0.0881  11.00000  0.05    1.09
Q13   1   0.3928  0.7796  0.4204  11.00000  0.05    1.08
Q14   1   0.5798  0.6231  0.1352  11.00000  0.05    1.08
Q15   1   0.3752  0.9002  0.3902  11.00000  0.05    1.08
Q16   1   0.3219  0.3219  0.3219  10.33333  0.05    1.04
Q17   1   0.5111  0.5111  0.2500  10.50000  0.05    1.04
Q18   1   0.2500  0.3874  0.3874  10.50000  0.05    1.03
Q19   1   0.3896  0.7931  0.4281  11.00000  0.05    1.00
Q20   1   0.3819  0.5671  0.3826  11.00000  0.05    1.00
;
_shelx_res_checksum   44926

_shelx_hkl_file
;
   0  -2   0 9740.53  215.88
   0   0   2 9999.00  215.48
   2   1   0    0.00    0.40
   0   2  -1    0.00    0.40
   0   2   1    0.20    0.40
   0   2   1    0.40    0.40
   1   0  -2    0.20    0.40
   1   0   2    0.20    0.40
   1   0   2    0.00    0.40
   2  -1   0    0.00    0.40
   2  -1   0    0.00    0.40
  -1   0   2    0.20    0.40
   0  -2  -1    0.80    0.40
   0  -2  -1    0.40    0.40
   0  -2   1    0.60    0.40
  -1   0  -2    0.00    0.40
  -2   1   0    0.10    0.40
  -1   0  -2    0.00    0.30
  -2  -1   0    0.20    0.40
  -2   1   0    0.30    0.40
  -2  -1   0    0.30    0.40
   2   0   1    0.50    0.40
   2   0  -1    0.00    0.40
   2   0   1    0.00    0.40
   1   2   0    0.20    0.40
   1   2   0    0.00    0.40
   1  -2   0    0.20    0.40
   0   1  -2    0.00    0.40
   0   1   2    0.40    0.40
   0   1   2    0.00    0.40
   1  -2   0    0.00    0.30
  -2   0  -1    0.00    0.40
  -2   0   1    0.20    0.40
  -1  -2   0    0.30    0.40
  -1  -2   0    0.20    0.40
  -1   2   0    0.30    0.40
   0  -1  -2    0.40    0.40
   0  -1  -2    0.10    0.40
   0  -1   2    0.60    0.40
  -2   0  -1    0.20    0.40
  -2  -1  -1  290.77    6.80
   1   2  -1  285.27    6.60
  -1   1   2  292.87    6.50
   2  -1   1  297.77    6.70
  -2   1   1  296.37    6.80
  -2   1   1  296.27    6.50
  -1  -2  -1  291.07    6.80
  -1  -2  -1  292.37    6.70
  -1   2   1  282.47    6.70
  -1   2   1  299.07    6.60
  -1  -1  -2  292.47    6.70
  -1  -1  -2  288.97    6.70
  -1  -1   2  288.97    6.60
  -1  -1   2  287.67    6.50
  -2   1  -1  294.37    6.70
  -1   2  -1  281.77    6.70
  -1  -2   1  280.37    6.60
  -1  -2   1  284.47    6.60
   1  -2  -1  283.17    6.70
   1  -2  -1  290.97    6.60
   1  -1  -2  283.17    6.50
   1   1   2  294.57    6.70
  -2  -1   1  284.87    6.70
   1   2   1  281.87    6.70
   1   2   1  280.67    6.60
   2  -1  -1  294.37    6.80
  -2  -1   1  285.97    6.50
   2   1   1  301.37    6.70
  -2  -2   0  109.89    2.90
  -2   0  -2  116.29    2.90
  -2   0   2  110.79    2.90
  -2   2   0  108.39    2.80
  -2   2   0  112.19    2.80
   0  -2  -2  110.39    3.00
   0  -2  -2  107.89    2.80
   0   2  -2  105.49    2.90
   0   2   2  109.09    3.00
   0   2   2  108.79    2.90
   2  -2   0  108.29    2.80
   2   0   2  108.69    2.90
   2   0   2  109.09    2.90
   2   2   0  108.59    2.90
   2   2   0  107.29    2.80
  -2  -2  -1    0.00    0.60
  -2  -2  -1    0.00    0.50
   2   2  -1    0.30    0.50
   2  -2   1    0.10    0.60
  -2  -1  -2    0.50    0.50
  -2  -1  -2    0.00    0.60
   2  -1   2    0.00    0.60
   2   1  -2    0.40    0.50
   1   2  -2    0.00    0.40
  -2   1   2    0.50    0.60
   2   2  -1    0.00    0.50
   1  -2   2    0.00    0.60
  -2   2   1    0.00    0.50
  -2   2   1    0.00    0.50
  -1  -2  -2    0.20    0.50
  -1  -2  -2    0.00    0.60
  -1   2   2    0.00    0.50
   2  -1   2    0.00    0.40
   2  -2   1    0.50    0.50
  -1   2   2    0.20    0.60
   1   2  -2    0.10    0.50
  -1  -2   2    0.00    0.40
   1  -2  -2    0.00    0.50
  -2   2  -1    0.00    0.60
  -2   1  -2    0.00    0.60
   1  -2  -2    0.00    0.50
   1   2   2    0.00    0.60
   1   2   2    0.90    0.60
   2  -2  -1    0.00    0.50
   2  -2  -1    0.00    0.50
  -1   2  -2    0.00    0.60
  -2  -2   1    0.50    0.50
   2  -1  -2    0.00    0.60
  -1  -2   2    0.10    0.50
  -2  -1   2    0.00    0.50
  -2   1  -2    0.10    0.40
   2   1   2    0.80    0.60
   2   1   2    0.00    0.60
  -2   2  -1    0.10    0.50
  -2  -2   1    0.60    0.50
   2   2   1    0.50    0.60
   2   2   1    0.00    0.50
  -2  -2  -2  398.06    9.30
   2   2  -2  399.96    9.00
   2  -2   2  392.86    9.00
  -2   2   2  402.86    9.00
  -2   2   2  410.36    9.40
  -2   2  -2  388.16    9.00
   2  -2  -2  404.16    9.40
   2  -2  -2  407.26    9.00
  -2  -2   2  399.26    9.00
  -2  -2   2  385.06    9.20
   2   2   2  396.26    9.30
   2   2   2  401.46    9.20
  -3   0   0    0.30    0.60
   0  -3   0    1.00    0.60
   0   0  -3    1.40    0.50
   0   0  -3    1.20    0.60
   0   0   3    0.70    0.50
   0   0   3    0.40    0.50
   0   3   0    1.30    0.50
   0   3   0    0.20    0.60
   3   0   0    1.40    0.60
   3   0   0    1.00    0.50
   0   3  -1  215.28    5.20
   0   3  -1  224.38    5.40
   0   3   1  230.88    5.50
   0   3   1  219.28    5.40
   1   0  -3  224.08    5.40
   1   0   3  223.98    5.40
   1   0   3  228.38    5.50
   3  -1   0  235.98    5.50
   3   1   0  235.48    5.60
   3   1   0  228.18    5.30
   0  -3   1  212.08    5.20
   0  -3   1  215.78    5.40
  -3   1   0  236.08    5.50
  -3   1   0  226.98    5.30
  -1   0  -3  221.08    5.40
  -1   0   3  224.78    5.40
  -1   0   3  224.78    5.20
   0  -3  -1  219.18    5.40
   0  -3  -1  234.58    5.50
  -3  -1   0  229.58    5.30
  -3  -1   0  229.18    5.50
   2   0   3    0.70    0.70
   2   0   3    0.40    0.60
   2   0  -3    0.00    0.70
   3   2   0    0.70    0.70
   3   2   0    0.30    0.60
  -2   0  -3    0.10    0.60
  -3  -2   0    0.40    0.70
  -3  -2   0    0.90    0.60
  -3   2   0    0.00    0.70
  -3   2   0    0.00    0.60
   0  -3   2    0.00    0.70
  -2   0  -3    0.00    0.80
   0   3   2    1.20    0.70
   0   3   2    0.70    0.70
   0  -3  -2    0.00    0.70
   0   3  -2    0.00    0.70
  -2   0   3    0.20    0.70
   3  -2   0    0.00    0.70
   3  -2   0    0.00    0.60
   0  -3  -2    0.50    0.70
   1  -3   0  231.28    5.40
   1   3   0  216.78    5.40
   0   1  -3  222.98    5.20
   1   3   0  214.18    5.40
   0   1   3  235.08    5.40
   1  -3   0  218.58    5.30
   3   0  -1  227.58    5.10
   0   1   3  226.18    5.50
  -3   0  -1  231.28    5.50
  -3   0   1  231.28    5.50
  -1  -3   0  221.28    5.40
  -1  -3   0  229.28    5.40
  -1   3   0  225.38    5.30
  -1   3   0  220.08    5.40
   3   0   1  227.38    5.50
   3   0   1  231.08    5.40
   0  -1  -3  222.28    5.30
   0  -1   3  223.88    5.20
   0  -1  -3  223.58    5.50
  -3  -1  -1    0.50    0.70
   1  -1   3    0.00    0.70
   3  -1   1    0.40    0.70
  -3   1   1    0.00    0.60
   1  -3   1    0.00    0.60
  -3  -1  -1    0.00    0.60
   3   1  -1    0.00    0.40
   1   3  -1    0.10    0.50
   1   3  -1    0.00    0.60
  -1   3   1    0.00    0.60
  -1  -1  -3    0.40    0.70
  -1  -3  -1    0.40    0.60
   1  -3   1    0.20    0.40
   3  -1   1    0.00    0.60
  -3   1   1    0.70    0.50
   1   1  -3    0.00    0.50
   1   1  -3    0.10    0.50
   1  -1   3    0.00    0.40
  -1  -3  -1    0.00    0.60
  -1   1   3    0.60    0.50
  -1   3   1    0.70    0.60
   3   1  -1    0.00    0.70
  -1   1   3    0.00    0.60
   1  -3  -1    0.70    0.60
   1  -3  -1    0.30    0.60
  -1   3  -1    0.00    0.60
  -3  -1   1    0.40    0.50
   3  -1  -1    0.00    0.70
   1   1   3    0.00    0.60
  -3  -1   1    0.00    0.60
  -1  -3   1    0.00    0.60
   1   3   1    0.80    0.60
  -1  -1   3    0.10    0.50
  -1  -1   3    0.10    0.50
  -1   3  -1    0.00    0.40
  -1   1  -3    0.00    0.70
   3  -1  -1    0.00    0.50
  -3   1  -1    0.50    0.70
   1  -1  -3    0.40    0.50
  -1   1  -3    0.00    0.40
  -3   1  -1    0.10    0.60
   1  -1  -3    0.00    0.60
   1   3   1    0.00    0.60
   1   1   3    0.70    0.70
   3   1   1    0.20    0.70
   3   1   1    0.00    0.60
  -1  -3   1    0.00    0.50
  -1   3   2   30.70    1.50
  -1   3   2   34.20    1.70
   3  -2   1   32.40    1.50
   1  -3   2   32.70    1.70
   1   3  -2   30.10    1.30
   1   3  -2   33.20    1.50
  -2   1   3   31.10    1.70
  -2  -1  -3   33.40    1.70
  -2  -1  -3   30.00    1.70
   3  -2   1   31.20    1.50
   2  -1   3   30.80    1.30
   2  -1   3   32.80    1.70
   2   1  -3   30.30    1.50
   2   1  -3   31.40    1.10
  -1  -3  -2   31.10    1.70
  -1  -3  -2   31.60    1.70
  -3   2   1   34.60    1.80
  -3   2   1   32.60    1.40
   3   2  -1   31.10    1.60
   3   2  -1   30.60    1.30
  -3  -2  -1   32.60    1.60
  -3  -2  -1   34.40    1.70
  -2   1   3   32.80    1.20
   1  -3  -2   33.10    1.60
  -1   3  -2   32.70    1.70
   3  -2  -1   32.90    1.40
  -2   1  -3   32.60    1.70
   1   3   2   31.30    1.70
   1  -3  -2   28.80    1.60
  -3  -2   1   32.20    1.40
  -3   2  -1   33.00    1.50
  -3   2  -1   32.90    1.70
  -1  -3   2   30.20    1.30
  -1  -3   2   31.60    1.50
  -2   1  -3   32.60    1.50
   3   2   1   31.50    1.70
  -3  -2   1   32.60    1.70
   3   2   1   34.50    1.60
   2  -1  -3   31.40    1.20
   2   1   3   32.00    1.60
   3  -2  -1   32.30    1.70
   2   1   3   33.80    1.70
  -2  -1   3   31.90    1.60
  -2  -1   3   29.80    1.10
   1   3   2   33.30    1.70
   2  -1  -3   32.10    1.70
   0   2   3    0.00    0.60
   2   3   0    0.00    0.60
   2  -3   0    1.00    0.70
   0   2   3    0.00    0.70
  -3   0  -2    0.60    0.60
  -3   0   2    0.60    0.70
  -2  -3   0    0.00    0.60
  -2  -3   0    0.00    0.60
  -2   3   0    0.40    0.60
   2  -3   0    0.40    0.60
  -2   3   0    0.00    0.70
   0  -2  -3    0.00    0.70
   0  -2  -3    0.30    0.60
   0  -2   3    0.10    0.70
   0   2  -3    0.00    0.70
   3   0   2    0.00    0.70
   3   0  -2    0.00    0.70
   3   0   2    0.00    0.70
   2   3   0    0.00    0.60
   3  -1   2   31.60    1.60
   3  -1   2   32.10    1.60
   3   1  -2   34.10    1.70
  -2   3   1   29.30    1.50
   2  -3   1   31.60    1.40
   1   2  -3   32.00    1.40
  -1  -2  -3   31.80    1.70
  -3  -1  -2   32.20    1.60
   2   3  -1   33.20    1.50
  -3   1   2   32.20    1.10
  -2  -3  -1   31.50    1.70
  -2  -3  -1   32.60    1.60
  -3   1   2   33.10    1.80
   1  -2   3   30.30    1.60
   2  -3   1   31.30    1.60
   2   3  -1   31.50    1.50
  -1   2   3   33.50    1.40
  -2   3   1   33.80    1.60
  -3  -1  -2   30.70    1.80
  -1   2   3   33.00    1.70
   1   2  -3   30.90    1.30
  -3  -1   2   34.10    1.80
   3  -1  -2   32.90    1.10
   2  -3  -1   31.20    1.50
   1   2   3   35.50    1.80
   3  -1  -2   29.70    1.60
   2  -3  -1   28.60    1.50
  -2  -3   1   34.40    1.60
  -2  -3   1   30.60    1.50
  -2   3  -1   31.30    1.30
  -2   3  -1   31.90    1.60
   3   1   2   32.00    1.80
   2   3   1   33.60    1.80
   2   3   1   30.20    1.60
  -1  -2   3   30.30    1.20
  -1  -2   3   32.70    1.50
  -1   2  -3   32.50    1.70
   1   2   3   29.80    1.60
  -3   1  -2   32.60    1.80
   1  -2  -3   32.60    1.60
   1  -2  -3   31.90    1.40
   3   1   2   31.80    1.60
  -3   1  -2   31.90    1.60
  -3  -2  -2    0.00    0.80
  -3  -2  -2    0.20    0.80
   2  -2   3    0.00    0.50
   2  -2   3    0.40    0.90
   2   2  -3    0.30    0.70
   3  -2   2    0.30    0.70
  -3   2   2    0.00    0.80
  -3   2   2    0.00    0.60
  -2  -3  -2    0.00    0.70
  -2  -3  -2    1.00    0.80
   2  -3   2    0.50    0.50
   2  -3   2    0.00    0.80
  -2  -2  -3    0.00    0.70
  -2  -2  -3    0.10    0.90
  -2   3   2    0.60    0.80
   3  -2   2    0.60    0.80
   3   2  -2    0.00    0.80
   3   2  -2    0.00    0.60
  -2   2   3    0.70    0.80
  -2   2   3    0.00    0.50
   2   3  -2    0.00    0.70
   2   3  -2    0.90    0.70
   2   2  -3    0.80    0.60
  -2   3   2    0.00    0.70
   2  -3  -2    0.40    0.80
  -2  -2   3    0.20    0.70
  -2  -3   2    0.50    0.70
  -2  -3   2    0.90    0.70
   2  -2  -3    0.10    0.80
   2  -2  -3    0.00    0.60
  -3  -2   2    0.30    0.80
  -3  -2   2    0.00    0.50
  -3   2  -2    1.20    0.70
   2  -3  -2    0.00    0.70
   2   2   3    0.10    0.80
   2   2   3    0.10    0.80
  -2   3  -2    0.10    0.50
  -2   3  -2    0.30    0.80
   2   3   2    0.60    0.80
   2   3   2    0.30    0.80
   3  -2  -2    0.00    0.80
   3  -2  -2    0.00    0.60
  -3   2  -2    0.00    0.80
  -2  -2   3    0.00    0.60
  -2   2  -3    0.30    0.50
  -2   2  -3    0.00    0.90
   3   2   2    0.40    0.80
   3   2   2    0.10    0.80
  -3  -3   0  352.76    8.40
  -3  -3   0  342.07    8.20
  -3   0  -3  356.16    8.40
  -3   0   3  345.37    8.40
  -3   3   0  357.76    8.30
  -3   3   0  356.06    8.30
   0  -3  -3  351.46    8.50
   0  -3  -3  346.97    8.30
   0  -3   3  352.86    8.30
   0   3  -3  348.87    8.30
   0   3   3  354.06    8.50
   0   3   3  350.56    8.30
   3  -3   0  352.06    8.30
   3  -3   0  357.36    8.30
   3   0   3  356.26    8.30
   3   0   3  348.57    8.40
   3   3   0  340.97    8.40
   3   3   0  356.16    8.30
  -3  -3  -1    0.40    0.80
  -3  -3  -1    0.00    0.80
   3   3  -1    0.00    0.80
   3   3  -1    0.10    0.70
  -3  -1  -3    0.00    0.80
  -3  -1  -3    0.00    0.90
   3  -1   3    0.00    0.70
   3  -1   3    0.30    1.00
   3   1  -3    1.50    0.90
  -3   1   3    0.60    0.90
   3  -3   1    0.00    0.90
   1   3  -3    0.20    0.60
  -3   3   1    0.10    0.80
  -3   3   1    0.10    0.80
  -1  -3  -3    0.30    0.80
  -1   3   3    0.00    0.70
   1   3  -3    0.00    0.80
   3  -3   1    0.00    0.70
  -1   3   3    0.00    0.80
   1  -3   3    0.00    0.90
  -1   3  -3    1.30    0.90
   1  -3  -3    0.50    0.80
  -1  -3   3    0.30    0.50
  -3   3  -1    0.70    0.90
   1  -3  -3    0.00    0.90
   1   3   3    0.50    0.90
   1   3   3    0.40    0.80
   1   3   3    1.10    0.80
   3  -3  -1    0.00    0.80
   3  -3  -1    0.00    0.70
  -1  -3   3    0.00    0.70
  -3   3  -1    0.00    0.70
   3  -1  -3    0.30    0.90
   3  -1  -3    0.00    0.40
  -3  -1   3    0.00    0.80
  -3   1  -3    0.00    0.70
  -3   1  -3    0.20    1.00
   3   1   3    0.00    0.80
   3   1   3    0.00    0.90
  -3  -3   1    0.50    0.80
  -3  -3   1    0.00    0.70
   3   3   1    0.00    0.90
   3   3   1    0.00    0.80
  -3  -3  -2 2092.79   46.40
  -3  -3  -2 2025.00   45.80
   3   2  -3 2120.39   45.40
  -3   3   2 2120.39   45.60
  -3  -2  -3 2099.39   46.30
  -3  -2  -3 2098.19   45.90
   3  -3   2 2098.99   46.00
   3  -3   2 2101.09   45.80
   2   3  -3 2049.89   45.60
   3  -2   3 2068.39   46.00
  -3   2   3 2073.69   46.30
  -3   2   3 2155.88   45.60
   2   3  -3 2057.99   46.00
   3   3  -2 2108.99   45.60
  -3   3   2 2083.59   46.30
   2  -3   3 2095.89   45.90
  -2  -3  -3 2077.79   46.40
  -2  -3  -3 2035.80   45.80
   2  -3   3 2014.50   45.80
   3  -2   3 2108.29   45.90
  -2   3   3 2079.09   45.60
  -2   3   3 2115.89   46.40
  -2   3  -3 1995.90   45.80
  -2   3  -3 2055.79   45.80
   2  -3  -3 2082.79   46.30
   2  -3  -3 2076.29   45.60
  -2  -3   3 2020.00   46.00
  -2  -3   3 2129.09   45.60
  -3   3  -2 2065.89   46.00
  -3   2  -3 2115.19   46.00
   2   3   3 2069.69   46.40
   2   3   3 2046.00   45.80
   3  -3  -2 2070.89   46.30
   3  -3  -2 2154.38   45.60
  -3  -2   3 2103.79   46.20
  -3  -2   3 2092.29   45.40
   3  -2  -3 2095.59   45.70
  -3   2  -3 2123.69   45.90
  -3  -3   2 2086.89   45.60
  -3  -3   2 2039.20   46.20
   3   2   3 2066.29   45.80
  -3   3  -2 1989.10   45.80
   3   3   2 2106.19   45.80
  -3  -3  -3    0.00    1.00
  -3  -3  -3    0.00    1.10
   3   3  -3    0.30    0.80
   3  -3   3    0.00    1.10
   3   3  -3    0.80    0.90
  -3   3   3    0.00    0.80
  -3   3   3    0.70    1.00
   3  -3   3    0.10    0.70
  -3   3  -3    0.30    1.10
   3  -3  -3    0.00    0.80
   3  -3  -3    0.00    1.00
  -3  -3   3    1.40    0.80
  -3   3  -3    0.60    0.70
  -3  -3   3    0.60    0.90
   3   3   3    0.00    1.00
   3   3   3    0.00    1.00
  -4   0   0  688.83   15.10
   0  -4   0  657.73   14.90
   0   0  -4  649.14   14.90
   0   0   4  659.23   14.90
   0   0   4  638.14   14.80
   0   4   0  671.53   14.90
   0   4   0  634.64   14.90
   4   0   0  657.73   15.10
   4   0   0  658.93   14.70
   4  -1   0    0.70    0.80
   4  -1   0    0.10    0.70
   4   1   0    0.00    0.80
   4   1   0    0.60    0.70
  -4   1   0    0.00    0.80
  -4   1   0    0.00    0.70
  -1   0  -4    0.20    0.80
  -1   0   4    0.30    0.70
  -1   0   4    0.00    0.60
   0  -4  -1    0.00    0.70
   0  -4  -1    0.00    0.80
   0  -4   1    0.80    0.80
   0   4  -1    0.10    0.60
   0   4  -1    0.10    0.80
   0   4   1    0.00    0.70
   0   4   1    0.00    0.80
   1   0  -4    0.00    0.70
   1   0   4    0.00    0.70
   1   0   4    0.00    0.70
   1   0   4    0.60    0.80
  -4  -1   0    0.20    0.70
  -4  -1   0    0.90    0.80
   0   4   2  134.99    3.80
   2   0   4  146.29    4.00
   4  -2   0  135.29    3.90
   4  -2   0  135.59    3.70
   4   2   0  140.79    4.00
   4   2   0  139.79    3.70
   0  -4   2  140.49    3.90
   2   0  -4  141.69    3.90
   2   0   4  135.39    3.80
   0   4   2  141.39    3.90
   0  -4   2  126.69    3.30
   0   4  -2  131.09    3.40
  -4  -2   0  140.09    4.00
  -4  -2   0  144.29    3.70
  -4   2   0  144.29    3.90
  -4   2   0  144.09    3.80
  -2   0  -4  141.69    3.80
  -2   0   4  134.79    3.80
  -2   0   4  133.79    3.40
   0  -4  -2  135.29    3.90
   0  -4  -2  138.89    3.90
   0   4  -2  140.89    3.90
   3   0   4    0.80    0.90
   4   3   0    0.00    0.80
   4   3   0    0.70    1.00
   4  -3   0    0.00    0.90
  -4  -3   0    0.50    1.00
  -4  -3   0    0.00    0.90
  -4   3   0    0.00    0.90
  -4   3   0    0.00    1.00
   0   4  -3    0.00    1.00
   0   4   3    0.00    0.90
   0   4   3    0.60    0.90
   3   0  -4    0.40    1.00
   0  -4   3    0.00    1.00
  -3   0   4    0.20    0.90
   0  -4  -3    0.00    0.90
   0  -4  -3    0.70    1.00
  -3   0  -4    0.80    0.90
   4  -3   0    0.00    0.90
   3   0   4    0.00    1.00
  -1   4   0    0.20    0.70
  -1   4   0    0.60    0.80
   0  -1  -4    0.00    0.70
  -1  -4   0    0.40    0.80
  -1  -4   0    0.00    0.70
  -4   0   1    1.10    0.80
   1  -4   0    0.00    0.80
   1   4   0    1.00    0.70
   1   4   0    0.00    0.80
   1  -4   0    0.00    0.70
   0  -1  -4    0.00    0.80
   0   1  -4    0.00    0.80
   0   1   4    0.00    0.70
   4   0  -1    0.60    0.90
   0   1  -4    0.90    0.60
   4   0   1    0.00    0.80
   0  -1   4    0.70    0.60
   0   1   4    0.00    0.70
   4   0   1    0.10    0.80
  -4   0  -1    0.20    0.80
   4   0  -1    0.60    0.60
   4   0  -1    0.30    0.60
   0  -1   4    0.50    0.80
  -4   1   1  680.13   15.50
  -4   1   1  664.33   14.90
   1  -1   4  682.93   15.10
   1  -4   1  641.24   15.20
  -4  -1  -1  680.33   15.20
  -1   1   4  667.53   15.30
   1  -1   4  657.33   15.10
  -1   1   4  672.03   15.00
   1   4  -1  656.93   15.10
   1   4  -1  637.54   15.20
   1   1  -4  654.33   15.20
   1  -4   1  670.63   15.10
   4  -1   1  688.93   15.40
  -1  -1  -4  674.43   15.20
  -1  -4  -1  684.33   15.20
  -1   4   1  688.03   15.20
  -1   4   1  669.33   15.30
  -4  -1  -1  693.03   15.50
  -1  -4  -1  670.83   15.30
   1   1  -4  673.03   15.00
   4   1  -1  675.53   14.90
  -1   4  -1  663.03   15.00
   1  -1  -4  681.83   15.40
   1  -1  -4  655.33   15.00
   1   1   4  690.13   15.20
  -1  -1   4  666.23   15.20
  -1  -4   1  633.64   15.10
  -1  -1   4  673.53   15.00
  -1   1  -4  680.33   15.20
   1  -4  -1  678.03   15.20
   1  -4  -1  678.63   15.30
   1   4   1  636.64   15.30
  -4   1  -1  666.93   15.30
   1   1   4  709.73   15.40
   4   1   1  680.13   15.50
  -4  -1   1  684.63   15.40
  -4  -1   1  676.73   14.90
   4   1   1  683.53   15.20
   1   4   1  677.93   15.20
   4  -1  -1  662.53   14.90
  -1  -4   1  674.73   15.20
  -1   4  -1  645.84   15.20
  -4  -2  -1    6.70    1.10
   2  -1   4    6.00    0.80
   1  -4   2    6.10    0.60
  -4   2   1    7.90    0.90
  -1   4   2    6.00    1.00
  -4  -2  -1    7.60    1.00
   1  -4   2    8.00    1.10
  -4   2   1    7.50    1.10
   2  -1   4    7.80    1.20
   2   1  -4    5.30    0.90
   2   1  -4    6.40    0.80
   1   4  -2    6.00    0.70
  -2   1   4    5.70    0.70
  -2   1   4    7.30    1.00
   1   4  -2    7.70    1.00
   4  -2   1    6.40    1.00
   4  -2   1    5.40    1.00
   4   2  -1    7.20    1.10
   4   2  -1    6.50    0.80
  -1  -4  -2    6.10    1.00
  -2  -1  -4    5.90    1.00
  -2  -1  -4    6.40    1.10
  -1   4   2    6.70    1.00
  -1  -4  -2    5.80    1.00
   1   4   2    6.50    1.00
   1  -4  -2    7.70    1.00
  -2  -1   4    6.30    0.90
  -2   1  -4    4.60    1.10
   1  -4  -2    8.00    1.10
   4  -2  -1    5.50    1.10
   2   1   4    4.30    1.00
   2  -1  -4    6.50    0.80
   2   1   4    7.30    1.00
  -2   1  -4    7.20    0.80
   4  -2  -1    8.50    0.90
  -4  -2   1    7.30    0.80
  -4   2  -1    6.70    1.00
  -4   2  -1    5.20    1.10
   1   4   2    6.50    1.00
   4   2   1    9.80    1.20
   4   2   1    6.30    1.00
  -2  -1   4    6.10    0.70
  -1   4  -2    5.10    0.50
  -1  -4   2    7.20    1.00
  -1  -4   2    5.80    0.70
   2  -1  -4    6.10    1.00
  -1   4  -2    6.80    1.10
  -4  -2   1    7.80    1.10
   4   3  -1    2.10    0.90
   4   3  -1    2.30    1.10
   4  -3   1    2.70    1.10
  -4   3   1    1.50    1.00
  -3   1   4    1.10    1.00
   4  -3   1    1.40    0.90
  -1   4   3    3.50    1.00
  -1   4   3    2.20    1.00
   3  -1   4    1.50    1.20
   3   1  -4    2.50    1.00
   1  -4   3    1.20    1.10
   1   4  -3    1.80    0.70
   1   4  -3    1.40    1.00
  -4   3   1    2.10    0.90
  -3  -1  -4    3.10    1.00
  -3  -1  -4    2.80    1.20
   3  -1   4    1.20    0.80
  -4  -3  -1    0.70    1.00
   3   1  -4    1.60    0.60
  -4  -3  -1    4.00    1.10
  -1  -4  -3    3.40    1.10
  -3   1   4    2.30    0.60
   4  -3  -1    2.50    0.90
   4  -3  -1    2.00    1.00
  -1  -4   3    3.00    1.00
  -1   4  -3    2.40    1.10
   3  -1  -4    1.50    0.60
   3  -1  -4    2.80    1.10
   1  -4  -3    2.00    1.10
  -3  -1   4    0.90    0.60
  -3   1  -4    1.30    0.80
   3   1   4    1.90    1.00
   3   1   4    2.60    1.10
  -4   3  -1    0.70    0.90
  -4   3  -1    1.50    1.10
  -3   1  -4    1.50    1.20
  -4  -3   1    2.20    1.00
  -4  -3   1    1.10    0.90
   1  -4  -3    1.30    1.00
  -1  -4   3    1.30    0.60
   1   4   3    1.40    1.10
   1   4   3    2.30    1.00
   1   4   3    1.50    1.00
  -3  -1   4    2.00    1.00
   4   3   1    2.30    1.10
   4   3   1    2.10    1.00
   2  -4   0  131.39    3.80
   2   4   0  138.79    3.90
   2   4   0  131.29    3.80
   4   0  -2  137.69    4.00
   0  -2  -4  140.49    3.90
   0  -2  -4  137.89    3.70
   2  -4   0  129.99    3.60
  -2   4   0  137.49    3.90
   0   2  -4  133.19    3.70
   0   2   4  144.89    4.00
   0   2   4  138.79    3.80
  -2   4   0  135.19    3.70
   0   2  -4  137.39    3.40
  -2  -4   0  138.79    3.80
  -4   0  -2  146.99    4.00
   4   0   2  140.59    4.00
   4   0   2  142.19    3.90
  -2  -4   0  139.79    3.90
   4   0  -2  139.39    3.30
   0  -2   4  136.29    3.40
  -4   0   2  144.89    4.10
   0  -2   4  139.69    3.80
  -2   4   1    6.70    1.00
  -2   4   1    5.30    1.00
   2   4  -1    6.50    1.00
   2  -4   1    6.90    0.80
  -4  -1  -2    6.00    1.10
  -4   1   2    6.90    0.70
  -1   2   4    6.80    1.00
  -4   1   2    7.20    1.10
   4  -1   2    6.90    1.00
   4  -1   2    6.60    1.10
  -1  -2  -4    7.00    1.10
   2   4  -1    5.40    0.90
  -4  -1  -2    7.70    1.10
   1   2  -4    6.50    0.90
   4   1  -2    6.80    1.10
   4   1  -2    7.00    0.60
   1  -2   4    6.20    0.60
   2  -4   1    7.90    1.10
   1  -2   4    7.00    1.10
   1   2  -4    6.30    0.80
   1  -2   4    6.80    0.60
  -1   2   4    6.60    0.90
  -2  -4  -1    5.30    0.90
  -2  -4  -1    5.40    1.00
  -1   2  -4    8.00    1.10
  -1  -2   4    7.80    0.90
  -4  -1   2    5.80    1.00
  -4  -1   2    5.80    0.60
   2  -4  -1    6.10    1.00
   1  -2  -4    5.10    1.00
   1  -2  -4    6.80    0.90
   2   4   1    6.60    1.00
   4  -1  -2    7.00    0.70
  -4   1  -2    7.40    1.00
  -4   1  -2    6.40    1.10
  -2   4  -1    6.80    1.10
   1   2   4    6.40    1.00
   1   2   4    7.20    1.00
   2  -4  -1    7.50    1.00
  -2  -4   1    6.20    0.90
  -2  -4   1    5.50    1.00
  -2   4  -1    7.10    0.80
   2   4   1    5.70    1.00
   4  -1  -2    6.20    1.10
  -1  -2   4    6.50    0.70
   4   1   2    5.50    1.00
   4   1   2    7.40    1.10
  -2   4   2    6.00    1.10
   2   4  -2    8.30    1.10
  -2   2   4    9.30    0.90
  -2  -4  -2    7.40    1.20
   4  -2   2    7.70    1.00
  -2  -2  -4    8.50    1.20
   2   4  -2    7.50    0.90
  -4  -2  -2    8.70    1.20
  -2   2   4    6.80    1.10
   2  -2   4    8.40    0.80
   2  -2   4    7.80    1.30
   2   2  -4    6.00    0.90
  -4   2   2    6.60    1.20
  -4   2   2    9.20    0.90
  -2  -4  -2    7.70    1.10
  -4  -2  -2    7.70    1.10
   4   2  -2    9.20    1.20
  -2   4   2    8.30    1.10
   2  -4   2    7.60    1.20
   2  -4   2    6.70    0.70
   2   2  -4    8.00    0.90
   4  -2   2    8.50    1.20
  -2  -2  -4    6.50    1.10
   4   2  -2    7.90    0.80
  -4  -2   2    8.00    1.10
  -2   4  -2    6.80    0.70
   4  -2  -2    8.90    1.20
   2  -4  -2    8.20    1.10
   2  -2  -4    7.50    0.90
  -4  -2   2    8.30    0.80
  -4   2  -2    6.40    1.00
  -4   2  -2    7.80    1.20
  -2   4  -2    9.10    1.20
   4  -2  -2    9.20    0.80
   4   2   2    7.30    1.10
  -2  -2   4    7.60    0.90
   2  -2  -4    8.60    1.20
  -2   2  -4    6.80    1.20
  -2  -2   4    7.80    0.90
  -2  -4   2    8.20    1.10
  -2   2  -4    7.80    0.80
   2   2   4    8.20    1.20
   2   4   2    8.20    1.20
   2   4   2    6.80    1.10
   2  -4  -2    5.70    1.10
   4   2   2    7.20    1.20
  -2  -4   2    7.30    0.90
   2   2   4    6.10    1.10
   2   4  -3    1.00    0.90
  -3   2   4    1.40    1.10
   4   3  -2    1.10    1.10
  -3  -2  -4    1.80    1.10
   2   4  -3    1.50    1.00
  -2   4   3    0.60    0.90
   3  -2   4    0.90    0.80
   3  -2   4    1.10    1.20
   3   2  -4    0.90    1.00
   3   2  -4    0.40    0.70
  -2   4   3    1.30    1.10
   4  -3   2    1.10    0.90
  -4   3   2    0.80    1.10
  -2  -4  -3    0.50    1.00
   2  -4   3    1.40    0.50
   2  -4   3    1.50    1.20
  -3  -2  -4    0.10    1.20
   4  -3   2    0.90    1.10
  -2  -4  -3    1.20    1.10
  -4  -3  -2    0.80    1.10
   4   3  -2    1.20    0.80
  -4  -3  -2    1.40    1.10
  -3   2   4    1.80    0.70
  -4   3   2    1.50    0.90
   3   2   4    0.00    1.10
   2  -4  -3    1.10    1.00
  -3  -2   4    0.30    0.70
   4   3   2    0.20    1.10
   2   4   3    1.20    1.10
  -4  -3   2    0.30    1.00
  -3   2  -4    0.90    0.80
   3   2   4    1.50    1.20
  -2   4  -3    0.60    0.60
  -2   4  -3    0.20    1.20
   3  -2  -4    1.60    1.10
   3  -2  -4    0.30    0.70
   4  -3  -2    0.00    1.10
  -4  -3   2    0.00    0.80
  -4   3  -2    0.60    0.90
  -2  -4   3    1.60    0.80
  -2  -4   3    1.40    1.00
   4  -3  -2    2.60    0.90
  -3  -2   4    0.20    0.90
   2   4   3    1.20    1.10
  -4   3  -2    0.10    1.10
   2  -4  -3    0.20    1.10
   4   3   2    3.00    1.20
  -3   2  -4    1.40    1.20
  -4   0  -3    0.00    0.90
   0  -3  -4    0.70    0.90
   0   3  -4    0.70    0.50
   0   3  -4    1.10    1.00
   0   3   4    0.00    0.90
  -3   4   0    0.00    1.00
   0  -3  -4    0.00    1.00
   4   0  -3    0.00    1.00
   4   0   3    0.50    0.90
   4   0   3    0.00    1.00
   3   4   0    1.10    1.00
   3   4   0    0.40    0.90
   3  -4   0    0.00    0.80
   3  -4   0    0.90    1.00
   0  -3   4    0.80    1.00
  -4   0   3    0.60    1.00
  -3  -4   0    0.10    0.90
  -3  -4   0    0.20    0.90
  -3   4   0    0.30    0.90
   0   3   4    0.00    0.90
   0  -3   4    0.90    0.50
   1  -3   4    1.60    1.10
  -3   4   1    2.40    1.00
  -3  -4  -1    1.90    1.00
  -1  -3  -4    0.70    1.00
  -3   4   1    1.40    0.90
   4   1  -3    1.60    1.10
  -4   1   3    1.90    0.50
  -4  -1  -3    2.20    1.00
  -4  -1  -3    2.00    1.10
   1   3  -4    1.90    0.70
   1   3  -4    1.90    1.00
  -1   3   4    0.30    0.90
   3   4  -1    1.60    0.90
  -1   3   4    3.40    1.00
   3  -4   1    0.70    0.80
   4  -1   3    2.40    0.90
   4  -1   3    2.10    1.20
  -4   1   3    1.50    1.10
   3  -4   1    1.00    1.00
   3   4  -1    1.30    1.00
  -3  -4  -1    1.30    1.00
  -3  -4   1    1.90    0.90
   4   1   3    3.00    1.10
   4  -1  -3    2.70    1.10
   1   3   4    2.70    1.00
   3  -4  -1    1.80    1.00
   3  -4  -1    2.70    1.00
   3   4   1    2.30    1.00
  -1  -3   4    1.90    0.70
  -1  -3   4    2.10    0.90
  -1   3  -4    1.20    1.10
   4   1   3    1.40    1.10
   1   3   4    0.80    1.00
   1  -3  -4    1.50    1.00
   1  -3  -4    1.40    0.90
  -4  -1   3    1.60    1.00
  -4   1  -3    1.90    0.90
  -4   1  -3    3.40    1.20
   3   4   1    2.20    1.10
  -3   4  -1    1.60    1.00
  -3   4  -1    1.20    0.80
  -3  -4   1    1.40    1.00
   4  -1  -3    3.10    0.50
  -3   4   2    3.40    1.10
  -2  -3  -4    1.80    1.00
   4   2  -3    1.20    0.70
   4   2  -3    0.90    1.10
  -4  -2  -3    0.70    1.00
   3  -4   2    1.30    0.80
   3  -4   2    1.90    1.20
   3   4  -2    1.00    1.00
   3   4  -2    0.90    1.00
   2   3  -4    1.40    0.90
  -4   2   3    2.40    1.10
  -4   2   3    0.70    0.70
  -3  -4  -2    1.10    1.00
   4  -2   3    1.70    0.90
   4  -2   3    1.40    1.20
  -4  -2  -3    3.20    1.20
   2  -3   4    1.30    1.20
  -3   4   2    1.50    1.00
  -3  -4  -2    1.10    1.10
  -2   3   4    0.90    1.00
  -2   3   4    1.20    0.80
  -2  -3  -4    0.70    1.10
   2   3  -4    2.00    0.90
   2  -3   4    0.30    0.60
  -2  -3   4    0.40    0.90
   2  -3  -4    2.20    1.10
   2  -3  -4    0.10    0.90
   2   3   4    1.00    1.10
   2   3   4    1.30    1.10
   3  -4  -2    2.30    1.10
   3  -4  -2    0.10    1.00
   3   4   2    0.00    1.10
  -4  -2   3    1.70    1.10
  -4  -2   3    0.60    0.60
  -4   2  -3    0.50    0.90
  -4   2  -3    1.30    1.20
   3   4   2    1.20    1.10
   4  -2  -3    0.80    1.10
   4  -2  -3    1.00    0.70
  -2   3  -4    0.70    1.10
  -3  -4   2    1.80    1.00
  -3  -4   2    2.00    1.00
  -3   4  -2    1.10    0.80
  -3   4  -2    1.70    1.10
   4   2   3    1.50    1.20
  -2   3  -4    0.80    0.60
   4   2   3    0.90    1.10
  -2  -3   4    0.00    0.80
  -4  -3  -3  244.18    6.60
  -4  -3  -3  256.17    6.50
   3  -3   4  252.57    6.50
   3   3  -4  245.68    6.30
   4  -3   3  241.78    6.10
   4  -3   3  239.68    6.50
  -4   3   3  252.27    6.60
  -4   3   3  249.48    6.00
  -3  -4  -3  243.48    6.60
  -3  -4  -3  254.77    6.50
   3  -4   3  253.07    6.50
   3   3  -4  242.68    5.90
  -3  -3  -4  248.18    6.50
   3  -3   4  241.08    5.90
   3   4  -3  241.58    6.20
   4   3  -3  240.98    6.40
   4   3  -3  243.78    5.90
  -3   3   4  245.08    6.60
  -3   3   4  243.88    6.00
   3  -4   3  243.88    5.90
   3   4  -3  244.38    6.10
  -3   4   3  245.78    6.50
  -3   4   3  249.48    6.20
   3  -4  -3  245.58    6.50
   3  -4  -3  251.27    6.20
  -3   4  -3  242.58    5.90
  -3  -4   3  235.18    6.20
   3  -3  -4  239.58    6.50
   3  -3  -4  244.98    6.00
  -3  -3   4  242.68    6.20
  -4  -3   3  242.58    6.40
  -4  -3   3  244.28    5.90
  -3  -4   3  249.68    6.10
   3   3   4  245.58    6.60
   3   3   4  247.58    6.50
  -3  -3   4  250.97    6.00
  -3   4  -3  235.58    6.40
   3   4   3  244.58    6.60
   3   4   3  241.98    6.40
   4  -3  -3  249.38    6.60
   4  -3  -3  245.88    5.90
  -4   3  -3  233.88    6.10
  -4   3  -3  258.87    6.60
  -3   3  -4  240.48    5.90
  -3   3  -4  243.68    6.50
   4   3   3  251.57    6.50
  -4  -4   0   89.99    3.30
  -4  -4   0   93.59    3.10
  -4   0  -4   90.39    3.10
  -4   0   4   94.69    3.40
  -4   4   0   93.99    3.20
  -4   4   0   94.39    3.20
   0  -4  -4   92.19    3.40
   0  -4  -4   95.29    3.30
   0  -4   4   93.39    3.20
   0   4  -4   91.39    3.30
   0   4   4   94.39    3.40
   0   4   4   93.89    3.30
   4  -4   0   95.79    3.20
   4  -4   0   96.59    3.20
   4   0  -4   94.09    3.50
   4   0   4   95.69    3.30
   4   0   4   89.39    3.30
   4   4   0   89.79    3.40
   4   4   0   92.59    3.10
  -4  -4  -1    0.00    1.10
  -4  -4  -1    0.30    1.10
   4  -4   1    0.70    1.20
   1   4  -4    0.30    1.10
  -4  -1  -4    0.00    1.10
  -4  -1  -4    0.00    1.20
   4   1  -4    0.00    1.20
   1   4  -4    0.00    0.70
   4  -4   1    0.00    1.00
  -4   1   4    0.30    1.20
   4   4  -1    0.00    1.00
   4  -1   4    0.50    1.00
  -4   4   1    0.00    1.10
  -4   4   1    0.00    1.00
  -1  -4  -4    0.20    1.20
  -1   4   4    0.00    1.00
   4   4  -1    0.20    1.20
   4  -1   4    0.00    1.30
  -1   4   4    0.00    1.20
   1  -4   4    0.00    1.20
   1  -4  -4    0.00    1.10
   1  -4  -4    0.20    1.10
  -1  -4   4    0.00    0.60
  -4   1  -4    0.90    1.00
  -4  -4   1    0.00    1.00
   1   4   4    1.20    1.10
   1   4   4    0.00    1.10
   4  -4  -1    0.00    1.10
   4  -4  -1    0.00    1.00
  -4   1  -4    0.70    1.30
  -4  -4   1    0.00    1.10
   4  -1  -4    0.80    1.20
  -4   4  -1    0.40    1.20
  -1   4  -4    0.00    1.20
  -4  -1   4    0.00    1.10
   4   1   4    0.20    1.10
   4   1   4    0.00    1.20
  -1  -4   4    0.00    1.00
  -4   4  -1    1.00    1.00
   4   4   1    0.00    1.20
   4   4   1    0.00    1.10
  -4  -4  -2  178.28    5.20
  -4  -4  -2  178.98    5.00
  -4   4   2  184.28    5.20
  -4   4   2  182.58    4.80
  -4  -2  -4  179.88    5.30
  -4  -2  -4  183.38    5.20
   2   4  -4  177.78    4.80
   4  -2   4  178.98    4.80
   4  -2   4  175.98    5.10
   4   2  -4  180.18    5.00
  -4   2   4  172.28    5.10
  -4   2   4  177.08    4.30
   4  -4   2  173.98    5.00
   4   4  -2  178.58    5.00
   2   4  -4  166.28    4.60
   4   2  -4  174.88    4.30
  -2  -4  -4  177.28    5.20
  -2  -4  -4  173.18    5.00
  -2   4   4  174.48    4.80
   4   4  -2  172.48    4.70
   4  -4   2  180.98    4.80
  -2   4   4  180.78    5.20
   2  -4   4  172.78    5.00
   2  -4  -4  179.98    5.20
   2  -4  -4  179.68    4.80
  -2  -4   4  169.98    4.60
  -4  -4   2  177.28    4.70
  -4  -2   4  168.88    4.90
   2   4   4  187.48    5.40
   2   4   4  175.28    5.00
  -2  -4   4  185.28    4.80
   4  -4  -2  178.48    4.80
  -2   4  -4  170.58    5.10
  -4   4  -2  179.08    4.80
   4  -2  -4  175.38    4.30
  -4  -2   4  182.18    4.30
  -4   2  -4  184.08    4.80
  -4   2  -4  182.58    5.30
  -4  -4   2  175.08    5.00
   4   2   4  174.58    5.20
   4   2   4  176.48    5.10
  -4   4  -2  177.88    5.20
   4  -4  -2  174.58    5.20
   4   4   2  180.18    5.30
   4   4   2  177.38    5.10
  -4  -4  -3    0.00    1.20
  -4  -4  -3    0.00    1.30
   4  -3   4    1.90    1.50
   4   3  -4    0.10    1.30
  -4  -3  -4    0.00    1.20
  -4  -3  -4    0.00    1.40
   4  -4   3    0.00    1.00
   4   4  -3    0.00    1.20
   4   4  -3    0.00    1.10
  -3  -4  -4    0.10    1.40
  -4   3   4    0.00    1.30
  -4   3   4    0.30    0.90
   3   4  -4    0.00    1.10
   4   3  -4    0.30    0.90
  -4   4   3    0.60    1.30
  -4   4   3    0.50    1.10
  -3  -4  -4    0.00    1.20
  -3   4   4    0.50    1.10
   3   4  -4    1.30    1.10
   4  -4   3    2.00    1.40
   3  -4   4    1.20    0.70
   3  -4   4    1.10    1.40
  -3   4   4    0.00    1.20
   4  -3   4    0.30    0.90
  -4   3  -4    0.10    1.40
   3  -4  -4    0.00    1.10
  -3   4  -4    0.20    0.80
  -3   4  -4    0.00    1.40
  -4   4  -3    0.60    1.00
  -3  -4   4    1.60    1.00
   3  -4  -4    0.30    1.30
   3   4   4    0.00    1.30
   4  -4  -3    0.00    1.30
   4  -4  -3    0.00    1.10
  -4  -3   4    0.00    1.20
  -3  -4   4    1.40    1.10
   4  -3  -4    0.00    1.20
   4  -3  -4    1.10    0.90
   3   4   4    0.00    1.30
  -4  -4   3    0.60    1.10
  -4  -4   3    0.00    1.10
  -4   4  -3    0.80    1.40
   4   3   4    0.30    1.40
   4   3   4    0.00    1.30
  -4  -3   4    2.60    0.90
  -4   3  -4    0.30    1.00
   4   4   3    0.00    1.40
   4   4   3    0.00    1.30
  -4  -4  -4   38.60    3.00
  -4  -4  -4   37.60    2.70
   4   4  -4   35.90    2.70
   4   4  -4   37.50    2.30
  -4   4   4   37.90    2.30
  -4   4   4   32.40    2.90
   4  -4   4   37.00    3.10
  -4   4  -4   34.90    3.00
   4  -4  -4   40.20    2.30
   4  -4  -4   41.10    2.90
  -4  -4   4   32.90    2.80
  -4   4  -4   36.50    2.10
   4   4   4   36.80    3.00
   4   4   4   37.20    2.90
   0   5   0    8.60    1.20
   1   0  -5 1745.13   39.50
  -5  -1   0 1807.12   39.70
  -5  -1   0 1795.02   39.00
  -5   1   0 1779.72   39.70
  -5   1   0 1829.92   39.00
  -1   0  -5 1794.22   39.50
  -1   0   5 1817.42   39.50
  -1   0   5 1761.02   38.90
   0  -5  -1 1786.92   39.50
   0  -5  -1 1720.13   39.20
   0  -5   1 1795.32   39.20
   0   5  -1 1717.93   39.30
   0   5  -1 1781.72   39.30
   0   5  -1 1714.53   39.20
   0   5   1 1772.32   39.50
   0   5   1 1707.03   39.20
   5   1   0 1795.02   39.00
   1   0   5 1789.02   39.50
   1   0   5 1767.02   39.20
   5  -1   0 1780.92   39.00
   2   0   5    1.20    1.10
   0   5  -2    0.00    0.70
   0   5  -2    1.30    1.10
   0   5   2    0.10    1.00
   0   5   2    0.10    1.00
   2   0  -5    0.30    1.00
   2   0   5    0.00    0.90
   0  -5  -2    0.00    1.00
   5  -2   0    0.40    1.10
   5  -2   0    0.00    1.00
   5   2   0    0.00    1.10
   5   2   0    0.00    0.90
  -2   0   5    0.60    0.90
  -2   0   5    0.00    0.80
  -5   2   0    0.20    1.00
   0  -5  -2    0.00    1.10
   0  -5   2    0.40    1.10
  -5   2   0    0.70    1.10
  -5  -2   0    0.00    1.00
  -2   0  -5    0.30    0.90
  -2   0   5    0.20    1.00
  -5  -2   0    0.50    1.10
  -3   0  -5 1031.20   23.00
  -5  -3   0  993.90   22.60
   0  -5  -3 1027.60   22.80
   0  -5   3  951.80   22.40
   0  -5   3 1027.60   22.80
  -3   0   5  987.80   22.20
  -5  -3   0 1039.20   23.20
  -5   3   0 1001.60   22.70
   0   5   3 1017.40   22.80
  -3   0   5 1033.80   23.10
  -3   0   5  990.30   22.30
   0   5  -3  944.51   22.80
   0   5   3 1039.50   23.20
   5   3   0 1015.70   22.70
   5   3   0 1014.60   23.20
  -5   3   0 1040.90   23.10
   3   0  -5 1034.50   23.10
   3   0   5 1022.10   22.90
   3   0   5  990.70   22.90
   5  -3   0  992.80   23.00
   5  -3   0 1033.40   22.70
   0  -5  -3 1044.90   23.20
   0   5  -3 1005.60   22.40
   0   5  -4    0.00    1.30
   0   5   4    0.00    1.20
   0   5   4    0.00    1.20
   0  -5   4    0.00    1.30
   0  -5  -4    0.00    1.30
  -5  -4   0    0.00    1.30
   4   0   5    0.00    1.20
   4   0   5    0.00    1.30
   5  -4   0    0.00    1.20
   4   0  -5    0.00    1.30
   5   4   0    1.50    1.40
   5   4   0    1.30    1.20
  -4   0   5    0.00    1.20
   0  -5  -4    0.30    1.30
   5  -4   0    0.50    1.20
  -4   0  -5    0.10    1.20
  -5   4   0    0.00    1.20
  -5   4   0    0.30    1.30
  -5  -4   0    0.90    1.20
   0  -1   5 1787.72   39.20
   0  -1  -5 1739.23   38.90
   0  -1  -5 1814.82   39.40
  -1   5   0 1699.53   39.00
  -1   5   0 1771.32   39.20
   0   1   5 1783.12   39.40
   0   1   5 1819.02   38.90
  -5   0  -1 1781.52   39.50
  -5   0   1 1838.52   39.60
  -1  -5   0 1710.13   39.30
  -1  -5   0 1725.03   39.00
   1  -5   0 1793.32   39.20
   0   1  -5 1771.62   39.20
   0   1  -5 1771.22   38.90
   1  -5   0 1726.03   39.00
   1   5   0 1686.43   39.30
   1   5   0 1778.32   39.10
   5   0  -1 1799.72   39.60
   5   0  -1 1797.02   38.70
   5   0   1 1768.42   39.50
   5   0   1 1765.62   38.90
   0  -1   5 1710.03   38.90
  -1  -5  -1    0.30    0.90
  -1   1   5    1.10    1.00
   1  -1   5    0.00    0.80
   1  -1   5    0.00    1.10
  -1  -1  -5    0.00    1.10
   1   1  -5    0.00    0.90
  -1   1   5    2.50    0.90
   5   1  -1    0.00    0.80
   1   5  -1    0.50    0.80
   1   5  -1    0.00    1.00
  -1   5   1    0.00    1.00
  -1  -1  -5    0.00    1.00
   1  -5   1    0.00    0.70
   5  -1   1    0.50    1.00
   5  -1   1    0.00    1.00
   5   1  -1    0.30    1.10
  -5   1   1    0.00    1.10
  -1  -5  -1    0.40    1.00
   1  -5   1    1.60    1.10
  -5  -1  -1    0.60    1.10
  -5  -1  -1    0.00    1.00
  -1   5   1    0.60    0.90
   1   1  -5    0.00    0.80
  -5   1   1    1.10    0.90
   1  -5  -1    0.60    1.00
   1   5   1    1.40    1.00
   1   1   5    0.00    0.90
   5   1   1    0.60    1.10
   1  -1  -5    0.20    0.90
   1  -5  -1    1.30    1.00
  -1  -5   1    0.00    1.00
  -1   5  -1    0.90    0.70
  -1   5  -1    0.00    1.00
  -5  -1   1    0.00    1.00
  -5  -1   1    0.60    0.80
  -5   1  -1    0.30    1.00
  -5   1  -1    0.10    1.10
  -1  -5   1    0.10    0.80
   1   5   1    0.00    1.00
   5  -1  -1    0.00    1.10
   1  -1  -5    0.00    1.00
  -1  -1   5    0.60    0.80
  -1  -1   5    0.00    0.90
  -1   1  -5    0.00    0.80
   1   1   5    0.00    1.00
  -1   1  -5    0.00    1.10
   5   1   1    1.10    1.00
   5  -1  -1    0.00    0.80
   1   5  -2   37.80    1.80
  -5   2   1   35.00    2.00
  -2  -1  -5   38.10    2.30
  -2  -1  -5   34.00    2.20
   1   5  -2   32.90    2.30
   5   2  -1   37.90    1.90
   2  -1   5   37.50    2.40
   2   1  -5   32.70    2.00
   2   1  -5   37.00    1.80
   1  -5   2   36.80    1.50
   1  -5   2   43.30    2.30
  -2   1   5   38.70    2.20
  -5   2   1   35.60    2.40
   5  -2   1   32.90    2.20
   2  -1   5   38.90    2.00
  -5  -2  -1   40.90    2.60
  -5  -2  -1   38.50    2.30
   5   2  -1   38.80    2.60
   5  -2   1   38.10    2.20
  -2   1   5   35.80    1.70
  -1   5   2   39.30    2.40
  -1   5   2   38.70    2.30
  -1  -5  -2   34.30    2.40
   1  -5  -2   38.50    2.30
   5  -2  -1   36.70    1.90
   1   5   2   36.10    2.30
   5   2   1   39.70    2.20
  -5  -2   1   36.70    2.50
  -5  -2   1   36.10    1.90
   5   2   1   35.80    2.40
   2   1   5   37.20    2.30
   5  -2  -1   36.40    2.30
  -1  -5   2   33.70    1.80
  -1  -5   2   37.60    2.30
  -1   5  -2   36.10    1.50
  -1   5  -2   39.50    2.40
  -2  -1   5   38.50    1.80
  -2   1  -5   36.90    2.00
  -2   1  -5   37.10    2.30
  -5   2  -1   45.20    2.30
  -5   2  -1   38.30    2.40
   2  -1  -5   38.00    1.80
   1   5   2   35.10    2.40
   2  -1  -5   34.00    2.30
  -2  -1   5   35.20    2.00
   2   1   5   38.30    2.30
   1  -5  -2   41.70    2.40
   5  -3   1    0.40    1.20
   5  -3   1    1.90    1.20
   5   3  -1    1.30    1.30
   5   3  -1    1.00    1.00
  -3   1   5    0.40    1.20
   1   5  -3    1.30    0.80
   1   5  -3    0.60    1.20
   3  -1   5    0.90    1.40
   3  -1   5    0.00    0.90
   1  -5   3    1.70    1.30
  -5  -3  -1    1.80    1.20
  -3   1   5    0.00    0.70
  -1  -5  -3    0.00    1.20
  -5   3   1    0.40    1.20
  -5   3   1    1.00    1.10
  -3  -1  -5    1.10    1.10
  -5  -3  -1    0.00    1.20
  -1   5   3    2.40    1.20
  -1   5   3    2.20    1.20
  -3  -1  -5    0.70    1.30
   3   1  -5    0.30    1.10
   3   1  -5    1.30    0.80
   3  -1  -5    0.00    1.20
   3  -1  -5    0.00    0.80
   1   5   3    0.00    1.20
   1   5   3    2.00    1.30
  -5  -3   1    1.50    1.00
   5   3   1    0.00    1.20
   1  -5  -3    1.20    1.20
   1  -5  -3    0.30    1.20
  -5  -3   1    1.10    1.20
  -1   5  -3    0.10    1.20
  -5   3  -1    1.30    1.10
  -5   3  -1    0.60    1.20
  -1  -5   3    0.20    0.70
  -3  -1   5    0.90    1.10
  -3  -1   5    0.70    0.80
   5   3   1    1.80    1.20
   5  -3  -1    1.60    1.10
  -1  -5   3    2.20    1.20
  -3   1  -5    1.00    1.00
  -3   1  -5    1.60    1.40
   1   5   3    0.10    1.20
   3   1   5    2.30    1.20
   3   1   5    0.00    1.20
   5  -3  -1    0.00    1.20
   5   4  -1    1.10    1.20
  -5   4   1    3.10    1.30
  -1   5   4    0.00    1.20
  -4  -1  -5    0.80    1.50
  -5   4   1    2.60    1.30
   4   1  -5    2.30    1.40
  -1   5   4    0.00    1.30
  -4  -1  -5    2.10    1.30
   4  -1   5    1.80    1.10
  -5  -4  -1    0.30    1.30
   5  -4   1    1.80    1.30
   1   5  -4    1.50    1.30
   5   4  -1    1.90    1.40
   4  -1   5    0.70    1.50
   1   5  -4    2.40    0.80
  -4   1   5    1.20    1.30
   1  -5   4    2.40    1.40
  -1  -5  -4    1.20    1.30
   5  -4   1    1.40    1.40
  -5  -4  -1    0.00    1.30
  -4   1   5    3.00    0.70
   5   4   1    1.10    1.40
   4  -1  -5    0.00    1.40
  -4  -1   5    1.30    1.30
  -5   4  -1    1.30    1.30
   4   1   5    2.10    1.40
  -5  -4   1    0.50    1.30
  -4   1  -5    0.60    1.50
   1   5   4    0.40    1.40
  -1  -5   4    0.90    1.30
   5  -4  -1    2.50    1.20
  -4   1  -5    1.50    1.10
  -1   5  -4    1.30    1.40
   5   4   1    1.40    1.30
  -5   4  -1    2.20    1.20
   1  -5  -4    1.90    1.40
   1   5   4    0.00    1.30
   1   5   4    1.50    1.40
  -5  -4   1    1.40    1.20
   5  -4  -1    2.10    1.40
   1  -5  -4    1.70    1.30
   4  -1  -5    1.20    0.70
  -1  -5   4    2.30    0.70
   4   1   5    0.90    1.30
  -2  -5   0    0.20    0.90
   5   0  -2    0.00    0.70
  -2  -5   0    0.00    1.10
  -5   0  -2    0.70    1.00
   5   0   2    0.70    1.10
   5   0  -2    0.20    1.20
   0  -2   5    0.00    0.70
   0  -2   5    0.00    1.00
   5   0  -2    0.00    0.70
   2  -5   0    0.00    0.90
   2  -5   0    0.00    1.10
   2   5   0    0.00    0.90
   2   5   0    0.30    1.00
   0   2  -5    0.20    0.70
  -2   5   0    1.10    1.10
   0   2  -5    0.00    1.10
   0   2   5    0.50    1.00
   5   0   2    0.50    1.10
   0   2   5    0.00    1.00
   0  -2  -5    0.00    1.00
  -2   5   0    0.00    0.90
   0  -2  -5    0.00    1.00
  -5   0   2    0.50    1.10
   2  -5   1   35.10    1.80
  -2   5   1   38.10    2.20
   5  -1   2   35.50    2.50
  -1   2   5   34.20    2.20
  -1   2   5   39.40    1.90
  -1  -2  -5   35.20    2.10
   2   5  -1   35.10    2.20
   5  -1   2   37.80    2.40
   2  -5   1   41.30    2.40
   1   2  -5   39.20    1.90
   1  -2   5   39.10    1.70
   5   1  -2   38.20    2.40
   2   5  -1   35.60    2.30
  -1  -2  -5   35.90    2.40
  -2  -5  -1   38.70    2.30
  -5  -1  -2   37.30    2.40
  -5   1   2   37.60    2.50
  -5   1   2   36.70    1.70
  -2  -5  -1   35.20    2.20
  -5  -1  -2   39.40    2.60
  -2   5   1   35.00    2.30
   1  -2   5   34.40    2.30
   5   1  -2   33.60    1.50
   1   2  -5   36.10    2.00
  -5   1  -2   36.10    2.40
   1  -2  -5   38.90    2.00
  -2   5  -1   37.40    1.80
  -5  -1   2   39.40    2.50
  -2  -5   1   34.30    2.10
   2  -5  -1   39.30    2.20
  -2  -5   1   36.20    2.40
   1   2   5   38.90    2.30
   1   2   5   37.80    2.30
   2  -5  -1   38.00    2.20
  -5  -1   2   37.20    1.60
   5  -1  -2   36.30    2.40
   5  -1  -2   36.90    1.60
  -1  -2   5   33.50    2.00
  -1   2  -5   38.30    2.40
  -2   5  -1   35.50    2.30
  -5   1  -2   37.50    2.40
   2   5   1   35.80    2.40
   1  -2  -5   35.10    2.30
  -1  -2   5   36.80    1.80
   2   5   1   33.60    2.40
   5   1   2   37.20    2.30
   5   1   2   37.80    2.40
   2  -2   5    1.90    0.80
  -5  -2  -2    1.40    1.20
  -2  -5  -2    0.00    1.20
   5  -2   2    0.60    1.20
  -5   2   2    0.00    1.10
   2   2  -5    0.00    0.90
   2   2  -5    0.40    0.90
   2   5  -2    0.30    1.00
  -2  -5  -2    0.00    1.00
   5  -2   2    0.00    1.10
  -5  -2  -2    0.00    1.10
   5   2  -2    0.40    1.20
   5   2  -2    0.50    0.80
   2  -2   5    0.80    1.30
  -5   2   2    0.30    0.90
  -2  -2  -5    0.00    1.20
  -2   2   5    0.70    1.10
  -2   2   5    1.70    0.90
   2   5  -2    0.20    1.10
   2  -5   2    0.00    1.20
  -2   5   2    0.90    1.10
  -2   5   2    0.00    1.10
  -2  -2  -5    0.10    1.10
   2  -5   2    0.00    0.70
   2  -5  -2    0.00    1.10
  -2   5  -2    0.00    1.20
   2  -5  -2    0.80    1.10
   2  -2  -5    0.60    0.90
  -5  -2   2    0.00    1.10
  -2   5  -2    0.40    0.70
  -5   2  -2    0.00    1.00
  -2  -5   2    0.60    0.90
   5  -2  -2    0.00    1.20
   5  -2  -2    0.00    0.80
   5   2   2    0.00    1.20
   5   2   2    0.00    1.10
   2   5   2    0.00    1.10
  -2  -5   2    0.80    1.10
   2  -2  -5    0.40    1.20
   2   2   5    0.00    1.10
  -2  -2   5    0.00    0.90
  -5   2  -2    0.80    1.20
  -2   2  -5    1.10    0.80
  -2   2  -5    0.80    1.30
   2   2   5    1.20    1.20
  -2  -2   5    1.10    0.90
   2   5   2    0.00    1.10
  -5  -2   2    0.00    0.80
   3  -2   5   45.90    2.10
   3  -2   5   47.40    2.70
   5  -3   2   49.00    2.70
   2  -5   3   48.10    2.90
  -5  -3  -2   49.80    2.90
  -5  -3  -2   51.19    2.70
  -2   5   3   47.80    2.60
  -3   2   5   48.90    2.00
  -3   2   5   49.90    2.80
   2  -5   3   43.90    1.70
   5   3  -2   45.40    2.90
  -2   5   3   48.40    2.70
   3   2  -5   46.50    2.40
   3   2  -5   49.60    2.00
   5  -3   2   44.20    2.40
  -5   3   2   47.40    2.20
  -3  -2  -5   50.69    2.80
  -5   3   2   51.09    3.00
   2   5  -3   47.80    2.10
   2   5  -3   50.49    2.60
  -2  -5  -3   48.70    2.80
  -2  -5  -3   44.90    2.60
  -3  -2  -5   48.40    2.70
   5   3  -2   45.40    2.20
  -2   5  -3   46.60    1.70
  -2  -5   3   49.00    2.50
   3  -2  -5   50.79    2.10
  -5  -3   2   47.90    2.90
   2  -5  -3   48.70    2.80
   2  -5  -3   46.40    2.70
   5   3   2   47.50    2.70
   3   2   5   49.60    2.90
   5  -3  -2   47.30    2.70
   3   2   5   48.10    2.70
  -3  -2   5   46.40    2.40
  -3  -2   5   45.20    1.90
  -3   2  -5   53.19    2.30
  -3   2  -5   42.20    2.60
  -5   3  -2   44.50    2.50
   2   5   3   47.20    2.70
  -5  -3   2   47.70    2.20
  -2   5  -3   49.00    2.80
   5   3   2   53.19    2.90
  -2  -5   3   45.50    2.10
  -5   3  -2   48.80    2.80
   5  -3  -2   47.10    2.20
   2   5   3   50.19    2.90
   3  -2  -5   47.70    2.90
   5   4  -2  125.89    3.80
  -5  -4  -2  123.99    4.20
   2  -5   4  128.39    4.40
  -4  -2  -5  125.29    4.40
  -4   2   5  131.89    4.50
  -4   2   5  129.59    3.40
  -2  -5  -4  126.99    4.40
  -2  -5  -4  122.69    4.20
   5   4  -2  123.99    4.20
   5  -4   2  128.49    4.00
   2   5  -4  124.19    3.70
   2   5  -4  134.19    4.10
   4   2  -5  127.59    3.40
  -2   5   4  128.49    4.30
  -2   5   4  125.69    4.00
  -5   4   2  128.09    3.80
   4  -2   5  123.49    3.80
   4  -2   5  131.89    4.60
  -5   4   2  132.49    4.50
   5  -4   2  131.19    4.30
   4   2  -5  125.99    4.20
  -5  -4  -2  128.99    4.50
  -4  -2  -5  133.69    4.60
  -2  -5   4  124.19    3.60
  -4   2  -5  121.19    4.40
   5   4   2  129.39    4.50
  -4  -2   5  129.29    4.20
   5  -4  -2  136.29    4.50
  -2   5  -4  125.19    4.30
   5   4   2  129.99    4.30
   4  -2  -5  131.69    4.40
   4  -2  -5  121.79    3.40
  -5   4  -2  124.29    4.00
  -5   4  -2  122.29    4.20
  -4  -2   5  125.19    3.30
  -4   2  -5  133.79    4.00
   2  -5  -4  132.79    4.50
   2  -5  -4  129.79    4.10
   2   5   4  119.49    4.20
  -5  -4   2  130.39    4.40
  -2  -5   4  126.19    4.00
   4   2   5  128.79    4.30
   4   2   5  126.69    4.30
  -5  -4   2  128.89    3.90
   2   5   4  125.39    4.50
   5  -4  -2  125.99    3.90
  -3   5   0 1023.90   22.90
  -5   0  -3 1038.70   23.20
  -5   0   3 1032.40   23.30
  -3  -5   0 1019.60   22.90
   0  -3   5  958.30   22.60
   0   3   5 1047.80   22.90
   3  -5   0  992.90   23.00
   3  -5   0 1043.30   22.90
   3   5   0 1029.20   23.20
   3   5   0  984.60   22.90
   5   0   3 1040.90   23.20
  -3  -5   0 1017.60   23.10
   0  -3  -5  999.90   22.80
  -3   5   0 1020.50   23.00
   0  -3   5 1023.10   22.80
   0   3  -5  994.40   22.60
   0   3  -5  994.90   22.80
   0   3   5 1024.10   23.20
   5   0   3 1031.70   23.00
   1  -3   5    2.60    0.70
  -5   1   3    1.90    0.70
  -1  -3  -5    0.50    1.20
  -1  -3  -5    0.90    1.20
   5   1  -3    1.40    0.60
  -5  -1  -3    0.00    1.10
   5  -1   3    1.30    1.10
  -1   3   5    1.60    1.20
  -3  -5  -1    2.40    1.10
   3  -5   1    2.10    1.00
  -3   5   1    0.90    1.10
  -3   5   1    2.10    1.20
  -5   1   3    0.80    1.20
   1   3  -5    0.00    1.10
  -3  -5  -1    0.70    1.20
   3  -5   1    1.30    1.20
   3   5  -1    0.60    1.10
   1   3  -5    1.20    0.80
  -5  -1  -3    0.90    1.30
   1  -3   5    0.70    0.60
   3   5  -1    1.40    1.10
  -1   3   5    0.10    1.00
   1  -3   5    0.00    1.30
   5  -1   3    1.20    1.40
   5   1  -3    0.00    1.30
   1   3   5    1.60    1.20
  -1  -3   5    0.30    1.10
   5   1   3    0.00    1.20
   3  -5  -1    0.00    1.10
  -5  -1   3    0.90    1.20
  -3   5  -1    1.10    1.00
  -3  -5   1    1.60    1.10
  -3   5  -1    0.40    1.20
   3   5   1    0.70    1.20
   3   5   1    0.00    1.10
   5  -1  -3    1.50    1.30
   5  -1  -3    2.20    0.60
  -5   1  -3    2.30    1.40
   1   3   5    1.10    1.20
   1  -3  -5    1.10    1.20
  -1  -3   5    1.10    0.80
   5   1   3    1.70    1.20
  -1   3  -5    2.20    1.30
   3  -5  -1    0.60    1.10
  -3  -5   1    1.00    1.20
   1  -3  -5    1.10    1.10
  -5  -1   3    1.40    0.60
  -5   1  -3    1.10    1.10
  -5  -2  -3   47.50    2.60
   2  -3   5   47.90    2.80
   3  -5   2   50.99    2.80
   2  -3   5   48.10    1.90
  -3  -5  -2   45.80    2.70
  -5   2   3   50.59    2.80
   5  -2   3   52.29    2.60
  -2   3   5   50.49    2.80
  -2   3   5   49.20    2.30
  -3   5   2   50.09    2.80
  -3   5   2   48.80    2.70
  -2  -3  -5   48.60    2.80
  -2  -3  -5   47.80    2.80
   2   3  -5   45.00    2.20
   2   3  -5   49.10    2.30
   3   5  -2   46.80    2.60
  -5  -2  -3   51.99    2.80
   3  -5   2   45.90    2.10
   5  -2   3   50.69    2.90
   5   2  -3   48.30    2.70
   5   2  -3   49.00    1.90
   3   5  -2   49.90    2.70
  -3  -5  -2   44.00    2.80
  -5   2   3   49.60    1.90
  -5  -2   3   47.30    1.80
  -5  -2   3   45.90    2.70
  -3  -5   2   52.19    2.60
   5   2   3   47.00    2.70
   3  -5  -2   50.39    2.60
  -3  -5   2   47.30    2.40
  -2  -3   5   48.00    2.20
  -2  -3   5   49.10    2.20
   5  -2  -3   50.39    1.90
  -3   5  -2   42.60    2.00
  -3   5  -2   45.30    2.60
   2  -3  -5   50.69    2.70
   2  -3  -5   47.20    2.40
   3   5   2   49.10    2.80
   3   5   2   44.70    2.70
   5   2   3   50.99    2.90
   5  -2  -3   51.29    2.90
  -2   3  -5   49.70    1.90
   2   3   5   52.69    2.90
   3  -5  -2   48.70    2.80
   2   3   5   49.60    3.10
  -5   2  -3   47.80    2.80
  -5   2  -3   50.89    2.70
  -2   3  -5   49.20    2.90
   3  -3   5    0.00    0.80
   3  -5   3    0.40    1.40
  -3   5   3    0.70    1.30
   5   3  -3    0.00    0.90
  -3   3   5    0.10    1.00
   3   5  -3    0.00    1.20
   5  -3   3    0.60    1.10
  -5   3   3    0.70    1.40
  -5   3   3    0.90    1.00
  -3  -5  -3    0.40    1.20
   3  -5   3    0.40    0.80
   3   5  -3    0.50    1.20
   3   3  -5    0.80    1.00
  -3  -3  -5    0.00    1.20
  -3  -3  -5    0.00    1.40
  -3  -5  -3    0.00    1.30
   5  -3   3    0.00    1.40
   5   3  -3    1.00    1.40
  -5  -3  -3    0.00    1.30
  -3   3   5    0.00    1.30
  -5  -3  -3    0.00    1.30
   3   3  -5    0.00    1.20
   3  -3   5    2.90    1.50
  -3   5   3    0.20    1.20
  -3   5  -3    0.00    0.90
   3   3   5    0.60    1.40
  -5  -3   3    0.00    0.90
  -3  -5   3    0.00    1.00
   3  -3  -5    0.00    1.00
   3   5   3    0.00    1.40
  -3  -3   5    0.00    1.10
  -5  -3   3    0.00    1.20
   3  -5  -3    0.00    1.20
  -5   3  -3    0.00    1.10
  -3   3  -5    0.00    1.40
  -3  -5   3    1.00    1.20
   3   3   5    0.00    1.40
   5   3   3    0.00    1.40
   3  -5  -3    0.00    1.30
   5   3   3    0.00    1.40
   3   5   3    0.00    1.30
   5  -3  -3    1.50    1.40
   5  -3  -3    0.00    1.00
  -5   3  -3    0.00    1.40
  -3  -3   5    0.60    1.00
   3  -3  -5    0.40    1.30
  -3   5  -3    0.00    1.40
  -3   3  -5    0.00    0.90
  -3  -5  -4   13.70    1.80
   3   5  -4   10.30    1.50
   5   4  -3   13.00    1.30
  -4   3   5   12.70    1.70
  -4  -3  -5   13.40    1.90
  -5   4   3   14.80    1.40
   4  -3   5   14.10    1.30
   4  -3   5   12.10    1.80
   4   3  -5   10.70    1.60
   4   3  -5   13.50    1.20
  -3   5   4   11.30    1.50
   3   5  -4   12.30    1.40
  -5   4   3   10.80    1.70
  -4   3   5   13.90    1.20
   5  -4   3   12.40    1.40
  -3  -5  -4   12.70    1.70
  -5  -4  -3   13.80    1.70
  -5  -4  -3   13.50    1.80
   5  -4   3   12.80    1.80
   3  -5   4   14.40    1.80
  -4  -3  -5   15.60    1.70
   5   4  -3   10.50    1.70
   3  -5   4   12.20    1.00
  -3   5   4   12.50    1.70
   4  -3  -5    9.40    1.70
   4   3   5   12.50    1.80
  -3  -5   4   13.50    1.50
  -3  -5   4   12.90    1.30
  -4  -3   5   13.10    1.60
   5   4   3   13.40    1.80
  -5   4  -3   12.60    1.40
   3   5   4   12.80    1.70
   5  -4  -3   14.10    1.80
   5  -4  -3   13.90    1.40
  -5  -4   3   13.20    1.30
  -3   5  -4   11.90    1.00
  -3   5  -4   13.00    1.80
  -4  -3   5   14.60    1.20
   4   3   5   16.00    1.80
   3  -5  -4   11.80    1.70
   3  -5  -4   14.50    1.60
   4  -3  -5   13.80    1.20
  -5  -4   3   10.40    1.60
   3   5   4   10.70    1.80
   5   4   3   10.90    1.70
  -4   3  -5   12.30    1.30
  -4   3  -5   11.20    1.90
  -5   4  -3   13.10    1.80
   0   4  -5    0.00    0.60
   0   4   5    0.00    1.20
  -5   0   4    0.00    1.30
   0   4  -5    0.10    1.30
   4  -5   0    0.30    1.30
   4   5   0    0.00    1.30
  -4   5   0    0.00    1.30
   0  -4  -5    0.30    1.30
   0  -4  -5    0.00    1.20
   0  -4   5    1.80    0.60
   0  -4   5    0.10    1.30
   0   4   5    0.00    1.20
  -4  -5   0    0.00    1.20
  -4   5   0    0.00    1.20
  -5   0  -4    0.60    1.20
   4   5   0    0.30    1.20
   5   0  -4    1.70    1.40
   5   0   4    0.00    1.20
   5   0   4    2.40    1.50
   4  -5   0    0.00    1.20
  -4  -5   0    0.00    1.20
   1  -4   5    3.80    1.40
   1   4  -5    1.10    0.80
   1   4  -5    2.60    1.30
  -1   4   5    2.50    1.40
  -1   4   5    0.40    1.20
  -4   5   1    0.10    1.20
   5   1  -4    2.60    1.40
   4  -5   1    2.00    1.20
   4  -5   1    0.00    1.30
   4   5  -1    1.50    1.40
   4   5  -1    0.30    1.20
  -5  -1  -4    2.50    1.30
  -1  -4  -5    3.60    1.40
  -1  -4  -5    0.40    1.30
  -4  -5  -1    0.30    1.30
   5  -1   4    2.90    1.30
   5  -1   4    4.30    1.60
  -5  -1  -4    0.70    1.50
  -4   5   1    0.00    1.30
  -5   1   4    0.60    1.30
  -4  -5  -1    1.20    1.30
  -1  -4   5    0.90    0.80
   4  -5  -1    2.50    1.30
  -1   4  -5    1.40    1.40
   1   4   5    3.10    1.30
   1   4   5    1.40    1.30
   5  -1  -4    1.20    1.40
   1  -4  -5    1.30    1.20
   4  -5  -1    0.50    1.30
  -5  -1   4    0.10    1.30
  -5   1  -4    1.90    1.60
  -1  -4   5    3.20    1.20
   5   1   4    1.30    1.30
   5   1   4    3.20    1.50
  -4  -5   1    0.40    1.20
   1  -4  -5    0.60    1.30
  -4   5  -1    2.30    1.20
  -4   5  -1    3.50    1.40
  -5   1  -4    1.90    1.20
   4   5   1    2.80    1.40
   4   5   1    1.70    1.30
  -4  -5   1    2.10    1.30
  -5  -2  -4  136.19    4.50
  -5   2   4  132.69    4.50
  -5   2   4  125.09    3.30
  -4  -5  -2  125.69    4.40
  -4  -5  -2  128.09    4.20
  -5  -2  -4  128.19    4.40
   2   4  -5  120.59    3.70
   4  -5   2  131.19    3.80
   5  -2   4  124.59    3.90
  -4   5   2  125.29    4.30
  -4   5   2  130.19    4.00
  -2  -4  -5  126.69    4.30
   2   4  -5  128.99    4.00
   4  -5   2  125.59    4.30
   4   5  -2  126.59    4.20
   4   5  -2  126.99    4.10
  -2   4   5  126.29    4.40
  -2   4   5  122.69    3.90
   5   2  -4  131.19    3.30
   5  -2   4  132.49    4.60
   2  -4   5  114.59    3.20
   2  -4   5  136.89    4.40
   5   2  -4  127.19    4.30
  -2  -4   5  124.19    3.70
   2   4   5  128.39    4.50
   2  -4  -5  131.09    3.90
   4  -5  -2  134.99    4.40
   4  -5  -2  127.29    4.10
  -4   5  -2  128.09    3.80
  -2  -4   5  127.09    3.90
  -2   4  -5  120.99    3.20
  -2   4  -5  134.79    4.50
   4   5   2  123.09    4.40
   4   5   2  131.59    4.40
   5  -2  -4  128.19    4.40
   5  -2  -4  128.39    3.40
  -4   5  -2  127.39    4.40
   2   4   5  126.49    4.20
  -4  -5   2  131.89    4.00
   2  -4  -5  124.29    4.40
   5   2   4  127.19    4.50
   5   2   4  127.29    4.30
  -4  -5   2  125.89    4.10
  -5  -2   4  128.29    3.30
  -5  -2   4  130.99    4.40
  -5   2  -4  127.09    4.60
  -5   2  -4  138.99    4.20
  -4  -5  -3   11.80    1.60
  -5   3   4   13.20    1.20
   5   3  -4   13.00    1.20
   5   3  -4   11.90    1.70
   5  -3   4   14.80    1.90
   4  -5   3   14.90    1.90
  -4   5   3   14.60    1.70
  -4   5   3   12.70    1.50
  -3   4   5   12.80    1.70
  -3   4   5   13.10    1.40
  -4  -5  -3   11.30    1.70
   4   5  -3   13.50    1.50
   3  -4   5   11.90    1.00
   3  -4   5   11.70    1.80
   3   4  -5   12.60    1.40
   3   4  -5   12.70    1.40
   5  -3   4   11.80    1.40
  -3  -4  -5   11.30    1.60
  -3  -4  -5   13.20    1.80
  -5   3   4   13.70    1.70
   4  -5   3   13.30    1.30
  -5  -3  -4   12.00    1.70
   4   5  -3   13.70    1.60
  -5  -3  -4   13.10    1.90
   3  -4  -5   14.10    1.50
   4   5   3   11.40    1.70
   5  -3  -4   13.10    1.80
   5  -3  -4   13.00    1.20
   3   4   5   15.10    1.80
  -3  -4   5   11.90    1.40
   4   5   3   10.40    1.80
  -5  -3   4   14.20    1.70
  -5  -3   4   13.90    1.20
  -5   3  -4   13.50    1.50
  -5   3  -4   14.90    1.90
   4  -5  -3   13.60    1.60
   5   3   4   14.80    1.80
   5   3   4   11.60    1.80
   3  -4  -5   12.70    1.80
  -4  -5   3   12.00    1.50
  -4  -5   3   12.00    1.50
  -4   5  -3   11.80    1.30
  -4   5  -3   13.00    1.80
  -3   4  -5   11.70    1.00
  -3   4  -5   11.90    1.80
   3   4   5   12.00    1.80
   4  -5  -3   13.00    1.70
  -3  -4   5   10.90    1.30
  -5  -4  -4    0.00    1.40
  -5  -4  -4    2.90    1.70
   4  -4   5    0.60    1.00
   4  -4   5    0.00    1.60
   4   4  -5    1.10    1.40
   5  -4   4    1.00    1.20
  -5   4   4    0.70    1.50
  -5   4   4    0.00    1.20
  -4  -5  -4    0.00    1.40
  -4  -5  -4    0.20    1.60
   4  -5   4    0.00    1.00
   4  -5   4    0.00    1.60
  -4  -4  -5    1.10    1.50
  -4  -4  -5    0.00    1.60
  -4   5   4    0.30    1.50
   5  -4   4    0.00    1.70
   5   4  -4    0.80    1.50
   5   4  -4    0.40    1.20
  -4   4   5    0.00    1.50
  -4   4   5    0.00    1.10
   4   5  -4    0.00    1.40
   4   5  -4    0.00    1.30
   4   4  -5    0.00    1.20
  -4   5   4    0.00    1.30
   4  -5  -4    0.00    1.50
  -4  -4   5    0.40    1.30
  -4  -5   4    0.00    1.20
  -4  -5   4    1.40    1.30
   4  -4  -5    0.00    1.50
   4  -4  -5    0.00    1.20
  -5  -4   4    0.30    1.40
  -5  -4   4    2.70    1.20
  -5   4  -4    0.00    1.20
   4  -5  -4    0.00    1.30
   4   4   5    0.10    1.60
   4   4   5    0.00    1.60
  -4   5  -4    0.00    1.00
  -4   5  -4    0.00    1.60
   4   5   4    0.00    1.60
   4   5   4    0.00    1.50
   5  -4  -4    0.00    1.50
   5  -4  -4    0.50    1.20
  -5   4  -4    2.40    1.70
  -4  -4   5    0.80    1.10
  -4   4  -5    0.80    1.10
  -4   4  -5    0.00    1.60
   5   4   4    0.10    1.60
   5   4   4    0.00    1.60
  -5  -5   0 4755.32  109.29
  -5  -5   0 4872.71  107.99
  -5   0  -5 5091.59  110.09
  -5   0   5 4947.21  109.39
  -5   5   0 4998.60  109.19
  -5   5   0 4986.50  108.09
   0  -5  -5 4938.51  110.69
   0  -5  -5 4661.53  108.39
   0  -5   5 4966.20  108.09
   0   5  -5 4959.20  108.09
   0   5   5 4933.81  109.39
   0   5   5 4976.20  108.09
   5  -5   0 4937.01  109.49
   5  -5   0 5040.20  108.79
   5   0  -5 5129.49  109.89
   5   0   5 4973.30  109.69
   5   0   5 4829.92  108.19
   5   5   0 4944.81  109.29
   5   5   0 4932.81  107.99
  -5  -5  -1    0.00    1.40
  -5  -5  -1    0.00    1.40
   5  -5   1    0.80    1.50
   1   5  -5    0.60    1.40
  -5  -1  -5    0.00    1.40
  -5  -1  -5    0.00    1.60
   5   1  -5    1.20    1.50
   1   5  -5    0.80    0.90
   5  -5   1    0.00    1.30
  -5   1   5    0.40    1.50
   5   5  -1    0.00    1.30
   5  -1   5    1.10    1.30
  -5   5   1    0.00    1.30
  -5   5   1    1.10    1.40
  -1  -5  -5    1.10    1.40
  -1   5   5    0.00    1.30
   5   5  -1    0.00    1.50
   5  -1   5    0.00    1.70
  -1   5   5    0.00    1.40
   1  -5   5    0.80    1.50
   1  -5  -5    0.00    1.50
   1  -5  -5    0.30    1.40
  -1  -5   5    0.00    0.80
  -5   1  -5    0.00    1.30
  -5  -5   1    0.00    1.30
   1   5   5    0.00    1.40
   1   5   5    1.40    1.50
   5  -5  -1    0.00    1.40
   5  -5  -1    0.40    1.30
  -5   1  -5    0.00    1.70
  -5  -5   1    0.00    1.30
   5  -1  -5    0.00    1.50
  -5   5  -1    0.70    1.50
  -1   5  -5    0.00    1.40
  -5  -1   5    1.30    1.40
   5   1   5    0.00    1.40
   5   1   5    0.00    1.50
  -1  -5   5    0.10    1.30
  -5   5  -1    0.00    1.30
   5   5   1    0.00    1.50
   5   5   1    0.50    1.40
  -5  -5  -2 1524.25   34.60
  -5  -5  -2 1544.25   34.20
  -5   5   2 1509.95   34.50
   5  -5   2 1540.65   34.20
  -5  -2  -5 1547.75   34.60
  -5  -2  -5 1567.54   34.30
   5   2  -5 1553.84   33.40
   5  -2   5 1544.55   34.20
   5  -2   5 1548.05   34.30
   5   2  -5 1463.25   34.40
  -5   2   5 1515.15   34.60
  -5   2   5 1560.94   33.40
   2  -5   5 1451.65   34.20
   5   5  -2 1537.65   34.50
   2   5  -5 1477.25   33.90
  -5   5   2 1514.85   33.90
  -2  -5  -5 1494.25   34.20
   2   5  -5 1472.15   33.90
   5  -5   2 1529.95   34.20
   5   5  -2 1504.05   33.90
  -2   5   5 1542.35   34.70
  -2   5   5 1522.75   33.90
   2  -5  -5 1546.85   34.70
   2  -5  -5 1515.65   33.90
  -2  -5   5 1543.25   33.90
  -5  -2   5 1476.55   34.50
  -5  -5   2 1440.26   34.40
   2   5   5 1534.15   34.70
   2   5   5 1559.24   34.20
   5  -5  -2 1498.75   34.50
  -2   5  -5 1519.75   34.20
  -5  -5   2 1515.35   33.90
  -5   5  -2 1530.25   34.20
   5  -2  -5 1547.75   34.70
   5  -2  -5 1516.85   33.40
  -5  -2   5 1557.74   33.40
  -5   2  -5 1557.34   34.30
  -5   2  -5 1537.25   34.40
  -2  -5   5 1483.75   33.90
   5   2   5 1598.14   34.70
   5   2   5 1548.55   34.30
  -5   5  -2 1463.05   34.20
   5  -5  -2 1574.14   34.00
   5   5   2 1539.15   34.70
   5   5   2 1540.35   34.20
  -5  -5  -3    0.00    1.50
  -5  -5  -3    0.70    1.60
   5  -3   5    0.00    1.70
   5   3  -5    0.00    1.50
  -5  -3  -5    0.00    1.40
  -5  -3  -5    0.00    1.70
   5  -5   3    2.20    1.30
   5   5  -3    0.00    1.50
   5   5  -3    0.30    1.30
  -3  -5  -5    1.90    1.70
  -5   3   5    0.00    1.60
  -5   3   5    0.00    1.00
   3   5  -5    1.40    1.30
   5   3  -5    0.80    1.00
  -5   5   3    0.00    1.50
  -5   5   3    2.50    1.40
  -3  -5  -5    0.00    1.40
  -3   5   5    0.00    1.30
   3   5  -5    0.30    1.30
   5  -5   3    1.20    1.60
   3  -5   5    0.00    0.70
   3  -5   5    0.70    1.60
  -3   5   5    0.00    1.50
   5  -3   5    0.50    1.20
  -5   3  -5    0.80    1.70
   3  -5  -5    1.10    1.40
  -3   5  -5    0.00    0.80
  -3   5  -5    1.20    1.70
  -5   5  -3    0.00    1.20
  -3  -5   5    0.00    1.10
   3  -5  -5    0.00    1.50
   3   5   5    1.20    1.60
   5  -5  -3    0.00    1.50
   5  -5  -3    1.40    1.30
  -5  -3   5    0.00    1.40
  -3  -5   5    0.00    1.30
   5  -3  -5    0.90    1.60
   5  -3  -5    0.00    1.00
   3   5   5    0.00    1.60
  -5  -5   3    0.30    1.40
  -5  -5   3    0.00    1.30
  -5   5  -3    1.50    1.70
   5   3   5    0.50    1.60
   5   3   5    0.00    1.60
  -5  -3   5    2.70    1.00
  -5   3  -5    0.00    1.30
   5   5   3    0.00    1.70
   5   5   3    1.00    1.60
  -5  -5  -4 1037.00   23.90
  -5  -5  -4  986.40   23.60
   5   4  -5 1013.90   23.60
   5   4  -5 1025.00   22.90
  -5  -4  -5 1038.00   24.00
  -5  -4  -5 1002.20   23.60
   5   5  -4 1031.60   23.60
   5   5  -4  999.20   23.10
  -4  -5  -5 1025.80   24.00
   5  -4   5  996.30   23.20
  -5   4   5 1041.90   23.90
  -5   4   5 1067.49   23.00
   5  -5   4 1044.60   23.30
   5  -5   4  975.00   23.60
  -5   5   4 1019.60   23.90
  -5   5   4 1044.50   23.20
  -4   5   5 1048.40   23.20
  -4  -5  -5 1043.60   23.70
   4  -5   5  971.90   23.60
   4   5  -5 1008.50   23.40
   4   5  -5  992.10   23.10
  -4   5   5 1039.60   23.90
   4  -5   5 1006.40   23.00
   5  -4   5  984.90   23.60
   4  -5  -5 1038.10   23.90
  -5   4  -5 1026.60   23.30
  -4  -5   5  981.80   23.40
  -4  -5   5 1030.20   23.10
  -4   5  -5 1030.10   23.10
   4   5   5 1035.80   24.00
   4  -5  -5 1039.90   23.20
   5  -5  -4 1055.09   23.90
   5  -5  -4 1043.70   23.10
  -5   5  -4 1036.70   23.30
  -5   5  -4  988.70   23.60
   5  -4  -5 1053.89   24.00
   5  -4  -5 1046.40   23.00
  -5   4  -5 1024.90   23.70
   4   5   5 1058.99   23.70
  -5  -5   4 1059.39   23.60
  -5  -5   4 1045.90   23.10
   5   4   5 1041.90   24.00
   5   4   5 1019.90   23.70
  -5  -4   5 1054.29   23.70
  -5  -4   5 1043.30   22.90
   5   5   4 1031.10   24.00
   5   5   4 1061.59   23.70
  -5  -5  -5    1.70    1.70
  -5  -5  -5    0.00    1.80
   5   5  -5    1.40    1.40
   5  -5   5    0.70    1.90
   5   5  -5    0.00    1.60
  -5   5   5    0.60    1.40
  -5   5   5    0.00    1.60
   5  -5   5    3.00    1.20
  -5   5  -5    0.10    1.90
   5  -5  -5    0.00    1.40
   5  -5  -5    0.00    1.70
  -5  -5   5    1.70    1.40
  -5   5  -5    0.00    1.30
  -5  -5   5    0.30    1.50
   5   5   5    0.00    1.80
   5   5   5    0.30    1.80
  -6   0   0 3962.60   86.99
   0  -6   0 3823.62   85.99
   0   0  -6 3872.41   87.39
   0   0   6 3898.31   87.59
   0   0   6 3940.41   85.79
   0   6   0 3878.01   86.69
   0   6   0 3961.30   86.69
   0   6   0 3959.10   85.99
   6   0   0 4030.40   85.79
   6  -1   0    0.00    1.30
   6  -1   0    0.00    1.20
   6   1   0    0.50    1.30
  -6  -1   0    0.10    1.30
  -6  -1   0    0.00    1.10
  -6   1   0    0.00    1.30
  -6   1   0    0.00    1.20
  -1   0  -6    0.00    1.10
  -1   0   6    0.00    1.00
  -1   0   6    0.00    1.00
   0  -6  -1    0.90    1.20
   0  -6  -1    0.40    1.30
   0  -6   1    0.00    1.30
   0   6  -1    0.00    1.00
   0   6  -1    0.00    1.00
   0   6  -1    2.10    1.30
   0   6   1    0.10    1.10
   0   6   1    0.00    1.30
   1   0  -6    0.80    1.10
   1   0   6    0.00    1.00
   1   0   6    0.30    1.20
   6   1   0    1.70    1.10
   0   6  -2  339.77    8.50
   0   6  -2  369.36    9.00
   0  -6   2  381.86    9.10
   0   6   2  350.86    9.00
   2   0  -6  360.76    9.00
   2   0   6  357.16    8.90
   2   0   6  352.86    9.00
   6  -2   0  372.96    9.10
   6  -2   0  361.36    8.70
   6   2   0  374.96    9.30
   6   2   0  373.86    8.80
  -2   0   6  353.86    8.50
  -2   0   6  360.26    8.50
   0  -6  -2  354.76    9.00
   0   6   2  356.66    9.00
   0  -6  -2  379.36    9.10
  -2   0   6  352.66    8.90
  -6   2   0  368.06    8.80
  -6  -2   0  377.76    9.30
  -6  -2   0  370.36    8.80
  -6   2   0  366.36    9.20
   3   0  -6    0.00    1.30
   0   6   3    0.80    1.40
   0  -6   3    0.00    0.70
   0  -6   3    1.00    1.40
  -6  -3   0    0.50    1.40
  -6   3   0    0.00    1.40
   0   6  -3    0.00    0.80
   0   6  -3    0.90    1.40
   0   6   3    0.00    1.30
  -6  -3   0    0.00    1.20
   3   0   6    0.00    1.10
   3   0   6    0.00    1.50
   6  -3   0    0.00    1.40
   6  -3   0    1.60    1.30
   6   3   0    0.10    1.50
   6   3   0    1.00    1.20
   0  -6  -3    0.00    1.30
   0  -6  -3    2.00    1.40
  -3   0   6    0.50    1.20
  -3   0   6    0.00    1.00
  -3   0   6    0.90    0.90
  -3   0  -6    0.00    1.10
  -6   3   0    0.00    1.30
   6   4   0   24.10    2.10
   6  -4   0   26.50    2.40
   4   0  -6   26.00    2.00
   4   0   6   24.30    1.80
   4   0   6   23.00    2.10
  -6  -4   0   26.90    2.10
  -4   0   6   24.50    1.50
   0  -6  -4   24.90    2.10
   0  -6  -4   24.60    2.00
   6   4   0   24.20    1.80
   6  -4   0   26.30    2.00
  -4   0   6   24.30    1.90
   0   6  -4   23.50    2.00
   0   6   4   22.70    1.90
  -6   4   0   27.50    2.50
  -4   0  -6   27.40    1.90
  -6   4   0   24.80    2.00
  -4   0   6   27.00    1.60
   0  -6   4   25.40    2.00
   0   6   4   21.70    1.90
  -6  -4   0   23.80    1.80
   0  -6   4   24.60    1.40
  -6   5   0    0.00    1.50
  -5   0   6    0.50    1.50
   0   6   5    0.00    1.50
   0   6   5    0.00    1.50
   0  -6  -5    0.00    1.50
   0   6  -5    0.80    1.60
   6  -5   0    0.80    1.50
   5   0   6    0.50    1.70
   6  -5   0    0.00    1.40
   0  -6   5    0.00    1.50
   0  -6  -5    0.00    1.50
   6   5   0    2.20    1.70
   6   5   0    0.50    1.40
  -5   0  -6    0.40    1.40
  -6  -5   0    0.00    1.50
  -6  -5   0    0.60    1.50
   5   0  -6    2.00    1.60
   5   0   6    0.60    1.40
   5   0   6    0.40    1.90
  -6   5   0    0.00    1.50
  -1   6   0    0.20    1.30
   0   1  -6    0.30    1.00
   0   1  -6    2.50    1.30
   0   1   6    0.00    1.10
   0   1   6    0.90    1.10
   6   0  -1    0.30    1.40
  -6   0  -1    0.00    1.20
  -6   0   1    0.00    1.30
   0  -1  -6    0.20    1.20
   1   6   0    0.00    1.30
   1  -6   0    2.00    1.30
   6   0   1    2.00    1.30
  -1  -6   0    1.20    1.00
   6   0  -1    0.00    1.00
  -1   6   0    0.40    1.00
   0  -1   6    0.10    1.00
   0  -1   6    0.00    1.20
   1   6   0    0.00    1.10
  -1  -6   0    0.00    1.30
   0  -1  -6    0.90    1.20
   1  -6   0    0.90    1.10
   6   0  -1    0.30    1.10
   6   0   1    0.00    1.20
   6   0   1    0.50    1.30
   1   6  -1 1269.57   28.30
  -6  -1  -1 1276.67   28.20
  -1  -1  -6 1248.28   28.20
  -6  -1  -1 1319.57   28.70
   1  -6   1 1207.68   28.30
   1  -1   6 1273.27   28.30
   1  -1   6 1225.38   28.20
   1   6  -1 1214.18   28.30
  -6   1   1 1251.57   27.90
  -6   1   1 1291.67   28.70
  -1  -6  -1 1216.88   28.40
  -1  -1  -6 1248.88   28.50
   1   1  -6 1278.17   28.30
   6  -1   1 1266.07   28.60
   6   1  -1 1280.07   28.70
   1   1  -6 1224.48   28.00
  -1  -6  -1 1289.27   28.30
   1  -6   1 1259.07   28.20
   6   1  -1 1273.17   27.90
  -1   6   1 1205.48   28.30
  -1   1   6 1230.68   28.50
  -1   6   1 1242.28   28.40
  -1   1   6 1235.28   28.00
   6  -1  -1 1271.77   27.90
  -1   6  -1 1202.98   28.30
   6  -1  -1 1307.97   28.70
   1   6   1 1257.07   28.30
   1  -6  -1 1271.47   28.40
   1   6   1 1259.27   28.50
   1   1   6 1259.77   28.20
  -1  -6   1 1206.28   28.20
  -1  -6   1 1315.27   28.40
   1  -6  -1 1296.67   28.30
  -6  -1   1 1303.07   28.70
  -6  -1   1 1282.57   27.90
  -1   6  -1 1275.37   28.20
   6   1   1 1268.97   28.10
  -1  -1   6 1286.67   28.30
  -1  -1   6 1228.78   28.00
  -1   1  -6 1276.77   28.30
  -1   1  -6 1214.08   28.20
   1   1   6 1297.27   28.50
  -6   1  -1 1315.07   28.70
  -6   1  -1 1241.28   28.20
   1  -1  -6 1240.08   28.00
   1  -1  -6 1275.47   28.50
   2   1  -6   45.50    2.40
   2   1  -6   50.39    2.70
  -6  -2  -1   55.69    3.00
  -6  -2  -1   45.10    2.70
  -1  -6  -2   48.20    2.70
  -2   1   6   52.29    2.70
  -1   6   2   48.00    2.90
  -1   6   2   54.69    2.90
   6  -2   1   52.99    2.80
   6  -2   1   53.39    2.60
   6   2  -1   56.29    3.10
   6   2  -1   50.09    2.30
   1  -6   2   52.59    2.70
   1   6  -2   48.40    2.30
   1   6  -2   44.80    2.90
  -2   1   6   52.49    2.20
   1  -6   2   50.79    2.00
   2  -1   6   51.39    2.50
   2  -1   6   54.19    3.10
  -2  -1  -6   53.09    2.90
  -6   2   1   55.29    3.20
  -6   2   1   53.09    2.50
   2   1   6   45.80    2.60
   1   6   2   45.10    3.00
   2  -1  -6   52.49    2.90
  -2   1  -6   48.70    3.00
   2   1   6   54.69    2.90
   1   6   2   48.90    2.80
  -6  -2   1   53.19    3.00
  -1  -6   2   49.20    2.30
  -1  -6   2   55.09    2.80
  -1   6  -2   49.20    2.00
  -1   6  -2   52.59    2.80
   6  -2  -1   47.00    2.30
   6  -2  -1   48.20    2.90
   1  -6  -2   53.19    2.80
   1  -6  -2   49.00    2.80
   1   6   2   47.10    2.70
   6   2   1   52.79    3.20
   6   2   1   49.99    2.60
  -2  -1   6   49.50    2.30
   2   1   6   47.40    2.70
  -6  -2   1   49.70    2.40
  -2  -1   6   53.49    2.60
   2  -1  -6   53.59    2.30
  -6   2  -1   52.19    2.80
  -6   2  -1   51.69    2.80
   6  -3   1  337.77    8.40
   6   3  -1  330.17    8.60
   6   3  -1  315.77    7.90
   3   1  -6  316.27    7.60
  -1  -6  -3  326.17    8.40
   1   6  -3  314.37    7.70
  -3   1   6  319.27    8.30
  -3   1   6  322.67    7.60
   3  -1   6  321.57    8.00
   3   1  -6  320.87    8.20
   1   6  -3  303.27    8.10
  -6  -3  -1  342.07    8.60
  -6  -3  -1  322.87    8.10
  -6   3   1  328.97    8.40
  -6   3   1  327.57    7.90
  -3  -1  -6  325.27    8.30
  -1   6   3  334.47    8.50
  -1   6   3  326.47    8.20
   6  -3   1  323.87    8.10
  -3  -1  -6  332.27    8.40
   1  -6   3  332.57    8.40
  -3   1  -6  326.37    8.50
  -3   1  -6  324.97    8.10
   3   1   6  332.47    8.30
   1  -6  -3  333.87    8.40
   1  -6  -3  323.97    8.20
  -6  -3   1  318.87    7.90
   3  -1  -6  322.37    7.60
  -3  -1   6  322.07    8.20
  -3  -1   6  320.37    7.60
  -1  -6   3  306.07    7.70
   1   6   3  316.97    8.40
   1   6   3  310.47    8.20
   3  -1  -6  337.37    8.40
   6  -3  -1  328.87    8.00
   6  -3  -1  327.77    8.40
   3   1   6  331.97    8.40
   6   3   1  325.17    8.10
  -1  -6   3  320.87    8.20
  -1   6  -3  308.27    7.50
  -1   6  -3  314.77    8.30
  -6   3  -1  336.17    8.30
  -6   3  -1  331.97    8.30
  -6  -3   1  328.87    8.50
   1   6   3  335.47    8.60
   6   3   1  330.57    8.60
  -4   1   6  423.36    9.70
  -4  -1  -6  441.76   10.70
  -6  -4  -1  426.96   10.40
  -6  -4  -1  432.26   10.80
  -6   4   1  432.46   10.70
  -6   4   1  416.96   10.20
  -4  -1  -6  431.86   10.60
   4   1  -6  415.06    9.70
   6  -4   1  430.66   10.50
  -1   6   4  413.86   10.70
  -1   6   4  422.06   10.50
   1   6  -4  409.86    9.90
  -4   1   6  435.76   10.80
   4   1  -6  432.76   10.60
   6   4  -1  424.66   10.70
   1  -6   4  427.76   10.60
   6   4  -1  425.96   10.20
   6  -4   1  432.86   10.50
   4  -1   6  434.16   10.40
   4  -1   6  449.26   10.80
  -1  -6  -4  419.06   10.50
   1   6  -4  422.26   10.50
   1   6   4  427.06   10.60
   4  -1  -6  416.26   10.60
  -4  -1   6  420.26    9.70
   4  -1  -6  421.36    9.70
   1  -6  -4  432.56   10.70
  -1  -6   4  400.96    9.80
  -1  -6   4  421.36   10.40
  -1   6  -4  432.86   10.60
   6   4   1  428.56   10.40
  -6  -4   1  433.96   10.80
  -6  -4   1  426.96   10.20
  -6   4  -1  430.16   10.50
  -6   4  -1  419.86   10.50
   1   6   4  453.05   10.80
   4   1   6  437.46   10.70
   6  -4  -1  441.26   10.70
   6  -4  -1  428.56   10.30
  -4  -1   6  420.86   10.50
  -4   1  -6  436.66   10.40
   1  -6  -4  426.76   10.50
   6   4   1  440.86   10.90
   4   1   6  413.46   10.50
   1   6   4  422.06   10.80
  -4   1  -6  423.46   10.80
  -6  -5  -1  100.29    4.10
  -6  -5  -1   91.69    3.90
  -6   5   1  107.69    4.20
   6  -5   1   96.99    3.80
  -1   6   5   94.79    3.90
   6   5  -1   95.09    3.70
  -1  -6  -5   99.29    4.10
   5   1  -6   97.89    3.90
   6  -5   1   98.19    4.00
  -1   6   5   99.19    4.20
   5  -1   6   99.49    4.50
   1   6  -5   91.19    2.90
  -6   5   1   98.49    3.80
  -5  -1  -6  104.69    4.00
  -5  -1  -6  102.59    4.20
   1   6  -5  101.79    3.90
   1  -6   5   91.79    4.00
   5  -1   6   94.79    3.70
  -5   1   6  101.59    4.40
   6   5  -1  102.39    4.40
  -1  -6   5   94.59    3.80
   5  -1  -6   95.49    4.10
   6   5   1   97.09    3.90
   1  -6  -5  105.29    4.20
  -1  -6   5   92.69    2.90
  -1   6  -5   90.59    4.00
   1   6   5   92.19    4.10
  -5  -1   6  103.79    4.10
  -5   1  -6  105.49    4.00
   6   5   1  109.59    4.50
  -6  -5   1  101.89    3.80
  -6   5  -1   99.89    3.90
  -6   5  -1  101.09    4.10
  -6  -5   1   95.09    4.00
   6  -5  -1   95.29    3.90
   5   1   6  103.09    4.00
   5   1   6   98.39    4.20
   1  -6  -5   99.29    3.90
   6  -5  -1  102.59    3.80
   1   6   5  106.19    4.50
  -6   0   2  374.76    9.30
  -6   0  -2  375.16    9.30
   0  -2  -6  365.86    9.00
   0  -2   6  366.76    8.70
   0   2   6  377.46    9.20
   2   6   0  369.26    9.10
  -2  -6   0  359.86    9.00
  -2  -6   0  359.36    9.10
   2  -6   0  361.06    9.10
  -2   6   0  365.36    8.90
  -2   6   0  355.16    9.10
   6   0  -2  366.86    9.30
   6   0  -2  366.16    8.50
   2   6   0  366.96    9.10
   6   0   2  371.36    9.10
   0   2   6  373.86    9.00
   2  -6   0  354.56    8.80
   0   2  -6  376.86    9.00
   0  -2  -6  373.26    9.20
   0   2  -6  365.56    8.70
   6   0   2  374.16    9.30
   2   6  -1   46.50    2.50
   6  -1   2   54.39    2.80
   6  -1   2   52.89    3.00
  -2   6   1   50.39    2.60
  -6   1   2   50.89    2.10
   6   1  -2   50.89    2.10
   1   2  -6   52.99    2.70
   2  -6   1   51.49    2.70
  -6  -1  -2   53.69    2.80
  -1   2   6   52.09    2.50
  -1  -2  -6   52.09    2.80
   2   6  -1   51.09    2.90
   1  -2   6   52.69    2.20
   6   1  -2   52.99    3.20
  -6  -1  -2   52.39    3.10
  -2  -6  -1   54.19    3.00
  -1   2   6   53.49    2.90
  -2   6   1   50.09    2.70
  -1  -2  -6   49.90    2.70
   1  -2   6   52.59    2.80
  -6   1   2   52.29    3.20
  -2  -6  -1   46.60    2.60
   2  -6   1   51.89    2.30
   1   2  -6   52.69    2.30
  -2  -6   1   46.80    2.60
   2   6   1   50.29    3.00
   1   2   6   51.29    3.00
   6   1   2   47.90    3.00
   2   6   1   46.30    2.90
  -2  -6   1   53.69    3.00
  -6   1  -2   50.99    2.80
   2  -6  -1   51.59    2.90
  -1  -2   6   51.89    2.40
  -1  -2   6   49.00    2.40
  -1   2  -6   52.49    2.20
  -1   2  -6   45.20    2.90
   1   2   6   52.49    2.80
  -6  -1   2   56.69    3.20
   6  -1  -2   46.90    3.00
   6  -1  -2   49.50    2.10
  -6   1  -2   54.39    3.00
   6   1   2   50.09    2.80
  -6  -1   2   50.89    2.00
  -2   6  -1   51.19    2.30
  -2   6  -1   53.39    3.00
   1  -2  -6   49.80    2.50
   2  -6  -1   48.30    2.60
   1  -2  -6   58.09    3.00
   2   6  -2   53.59    2.90
   2   2  -6   55.09    2.60
   2  -2   6   52.09    2.40
  -6   2   2   51.79    3.10
  -6   2   2   56.39    2.30
   6  -2   2   53.29    2.90
   6  -2   2   53.69    3.00
  -6  -2  -2   62.59    3.40
  -6  -2  -2   51.49    2.90
   2   2  -6   53.39    2.50
  -2  -2  -6   49.80    2.80
   6   2  -2   54.69    3.30
   6   2  -2   54.69    2.20
  -2  -6  -2   53.89    3.00
  -2  -6  -2   53.59    2.90
  -2   2   6   57.89    3.20
  -2   2   6   58.79    2.40
   2  -2   6   51.49    3.10
   2  -6   2   57.89    2.90
  -2   6   2   49.50    2.70
  -2   6   2   52.69    3.00
   2   6  -2   49.90    2.50
   2  -6   2   50.49    2.20
   2  -6  -2   57.09    3.00
  -6  -2   2   51.69    2.20
   6  -2  -2   54.99    2.20
   2  -2  -6   51.89    2.40
   2  -6  -2   57.49    2.90
  -2   6  -2   56.69    2.20
  -2  -2   6   50.19    2.40
  -6  -2   2   58.29    3.30
   2   2   6   54.29    3.20
  -6   2  -2   56.29    2.80
  -6   2  -2   52.79    3.00
   6   2   2   57.39    3.10
   2  -2  -6   55.59    2.90
  -2  -6   2   51.39    2.50
  -2  -6   2   56.59    3.10
   2   6   2   52.89    3.00
  -2   6  -2   55.29    3.20
   6  -2  -2   53.69    3.10
   6   2   2   55.79    2.90
  -2   2  -6   53.09    3.20
   2   6   2   54.99    3.00
   2   2   6   55.09    3.10
  -2  -2   6   54.29    2.50
   2   2   6   53.89    3.10
  -6  -3  -2   24.90    2.00
   6   3  -2   25.10    2.10
   6   3  -2   26.30    2.10
  -3   2   6   26.80    2.00
   6  -3   2   25.10    2.00
  -2  -6  -3   26.20    2.00
  -2  -6  -3   26.30    2.00
  -2   6   3   24.80    1.90
  -2   6   3   23.20    1.90
   3   2  -6   27.10    2.40
   3   2  -6   24.60    2.00
   2  -6   3   27.30    1.60
   2  -6   3   25.60    2.00
   2   6  -3   24.90    2.10
   2   6  -3   23.10    1.80
  -6  -3  -2   26.00    2.00
   6  -3   2   28.60    2.60
  -6   3   2   24.00    2.00
  -6   3   2   28.80    2.10
   3  -2   6   24.50    2.10
   3  -2   6   24.90    2.10
  -3  -2  -6   23.40    2.10
  -3  -2  -6   26.70    1.90
  -3   2   6   28.20    1.90
   3   2   6   22.50    2.00
   3   2   6   25.70    2.00
   2   6   3   24.10    1.90
   6   3   2   26.30    2.10
   2  -6  -3   26.50    2.00
   2  -6  -3   25.20    2.00
  -3  -2   6   25.90    1.70
  -3  -2   6   23.00    1.80
  -6  -3   2   24.70    2.00
  -6  -3   2   28.30    2.10
  -2  -6   3   22.60    2.10
   6  -3  -2   27.90    2.00
   3  -2  -6   28.40    2.10
   2   6   3   23.40    2.00
  -3   2  -6   26.20    2.20
  -3   2  -6   21.30    2.00
   3  -2  -6   25.30    1.90
   6  -3  -2   23.10    2.10
  -2   6  -3   23.70    1.60
  -2   6  -3   23.50    2.00
  -2  -6   3   27.10    2.00
   6   3   2   24.40    1.90
  -6   3  -2   23.80    1.80
  -6   3  -2   24.30    2.00
   4  -2   6  209.28    6.20
   4   2  -6  211.18    6.00
   2  -6   4  209.18    6.30
  -4   2   6  217.98    6.30
  -4   2   6  215.48    5.30
  -2   6   4  224.38    6.40
  -2   6   4  211.98    6.00
  -6   4   2  214.48    6.30
  -6  -4  -2  212.18    6.30
   6   4  -2  220.38    6.40
  -6  -4  -2  212.08    6.10
   6  -4   2  227.08    6.10
   6  -4   2  219.78    6.20
   2   6  -4  206.28    5.50
   6   4  -2  219.58    5.70
   4   2  -6  210.28    5.30
   2   6  -4  209.28    6.00
  -2  -6  -4  222.28    6.30
  -4  -2  -6  219.08    6.20
  -4  -2  -6  220.48    6.40
   4  -2   6  216.78    5.80
  -6   4   2  221.38    5.80
  -2  -6  -4  209.68    6.30
  -2  -6   4  204.28    5.50
  -4  -2   6  213.98    5.30
  -2  -6   4  211.28    6.00
   2  -6  -4  213.58    6.00
   2   6   4  217.68    6.30
   4  -2  -6  216.08    6.30
  -4  -2   6  211.68    6.00
  -4   2  -6  195.88    6.20
   4   2   6  219.68    6.40
  -2   6  -4  223.88    6.30
   6   4   2  216.88    6.20
   6   4   2  223.18    6.50
   4  -2  -6  214.48    5.30
   2  -6  -4  214.48    6.30
   4   2   6  214.58    6.20
   6  -4  -2  220.38    6.30
   6  -4  -2  219.88    5.70
  -6  -4   2  214.98    6.30
  -6  -4   2  219.78    5.70
  -6   4  -2  222.38    6.10
  -6   4  -2  206.38    6.10
   2   6   4  216.48    6.40
  -4   2  -6  216.48    5.80
   5  -2   6    0.00    1.90
   5  -2   6    0.00    1.30
  -6  -5  -2    1.80    1.60
  -6  -5  -2    0.00    1.60
   2  -6   5    0.00    1.70
   2   6  -5    0.60    1.10
   2   6  -5    0.10    1.50
  -2  -6  -5    0.00    1.60
   6  -5   2    0.00    1.70
  -5   2   6    0.00    1.60
  -2   6   5    0.40    1.60
  -2   6   5    0.00    1.40
   5   2  -6    0.40    1.60
  -5  -2  -6    2.20    1.80
   6   5  -2    0.00    1.70
  -5  -2  -6    1.30    1.50
   5   2  -6    1.60    0.90
  -6   5   2    0.00    1.60
  -6   5   2    0.80    1.50
   6   5  -2    0.00    1.30
   6  -5   2    1.20    1.50
  -5   2   6    1.60    0.90
   5   2   6    2.90    1.70
  -6  -5   2    0.00    1.40
   5  -2  -6    2.30    1.70
   5  -2  -6    0.00    0.90
  -5  -2   6    1.50    1.50
   5   2   6    0.00    1.70
   6  -5  -2    0.60    1.40
  -2   6  -5    0.80    1.70
   6   5   2    0.80    1.60
  -5  -2   6    0.00    0.80
  -5   2  -6    0.70    1.30
   2   6   5    0.00    1.70
   2   6   5    1.10    1.60
  -5   2  -6    0.20    1.80
  -6   5  -2    0.60    1.50
  -6   5  -2    0.10    1.70
  -2  -6   5    1.60    1.50
  -6  -5   2    0.40    1.50
   6   5   2    0.30    1.70
   2  -6  -5    0.30    1.60
   2  -6  -5    0.40    1.50
  -2  -6   5    1.10    1.00
   2   6   5    0.00    1.60
   6  -5  -2    1.20    1.60
  -3   6   0    0.90    1.20
   0   3   6    0.00    1.20
  -3  -6   0    0.60    1.40
  -6   0  -3    1.40    1.30
  -3  -6   0    0.80    1.20
   0  -3   6    1.40    1.30
   0   3  -6    0.00    0.90
  -6   0   3    1.50    1.40
   6   0  -3    0.50    0.80
   6   0  -3    0.00    0.70
   6   0   3    0.00    1.40
   6   0   3    0.00    1.60
   6   0   3    0.00    1.40
   3   6   0    0.00    1.30
   0   3  -6    0.00    1.30
   0   3   6    0.40    1.30
   3  -6   0    0.00    1.40
  -3   6   0    0.30    1.40
   0  -3  -6    0.00    1.40
   0  -3  -6    0.00    1.30
   0  -3   6    0.10    0.80
   3   6   0    1.40    1.30
   6   0  -3    0.00    1.40
   3  -6   0    0.00    1.10
   1   3  -6  318.37    7.80
  -1  -3  -6  338.37    8.50
  -3   6   1  322.97    8.30
   6   1  -3  323.37    7.50
   3  -6   1  341.47    8.40
  -6  -1  -3  332.07    8.40
  -6   1   3  339.97    8.60
  -1   3   6  334.57    8.50
  -1   3   6  326.27    8.00
   3   6  -1  325.07    8.30
  -3   6   1  323.47    8.20
   6   1  -3  332.47    8.50
  -6   1   3  319.77    7.50
  -3  -6  -1  327.17    8.40
  -1  -3  -6  322.37    8.30
   3   6  -1  321.77    8.30
   1  -3   6  314.47    7.60
  -3  -6  -1  330.07    8.40
   6  -1   3  321.97    8.30
  -6  -1  -3  341.67    8.60
   3  -6   1  328.57    8.00
  -3  -6   1  325.17    8.20
   6  -1  -3  324.77    7.50
   6   1   3  320.07    8.30
   1   3   6  321.97    8.40
  -1  -3   6  327.27    8.00
  -1  -3   6  323.67    7.80
   1  -3  -6  319.07    8.00
   3   6   1  309.27    8.30
  -1   3  -6  323.57    7.70
  -6  -1   3  336.57    8.60
   6   1   3  330.07    8.50
  -6  -1   3  321.77    7.50
  -6   1  -3  328.17    8.50
   3   6   1  320.47    8.30
   1  -3  -6  322.67    8.40
   3  -6  -1  332.97    8.20
  -6   1  -3  323.17    8.30
  -3   6  -1  325.07    8.40
  -1   3  -6  321.97    8.30
  -3  -6   1  327.97    8.30
  -3   6  -1  319.27    7.90
   3  -6  -1  334.57    8.30
   1   3   6  328.97    8.30
   6  -1  -3  336.27    8.50
  -6  -2  -3   26.50    2.10
   2   3  -6   26.00    2.30
  -3   6   2   24.20    1.90
  -2   3   6   24.10    1.60
  -3  -6  -2   25.80    2.00
   3   6  -2   23.20    1.70
  -6  -2  -3   26.20    2.00
  -6   2   3   25.30    2.10
   3  -6   2   24.50    2.00
  -6   2   3   27.30    1.70
   3  -6   2   26.30    1.90
  -3   6   2   24.30    1.90
  -2  -3  -6   25.10    2.00
   2  -3   6   27.30    2.10
   6  -2   3   25.90    1.90
   6  -2   3   25.00    2.10
  -3  -6  -2   26.90    1.90
  -2   3   6   25.50    2.00
   3   6  -2   24.00    1.80
   6   2  -3   24.20    1.70
   2  -3   6   28.20    1.80
   6   2  -3   26.90    2.10
   2   3  -6   24.30    1.60
  -2  -3   6   23.40    2.00
  -3  -6   2   23.90    1.90
  -3   6  -2   23.90    2.00
   2   3   6   26.00    2.00
   2   3   6   22.80    2.00
   6  -2  -3   26.10    2.10
   6  -2  -3   25.50    1.80
  -2  -3   6   28.50    2.20
  -2   3  -6   21.70    2.00
  -6  -2   3   22.90    2.00
   2   3   6   24.10    2.00
   2  -3  -6   25.70    2.20
   6   2   3   23.40    2.00
  -6  -2   3   24.30    1.70
   2  -3  -6   23.60    2.00
   3  -6  -2   25.50    1.90
   3  -6  -2   24.60    1.90
  -6   2  -3   24.40    1.80
  -6   2  -3   27.60    2.10
  -3   6  -2   23.00    2.00
   3   6   2   21.20    1.90
  -3  -6   2   23.60    2.20
   3   6   2   24.30    2.00
   6   2   3   27.70    2.10
  -3  -6  -3   24.10    2.00
   6  -3   3   33.30    2.80
  -3   3   6   32.50    2.90
   3   6  -3   30.30    2.40
   6  -3   3   26.10    2.20
   6   3  -3   34.80    3.10
  -6  -3  -3   37.00    3.30
  -3  -6  -3   29.60    2.70
  -3   3   6   30.50    2.10
   3  -6   3   28.20    1.80
   3  -6   3   26.40    2.10
  -6   3   3   26.50    2.10
  -6   3   3   31.60    2.10
   3   3  -6   31.10    2.50
  -3  -3  -6   30.50    2.10
  -3  -3  -6   27.80    2.20
   3   3  -6   29.00    2.10
   3  -3   6   25.80    2.00
  -6  -3  -3   29.10    2.60
   3   6  -3   31.30    2.60
  -3   6   3   27.60    2.10
  -3   6   3   31.70    2.70
   3  -3   6   29.60    2.30
   6   3  -3   25.70    2.00
  -3  -6   3   33.00    2.60
   3   3   6   27.90    2.20
  -3   6  -3   28.30    1.80
   3  -6  -3   28.70    2.60
  -3  -6   3   29.50    2.30
   3  -6  -3   31.50    2.70
  -6   3  -3   31.30    2.70
   3  -3  -6   26.70    2.20
  -3  -3   6   35.70    2.40
   3   6   3   23.50    2.10
   6  -3  -3   28.90    2.20
  -3   6  -3   25.10    2.20
   3   3   6   28.40    2.20
  -3   3  -6   33.00    2.10
  -3   3  -6   32.40    2.90
   6   3   3   25.50    2.10
   6  -3  -3   31.20    2.10
  -6  -3   3   31.00    1.90
   3   6   3   25.20    2.10
  -6  -3   3   28.60    2.10
   6   3   3   28.60    2.20
  -6   3  -3   31.40    2.80
  -3  -3   6   30.20    2.10
   3  -3  -6   27.60    2.10
   3   6  -4   54.39    2.70
   4   3  -6   49.60    2.40
  -4  -3  -6   49.70    3.50
   4   3  -6   49.99    3.10
  -6  -4  -3   48.40    3.20
   3   6  -4   43.30    2.90
   3  -6   4   47.00    3.10
   6  -4   3   54.39    3.40
   6   4  -3   50.19    3.20
   6   4  -3   56.79    2.60
  -6   4   3   53.79    2.70
  -4  -3  -6   57.89    3.40
   4  -3   6   43.60    3.20
  -4   3   6   51.89    2.40
  -3   6   4   50.19    3.50
  -3   6   4   49.10    3.00
  -6   4   3   52.49    3.40
   4  -3   6   48.30    2.50
   3  -6   4   48.70    2.00
  -3  -6  -4   53.79    3.50
  -3  -6  -4   49.40    3.40
  -6  -4  -3   47.70    3.50
   6  -4   3   53.49    2.80
  -4   3   6   49.30    3.40
  -4   3  -6   54.09    2.70
   3   6   4   45.70    3.50
   3   6   4   44.60    3.20
   3  -6  -4   53.49    3.30
   4  -3  -6   50.19    2.40
   3  -6  -4   52.99    3.20
  -3   6  -4   48.70    2.10
  -6  -4   3   53.89    2.60
  -6   4  -3   52.89    3.00
  -6   4  -3   53.39    3.30
  -4   3  -6   48.30    3.70
  -4  -3   6   49.80    3.00
  -4  -3   6   50.69    2.30
  -3  -6   4   47.70    2.60
  -3  -6   4   53.69    3.10
  -3   6  -4   53.29    3.50
   4   3   6   55.19    3.60
   4  -3  -6   54.29    3.30
   6   4   3   57.09    3.50
   6   4   3   54.89    3.50
   6  -4  -3   56.99    2.70
   4   3   6   49.40    3.60
  -6  -4   3   53.39    3.40
   6  -4  -3   54.89    3.40
  -6   5   3  147.09    4.50
  -6  -5  -3  145.19    5.20
   5  -3   6  145.79    4.40
   6   5  -3  146.89    5.10
  -5  -3  -6  148.39    5.30
   5   3  -6  141.79    4.00
  -5  -3  -6  146.49    5.20
  -3   6   5  153.68    5.20
  -3   6   5  144.99    4.70
   6  -5   3  149.39    5.20
  -6  -5  -3  151.48    5.50
  -5   3   6  147.39    4.10
  -3  -6  -5  146.19    5.20
  -3  -6  -5  141.49    5.10
   6   5  -3  141.19    4.50
  -5   3   6  155.18    5.30
  -6   5   3  142.99    5.10
   5   3  -6  142.09    4.90
   3  -6   5  142.79    5.00
   3   6  -5  135.99    4.40
   3   6  -5  143.49    4.60
   6  -5   3  145.39    4.60
   5  -3   6  144.09    5.30
   5  -3  -6  150.18    5.20
  -5   3  -6  141.59    5.10
   3  -6  -5  144.09    4.80
   3   6   5  142.89    5.20
   5  -3  -6  144.79    4.10
  -3   6  -5  151.88    5.20
   3  -6  -5  147.49    5.20
   5   3   6  151.88    5.20
   6   5   3  152.68    5.30
  -5  -3   6  143.59    4.90
  -5  -3   6  151.88    4.00
  -5   3  -6  147.19    4.50
   6   5   3  150.98    5.20
   6  -5  -3  143.69    5.10
   6  -5  -3  149.59    4.50
  -3  -6   5  151.88    4.70
   5   3   6  150.88    5.40
  -6  -5   3  147.19    5.10
  -6  -5   3  138.79    4.40
   3   6   5  149.88    5.60
  -3  -6   5  141.79    4.40
  -6   5  -3  153.08    4.80
  -6   5  -3  149.09    5.30
   4   6   0   23.10    1.90
   0   4  -6   25.30    1.90
   0  -4   6   26.00    2.00
   0   4   6   23.40    1.90
   6   0   4   24.40    2.00
   6   0   4   27.60    2.30
   6   0   4   23.50    2.10
   6   0  -4   27.20    2.20
   0   4   6   25.10    2.00
   4  -6   0   24.60    1.80
   4   6   0   23.20    2.00
  -6   0   4   26.20    2.10
  -4  -6   0   23.20    1.90
  -4  -6   0   25.30    2.00
  -4   6   0   22.10    1.70
  -4   6   0   22.90    1.90
   0  -4  -6   23.70    2.10
   0  -4  -6   24.70    2.00
   0  -4   6   24.30    1.60
  -6   0  -4   25.60    2.00
   0   4  -6   24.50    1.60
   4  -6   0   25.80    2.00
  -6  -1  -4  437.06   10.70
  -6   1   4  437.36   10.90
  -4  -6  -1  425.56   10.70
  -4  -6  -1  430.56   10.60
   1  -4   6  423.36   10.50
  -1  -4  -6  451.95   10.90
   4  -6   1  414.96   10.50
  -1   4   6  431.36   10.80
  -1   4   6  421.96   10.30
   6  -1   4  425.56   10.50
   6  -1   4  424.76   10.70
   1  -4   6  422.86    9.70
  -6  -1  -4  439.16   10.80
   1   4  -6  415.56   10.30
   4   6  -1  439.86   10.60
   4  -6   1  427.06   10.30
  -1  -4  -6  421.96   10.50
  -4   6   1  428.96   10.50
   6   1  -4  426.16   10.70
   1   4  -6  418.16    9.90
  -4   6   1  418.36   10.50
   4   6  -1  407.26   10.40
   1   4   6  433.26   10.70
  -4   6  -1  410.46   10.50
   6   1   4  437.06   10.70
   1  -4  -6  431.06   10.30
  -6  -1   4  431.16   10.80
   1  -4  -6  430.46   10.80
  -1  -4   6  432.56    9.90
  -1  -4   6  435.96   10.30
   4  -6  -1  422.46   10.40
   6  -1  -4  431.66   10.80
  -4   6  -1  418.76   10.30
   4  -6  -1  400.46   10.40
   6   1   4  441.56   10.70
   4   6   1  422.76   10.50
  -6   1  -4  436.56   10.60
  -6   1  -4  419.06   10.70
   4   6   1  438.36   10.80
  -4  -6   1  427.16   10.50
   1   4   6  427.36   10.50
  -4  -6   1  428.16   10.40
  -6   2   4  218.78    6.40
   6   2  -4  215.68    5.20
   6  -2   4  224.58    6.00
  -6   2   4  221.78    5.20
   2  -4   6  219.98    6.30
   2   4  -6  213.78    5.80
   2   4  -6  202.08    5.50
  -6  -2  -4  226.58    6.50
  -6  -2  -4  218.58    6.20
   4  -6   2  213.08    5.70
  -2   4   6  218.28    6.30
  -4   6   2  217.08    6.20
  -4   6   2  219.78    6.10
  -2  -4  -6  215.98    6.30
  -4  -6  -2  206.98    6.10
  -2   4   6  221.78    5.80
   4   6  -2  205.38    6.00
  -4  -6  -2  213.98    6.30
   6  -2   4  207.08    6.20
   4  -6   2  210.68    6.10
   4   6  -2  222.48    6.20
   2  -4   6  202.68    5.20
   6   2  -4  231.48    6.50
   4   6   2  209.38    6.10
   4   6   2  221.38    6.40
  -6  -2   4  209.68    5.10
  -2  -4   6  208.48    5.60
   2   4   6  211.58    6.10
  -2   4  -6  213.88    6.30
  -6  -2   4  217.68    6.30
  -4   6  -2  209.38    6.10
  -2  -4   6  215.98    5.80
  -6   2  -4  225.28    6.50
   4  -6  -2  220.68    6.00
  -4  -6   2  219.38    6.00
   2  -4  -6  229.78    6.50
   2  -4  -6  216.48    5.80
   6  -2  -4  224.68    5.20
  -4  -6   2  210.88    5.90
  -6   2  -4  217.38    6.10
   6  -2  -4  223.88    6.40
   2   4   6  214.18    6.40
   6   2   4  221.48    6.40
   6   2   4  208.98    6.20
   2   4   6  208.08    6.30
   4  -6  -2  217.88    6.20
  -4   6  -2  212.38    5.70
  -3  -4  -6   49.30    3.30
  -6   3   4   49.10    3.40
   4  -6   3   49.70    3.40
   4  -6   3   52.39    2.50
  -3   4   6   47.00    2.70
  -6  -3  -4   49.10    3.30
  -6   3   4   55.49    2.30
  -4  -6  -3   51.49    3.40
  -3  -4  -6   54.19    3.40
   3   4  -6   52.49    2.70
   6  -3   4   50.69    3.50
   6   3  -4   53.09    3.20
   6   3  -4   52.09    2.20
   3  -4   6   49.80    3.40
   6  -3   4   48.70    2.80
  -3   4   6   51.19    3.40
   3   4  -6   50.99    2.80
   4   6  -3   53.19    3.10
  -4   6   3   55.19    3.50
   4   6  -3   49.60    3.10
  -6  -3  -4   53.89    3.50
  -4  -6  -3   47.80    3.30
   3  -4   6   47.50    2.20
  -4   6   3   56.79    3.20
  -6   3  -4   49.40    3.70
   6   3   4   50.39    3.20
   6  -3  -4   56.59    2.30
  -3  -4   6   51.19    2.50
  -3   4  -6   44.30    2.20
   4  -6  -3   51.69    3.00
  -4  -6   3   47.90    3.00
  -4  -6   3   54.79    3.00
  -4   6  -3   50.89    2.50
  -4   6  -3   50.59    3.30
  -6   3  -4   52.19    3.20
   3  -4  -6   55.19    2.80
   3   4   6   49.70    3.10
   4  -6  -3   55.19    3.40
  -3  -4   6   50.69    2.80
   3  -4  -6   52.29    3.60
   4   6   3   48.50    3.20
   6   3   4   50.39    3.50
   4   6   3   51.29    3.50
   6  -3  -4   56.49    3.50
  -6  -3   4   57.89    3.60
  -6  -3   4   55.09    2.30
   3   4   6   43.90    3.50
  -3   4  -6   50.39    3.60
   6   4  -4   90.19    3.90
  -4  -4  -6  101.19    4.40
  -4  -6  -4   92.79    4.10
   4   6  -4   89.89    3.70
   4   6  -4   93.69    3.80
   6  -4   4  102.59    4.40
  -4   4   6   91.49    3.30
   4  -4   6   91.49    4.10
   4   4  -6   92.29    3.70
   4  -6   4   92.49    3.10
   4  -6   4   91.19    4.10
  -4  -6  -4  101.19    4.60
  -6   4   4   98.69    4.20
  -6   4   4  101.49    3.40
   6  -4   4   96.59    3.70
  -4  -4  -6  103.79    4.60
   4   4  -6  100.19    3.30
   6   4  -4   94.09    3.30
   4  -4   6   94.39    3.20
  -6  -4  -4  103.59    4.30
  -4   6   4   98.09    3.80
  -4   4   6  101.79    4.30
  -6  -4  -4  100.19    4.40
  -4   6   4   98.19    4.20
  -4   6  -4   95.59    4.40
   4   6   4  100.39    4.40
  -4   4  -6   95.19    4.50
   4  -6  -4   96.69    4.20
   4  -6  -4   99.39    3.70
   6   4   4   99.29    4.40
  -6  -4   4   98.19    3.30
   4   6   4  106.49    4.50
   4  -4  -6   96.79    3.40
   6  -4  -4  103.79    4.30
  -4  -6   4   99.59    3.80
   6   4   4  101.89    4.20
  -4  -4   6   94.19    3.30
  -6   4  -4   93.99    4.40
   4   4   6   98.29    4.20
  -4   6  -4  100.09    3.20
   4   4   6   99.89    4.60
  -4  -6   4   96.99    3.80
  -6   4  -4   97.79    3.80
   4  -4  -6   94.79    4.20
  -6  -4   4   94.29    4.00
   6  -4  -4  105.39    3.40
  -4   4  -6   98.39    3.30
  -4  -4   6   96.49    3.80
  -4  -6  -5    9.60    1.90
   4  -6   5    8.10    1.10
   5   4  -6    7.70    1.80
   5   4  -6    8.00    1.40
   5  -4   6    6.10    1.30
   5  -4   6    8.80    2.10
  -6  -5  -4    6.80    2.00
   4   6  -5    8.00    1.70
  -5  -4  -6    5.30    1.80
  -4  -6  -5    3.90    1.90
  -4   6   5    6.70    1.90
  -6   5   4    8.00    1.90
  -6   5   4   10.30    1.60
   6  -5   4    6.10    2.00
  -5  -4  -6    5.70    2.00
   4  -6   5    6.60    2.00
   6   5  -4   10.90    2.00
   6   5  -4    8.50    1.50
  -6  -5  -4    6.00    1.80
  -5   4   6    6.80    1.90
  -5   4   6    8.80    1.40
   6  -5   4    5.50    1.50
   4   6  -5    9.90    1.70
  -4   6   5    5.50    1.60
  -6   5  -4    6.60    2.00
   4  -6  -5    7.40    1.70
   6  -5  -4    9.50    2.00
  -5  -4   6    7.60    1.70
  -5   4  -6    8.10    1.40
  -4   6  -5    7.30    1.20
  -5   4  -6    6.40    2.10
   5  -4  -6    9.20    1.40
   4  -6  -5    6.70    1.90
  -4  -6   5    9.20    1.70
   4   6   5    5.80    1.90
   5  -4  -6    9.90    2.00
  -6  -5   4    8.70    1.50
  -5  -4   6    8.30    1.30
  -6  -5   4    6.20    1.70
   5   4   6    3.60    2.00
   6   5   4    9.00    2.10
   6   5   4    6.40    1.90
  -6   5  -4    5.90    1.60
   6  -5  -4    7.10    1.60
  -4  -6   5    6.80    1.50
  -4   6  -5    7.40    2.10
   5   4   6    9.30    2.00
   4   6   5    9.50    2.10
   5   6   0    0.10    1.60
   0  -5   6    2.10    1.50
   0   5   6    1.60    1.50
   5  -6   0    0.60    1.40
   5   6   0    0.00    1.50
  -5   6   0    0.00    1.60
   6   0  -5    0.00    1.60
   6   0   5    0.00    1.40
   6   0   5    0.00    1.90
  -5  -6   0    0.00    1.50
   0  -5  -6    0.00    1.50
  -6   0  -5    1.80    1.50
  -6   0   5    0.00    1.60
  -5  -6   0    0.80    1.50
   0  -5   6    0.80    0.70
   0   5   6    0.00    1.50
   0  -5  -6    0.00    1.50
  -5   6   0    1.00    1.40
   5  -6   0    1.70    1.60
   0   5  -6    0.00    0.70
   0   5  -6    0.00    1.60
   6   0   5    0.00    1.70
  -5   6   1  101.59    4.00
  -6   1   5  100.99    4.50
   6   1  -5  107.89    4.30
  -1   5   6   99.29    3.80
   6  -1   5   96.29    4.50
   1  -5   6   94.89    3.80
   1   5  -6   91.29    2.90
   1   5  -6   92.49    3.70
  -1  -5  -6  100.39    4.20
  -1  -5  -6   99.99    4.00
  -1   5   6  101.29    4.20
  -5  -6  -1   95.79    4.00
   5  -6   1   97.19    3.70
   5  -6   1   93.99    4.00
   5   6  -1  104.79    4.20
   5   6  -1   99.19    3.80
  -5  -6  -1   94.99    4.00
  -6  -1  -5  100.69    4.30
  -6  -1  -5  101.39    4.30
   6  -1   5  104.59    3.90
  -5   6   1   99.59    4.00
  -6   1  -5  102.79    4.00
  -5   6  -1   98.19    3.70
  -6  -1   5   94.39    4.10
  -1   5  -6   91.79    4.10
   5   6   1  102.29    4.10
   6  -1  -5  110.49    4.40
  -1  -5   6  101.09    3.90
   6   1   5   98.29    4.20
   6   1   5   97.59    4.10
   5  -6  -1  100.59    3.90
  -1  -5   6   92.99    3.00
   1  -5  -6  101.49    3.80
  -5  -6   1  103.79    4.00
   1   5   6  101.59    3.90
   5  -6  -1   99.09    4.00
   5   6   1  102.39    4.40
  -5  -6   1   99.59    4.00
  -5   6  -1  103.19    4.10
   1   5   6   97.09    4.20
   1  -5  -6  103.79    4.20
   6  -2   5    1.00    1.40
  -6   2   5    0.00    0.80
  -5   6   2    2.00    1.60
  -5   6   2    0.40    1.50
  -5  -6  -2    0.50    1.50
  -2   5   6    0.40    1.40
   6   2  -5    0.00    1.60
  -6  -2  -5    0.00    1.80
   6  -2   5    1.00    1.90
  -6  -2  -5    0.00    1.50
  -6   2   5    0.00    1.60
   5  -6   2    0.90    1.30
  -2  -5  -6    2.90    1.70
  -2   5   6    0.30    1.60
   5   6  -2    0.00    1.40
   2   5  -6    0.70    1.50
   2  -5   6    1.60    1.80
   5  -6   2    0.00    1.70
   5   6  -2    1.90    1.70
   2   5  -6    1.40    1.20
  -5  -6  -2    1.00    1.70
  -5   6  -2    0.00    1.60
  -5   6  -2    0.50    1.40
   2  -5  -6    0.00    1.40
  -6  -2   5    1.00    1.60
   6   2   5    0.00    1.70
   5   6   2    0.00    1.70
   2   5   6    1.30    1.70
   2   5   6    0.20    1.60
   2   5   6    1.00    1.60
   5  -6  -2    0.90    1.60
   5  -6  -2    0.40    1.50
   6   2   5    0.00    1.70
  -6   2  -5    0.40    1.40
  -6   2  -5    1.90    1.80
  -2  -5   6    0.70    1.40
   2  -5  -6    0.10    1.60
   5   6   2    0.90    1.60
   6  -2  -5    2.00    1.70
   6  -2  -5    0.50    0.80
  -2  -5   6    0.00    1.00
  -5  -6   2    0.30    1.40
  -5  -6   2    0.00    1.40
  -2   5  -6    1.10    1.70
   5  -6   3  142.39    4.40
  -3  -5  -6  145.19    5.10
   5   6  -3  142.79    4.90
   6  -3   5  144.69    5.30
   6   3  -5  135.99    4.90
   5   6  -3  144.89    4.70
   6   3  -5  148.09    3.90
  -6  -3  -5  156.68    5.30
   3  -5   6  134.69    3.70
  -6   3   5  150.48    5.50
  -6   3   5  143.49    4.00
  -5  -6  -3  141.69    5.30
  -5  -6  -3  147.49    5.10
  -3   5   6  148.09    5.20
   3  -5   6  140.29    4.90
   3   5  -6  137.99    4.40
   3   5  -6  145.09    4.60
  -5   6   3  148.49    5.10
  -5   6   3  146.49    4.70
  -3  -5  -6  142.49    5.20
  -3   5   6  139.29    4.50
   5  -6   3  145.09    5.10
   6  -3   5  143.59    4.60
  -6  -3  -5  148.69    5.30
  -6   3  -5  144.79    4.80
  -5  -6   3  145.59    4.90
   5   6   3  149.09    5.20
  -3  -5   6  135.59    4.40
   3  -5  -6  141.69    4.60
  -6   3  -5  147.59    5.40
  -5  -6   3  142.19    4.60
  -5   6  -3  142.09    4.40
  -5   6  -3  153.88    5.30
   3   5   6  147.69    5.30
   3   5   6  150.68    5.20
   5  -6  -3  148.59    5.20
   5  -6  -3  157.28    4.80
   6  -3  -5  141.39    5.20
   3  -5  -6  145.79    5.10
  -3   5  -6  145.99    5.20
  -6  -3   5  138.79    4.90
  -6  -3   5  148.49    4.00
  -3   5  -6  146.19    3.80
  -3  -5   6  150.48    4.50
   6  -3  -5  150.68    4.00
   5   6   3  142.29    5.40
   6   3   5  144.49    5.20
   6   3   5  161.48    5.40
   4  -5   6    8.10    1.10
  -5  -6  -4    7.10    2.00
  -5  -6  -4    7.00    1.80
  -4  -5  -6    6.60    2.00
  -6   4   5    8.20    1.90
  -6   4   5    8.20    1.40
  -6  -4  -5    6.70    1.90
  -6  -4  -5    7.60    2.10
  -4   5   6    8.30    1.90
  -4   5   6    8.30    1.50
  -5   6   4    9.20    1.70
  -4  -5  -6    8.70    1.90
   6  -4   5    7.20    1.50
   4  -5   6    7.40    2.00
   4   5  -6    5.40    1.70
   4   5  -6    8.10    1.60
  -5   6   4    5.70    1.90
   6  -4   5    5.30    2.00
   6   4  -5    6.70    2.00
   6   4  -5    6.50    1.30
   5  -6   4    8.50    1.40
   5  -6   4    4.90    2.00
   5   6  -4    9.40    1.80
   5   6  -4    7.50    1.60
   5   6   4    8.60    2.00
   5   6   4    5.60    1.90
   6  -4  -5    8.10    2.00
   6  -4  -5    8.00    1.40
  -5  -6   4    6.20    1.60
   4   5   6    6.50    2.00
   5  -6  -4    9.70    2.00
   5  -6  -4    7.90    1.70
   6   4   5    8.20    2.00
   6   4   5    8.00    2.10
  -5  -6   4    7.50    1.70
  -5   6  -4    8.20    1.40
  -5   6  -4    9.30    2.00
   4   5   6    8.40    2.00
   4  -5  -6    7.40    2.00
   4  -5  -6    8.80    1.60
  -6   4  -5   10.30    2.20
  -4  -5   6    4.00    1.50
  -4  -5   6    8.70    1.50
  -4   5  -6    7.10    1.20
  -4   5  -6    5.10    2.00
  -6  -4   5    7.00    1.80
  -6  -4   5    6.90    1.30
  -6   4  -5   11.30    1.70
  -6  -5  -5 2118.79   47.20
   5  -5   6 2017.40   47.10
   5   5  -6 2108.19   47.20
   6  -5   5 2097.59   46.90
  -6   5   5 2148.19   46.50
  -5  -6  -5 2118.09   47.10
   6   5  -5 2079.59   46.40
   5  -6   5 2118.09   47.20
  -5  -5  -6 2139.09   47.20
   5  -5   6 2061.89   46.80
   5   6  -5 2002.30   47.20
   6  -5   5 2013.50   47.10
  -5   5   6 2134.49   46.50
   5   5  -6 2125.29   46.50
  -5   6   5 2134.69   46.60
   5   6  -5 2070.69   46.60
   6   5  -5 2141.79   47.40
   5  -6   5 2114.49   46.80
   5  -6  -5 2120.89   46.60
   5  -5  -6 2130.39   47.70
   5  -5  -6 2118.49   46.50
  -5  -6   5 2108.09   46.60
  -6  -5   5 2008.80   47.30
  -6  -5   5 2131.59   46.40
  -5   6  -5 2109.19   46.80
   5   5   6 2140.69   47.70
  -5  -5   6 2117.29   46.40
   5  -6  -5 2100.49   47.60
   5   6   5 2106.59   47.70
   6  -5  -5 2165.68   47.70
   6  -5  -5 2135.79   46.50
  -6   5  -5 2076.99   47.00
  -5   5  -6 2134.39   46.80
  -5  -5   6 2110.79   47.20
  -5  -6   5 2104.19   47.20
   6   5   5 2105.89   47.70
  -6  -6   0 1847.62   43.20
  -6  -6   0 1889.51   42.60
  -6   0  -6 1984.40   43.20
  -6   0   6 1903.91   43.30
  -6   6   0 1885.41   43.00
  -6   6   0 1900.51   42.60
   0  -6  -6 1918.11   43.30
   0  -6  -6 1880.81   42.70
   0  -6   6 1866.01   42.60
   0   6  -6 1886.91   42.70
   0   6   6 1962.10   43.40
   0   6   6 1912.91   42.70
   6  -6   0 1931.91   43.00
   6  -6   0 1940.81   42.60
   6   0  -6 1950.90   43.30
   6   0   6 1942.71   43.10
   6   0   6 1958.30   43.00
   6   0   6 1938.31   42.90
   6   6   0 1899.61   43.30
   6   6   0 1861.81   42.60
  -6  -6  -1    0.10    1.60
  -6  -6  -1    0.00    1.70
   6  -6   1    3.10    1.70
   1   6  -6    2.70    1.70
  -6  -1  -6    0.60    1.60
  -6  -1  -6    0.00    1.90
   6   1  -6    0.00    1.80
   1   6  -6    0.40    1.00
  -6   1   6    0.10    1.70
   6   6  -1    0.00    1.80
   6   6  -1    0.00    1.50
  -6   6   1    0.40    1.60
  -6   6   1    0.00    1.70
  -1  -6  -6    0.00    1.60
  -1  -6  -6    0.00    1.70
   6  -6   1    0.00    1.50
   6  -1   6    0.00    1.50
   6  -1   6    0.00    2.00
  -1   6   6    1.40    1.70
  -1   6   6    1.20    1.60
   1  -6   6    0.60    1.70
  -1  -6   6    0.00    0.80
   1  -6  -6    0.00    1.70
  -6   1  -6    1.20    1.50
  -6  -6   1    1.90    1.60
   1   6   6    0.00    1.70
   1   6   6    1.50    1.70
   6  -6  -1    0.00    1.60
   6  -6  -1    0.00    1.60
   1  -6  -6    0.00    1.60
  -6  -6   1    0.00    1.50
   6  -1  -6    0.00    1.80
  -1  -6   6    0.20    1.60
  -1   6  -6    0.00    1.70
  -6  -1   6    0.00    1.60
   6   1   6    0.00    1.60
   6   1   6    0.00    1.80
  -6   6  -1    0.00    1.50
  -6   6  -1    0.80    1.70
   6   6   1    0.00    1.80
   6   6   1    0.00    1.60
  -6  -6  -2  205.98    6.30
  -6  -6  -2  190.48    6.00
   2  -6   6  203.68    6.20
   6   6  -2  198.38    6.30
  -6  -2  -6  208.18    6.50
  -6  -2  -6  202.98    6.50
  -6   6   2  202.28    5.90
   6  -2   6  197.98    5.80
   6  -2   6  194.58    6.20
  -6   2   6  207.48    6.40
  -6   2   6  204.58    4.80
   6  -6   2  205.28    6.20
   2   6  -6  195.68    5.30
  -6   6   2  208.38    6.30
  -2   6   6  197.08    5.90
  -2  -6  -6  194.58    6.10
   6   2  -6  193.08    6.10
   2   6  -6  189.18    5.80
   6   6  -2  195.08    5.80
  -2   6   6  204.28    6.50
   6  -6   2  196.68    5.80
   2  -6  -6  202.08    6.30
   2  -6  -6  197.08    5.80
  -6  -2   6  204.88    6.30
  -6   6  -2  188.58    6.00
  -2  -6   6  200.28    5.90
   2   6   6  199.58    6.50
   2   6   6  202.68    6.40
   2   6   6  201.68    6.20
  -2   6  -6  199.48    6.30
   6  -6  -2  202.48    5.80
  -6  -6   2  190.68    6.10
  -6   6  -2  191.88    5.80
   6  -2  -6  203.28    6.30
   6  -2  -6  192.88    4.80
  -6   2  -6  205.88    5.90
  -6   2  -6  196.58    6.30
  -2  -6   6  187.88    5.20
   6   2   6  206.28    6.40
   6   2   6  197.68    6.30
  -6  -6   2  198.18    5.80
   6  -6  -2  196.08    6.10
   6   6   2  204.78    6.60
   6   6   2  195.18    6.10
  -6  -6  -3    0.00    1.60
  -6  -6  -3    1.00    1.80
   6   6  -3    0.00    1.80
   6   6  -3    0.00    1.50
  -6  -3  -6    0.20    1.70
  -6  -3  -6    0.00    2.00
   6  -3   6    0.80    2.00
   6   3  -6    0.00    1.80
  -6   3   6    0.00    1.80
  -6   3   6    0.00    1.10
   3  -6   6    0.00    1.90
   3   6  -6    0.00    1.40
  -6   6   3    2.20    1.80
  -6   6   3    0.00    1.60
  -3  -6  -6    0.60    1.90
   6   3  -6    0.00    1.00
   3   6  -6    1.00    1.60
   6  -3   6    0.70    1.40
  -3   6   6    0.00    1.70
  -3   6   6    0.00    1.50
   6  -6   3    1.30    1.90
   6  -6   3    1.30    1.50
   3  -6  -6    1.80    1.80
  -6   6  -3    0.70    1.90
  -3  -6   6    0.00    1.50
   3   6   6    0.80    1.90
   3   6   6    3.50    1.90
   6  -6  -3    0.40    1.80
   6  -6  -3    0.90    1.60
   3  -6  -6    0.00    1.60
  -6   6  -3    1.10    1.50
   6  -3  -6    1.00    1.90
   6  -3  -6    0.00    1.10
  -3   6  -6    0.00    1.90
  -6  -3   6    0.00    1.70
  -6   3  -6    0.00    1.50
  -3  -6   6    0.00    1.20
   6   3   6    3.40    1.90
   6   3   6    0.00    1.90
  -6  -6   3    0.40    1.60
  -6  -6   3    0.00    1.60
   6   6   3    0.00    1.90
   6   6   3    0.00    1.80
  -6  -6  -4  560.74   13.70
   6  -4   6  524.35   13.00
   6  -4   6  549.25   13.70
  -6  -4  -6  551.24   13.70
   6   4  -6  538.75   12.60
   6  -6   4  549.85   13.60
   6   6  -4  544.65   13.50
  -6   4   6  558.94   12.70
   4   6  -6  543.85   13.20
  -6   6   4  555.84   13.80
  -6   6   4  566.14   13.20
  -4  -6  -6  552.04   13.70
   6   4  -6  529.05   13.50
   6  -6   4  547.95   13.00
   6   6  -4  524.65   13.00
  -4   6   6  552.94   13.10
   4  -6   6  556.54   13.80
   4   6  -6  553.14   13.20
   4  -6   6  534.75   12.60
   4  -6  -6  539.85   13.80
  -4  -6   6  526.95   13.10
   4  -6  -6  552.64   13.10
   4   6   6  554.44   13.90
   6  -6  -4  556.54   13.80
   6  -6  -4  562.14   13.10
  -4  -6   6  553.14   13.10
  -6  -4   6  555.34   12.70
   6  -4  -6  565.84   13.90
   6  -4  -6  537.35   12.70
  -6  -6   4  545.05   13.40
  -6  -6   4  559.24   13.10
  -6   6  -4  547.45   13.10
  -6  -4   6  537.25   13.50
   6   4   6  577.64   14.00
  -6   4  -6  562.14   13.20
  -4   6  -6  546.25   12.60
   6   6   4  549.45   13.90
  -6  -6  -5    0.40    2.10
   6  -5   6    0.00    2.20
   6   5  -6    0.00    2.00
  -6  -5  -6    0.50    2.10
   6  -6   5    0.00    2.10
   6   6  -5    0.00    2.00
   6   6  -5    1.30    1.60
  -6   5   6    0.00    1.40
   6  -6   5    2.80    1.50
  -6   6   5    0.00    1.60
  -5  -6  -6    0.10    2.10
   5   6  -6    2.00    1.80
   6  -5   6    0.60    1.40
   5  -6   6    1.90    1.20
  -5   6   6    0.00    1.60
   6   5  -6    0.90    1.40
   5   6  -6    0.00    1.60
   5  -6   6    0.00    2.10
  -5   6  -6    2.70    1.40
  -5  -6   6    0.00    1.60
   5  -6  -6    0.00    1.70
   5   6   6    0.00    2.10
   6  -6  -5    2.00    2.00
   6  -6  -5    0.00    1.70
  -6   6  -5    0.40    1.50
  -6  -5   6    1.20    1.80
   6  -5  -6    0.90    2.00
   6  -5  -6    0.70    1.50
  -5  -6   6    0.00    1.70
  -6  -6   5    0.00    1.70
  -6  -6   5    0.00    1.70
   5  -6  -6    1.10    2.00
   6   5   6    0.00    2.10
  -6  -5   6    1.70    1.50
  -6   5  -6    0.10    1.60
   6   6   5    0.00    2.10
  -6  -6  -6  339.67    9.30
   6   6  -6  302.67    8.70
   6   6  -6  329.77    8.30
   6  -6   6  320.77    8.10
   6  -6   6  316.87    9.00
  -6  -6   6  317.87    8.70
  -6   6  -6  320.27    8.20
   0  -7   1   77.79    3.50
   0   7  -1   75.09    3.10
   0   7  -1   82.49    3.00
   0   7  -1   86.09    3.70
   0   7   1   81.19    3.40
   0   7   1   84.39    3.80
   1   0  -7   83.79    3.40
   1   0   7   85.79    3.20
   1   0   7   80.69    3.50
   1   0   7   79.49    3.40
   7  -1   0   92.39    4.00
   7  -1   0   84.79    3.20
   7   1   0   81.19    3.80
   7   1   0   83.39    3.20
  -1   0   7   82.19    3.30
  -1   0   7   81.79    3.20
   0  -7  -1   80.19    3.60
  -1   0   7   85.79    3.30
  -7   1   0   77.99    3.60
  -7   1   0   82.59    3.30
  -1   0  -7   81.09    3.30
  -7  -1   0   82.69    3.20
  -7  -1   0   82.19    3.80
   2   0  -7    0.80    1.40
   0   7   2    0.80    1.50
   0   7   2    0.00    1.40
   0   7  -2    0.30    1.10
   0   7  -2    0.00    1.00
   0   7  -2    0.00    1.50
   0  -7   2    1.30    1.50
  -2   0   7    0.00    1.20
   0  -7  -2    0.00    1.30
   0  -7  -2    0.00    1.50
   7  -2   0    0.90    1.40
   7   2   0    0.00    1.60
   7   2   0    0.00    1.30
   2   0   7    0.00    1.40
   7  -2   0    0.00    1.60
   2   0   7    0.00    1.20
   2   0   7    0.00    1.20
  -2   0   7    0.10    1.30
  -7  -2   0    0.00    1.50
  -7  -2   0    0.00    1.30
  -7   2   0    1.60    1.50
  -7   2   0    1.70    1.40
  -2   0   7    2.00    1.30
   7   3   0    6.30    1.80
  -7   3   0    4.80    1.70
  -7   3   0    5.20    1.60
  -3   0  -7    5.90    1.40
   7  -3   0    2.70    1.70
   7  -3   0    6.80    1.50
   3   0   7    3.40    1.80
   3   0   7    4.90    1.70
   0   7   3    5.50    1.70
   3   0  -7    3.80    1.60
   3   0   7    5.40    1.40
   0   7  -3    5.60    1.60
   0   7   3    4.40    1.50
   0  -7  -3    6.10    1.60
   0  -7  -3    1.90    1.60
   0  -7   3    3.80    1.70
   0   7  -3    5.70    1.00
  -7  -3   0    4.90    1.50
  -3   0   7    4.70    1.30
  -3   0   7    4.90    1.20
  -7  -3   0    5.40    1.70
   7   3   0    6.20    1.50
  -3   0   7    5.00    1.50
   0  -7   4    0.00    1.60
   0   7  -4    0.00    0.90
   0  -7   4    0.00    0.80
   4   0  -7    1.80    1.60
   4   0   7    0.00    1.40
   7   4   0    0.00    1.70
   7   4   0    0.50    1.40
  -7   4   0    0.00    1.60
   0   7   4    0.10    1.60
   4   0   7    0.00    1.90
   0   7   4    0.00    1.50
  -4   0   7    0.10    1.00
   0  -7  -4    0.00    1.60
   0  -7  -4    0.00    1.60
   4   0   7    0.00    1.60
   7  -4   0    1.20    1.70
   7  -4   0    0.00    1.50
   0   7  -4    0.00    1.60
  -7   4   0    0.00    1.60
  -7  -4   0    0.50    1.50
  -4   0  -7    0.40    1.40
  -4   0   7    0.00    1.50
  -4   0   7    0.00    1.00
  -7  -4   0    0.00    1.60
   0   7   5 1280.97   29.30
   0  -7  -5 1289.57   29.30
   5   0   7 1306.07   29.50
   7   5   0 1299.77   29.10
  -7  -5   0 1294.17   29.70
   5   0   7 1278.17   29.40
  -7   5   0 1293.27   29.10
   7   5   0 1276.37   29.70
  -5   0  -7 1319.77   29.50
  -5   0   7 1291.57   29.60
   0  -7  -5 1293.97   29.70
   5   0  -7 1270.37   29.60
   0  -7   5 1268.07   29.20
   0   7  -5 1207.78   29.20
   0   7   5 1290.47   29.70
   7  -5   0 1324.07   29.60
   7  -5   0 1295.27   29.10
  -7   5   0 1321.77   29.60
  -7  -5   0 1304.57   29.10
   5   0   7 1331.97   29.60
  -5   0   7 1260.27   28.30
  -7   6   0    0.40    1.80
  -7   6   0    3.20    1.80
   0   7  -6    0.00    1.90
   0  -7   6    0.00    1.80
   7   6   0    2.30    1.80
  -7  -6   0    0.50    1.80
  -7  -6   0    0.80    1.70
   0  -7  -6    0.00    1.90
   0  -7  -6    0.20    1.80
  -6   0  -7    0.30    1.70
   0   7   6    2.80    1.80
   6   0  -7    0.00    1.90
   6   0   7    0.00    1.70
   7  -6   0    0.00    1.80
   7  -6   0    2.00    1.80
   7   6   0    1.30    2.10
   6   0   7    0.00    2.20
  -6   0   7    1.60    1.80
   0  -1   7   85.89    3.20
   1  -7   0   77.19    3.50
   0   1  -7   85.29    3.20
   0   1  -7   77.29    3.30
  -1   7   0   85.49    3.80
   0  -1  -7   81.99    3.40
  -1   7   0   84.19    3.20
   0   1   7   82.39    3.30
   0   1   7   84.79    3.30
   1  -7   0   81.99    3.20
   0  -1   7   84.89    3.40
   7   0  -1   83.79    3.20
   7   0   1   87.89    3.70
   7   0   1   82.49    3.60
   7   0   1   84.49    3.50
  -1  -7   0   77.99    3.40
  -1  -7   0   82.59    3.50
   1   7   0   81.69    3.50
   1   7   0   83.99    3.80
   7   0  -1   84.59    3.80
   0  -1  -7   80.69    3.30
  -7   0  -1   82.49    3.80
  -7   0   1   83.69    4.00
   7   0  -1   83.69    3.10
   1  -7   1    1.50    1.10
   1   7  -1    0.00    1.20
   1  -1   7    0.00    1.10
   1   1  -7    0.00    1.20
   1   7  -1    0.30    1.40
  -1  -1  -7    0.00    1.30
  -1  -1  -7    0.70    1.50
   1  -1   7    0.00    1.50
  -7   1   1    0.30    1.50
  -7  -1  -1    0.90    1.50
  -7  -1  -1    0.00    1.40
  -1   7   1    2.40    1.60
   7   1  -1    0.20    1.20
  -1  -7  -1    0.50    1.50
   1  -7   1    0.00    1.50
   7  -1   1    0.80    1.50
   7  -1   1    0.00    1.40
   7   1  -1    0.70    1.60
  -1   1   7    1.00    1.30
  -1   1   7    0.00    1.20
  -1   7   1    0.00    1.30
   1   1  -7    0.00    1.30
  -7   1   1    0.00    1.20
  -1   7  -1    0.00    1.10
   1   7   1    0.00    1.30
  -1   7  -1    0.90    1.50
   1   1   7    0.00    1.20
   1   1   7    0.90    1.40
   1  -7  -1    0.80    1.50
  -7   1  -1    0.00    1.50
  -1  -7   1    0.00    1.10
  -1  -7   1    0.00    1.50
   1   7   1    0.90    1.50
   7  -1  -1    0.00    1.60
   7  -1  -1    0.00    1.20
  -1  -1   7    0.00    1.30
  -1   1  -7    0.00    1.20
  -1   1  -7    1.10    1.60
   7   1   1    0.60    1.60
  -7  -1   1    0.00    1.20
   1  -1  -7    0.30    1.30
   7   1   1    1.40    1.40
  -1  -1   7    0.00    1.10
   1  -7  -1    0.40    1.30
  -7   1  -1    0.00    1.50
  -7  -1   1    0.00    1.40
   1  -1  -7    0.00    1.30
  -7   2   1  280.47    7.50
   2   1  -7  263.17    7.00
  -1   7   2  271.97    7.30
   7  -2   1  273.27    7.10
   2  -1   7  256.97    6.80
  -7   2   1  267.97    6.80
  -2  -1  -7  270.87    7.30
   1   7  -2  251.17    7.10
   7  -2   1  265.27    7.30
   1  -7   2  261.07    6.50
  -2   1   7  269.57    7.20
   7   2  -1  266.47    7.40
   2  -1   7  268.97    6.80
  -7  -2  -1  277.27    7.10
  -2   1   7  267.47    6.70
  -1  -7  -2  273.77    7.30
   1   7  -2  254.27    6.70
  -1   7   2  277.87    7.20
  -7  -2  -1  267.17    7.40
   7   2  -1  267.87    6.70
   1  -7   2  248.28    7.10
   2  -1   7  265.67    7.30
  -7  -2   1  267.77    6.70
   2   1   7  256.67    7.10
   2   1   7  261.67    7.10
  -2   1  -7  266.07    7.30
  -7   2  -1  262.67    7.00
   2  -1  -7  273.47    7.20
  -2  -1   7  260.87    6.90
   1   7   2  261.17    7.30
   1   7   2  255.57    7.10
   1  -7  -2  281.67    7.30
   7   2   1  274.77    7.10
   2  -1  -7  262.57    6.70
   7  -2  -1  264.57    6.70
  -7   2  -1  271.67    7.40
  -7  -2   1  265.77    7.40
  -1   7  -2  263.87    7.20
   1   7   2  267.17    7.30
   7   2   1  259.47    7.40
   7  -2  -1  266.77    7.30
  -2  -1   7  257.07    6.70
  -1  -7   2  256.87    7.10
  -1   7  -2  266.47    6.60
  -1  -7   2  253.07    6.60
   2   1   7  266.17    7.20
   1  -7  -2  273.07    7.20
  -7  -3  -1   14.60    1.80
   7  -3   1   18.60    1.90
   7  -3   1   12.20    1.80
  -7  -3  -1   19.10    2.00
   7   3  -1   14.70    2.00
  -7   3   1   15.20    1.90
   3   1  -7   16.90    1.80
  -3  -1  -7   13.00    1.70
   1  -7   3   13.80    1.90
   1   7  -3   15.30    1.80
   3  -1   7   15.30    2.10
  -3   1   7   13.80    1.40
  -1  -7  -3   13.60    1.90
  -3   1   7   12.70    1.70
   1   7  -3   13.90    1.30
  -1   7   3   15.20    1.80
   3  -1   7   14.20    1.60
  -3  -1  -7   13.30    2.00
  -7   3   1   15.60    1.60
   3   1  -7   13.60    1.40
  -1   7   3   14.70    1.90
   7   3  -1   14.30    1.50
  -3   1  -7   15.30    1.50
  -1  -7   3   12.30    1.20
  -1  -7   3   13.50    1.90
  -1   7  -3   11.60    1.10
  -7  -3   1   13.90    1.90
   3  -1  -7   14.80    1.40
   3   1   7   16.60    1.80
  -7   3  -1   15.80    1.90
  -7   3  -1   13.80    1.80
   3   1   7   13.70    1.90
   1   7   3   14.40    1.90
   1   7   3   15.80    1.80
   1   7   3   11.50    1.80
   3  -1  -7   14.70    1.90
  -3  -1   7   13.30    1.40
   1  -7  -3   12.40    1.90
   7  -3  -1   15.80    2.00
   7  -3  -1   15.70    1.60
  -7  -3   1   13.00    1.60
  -1   7  -3   12.30    1.90
   7   3   1   14.70    2.00
   7   3   1   14.10    1.80
  -3  -1   7   12.80    1.60
   1  -7  -3   14.20    1.80
  -4  -1  -7  127.89    4.90
  -1  -7  -4  120.79    4.60
   1   7  -4  132.09    4.70
  -7   4   1  128.79    4.30
   7  -4   1  133.09    4.60
  -4  -1  -7  128.89    4.70
  -1   7   4  132.39    4.60
   1   7  -4  125.69    3.70
   4  -1   7  129.79    4.30
   4  -1   7  134.39    5.20
  -4   1   7  126.69    3.60
  -7  -4  -1  127.39    4.60
  -4   1   7  130.09    4.70
  -1   7   4  128.79    4.90
   4   1  -7  123.09    3.70
   7  -4   1  130.99    4.60
   7   4  -1  133.09    4.90
   1  -7   4  119.29    4.60
  -7  -4  -1  135.09    4.90
  -7   4   1  130.49    4.70
   4   1  -7  137.79    4.60
   7   4  -1  134.99    4.30
   7   4   1  128.59    4.60
   7   4   1  135.99    5.00
  -4   1  -7  126.99    4.40
   4  -1  -7  123.19    3.60
  -7   4  -1  133.59    4.70
   1  -7  -4  126.59    4.70
  -7  -4   1  127.39    4.80
   7  -4  -1  129.79    4.30
   1  -7  -4  127.89    4.70
   1   7   4  128.19    4.90
   1   7   4  127.29    4.60
   7  -4  -1  130.99    4.80
   4  -1  -7  128.19    4.60
  -1  -7   4  123.09    3.70
  -1  -7   4  120.59    4.60
  -1   7  -4  122.59    3.30
  -4  -1   7  130.79    4.60
  -7   4  -1  129.49    4.50
  -4  -1   7  126.99    3.60
   1   7   4  130.59    4.70
   4   1   7  127.49    4.40
   4   1   7  120.59    4.60
  -1   7  -4  121.09    4.60
  -7  -4   1  131.99    4.30
  -1   7   5   52.09    3.60
  -1   7   5   45.80    3.40
  -7  -5  -1   49.99    3.70
   5  -1   7   49.30    3.20
  -7  -5  -1   40.10    3.20
  -5   1   7   45.50    3.70
   1   7  -5   42.30    3.40
  -5  -1  -7   50.59    3.60
  -7   5   1   48.20    3.70
  -5   1   7   46.30    1.90
  -1  -7  -5   46.00    3.30
  -5  -1  -7   48.10    3.80
   7   5  -1   43.20    3.10
   7  -5   1   48.40    3.40
   1  -7   5   44.40    3.30
   5  -1   7   45.10    3.80
   5   1  -7   52.49    3.50
   1   7  -5   45.60    2.30
  -7   5   1   52.79    3.20
   7   5  -1   40.20    3.50
   7  -5   1   48.50    3.30
   5  -1  -7   48.20    2.00
   7  -5  -1   47.50    3.00
   7  -5  -1   45.00    3.30
  -5  -1   7   39.70    3.40
  -1   7  -5   44.50    3.60
   7   5   1   47.40    3.30
   5  -1  -7   44.70    3.40
   1   7   5   42.30    3.60
  -7  -5   1   50.69    3.10
  -7  -5   1   47.30    3.80
  -1  -7   5   44.80    2.10
   5   1   7   42.20    3.50
   5   1   7   49.99    3.50
  -5   1  -7   42.80    3.10
   1  -7  -5   50.59    3.40
  -7   5  -1   42.90    3.30
   7   5   1   60.89    4.00
   1   7   5   38.00    2.60
  -1  -7   5   44.70    3.20
  -5  -1   7   41.20    2.00
  -7   5  -1   49.70    3.40
   1  -7  -5   44.50    3.20
   7  -6   1  438.26   10.90
  -7   6   1  452.55   11.20
  -7   6   1  441.46   10.80
  -6  -1  -7  439.16   11.20
   1   7  -6  416.86   10.00
   1  -7   6  434.96   11.00
   7  -6   1  447.66   11.00
  -6  -1  -7  422.26   11.20
   1   7  -6  431.86   10.90
  -7  -6  -1  442.76   11.30
   6  -1   7  405.76   11.10
   6  -1   7  434.46   10.80
  -1  -7  -6  430.36   11.10
   7   6  -1  425.86   11.20
   7   6  -1  410.26   10.60
   6   1  -7  410.66   11.00
  -1   7   6  425.66   10.90
  -7  -6  -1  432.46   10.90
  -6   1   7  432.86   11.20
   7  -6  -1  440.96   10.80
  -7   6  -1  434.46   10.90
   6   1   7  429.76   11.10
  -7   6  -1  438.76   11.00
   1   7   6  420.46   10.90
   7   6   1  436.26   11.30
  -6   1  -7  445.36   10.90
  -1   7  -6  435.76   11.10
   7   6   1  430.36   10.90
   1  -7  -6  437.56   11.30
   1  -7  -6  436.66   10.90
   7  -6  -1  434.96   11.10
  -7  -6   1  411.56   11.10
  -1  -7   6  437.66   10.80
  -1  -7   6  412.76    9.90
  -6  -1   7  444.36   11.20
   6  -1  -7  424.66   11.10
  -7  -6   1  419.86   10.60
  -2  -7   0    0.30    1.50
   2  -7   0    1.70    1.60
   7   0  -2    0.30    1.00
   2   7   0    0.00    1.40
   0  -2   7    0.00    1.40
   0   2  -7    0.00    1.10
  -2   7   0    0.20    1.20
   0   2   7    1.00    1.40
   7   0   2    0.90    1.60
  -2  -7   0    0.00    1.20
   0  -2  -7    0.00    1.40
   2   7   0    1.30    1.50
   7   0  -2    0.50    1.60
   7   0  -2    1.20    1.10
  -7   0  -2    2.00    1.50
  -7   0   2    0.00    1.50
  -2   7   0    0.00    1.50
   0  -2   7    0.50    1.10
   0   2   7    0.00    1.30
   2  -7   0    0.00    1.20
   7   0   2    0.00    1.50
   0  -2  -7    1.00    1.40
   0   2  -7    1.90    1.50
   7   0   2    0.00    1.50
  -1   2   7  268.57    6.80
  -2  -7  -1  253.07    7.00
   7   1  -2  266.37    6.50
  -2   7   1  258.17    7.00
  -7   1   2  258.87    7.40
   1  -2   7  261.87    6.70
  -7  -1  -2  262.87    7.10
  -2   7   1  273.57    7.20
  -1  -2  -7  272.87    7.30
   7  -1   2  257.47    7.20
   2  -7   1  267.37    6.70
   2  -7   1  259.47    7.10
   1  -2   7  275.97    7.20
   1   2  -7  266.27    6.80
  -2  -7  -1  260.07    7.10
   2   7  -1  268.37    7.20
  -1  -2  -7  262.87    7.10
  -7  -1  -2  269.37    7.40
   7  -1   2  275.57    7.20
   2   7  -1  246.38    6.80
  -1   2   7  267.77    7.30
   7   1  -2  265.57    7.40
  -7   1   2  264.07    6.50
   2   7   1  265.17    7.20
  -7   1  -2  261.37    7.20
   1  -2  -7  275.17    7.30
  -7  -1   2  268.67    7.40
  -7   1  -2  269.37    7.20
  -1  -2   7  263.77    6.70
  -2   7  -1  250.17    6.70
  -1   2  -7  263.57    6.70
   1  -2  -7  265.57    6.90
   1   2   7  267.07    7.10
   2  -7  -1  266.47    7.00
   2  -7  -1  269.27    7.20
   1   2   7  267.07    7.10
   7   1   2  270.57    7.30
   7   1   2  270.77    7.10
  -1  -2   7  269.07    6.80
  -1   2  -7  264.57    7.10
   7  -1  -2  262.47    7.40
  -2  -7   1  258.67    7.10
  -2  -7   1  258.07    6.90
  -2   7  -1  262.17    7.30
   2   7   1  248.68    7.10
  -7  -1   2  266.57    6.50
  -7  -2  -2    0.00    1.60
   7   2  -2    0.00    1.60
   2   7  -2    1.00    1.30
  -7   2   2    1.50    1.60
   7   2  -2    0.40    1.10
  -2  -7  -2    2.80    1.40
  -7  -2  -2    1.10    1.50
   2  -2   7    0.00    1.10
   2  -2   7    0.00    1.10
   2  -2   7    0.00    1.70
   2   2  -7    1.70    1.30
   2   2  -7    0.00    1.30
  -2   2   7    0.70    1.20
  -7   2   2    0.30    1.20
  -2   7   2    1.80    1.60
  -2  -7  -2    0.00    1.60
  -2  -2  -7    0.70    1.60
   2   7  -2    0.50    1.50
  -2   7   2    0.90    1.40
  -2   2   7    1.00    1.50
   7  -2   2    0.50    1.60
   7  -2   2    0.30    1.60
   2  -7   2    0.00    1.50
   2  -7   2    0.80    1.00
  -2   7  -2    0.00    1.00
   2  -7  -2    0.00    1.60
   7   2   2    0.30    1.60
   2   2   7    0.00    1.50
  -7  -2   2    0.20    1.50
  -7  -2   2    0.00    1.10
  -7   2  -2    0.00    1.50
  -2  -7   2    0.00    1.10
   7  -2  -2    1.20    1.20
   2  -2  -7    1.80    1.30
   2   2   7    0.00    1.40
   2   7   2    2.20    1.60
   2  -7  -2    1.90    1.50
   7  -2  -2    0.70    1.60
  -2   7  -2    0.30    1.60
   7   2   2    0.00    1.50
   2   2   7    0.30    1.40
   2   7   2    0.00    1.50
  -2  -7   2    1.20    1.60
  -7   2  -2    0.00    1.60
   2  -2  -7    0.70    1.50
  -2   2  -7    0.00    1.70
  -2  -2   7    0.00    1.20
  -2  -2   7    0.00    1.20
   3  -2   7   25.80    2.30
   3  -2   7   23.90    1.70
   7   3  -2   22.20    1.60
   7   3  -2   27.80    2.30
  -3  -2  -7   23.30    2.00
  -7  -3  -2   24.70    2.20
  -7   3   2   22.30    2.20
  -7   3   2   23.90    1.70
   2  -7   3   25.10    2.20
  -3  -2  -7   24.70    2.30
  -7  -3  -2   23.90    2.10
   2   7  -3   23.90    2.10
  -2   7   3   22.30    2.00
  -2   7   3   23.60    2.10
  -2  -7  -3   23.80    2.00
   3   2  -7   25.90    1.90
   3   2  -7   24.20    1.70
   2   7  -3   27.80    2.40
   2  -7   3   25.50    1.80
  -2  -7  -3   21.80    2.10
  -3   2   7   25.50    2.10
   7  -3   2   28.10    2.10
   7  -3   2   25.20    2.20
  -3   2   7   27.20    2.10
   7  -3  -2   27.70    1.80
  -7   3  -2   25.00    2.20
  -3   2  -7   26.80    1.70
   7  -3  -2   25.40    2.30
  -2  -7   3   20.00    1.50
  -2  -7   3   24.50    2.10
  -2   7  -3   21.90    1.80
  -3   2  -7   29.60    2.40
  -3  -2   7   23.30    1.80
  -7  -3   2   23.30    2.10
   3   2   7   21.80    2.20
  -7   3  -2   27.10    2.10
  -7  -3   2   25.30    2.30
   7   3   2   23.50    2.10
   3   2   7   28.30    2.20
  -2   7  -3   23.80    2.20
   2   7   3   22.00    2.20
   2   7   3   21.30    2.10
   3  -2  -7   27.60    2.20
   3  -2  -7   27.50    2.20
  -3  -2   7   22.00    1.60
   2  -7  -3   26.30    2.10
   2  -7  -3   25.50    2.10
   7   3   2   23.10    2.30
   7   4  -2 1063.49   24.80
   2   7  -4 1068.29   25.00
   2   7  -4 1127.09   25.30
  -7  -4  -2 1135.69   25.80
   2  -7   4 1098.49   24.60
  -4   2   7 1092.39   25.70
  -4   2   7 1105.69   24.60
  -2  -7  -4 1080.29   25.40
   2  -7   4 1055.69   25.30
  -7   4   2 1118.69   25.00
  -4  -2  -7 1141.29   25.70
  -4  -2  -7 1123.79   25.50
  -7   4   2 1140.19   25.80
   7  -4   2 1131.19   25.50
   7  -4   2 1133.19   25.30
   7   4  -2 1147.49   25.80
  -7  -4  -2 1092.29   25.30
   4  -2   7 1155.48   25.60
  -2   7   4 1114.09   25.30
   4   2  -7 1082.79   24.60
  -2   7   4 1108.69   25.70
   4   2  -7 1095.29   25.40
   4  -2   7 1109.89   25.20
  -2   7  -4 1059.79   24.60
  -4  -2   7 1104.59   25.40
  -4   2  -7 1120.99   25.60
   2   7   4 1152.68   25.90
  -2  -7   4 1061.79   24.90
  -7   4  -2 1129.29   25.40
  -2  -7   4 1087.39   25.20
   7   4   2 1112.39   25.30
  -2   7  -4 1069.89   25.40
   2  -7  -4 1134.79   25.70
   4  -2  -7 1106.19   25.70
   7  -4  -2 1144.49   24.90
  -4   2  -7 1120.79   25.20
   4   2   7 1130.69   25.70
   4   2   7 1096.79   25.50
   7  -4  -2 1139.59   25.80
   4  -2  -7 1087.19   24.60
   2  -7  -4 1111.09   25.30
  -4  -2   7 1095.79   24.60
  -7   4  -2 1137.99   25.50
   7   4   2 1140.09   25.90
  -7  -4   2 1092.19   25.70
  -7  -4   2 1104.79   24.90
   2   7   4 1111.29   25.40
   5  -2   7   71.49    4.20
  -7   5   2   76.89    3.40
  -7  -5  -2   72.59    4.10
  -5   2   7   74.79    2.60
  -2   7   5   67.89    3.70
   7  -5   2   70.59    3.60
   7  -5   2   66.39    3.60
   7   5  -2   72.59    3.90
   2  -7   5   69.49    3.80
  -5  -2  -7   71.79    4.10
  -5  -2  -7   66.99    4.10
   5  -2   7   73.89    3.30
  -7   5   2   75.19    4.20
   5   2  -7   68.99    3.60
   5   2  -7   72.89    2.60
  -2  -7  -5   73.29    4.00
   7   5  -2   64.89    3.20
  -7  -5  -2   73.49    3.80
   2   7  -5   66.39    2.90
   2   7  -5   66.69    3.70
  -5   2   7   78.79    4.00
  -2   7   5   70.89    4.10
   2   7   5   75.49    4.30
   2   7   5   75.09    4.20
  -2  -7   5   71.39    3.60
  -5   2  -7   75.19    3.50
   5  -2  -7   71.59    2.60
  -2  -7   5   68.79    2.80
  -5  -2   7   70.29    2.50
  -5   2  -7   70.19    4.30
   2   7   5   66.09    3.80
  -7  -5   2   71.99    3.90
  -7  -5   2   71.39    3.30
  -2   7  -5   67.19    4.10
   7   5   2   72.59    3.90
   5   2   7   74.39    4.10
   7  -5  -2   70.09    4.00
   7  -5  -2   72.99    3.30
   7   5   2   72.49    4.10
  -5  -2   7   66.89    3.70
  -7   5  -2   69.79    3.80
   5   2   7   74.89    4.10
  -7   5  -2   61.79    3.90
   5  -2  -7   70.99    3.90
   2  -7  -5   70.29    3.90
   2  -7  -5   74.69    3.70
  -2  -7  -6  799.02   19.30
  -6  -2  -7  793.12   19.40
   7   6  -2  810.42   18.90
   7   6  -2  839.52   19.60
   2   7  -6  791.92   18.60
   2   7  -6  838.62   19.10
  -7   6   2  842.52   19.00
  -6   2   7  832.12   18.20
  -6  -2  -7  851.71   19.60
   2  -7   6  817.72   19.30
  -7   6   2  840.72   19.50
   7  -6   2  809.72   19.10
   7  -6   2  829.62   19.30
   6  -2   7  809.82   19.00
   6   2  -7  821.32   19.40
  -2   7   6  793.42   19.00
  -7  -6  -2  816.82   19.20
   6  -2   7  785.92   19.40
   6   2  -7  804.12   18.10
  -7  -6   2  813.22   18.90
   6   2   7  819.42   19.50
   2   7   6  824.42   19.70
   7  -6  -2  830.32   18.90
  -7   6  -2  830.32   19.30
   7   6   2  832.82   19.30
  -7  -6   2  782.92   19.30
  -7   6  -2  841.02   19.20
  -6  -2   7  839.52   19.40
  -6   2  -7  835.32   19.10
   6  -2  -7  802.92   18.20
  -2  -7   6  821.12   19.00
  -2  -7   6  778.92   18.50
   7   6   2  835.62   19.70
   6  -2  -7  819.72   19.60
   2  -7  -6  799.62   19.60
   2  -7  -6  824.42   19.10
   7  -6  -2  798.52   19.40
   0  -3   7    5.20    1.10
   3  -7   0    3.70    1.40
   3  -7   0    3.60    1.70
  -3   7   0    5.40    1.40
  -3   7   0    5.20    1.60
   0  -3  -7    5.90    1.70
  -3  -7   0    5.00    1.70
   7   0   3    3.80    1.70
  -7   0   3    1.50    1.60
  -3  -7   0    4.70    1.40
   0   3   7    3.70    1.50
   7   0   3    4.80    1.80
  -7   0  -3    4.50    1.60
   0   3  -7    5.80    1.10
   0   3  -7    4.10    1.60
   0   3   7    5.10    1.60
   0  -3   7    4.40    1.50
   7   0  -3    4.50    1.00
   3   7   0    4.80    1.60
   7   0  -3    7.40    1.80
   3   7   0    3.20    1.60
   0  -3  -7    5.30    1.60
   7   0   3    5.90    1.70
   7   0  -3    5.30    1.00
   7   1  -3   13.90    2.00
   3   7  -1   12.20    1.70
  -1  -3  -7   14.10    1.90
  -7  -1  -3   18.20    1.90
   1   3  -7   12.20    1.70
   7   1  -3   14.80    1.10
   3  -7   1   14.90    1.50
  -3   7   1   12.90    1.60
   1  -3   7   14.40    1.20
  -7   1   3   14.80    2.00
  -7   1   3   13.80    1.20
  -1   3   7   13.30    1.60
  -3  -7  -1   13.40    1.90
  -1  -3  -7   16.60    1.90
   1  -3   7   12.00    1.80
   3   7  -1   11.50    1.80
  -3  -7  -1   14.00    1.70
  -7  -1  -3   12.40    1.90
   7  -1   3   13.10    1.80
  -1   3   7   13.70    1.80
   3  -7   1   16.00    2.00
   1   3  -7   13.60    1.40
   7  -1   3   12.90    2.00
  -3   7   1   16.30    1.90
  -7   1  -3   14.60    1.80
   7  -1  -3   15.20    1.20
  -3  -7   1   14.60    1.90
   1   3   7   14.90    1.80
  -1  -3   7   10.60    1.60
   7   1   3   12.80    1.90
  -1   3  -7   12.90    1.90
   1   3   7   12.70    1.80
   3   7   1   12.40    1.80
   3  -7  -1   15.80    1.90
  -7  -1   3   14.90    1.20
   7   1   3   14.00    1.90
  -7   1  -3   13.80    2.00
   7  -1  -3   15.60    2.10
  -7  -1   3   14.30    1.90
  -1   3  -7   13.10    1.20
   3   7   1   12.00    1.80
   3  -7  -1   16.40    1.70
   1  -3  -7   14.50    1.90
   1  -3  -7   13.80    1.70
  -3   7  -1   12.10    1.40
  -1  -3   7   14.80    1.30
  -3  -7   1   11.60    1.50
  -3   7  -1   12.20    1.90
   7   2  -3   28.70    2.30
  -7   2   3   22.50    2.20
   7  -2   3   26.20    2.00
  -2   3   7   23.70    2.10
  -3  -7  -2   24.30    2.20
   2   3  -7   23.80    1.70
   3   7  -2   25.20    2.00
   3  -7   2   24.70    2.20
  -7  -2  -3   21.00    2.20
  -3   7   2   22.50    2.00
   2   3  -7   23.70    1.80
   2  -3   7   26.50    2.10
   7   2  -3   24.70    2.00
  -7  -2  -3   27.60    2.20
  -3  -7  -2   23.10    2.00
   2  -3   7   27.90    2.10
   2  -3   7   23.70    2.20
  -7   2   3   25.70    2.00
   3   7  -2   24.60    1.90
  -3   7   2   26.00    2.10
  -2   3   7   28.30    2.30
   7  -2   3   21.00    2.20
   3  -7   2   24.20    2.20
  -2  -3  -7   25.20    2.20
  -7  -2   3   24.50    2.20
   2   3   7   21.10    2.10
   3   7   2   25.50    2.20
  -3   7  -2   23.20    2.10
  -3  -7   2   20.20    1.70
  -3  -7   2   23.70    2.10
   7   2   3   24.60    2.20
   2   3   7   26.10    2.20
  -3   7  -2   23.90    2.20
   2  -3  -7   26.00    2.20
   3  -7  -2   23.30    2.00
  -2  -3   7   27.20    2.40
   3   7   2   23.30    2.10
   7   2   3   22.20    2.10
   7  -2  -3   26.70    1.90
   3  -7  -2   26.80    2.10
   2  -3  -7   24.50    1.80
   2   3   7   27.20    2.10
  -2   3  -7   22.70    2.20
  -7   2  -3   26.10    2.30
   7  -2  -3   27.40    2.30
  -7   2  -3   28.00    2.10
  -2  -3   7   23.90    1.80
  -7  -2   3   24.70    1.90
  -3   3   7    0.90    1.20
   7   3  -3    0.50    1.80
  -7   3   3    0.00    1.20
  -3   7   3    0.00    1.50
   3  -7   3    0.20    1.00
   3  -7   3    0.00    1.60
  -3   7   3    0.00    1.60
   7  -3   3    0.00    1.50
   3   3  -7    1.10    1.40
   3   3  -7    0.30    1.30
  -3  -7  -3    0.00    1.70
  -7   3   3    0.00    1.70
  -3   3   7    0.00    1.60
   3  -3   7    0.00    1.70
  -7  -3  -3    0.00    1.60
   7  -3   3    0.00    1.80
   3   7  -3    2.10    1.40
   3   7  -3    0.00    1.60
  -3  -3  -7    0.00    1.80
  -7  -3  -3    1.10    1.80
   3  -3   7    0.00    1.10
   7   3  -3    0.00    1.10
  -3  -3  -7    1.00    1.50
  -3  -7  -3    0.00    1.50
   3  -3  -7    0.00    1.30
   7   3   3    0.00    1.70
  -3  -7   3    0.00    1.20
  -7  -3   3    0.30    1.20
  -3   7  -3    0.40    1.70
  -7   3  -3    0.00    1.80
   3   3   7    1.10    1.70
  -7  -3   3    0.00    1.50
   7  -3  -3    1.10    1.80
  -7   3  -3    0.00    1.60
   3   7   3    0.10    1.70
   3   7   3    0.80    1.70
  -3   7  -3    1.20    1.10
   7  -3  -3    0.00    1.20
   3  -7  -3    1.50    1.60
  -3  -3   7    0.00    1.30
  -3  -3   7    0.00    1.20
  -3   3  -7    0.00    1.10
  -3   3  -7    0.00    1.80
  -3  -7   3    0.20    1.60
   7   3   3    0.00    1.70
   3  -7  -3    0.20    1.60
   3   3   7    2.90    1.80
   3  -3  -7    0.30    1.70
  -3   7   4  209.38    6.40
  -3  -7  -4  194.08    6.20
   3   7  -4  197.38    5.70
   7  -4   3  201.28    5.90
   4  -3   7  197.28    6.40
  -7  -4  -3  210.98    6.40
  -7  -4  -3  198.28    6.00
  -3   7   4  209.58    6.10
   7   4  -3  197.58    5.40
   4  -3   7  202.38    5.50
   3  -7   4  194.48    5.00
   3  -7   4  193.68    6.10
   3   7  -4  201.68    6.00
  -7   4   3  211.98    5.60
  -4  -3  -7  204.68    6.50
  -4  -3  -7  194.18    6.20
  -3  -7  -4  203.08    6.40
  -4   3   7  211.88    6.40
  -4   3   7  200.48    5.30
   4   3  -7  196.28    5.80
   4   3  -7  202.48    5.40
   7  -4   3  202.98    6.30
  -7   4   3  203.58    6.40
   7   4  -3  191.88    6.20
   7  -4  -3  207.48    6.40
  -3   7  -4  194.38    5.10
  -3   7  -4  203.28    6.40
  -3  -7   4  192.28    5.50
  -4  -3   7  204.38    5.90
   3  -7  -4  218.28    6.40
   3  -7  -4  204.08    6.00
  -7   4  -3  205.78    6.00
   7  -4  -3  205.58    5.50
  -7  -4   3  197.08    5.40
   7   4   3  216.78    6.30
   4   3   7  210.88    6.50
  -7  -4   3  198.48    6.20
   4   3   7  206.38    6.40
  -3  -7   4  213.18    6.10
  -7   4  -3  201.58    6.30
  -4  -3   7  199.08    5.30
   3   7   4  201.58    6.40
   3   7   4  193.98    6.40
   4  -3  -7  200.78    6.30
  -4   3  -7  200.68    6.50
   7   4   3  206.58    6.50
  -4   3  -7  206.28    5.60
   4  -3  -7  196.08    5.40
  -5   3   7   29.00    2.50
  -7   5   3   28.50    2.50
  -3   7   5   29.50    2.30
  -7  -5  -3   28.40    2.50
  -7   5   3   29.50    2.10
  -5  -3  -7   26.70    2.70
   5  -3   7   28.00    1.90
   5  -3   7   30.60    2.80
   5   3  -7   30.60    2.40
   7  -5   3   28.60    2.20
   3  -7   5   27.00    2.60
   3   7  -5   27.80    2.50
   3   7  -5   27.40    2.30
   5   3  -7   30.10    2.20
  -3  -7  -5   32.50    2.60
   7   5  -3   26.00    2.50
   7   5  -3   28.20    2.00
   7  -5   3   32.90    2.60
  -3   7   5   27.10    2.50
  -5  -3  -7   28.70    2.40
  -5   3   7   29.50    2.30
   7  -5  -3   32.40    2.60
   7  -5  -3   33.70    2.10
   5  -3  -7   28.20    2.30
  -5   3  -7   28.30    2.00
   5   3   7   25.60    2.50
   7   5   3   25.40    2.60
  -3  -7   5   32.50    3.00
  -3   7  -5   23.60    1.70
   7   5   3   27.00    2.50
  -7  -5   3   28.50    2.00
   3  -7  -5   31.50    2.60
   3  -7  -5   28.90    2.30
   5  -3  -7   30.80    2.60
  -3  -7   5   26.00    1.80
  -5  -3   7   27.80    2.20
  -5  -3   7   30.20    2.10
   3   7   5   26.00    2.50
  -7   5  -3   32.00    2.60
  -7  -5   3   31.30    2.40
  -7   5  -3   28.90    2.20
   3  -7   6  295.77    8.60
   6  -3   7  309.67    8.10
   7  -6   3  311.17    8.30
   7  -6   3  301.57    8.50
   7   6  -3  326.47    8.80
   7   6  -3  306.97    8.10
   6   3  -7  321.97    7.50
  -6  -3  -7  289.17    8.70
   6  -3   7  311.67    8.80
   6   3  -7  308.37    8.60
  -7   6   3  322.37    8.20
  -6   3   7  310.47    7.50
  -3  -7  -6  317.37    8.80
  -7  -6  -3  312.07    8.70
   3   7  -6  295.87    7.90
  -3   7   6  316.17    8.40
   3   7  -6  320.17    8.40
  -3  -7   6  304.17    7.90
  -3  -7   6  317.47    8.20
   6   3   7  313.67    8.80
  -7  -6   3  309.27    8.20
  -7   6  -3  317.77    8.40
   7   6   3  313.17    9.00
  -6  -3   7  312.57    7.40
  -6   3  -7  320.27    8.20
  -7  -6   3  304.67    8.50
   3   7   6  313.27    9.00
   6  -3  -7  310.97    7.50
   7  -6  -3  325.87    8.20
  -6  -3   7  295.07    8.40
   7  -6  -3  310.27    8.70
   6  -3  -7  316.47    8.90
   3  -7  -6  306.07    8.80
   3  -7  -6  316.57    8.30
   4  -7   0    0.00    1.40
   4  -7   0    0.30    1.60
   0   4  -7    0.00    0.90
  -4  -7   0    0.40    1.60
   4   7   0    0.00    1.60
  -4   7   0    0.60    1.60
   0  -4  -7    0.00    1.60
   0  -4  -7    0.20    1.60
   0  -4   7    0.00    0.90
  -4   7   0    0.00    1.40
   7   0  -4    0.00    1.70
   7   0   4    1.50    1.60
   7   0   4    0.70    1.90
   0  -4   7    0.00    1.60
   0   4   7    0.20    1.40
  -7   0  -4    0.10    1.60
  -7   0   4    0.00    1.70
  -4  -7   0    0.00    1.30
   7   0   4    0.00    1.70
   0   4  -7    0.00    1.60
   0   4   7    0.30    1.60
   4   7   0    0.00    1.60
  -7  -1  -4  140.69    5.10
   1   4  -7  120.49    4.50
  -1  -4  -7  130.39    4.60
  -1   4   7  129.99    4.40
   1   4  -7  122.09    3.80
  -4  -7  -1  133.99    4.90
   7  -1   4  133.09    4.70
   7  -1   4  129.19    5.00
   7   1  -4  133.49    4.80
  -7  -1  -4  118.49    4.60
  -4  -7  -1  130.99    4.70
   4  -7   1  128.89    4.50
  -4   7   1  126.09    4.50
  -4   7   1  137.69    4.60
   1  -4   7  122.69    3.60
  -1  -4  -7  134.29    4.80
  -7   1   4  131.89    4.90
   4   7  -1  129.49    4.70
   4   7  -1  125.89    4.70
   1  -4   7  127.99    4.60
   4  -7   1  131.69    4.20
  -1   4   7  128.69    4.80
  -1   4  -7  125.79    4.70
   4   7   1  123.59    4.50
  -4  -7   1  131.69    4.70
   7   1   4  127.19    4.80
   1   4   7  136.79    5.00
  -1   4  -7  124.29    3.60
   1  -4  -7  136.59    5.00
   1  -4  -7  124.19    4.40
   7   1   4  133.89    4.80
  -1  -4   7  126.39    4.30
  -4   7  -1  128.19    4.60
  -1  -4   7  126.49    3.80
  -7  -1   4  135.09    4.90
   4   7   1  134.39    4.90
   1   4   7  132.29    4.60
   4  -7  -1  132.59    4.50
   4  -7  -1  129.89    4.60
  -4  -7   1  128.49    4.60
  -7   1  -4  131.89    4.60
   7  -1  -4  139.59    5.00
   7  -1  -4  132.79    3.40
  -4   7  -1  137.89    4.40
   7  -2   4 1066.59   25.10
   2  -4   7 1070.19   24.50
   4   7  -2 1082.19   24.90
  -2   4   7 1088.69   24.70
  -4   7   2 1070.09   25.20
   2  -4   7 1110.79   24.50
  -2  -4  -7 1131.39   25.20
   2  -4   7 1102.49   25.20
  -7  -2  -4 1074.29   25.10
   7   2  -4 1093.99   24.20
   4   7  -2 1070.49   25.10
   4  -7   2 1068.29   25.10
   7  -2   4 1114.49   25.20
  -7   2   4 1115.59   25.50
  -7   2   4 1096.89   24.20
  -4  -7  -2 1104.89   25.40
  -4  -7  -2 1072.39   25.10
  -4   7   2 1106.99   25.00
  -2   4   7 1097.49   25.50
   7   2  -4 1104.39   25.50
  -7  -2  -4 1137.29   25.50
   2   4  -7 1059.49   24.70
   2   4  -7 1104.19   24.80
   4  -7   2 1101.29   24.80
   4  -7  -2 1112.49   25.00
  -7  -2   4 1094.39   25.40
  -7  -2   4 1091.09   24.20
  -4   7  -2 1064.59   25.10
   2  -4  -7 1104.29   24.80
  -4  -7   2 1106.19   25.00
  -4   7  -2 1081.69   24.80
   2  -4  -7 1144.59   25.50
  -7   2  -4 1132.29   25.30
   2   4   7 1137.09   25.20
   4  -7  -2 1123.39   25.30
  -2  -4   7 1073.39   24.80
  -2  -4   7 1094.39   24.70
   4   7   2 1043.70   25.00
   7  -2  -4 1128.09   25.60
   7  -2  -4 1125.09   24.20
  -7   2  -4 1134.49   25.30
  -2   4  -7 1038.00   25.10
   7   2   4 1107.49   25.20
  -4  -7   2 1059.89   25.10
   2   4   7 1113.79   25.60
   7   2   4 1160.68   25.60
   4   7   2 1079.69   25.40
   7  -3   4  196.58    6.30
   3   4  -7  188.88    5.50
   7   3  -4  192.88    5.10
  -7  -3  -4  218.78    6.50
   7   3  -4  205.78    6.40
  -7   3   4  211.08    6.50
  -4  -7  -3  201.28    6.50
  -4  -7  -3  199.18    6.10
   4  -7   3  215.28    6.40
  -3   4   7  198.38    6.30
   7  -3   4  209.48    5.90
  -4   7   3  204.98    6.10
  -4   7   3  199.18    6.10
  -7   3   4  204.98    5.20
  -7  -3  -4  206.08    6.30
   3  -4   7  193.28    5.20
   3  -4   7  208.58    6.40
   4   7  -3  202.98    6.00
   3   4  -7  192.78    5.50
  -3  -4  -7  203.28    6.40
  -3  -4  -7  202.48    6.20
   4   7  -3  197.08    6.00
  -3   4   7  200.98    5.50
   4  -7   3  193.48    5.30
  -4  -7   3  188.78    5.70
   4  -7  -3  207.78    6.00
  -3  -4   7  199.38    5.60
  -3  -4   7  203.68    5.60
  -3   4  -7  197.48    5.20
  -3   4  -7  204.78    6.40
  -4  -7   3  207.98    6.10
  -7  -3   4  207.18    6.40
   7   3   4  211.68    6.30
   3  -4  -7  198.08    5.60
  -7   3  -4  204.68    6.40
  -4   7  -3  196.28    5.40
   4   7   3  202.18    6.40
   3  -4  -7  203.18    6.30
   7   3   4  206.18    6.40
  -4   7  -3  195.08    6.40
   3   4   7  191.48    6.60
   3   4   7  205.08    6.30
   4  -7  -3  201.88    6.10
   4   7   3  204.88    6.40
  -7  -3   4  195.18    5.20
   7  -3  -4  205.38    6.50
   7  -3  -4  204.98    5.20
  -7   3  -4  210.08    6.00
  -4  -4  -7    0.00    1.90
   7   4  -4    0.40    1.20
   4   4  -7    0.00    1.60
  -4  -4  -7    0.00    1.70
  -4   7   4    0.00    1.70
   7  -4   4    0.80    1.60
  -7   4   4    0.00    1.30
  -7  -4  -4    0.00    1.80
  -4   4   7    0.00    1.30
   7  -4   4    0.00    1.90
   4   4  -7    0.00    1.40
  -4   4   7    0.00    1.80
  -7  -4  -4    0.00    1.90
   7   4  -4    1.70    1.90
   4   7  -4    0.20    1.60
  -4   7   4    0.60    1.70
   4  -4   7    0.00    1.10
  -7   4   4    0.40    1.80
   4  -7   4    0.20    1.10
   4  -7   4    0.00    1.80
  -4  -7  -4    0.00    1.80
   4  -4   7    0.00    1.90
   4   7  -4    1.50    1.60
  -4  -7  -4    0.10    1.70
   4  -4  -7    0.00    1.80
   7  -4  -4    0.70    1.30
   7  -4  -4    0.50    1.90
   4  -4  -7    0.00    1.30
   4   7   4    0.00    1.90
  -4   4  -7    0.10    1.20
  -7  -4   4    0.00    1.20
  -4   4  -7    0.60    1.90
   4  -7  -4    0.00    1.70
   4  -7  -4    1.00    1.70
  -7  -4   4    0.00    1.70
   7   4   4    0.10    2.00
  -4  -7   4    0.10    1.40
  -4  -7   4    0.60    1.70
  -7   4  -4    0.10    1.60
  -7   4  -4    0.00    2.00
  -4  -4   7    0.30    1.50
   7   4   4    0.30    1.90
   4   4   7    0.00    1.90
   4   7   4    0.10    1.90
   4   4   7    1.20    1.90
  -4  -4   7    0.80    1.30
  -4   7  -4    1.70    1.20
   4   7  -5  681.53   16.30
   5   4  -7  711.73   16.50
  -4  -7  -5  692.03   16.80
  -4   7   5  696.93   16.40
   5   4  -7  696.03   15.80
   7   5  -4  698.93   16.80
   5  -4   7  668.63   16.70
   4  -7   5  705.33   16.80
  -5   4   7  691.03   15.80
   7  -5   4  703.93   16.70
   5  -4   7  683.03   16.00
   4  -7   5  680.23   15.70
   7  -5   4  689.23   16.40
   7   5  -4  699.43   16.00
  -7  -5  -4  695.63   16.70
  -5  -4  -7  674.93   16.70
   4   7  -5  657.63   16.20
  -7   5   4  701.93   16.00
  -7   5  -4  694.03   16.40
  -7  -5   4  702.93   16.80
  -5  -4   7  673.03   16.40
  -5  -4   7  686.03   15.80
   7  -5  -4  708.93   16.90
   7  -5  -4  717.13   16.00
   7   5   4  719.23   17.10
  -4   7  -5  675.63   15.70
   4  -7  -5  717.73   16.40
   4  -7  -5  675.33   16.80
   5  -4  -7  685.53   15.90
  -7  -5   4  695.23   16.00
  -5   4  -7  713.63   16.10
  -4  -7   5  653.13   16.20
  -4  -7   5  715.43   16.40
   4   7   5  683.93   17.00
   5  -4  -7  696.73   16.90
   5   4   7  695.13   16.90
   4  -7   6 4262.37   94.59
   7  -6   4 4303.97   94.79
  -4  -7  -6 4089.69   94.69
   6   4  -7 4384.86   93.89
   4   7  -6 4250.17   94.29
   7   6  -4 4306.47   95.59
  -7   6   4 4382.26   94.19
  -6   4   7 4285.47   93.89
   6   4  -7 4255.57   95.49
  -7  -6  -4 4152.58   94.69
   7   6  -4 4257.87   94.09
   4  -7   6 4324.07   94.79
   7  -6   4 4252.77   95.19
  -4   7   6 4271.17   94.29
   4   7  -6 4247.98   95.09
   6  -4   7 4312.17   95.09
   6  -4   7 4170.48   94.79
  -6  -4  -7 4337.27   94.89
   6  -4  -7 4351.96   93.89
   6  -4  -7 4350.56   95.89
   4  -7  -6 4379.66   94.39
   7  -6  -4 4244.98   95.79
   4   7   6 4395.36   95.89
   4  -7  -6 4326.87   95.79
  -4  -7   6 4174.68   95.09
   6   4   7 4422.36   95.89
  -4  -7   6 4320.67   94.29
  -4   7  -6 4285.07   94.59
  -6  -4   7 4309.97   95.49
  -6   4  -7 4275.07   95.09
   7  -6  -4 4453.15   94.19
  -7  -6   4 4303.77   95.59
  -7  -6   4 4359.86   94.19
  -7   6  -4 4229.68   95.19
  -6  -4   7 4396.26   93.89
   7   6   4 4364.46   95.89
   0  -5   7 1293.57   29.00
   5   7   0 1235.58   29.00
  -5   7   0 1268.27   29.20
   0   5  -7 1242.58   28.50
   5  -7   0 1296.07   29.10
   5   7   0 1279.67   29.40
   7   0  -5 1295.27   29.60
   7   0   5 1285.07   29.40
   0   5  -7 1262.47   29.00
   7   0   5 1259.27   29.30
   7   0   5 1323.37   29.30
   0  -5  -7 1299.87   29.60
   0  -5  -7 1290.57   29.00
   0  -5   7 1252.67   28.50
  -7   0  -5 1340.97   29.50
  -7   0   5 1310.57   29.60
  -5  -7   0 1227.68   29.30
  -5  -7   0 1273.67   29.10
   5  -7   0 1284.87   29.20
  -5   7   0 1294.07   29.10
   0   5   7 1270.37   29.00
   0   5   7 1329.77   29.60
  -1   5   7   48.10    3.30
  -5  -7  -1   39.70    3.20
  -5   7   1   49.50    3.30
  -7  -1  -5   48.70    3.70
   5  -7   1   50.29    3.00
  -1   5   7   46.90    3.60
  -5   7   1   49.30    3.40
   1   5  -7   44.70    2.30
   7  -1   5   44.70    4.10
   7   1  -5   49.90    3.50
   5   7  -1   43.90    3.30
   1  -5   7   41.30    1.80
  -7   1   5   47.50    3.60
  -5  -7  -1   48.40    3.50
   7  -1   5   44.20    3.40
  -7  -1  -5   49.40    3.70
   1   5  -7   46.20    3.40
   1  -5   7   45.70    3.40
   5  -7   1   54.09    3.50
   5   7  -1   46.30    3.50
  -1  -5  -7   45.70    3.50
  -1  -5  -7   44.70    3.50
   5  -7  -1   49.70    3.30
   7   1   5   52.39    3.70
   7   1   5   48.60    3.70
   1   5   7   43.40    3.60
  -5   7  -1   44.20    3.00
  -7   1  -5   42.60    3.50
  -1  -5   7   46.10    3.20
   1  -5  -7   45.10    3.50
  -5  -7   1   44.80    3.20
   5  -7  -1   44.20    3.20
  -5   7  -1   48.40    3.60
  -1  -5   7   51.19    2.30
   5   7   1   44.30    3.50
  -1   5  -7   42.20    3.50
   1  -5  -7   46.50    3.10
  -5  -7   1   47.80    3.50
  -7  -1   5   41.70    3.50
   5   7   1   46.50    3.50
   1   5   7   44.60    3.40
   7  -1  -5   46.50    3.60
  -7   2   5   73.69    2.40
   7  -2   5   71.29    3.60
  -2   5   7   74.59    4.00
  -2   5   7   71.39    3.30
   5  -7   2   72.09    4.00
   5   7  -2   71.99    3.80
  -5  -7  -2   70.39    3.90
  -5   7   2   72.09    3.70
  -7   2   5   77.19    4.30
   2   5  -7   71.59    3.50
   7   2  -5   67.99    3.80
   5   7  -2   69.29    3.60
  -5   7   2   71.89    3.60
  -2  -5  -7   75.59    3.90
   7  -2   5   66.39    4.00
   5  -7   2   68.49    3.20
  -7  -2  -5   75.69    3.90
  -7  -2  -5   73.99    4.00
   2  -5   7   67.59    2.30
   7   2  -5   71.69    2.30
  -5  -7  -2   74.29    4.20
   2   5  -7   65.99    2.80
   2  -5   7   68.79    2.30
   2  -5   7   62.89    3.70
   2   5   7   65.29    4.10
  -5   7  -2   71.69    4.20
  -5  -7   2   72.49    3.70
  -5   7  -2   72.39    3.30
   2  -5  -7   69.99    3.90
  -7   2  -5   79.29    4.40
   7   2   5   73.69    4.20
  -2   5  -7   67.99    4.00
  -7   2  -5   70.69    3.70
   2  -5  -7   65.49    3.50
  -7  -2   5   68.99    4.20
   2   5   7   71.99    3.70
   7   2   5   74.89    4.00
   5  -7  -2   70.19    3.80
   5   7   2   69.89    4.00
   7  -2  -5   75.09    2.40
  -7  -2   5   68.19    2.20
  -5  -7   2   69.29    3.70
   5  -7  -2   70.69    3.60
   5   7   2   75.79    4.10
   7  -2  -5   75.09    4.00
  -2  -5   7   70.19    2.90
  -2  -5   7   70.39    3.20
   2   5   7   67.29    4.00
  -5  -7  -3   27.10    2.50
   5   7  -3   23.90    2.20
   3   5  -7   26.30    1.90
   5  -7   3   26.50    1.90
  -5   7   3   28.50    2.30
  -3  -5  -7   28.60    2.60
   3  -5   7   27.10    2.60
   3   5  -7   27.50    2.10
   7  -3   5   26.50    2.10
  -7  -3  -5   27.70    2.50
  -5  -7  -3   27.50    2.40
  -5   7   3   30.30    2.40
  -3   5   7   25.70    2.00
   5  -7   3   28.10    2.60
   7  -3   5   33.80    2.70
   7   3  -5   27.10    2.50
   7   3  -5   29.60    2.00
  -7  -3  -5   27.70    2.60
   5   7  -3   30.70    2.40
   3  -5   7   23.90    1.90
  -7   3   5   31.20    2.10
   7  -3  -5   28.00    2.60
  -5  -7   3   29.00    2.30
  -7   3  -5   34.00    2.70
   3   5   7   30.60    2.70
  -7   3  -5   32.10    2.30
   5  -7  -3   30.70    2.40
  -7  -3   5   33.40    2.50
   5   7   3   26.50    2.60
   5   7   3   22.20    2.40
   3  -5  -7   28.40    2.60
  -7  -3   5   26.60    2.00
  -3   5  -7   31.30    2.60
   7  -3  -5   29.80    2.10
  -3  -5   7   28.50    1.90
  -3  -5   7   30.60    2.60
  -3   5  -7   28.40    2.00
   3   5   7   30.30    2.60
  -5   7  -3   25.10    2.50
   7   3   5   28.50    2.60
   3  -5  -7   30.50    2.20
   5  -7  -3   30.30    2.50
   7   3   5   26.30    2.60
  -5  -7   3   34.40    3.10
  -5   7  -3   26.60    1.90
   7   4  -5  699.23   16.80
  -7  -4  -5  711.83   16.80
  -5   7   4  701.83   16.30
   7  -4   5  665.23   16.60
   7  -4   5  680.83   16.30
   4   5  -7  695.93   16.30
   4   5  -7  686.33   16.10
   4  -5   7  673.23   15.80
   5  -7   4  693.43   16.00
  -7   4   5  712.13   15.80
  -5  -7  -4  685.93   16.60
   5  -7   4  661.83   16.60
  -4   5   7  687.23   16.00
   5   7  -4  685.73   16.30
  -5   7   4  687.03   16.80
   5   7  -4  699.83   16.50
  -4  -5  -7  696.83   16.80
   7   4  -5  673.93   15.70
   4  -5   7  703.23   16.80
  -4   5  -7  693.23   15.80
  -4  -5   7  685.43   16.30
   7  -4  -5  698.13   16.90
   4  -5  -7  695.03   16.10
   7  -4  -5  701.33   15.80
  -4  -5   7  692.53   16.00
   5   7   4  694.73   17.00
   7   4   5  699.03   17.00
   4  -5  -7  701.83   16.90
  -5  -7   4  709.83   16.30
  -5   7  -4  675.13   16.00
  -5  -7   4  697.43   16.40
   5  -7  -4  712.13   16.30
  -7  -4   5  698.13   16.80
   4   5   7  699.03   17.00
   5  -7  -4  694.03   16.80
  -7  -4   5  681.43   15.70
  -7   4  -5  691.83   16.40
   7  -5   5    0.00    2.00
  -7  -5  -5    0.00    2.10
   7  -5   5    0.00    1.60
   5  -7   5    2.60    2.20
   5   5  -7    0.00    1.80
  -7   5   5    2.30    1.50
  -5  -7  -5    3.20    2.10
   7   5  -5    0.00    2.10
   5   7  -5    0.00    1.80
  -5  -5  -7    0.00    2.20
   5   5  -7    1.60    1.50
   5  -7   5    0.40    1.30
   5  -5   7    0.00    2.10
  -5   5   7    0.20    1.50
   5   7  -5    1.60    1.80
  -5   7   5    0.70    1.80
   5  -5   7    0.00    1.20
   7   5  -5    2.20    1.50
  -5  -7   5    0.00    1.80
  -7  -5   5    0.00    1.50
  -7   5  -5    0.00    1.70
   5  -7  -5    0.00    1.80
   5  -7  -5    0.00    2.00
  -5   5  -7    1.10    1.40
  -5   7  -5    0.00    1.30
   5   7   5    0.00    2.10
  -5  -5   7    0.00    1.70
   7   5   5    0.00    2.10
   7  -5  -5    0.60    2.00
   7  -5  -5    2.80    1.50
  -7  -5   5    0.00    1.80
  -5  -7   5    1.30    1.60
   5  -5  -7    0.00    2.00
   5   5   7    0.00    2.10
   5  -5  -7    0.00    1.50
  -5  -5   7    0.00    1.50
   5   7  -6  348.17    9.10
   7   6  -5  354.56    9.60
  -7  -6  -5  359.06    9.70
   7  -6   5  332.67    8.80
   6   5  -7  347.37    8.60
   5   7  -6  344.07    9.00
  -5   7   6  340.57    9.00
  -5  -7  -6  339.97    9.50
   5  -7   6  344.27    9.60
   6  -5   7  336.87    9.60
   6   5  -7  332.87    9.20
   7   6  -5  334.97    8.70
   7  -6   5  347.77    9.70
   6  -5   7  340.77    8.70
   5  -7   6  336.27    8.30
  -7   6   5  341.47    8.80
  -6   5   7  353.76    8.60
  -6  -5  -7  342.67    9.70
  -7  -6   5  353.46    8.70
  -6  -5   7  353.86    9.30
   7  -6  -5  351.86    9.70
  -6   5  -7  337.97    8.80
   6  -5  -7  348.07    8.60
   6  -5  -7  333.47    9.70
  -5  -7   6  338.47    9.10
  -5  -7   6  331.17    8.90
  -5   7  -6  335.77    8.40
   5   7   6  328.57    9.80
   5  -7  -6  355.16    9.70
   5  -7  -6  349.27    9.00
  -7   6  -5  347.97    9.00
   7   6   5  349.47   10.00
  -6  -5   7  358.06    8.60
   7  -6  -5  357.56    8.80
  -7  -6   5  337.77    9.40
   6   5   7  351.36    9.80
  -7   0  -6    0.00    1.70
   6  -7   0    0.00    1.80
   7   0   6    0.00    2.20
  -6   7   0    0.00    1.90
   7   0   6    0.60    1.80
   0  -6  -7    4.30    1.90
   0  -6  -7    0.00    1.80
   0  -6   7    2.70    1.80
   0   6  -7    0.00    1.80
   6   7   0    2.10    2.00
   0   6   7    1.00    1.80
   6  -7   0    0.00    1.70
  -6   7   0    0.00    1.70
  -7   0   6    0.20    1.90
  -6  -7   0    2.00    1.80
  -6  -7   0    0.00    1.80
   7   0  -6    1.60    2.00
   6   7   0    0.00    1.70
  -6  -7  -1  435.46   11.20
   7   1  -6  434.16   11.20
  -1  -6  -7  422.66   11.00
   7  -1   6  454.85   11.50
  -7  -1  -6  455.55   11.30
  -7  -1  -6  436.86   11.30
  -1  -6  -7  428.86   11.30
   7  -1   6  438.16   11.00
   6   7  -1  443.46   11.30
  -1   6   7  431.36   10.90
   1  -6   7  428.96   11.00
   1   6  -7  413.96   10.00
   1   6  -7  424.36   10.90
   6  -7   1  427.96   10.80
   6  -7   1  443.56   11.00
   6   7  -1  413.76   10.80
  -6  -7  -1  429.96   11.00
  -6   7   1  438.56   11.10
  -6   7   1  447.76   11.00
  -6   7  -1  424.26   10.80
  -6   7  -1  433.06   11.10
  -6  -7   1  431.36   11.10
  -6  -7   1  425.36   10.80
  -7  -1   6  426.46   11.20
  -1  -6   7  406.96   10.00
   6  -7  -1  441.56   11.00
   1  -6  -7  447.16   11.30
   1  -6  -7  429.06   10.80
   6  -7  -1  436.26   10.90
   1   6   7  432.56   11.10
  -7   1  -6  443.96   11.10
  -1   6  -7  433.16   11.10
   6   7   1  436.76   11.30
   6   7   1  434.56   11.00
   7  -1  -6  432.56   11.30
   7   1   6  428.06   11.10
  -1  -6   7  427.06   10.80
   2   6  -7  805.32   19.00
   7  -2   6  799.62   19.50
  -7  -2  -6  819.72   19.50
  -6  -7  -2  800.12   19.30
  -6   7   2  802.42   19.40
  -7  -2  -6  867.91   19.70
   2  -6   7  806.42   19.30
   2   6  -7  789.92   18.60
   6  -7   2  803.02   19.00
   6  -7   2  799.62   19.30
   6   7  -2  834.82   19.50
   6   7  -2  776.12   19.00
  -6   7   2  843.32   19.10
   7  -2   6  816.62   19.20
  -2   6   7  789.32   19.00
  -2  -6  -7  838.82   19.40
   7   2  -6  838.02   19.60
  -6  -7   2  811.92   19.10
   6   7   2  813.02   19.30
   7   2   6  838.02   19.60
  -7  -2   6  872.01   19.70
   2  -6  -7  832.12   19.70
   2  -6  -7  828.12   19.10
  -2  -6   7  792.22   18.60
  -2  -6   7  831.82   19.00
  -2   6  -7  818.92   19.40
   7  -2  -6  823.32   19.70
   7  -2  -6  808.92   18.10
   6  -7  -2  850.01   19.10
  -7   2  -6  844.82   19.30
  -6   7  -2  807.62   19.10
  -6   7  -2  815.52   19.40
   2   6   7  810.22   19.70
   6   7   2  847.42   19.80
   6  -7  -2  837.72   19.50
  -6  -7   2  801.32   19.40
   2   6   7  830.32   19.40
   7   3  -6  311.97    7.40
  -7   3   6  312.47    7.50
   7  -3   6  313.07    9.00
   7   3  -6  311.57    8.80
   7  -3   6  319.67    8.30
   3  -6   7  299.27    8.60
  -7  -3  -6  309.87    8.90
  -6   7   3  326.27    8.90
  -6   7   3  315.57    8.40
  -3  -6  -7  318.17    8.80
   3   6  -7  311.37    8.00
   3   6  -7  316.97    8.30
  -3   6   7  293.67    8.20
   6   7  -3  300.77    8.20
   6   7  -3  330.87    8.70
  -6  -7  -3  305.97    8.60
   6  -7   3  308.47    8.10
   6  -7   3  314.87    8.80
   3  -6  -7  317.47    8.30
   3  -6  -7  303.37    8.90
  -7  -3   6  311.77    7.40
   7   3   6  308.87    9.00
  -7   3  -6  324.87    8.40
  -7  -3   6  300.87    8.60
  -6  -7   3  315.77    8.50
  -6  -7   3  312.47    8.40
  -6   7  -3  302.07    8.10
   6  -7  -3  327.77    8.30
   6   7   3  317.97    9.10
   7  -3  -6  324.77    9.00
   7  -3  -6  310.67    7.50
  -3  -6   7  310.07    7.90
  -3  -6   7  314.47    8.20
   3   6   7  310.97    9.00
   6  -7  -3  323.87    8.80
  -7  -4  -6 4390.46   94.59
  -6   7   4 4351.46   94.09
  -4  -6  -7 4155.18   94.49
   7   4  -6 4339.77   93.49
   6  -7   4 4393.86   94.79
  -4   6   7 4222.18   93.89
   4  -6   7 4362.66   94.59
   7  -4   6 4254.57   94.89
   7   4  -6 4330.77   95.39
   4  -6   7 4180.38   94.39
   6   7  -4 4188.98   95.19
   4   6  -7 4127.59   94.79
   4   6  -7 4310.77   93.99
  -6  -7  -4 4117.59   94.39
  -7   4   6 4342.87   93.59
   6   7  -4 4198.48   93.99
   7  -4   6 4206.58   94.49
   6  -7   4 4369.86   94.49
  -7  -4   6 4355.06   93.49
   6  -7  -4 4348.06   94.09
   6  -7  -4 4266.67   95.49
  -7  -4   6 4108.69   95.29
   7  -4  -6 4182.38   93.59
  -7   4  -6 4353.56   94.99
   4   6   7 4294.97   95.59
  -6  -7   4 4344.77   95.19
  -6  -7   4 4364.26   93.99
  -6   7  -4 4387.16   94.79
  -4  -6   7 4348.17   93.89
   4  -6  -7 4331.97   93.99
  -4  -6   7 4085.69   94.79
   7   4   6 4308.57   95.59
   6   7   4 4442.36   95.69
   7  -4  -6 4312.37   95.59
   4  -6  -7 4334.37   95.59
  -4   6  -7 4311.07   94.39
   7   5  -6  344.07    9.40
  -7   5   6  348.57    8.60
  -5   6   7  337.17    8.80
   7  -5   6  325.17    9.40
  -7  -5  -6  342.07    9.60
   5  -6   7  324.67    8.30
   5  -6   7  348.97    9.70
   5   6  -7  337.67    9.00
   5   6  -7  346.07    8.80
  -6  -7  -5  353.46    9.60
   7   5  -6  352.86    8.50
   7  -5   6  340.07    8.80
   6  -7   5  344.17    8.60
   6  -7   5  351.66    9.60
   6   7  -5  337.47    9.30
   6   7  -5  344.47    8.90
  -6   7   5  342.87    9.00
  -5  -6  -7  345.17    9.60
   6   7   5  329.67    9.70
   6  -7  -5  340.77    9.00
  -5  -6   7  326.57    8.90
  -5  -6   7  358.36    8.70
   6  -7  -5  333.37    9.60
   7  -5  -6  353.26    9.80
   5  -6  -7  332.57    9.60
   5  -6  -7  357.56    8.90
  -7  -5   6  339.27    9.40
  -7  -5   6  346.67    8.50
  -7   5  -6  346.37    9.00
  -5   6  -7  340.17    8.40
   5   6   7  341.57    9.80
  -6  -7   5  326.47    9.20
  -6  -7   5  358.36    8.90
  -6   7  -5  335.07    8.60
   7  -5  -6  343.07    8.50
   7   5   6  348.97    9.80
  -7  -6  -6    0.50    2.30
   6  -6   7    0.00    2.20
   6   6  -7    0.00    2.00
   7  -6   6    0.50    1.60
  -7   6   6    0.00    1.70
  -6  -7  -6    0.00    2.20
   7   6  -6    0.00    1.50
   6  -7   6    2.60    2.30
  -6  -6  -7    0.00    2.20
   6  -6   7    0.00    1.40
   6   7  -6    0.00    2.00
   7  -6   6    1.80    2.20
  -6   6   7    0.00    1.60
   6   6  -7    0.00    1.60
  -6   7   6    0.00    1.70
   6   7  -6    0.00    1.70
   7   6  -6    2.60    2.20
   6  -7   6    2.00    1.40
   6  -7  -6    0.00    1.80
   6  -6  -7    2.10    2.20
   6  -6  -7    0.50    1.60
  -6  -7   6    2.20    1.80
  -7  -6   6    0.00    1.80
  -7  -6   6    0.20    1.60
  -6   7  -6    0.00    1.40
   6   6   7    2.00    2.30
  -6  -6   7    1.10    1.70
   6  -7  -6    0.00    2.10
   6   7   6    1.40    2.20
   7  -6  -6    0.00    2.10
   7  -6  -6    0.00    1.60
  -7   6  -6    0.00    1.60
  -6   6  -7    0.00    1.50
  -6  -6   7    0.00    1.80
  -6  -7   6    0.00    1.70
   7   6   6    0.00    2.30
  -7  -7   0 3616.94   79.69
  -7   0  -7 3742.63   80.69
  -7   7   0 3681.03   80.59
  -7   7   0 3664.53   79.79
   0  -7  -7 3602.44   80.89
   0  -7  -7 3550.54   79.79
   0  -7   7 3527.05   79.79
   0   7  -7 3561.74   79.79
   0   7   7 3545.15   79.79
   7  -7   0 3592.74   80.59
   7  -7   0 3586.44   79.79
   7   0  -7 3692.73   80.89
   7   0   7 3668.43   80.69
   7   0   7 3730.23   80.19
   7   7   0 3630.34   80.89
   7   7   0 3514.65   79.69
  -7  -7  -1    0.00    1.90
  -1  -7  -7    0.20    1.90
   7   7  -1    2.00    2.10
  -7  -1  -7    0.00    1.80
  -7  -1  -7    0.90    2.20
   7  -1   7    0.00    1.70
   7  -1   7    0.00    2.20
   7   1  -7    0.00    2.00
   7  -7   1    0.00    1.90
  -7   7   1    1.40    1.90
  -7   7   1    1.50    1.90
  -1  -7  -7    0.00    1.90
   7  -7   1    0.00    1.70
   1   7  -7    0.00    1.10
   1   7  -7    0.00    1.90
  -1   7   7    0.00    1.70
   1  -7   7    0.00    1.90
   7   7  -1    0.00    1.70
   1  -7  -7    0.00    1.90
  -1  -7   7    0.00    0.90
  -1  -7   7    0.90    1.80
   7  -7  -1    0.00    1.80
   7  -7  -1    0.00    1.80
   1  -7  -7    0.00    1.80
  -7   7  -1    0.00    1.90
   7  -1  -7    0.00    2.10
  -7  -1   7    1.40    1.90
  -7   1  -7    0.60    1.70
  -7   7  -1    0.50    1.80
   7   1   7    0.00    1.90
  -7  -7   1    2.00    1.80
  -7  -7   1    0.00    1.80
   7   7   1    0.00    2.10
   7   7   1    0.00    1.80
  -7  -7  -2   21.20    2.40
   7   7  -2   16.40    2.00
   7  -7   2   19.10    2.10
  -7  -2  -7   14.10    2.50
   7  -2   7   16.10    2.60
   7   2  -7   12.00    2.30
   7  -7   2   17.70    2.40
  -7   7   2   20.00    2.30
  -7   7   2   17.40    2.20
  -2  -7  -7   21.20    2.50
   2   7  -7   17.20    1.50
   2   7  -7   18.10    2.20
  -2   7   7   16.70    2.10
   7  -2   7   20.10    2.10
   7   7  -2   21.40    2.50
   2  -7   7   16.70    2.40
  -7  -7   2   18.50    2.20
  -2  -7   7   20.20    2.20
   2   7   7   21.00    2.50
   7  -7  -2   17.80    2.30
   2  -7  -7   17.80    2.30
  -2  -7   7   13.30    1.40
  -7   7  -2   15.50    2.10
   7  -2  -7   21.10    2.50
   2  -7  -7   10.90    2.30
  -7  -2   7   16.90    2.30
  -7   2  -7   17.30    2.00
   7   2   7   19.50    2.40
   7  -7  -2   21.90    2.20
  -7  -7   2   20.40    2.30
   7   7   2   17.80    2.60
  -7  -7  -3    1.90    2.00
   7   3  -7    1.40    1.10
   7  -7   3    0.00    2.10
  -7  -3  -7    0.00    2.20
   7   7  -3    0.00    1.70
   7  -3   7    1.10    1.60
   7  -3   7    0.00    2.20
  -7   3   7    0.00    1.10
   3  -7   7    0.00    2.10
  -7   7   3    0.30    1.80
  -3  -7  -7    3.00    2.10
   7  -7   3    0.00    1.60
   7   3  -7    0.00    2.00
  -3   7   7    0.00    1.70
   3   7  -7    4.70    1.90
   7   7  -3    2.50    2.10
   3   7  -7    0.00    1.50
  -7   7  -3    0.00    1.80
   3  -7  -7    0.00    2.00
   3   7   7    0.00    2.00
   7  -7  -3    2.10    2.00
   7  -7  -3    2.10    1.80
  -3  -7   7    0.00    1.30
  -7  -7   3    0.00    1.80
   7  -3  -7    0.70    2.00
   7  -3  -7    0.20    1.10
  -7  -3   7    4.10    1.10
  -7   3  -7    0.00    1.60
  -3  -7   7    1.90    1.80
  -7  -7   3    0.40    1.80
   7   3   7    0.90    2.10
   3  -7  -7    0.00    1.80
  -7  -3   7    0.00    1.90
   7   7   3    0.00    2.20
  -7  -7  -4  455.85   12.00
   7  -4   7  487.05   12.40
   7   4  -7  467.95   12.00
  -7  -4  -7  468.35   12.20
   7  -7   4  467.15   12.10
   7   7  -4  463.55   12.00
   7   7  -4  446.36   11.40
  -7   4   7  452.75   10.90
   7  -7   4  452.55   11.40
  -7   7   4  469.85   11.50
  -4  -7  -7  452.15   12.00
   4   7  -7  439.96   11.40
   7  -4   7  469.15   11.50
   4  -7   7  451.05   10.60
  -4   7   7  449.95   11.50
   7   4  -7  467.55   10.90
   4   7  -7  460.85   11.50
   4  -7   7  435.56   12.00
  -4   7  -7  449.66   10.70
  -4  -7   7  445.26   11.30
   4  -7  -7  465.75   11.60
   4   7   7  479.05   12.40
   7  -7  -4  484.45   12.30
   7  -7  -4  482.25   11.50
  -7   7  -4  448.56   11.40
  -7  -4   7  461.35   12.00
   7  -4  -7  486.05   12.40
   7  -4  -7  453.35   10.90
  -4  -7   7  463.45   11.40
  -7  -7   4  467.85   11.90
  -7  -7   4  465.95   11.50
   4  -7  -7  479.85   12.30
   7   4   7  473.25   12.40
  -7  -4   7  467.55   10.80
  -7   4  -7  481.35   11.60
   7   7   4  481.55   12.60
  -7  -7  -5    0.00    2.20
   7  -5   7    1.80    2.20
   7   5  -7    0.30    2.10
  -7  -5  -7    0.00    2.30
   7  -7   5    2.30    2.30
   7   7  -5    0.00    2.10
   7   7  -5    0.00    1.70
  -7   5   7    0.00    1.50
   7  -7   5    0.40    1.60
  -7   7   5    0.20    1.70
  -5  -7  -7    0.50    2.30
   5   7  -7    0.00    1.80
   7  -5   7    0.00    1.50
   5  -7   7    1.20    1.20
  -5   7   7    0.60    1.70
   7   5  -7    0.00    1.40
   5   7  -7    0.10    1.80
   5  -7   7    0.00    2.20
  -5   7  -7    0.00    1.30
  -5  -7   7    0.00    1.60
   5  -7  -7    1.10    1.80
   5   7   7    2.10    2.20
   7  -7  -5    0.00    2.10
   7  -7  -5    0.00    1.80
  -7   7  -5    0.00    1.70
  -7  -5   7    0.90    1.90
   7  -5  -7    0.00    2.20
   7  -5  -7    0.00    1.50
  -5  -7   7    0.00    1.80
  -7  -7   5    1.60    1.90
  -7  -7   5    0.70    1.80
   5  -7  -7    3.10    2.20
   7   5   7    0.00    2.20
  -7  -5   7    1.30    1.50
  -7   5  -7    0.00    1.70
   7   7   5    2.00    2.30
  -7  -7  -6  245.58    7.70
   7  -7   6  245.08    7.90
   7   7  -6  240.38    7.40
  -7  -6  -7  252.77    7.90
   7  -6   7  230.98    6.60
   7  -6   7  272.17    8.00
  -7   6   7  245.68    6.80
   7   6  -7  241.68    6.70
  -7   7   6  257.97    7.00
  -6  -7  -7  249.48    7.80
   7   7  -6  239.78    6.90
   7   6  -7  244.68    7.40
   6   7  -7  242.68    6.90
  -6   7   7  237.58    6.80
   6   7  -7  233.28    7.10
   6  -7   7  264.87    7.90
   6  -7  -7  247.58    6.90
   6  -7  -7  227.48    7.70
  -6   7  -7  240.68    6.60
   6   7   7  245.08    8.00
   7  -7  -6  248.58    7.80
   7  -7  -6  248.88    7.00
  -7  -7   6  242.78    7.40
   7  -6  -7  247.18    7.80
   7  -6  -7  246.68    6.70
  -7  -6   7  253.17    7.50
  -7   6  -7  247.88    6.90
  -6  -7   7  252.27    6.90
  -7   7  -6  254.97    6.90
   7   6   7  250.17    8.00
  -7  -7   6  259.97    7.00
  -6  -7   7  232.98    7.20
   7   7   6  248.88    8.00
  -7  -7  -7    0.00    2.20
   7   7  -7    0.30    2.10
   7   7  -7    0.00    1.60
   7  -7   7    1.40    1.50
  -7   7   7    0.00    1.60
   7  -7   7    0.00    2.20
   7  -7  -7    0.00    1.70
  -7   7  -7    0.00    1.50
   7  -7  -7    1.20    2.10
  -7  -7   7    0.00    1.80
  -7  -7   7    0.00    1.70
   7   7   7    0.00    2.10
  -8   0   0  304.17    8.30
   0  -8   0  298.77    8.20
   0   0  -8  306.57    7.90
   0   0   8  302.67    7.90
   0   0   8  309.77    7.90
   0   0   8  306.97    7.90
   0   8   0  295.07    7.80
   0   8   0  288.27    7.70
   0   8   0  279.37    8.00
   8   0   0  305.77    8.30
   8   0   0  324.97    7.80
  -8  -1   0    0.00    1.60
  -8  -1   0    0.00    1.50
  -8   1   0    0.00    1.60
  -8   1   0    0.00    1.60
  -1   0  -8    0.00    1.40
  -1   0   8    0.00    1.40
  -1   0   8    0.00    1.50
  -1   0   8    0.00    1.40
   0  -8  -1    0.00    1.70
   0  -8   1    0.00    1.70
   0   8  -1    0.00    1.30
   0   8  -1    0.00    1.30
   0   8  -1    1.60    1.70
   0   8   1    0.00    1.50
   0   8   1    0.60    1.70
   1   0  -8    0.00    1.50
   1   0   8    0.00    1.30
   1   0   8    0.80    1.70
   1   0   8    1.30    1.50
   8  -1   0    0.50    1.80
   8  -1   0    0.00    1.50
   8   1   0    0.00    1.80
   8   1   0    0.00    1.40
   2   0  -8 2083.49   46.70
   2   0   8 2099.39   46.60
   2   0   8 2061.89   46.60
   2   0   8 2080.79   46.40
   2   0   8 2077.89   46.30
   8  -2   0 2113.79   46.90
   8  -2   0 2093.79   46.00
   8   2   0 2096.89   47.00
   8   2   0 2124.39   46.00
   0   8  -2 2092.79   46.40
   0   8   2 2010.40   46.70
   0   8   2 1963.40   46.30
   0   8  -2 2027.60   46.30
  -8  -2   0 2079.59   47.00
  -8  -2   0 2117.39   46.00
  -8   2   0 2123.49   47.00
  -8   2   0 2094.29   46.10
  -2   0   8 2063.89   46.60
  -2   0   8 2072.89   45.90
  -2   0   8 2097.59   45.90
   0  -8  -2 2072.09   46.70
   0  -8  -2 2128.39   46.40
   0  -8   2 2105.89   46.40
   0   8  -2 2041.00   46.30
  -3   0   8    0.00    1.50
   8   3   0    0.00    1.50
   0   8  -3    0.00    1.10
   0   8  -3    0.00    1.70
   0   8   3    0.00    1.60
   0   8   3    0.00    1.70
   3   0  -8    2.00    1.70
   3   0   8    0.00    1.40
   3   0   8    0.00    2.00
   3   0   8    0.00    1.80
   8  -3   0    0.20    1.80
   8  -3   0    0.00    1.60
   8   3   0    0.00    1.80
  -8   3   0    0.00    1.70
  -8   3   0    0.00    1.60
  -3   0  -8    2.80    1.50
   0   8  -3    0.00    1.20
  -3   0   8    0.40    1.40
  -3   0   8    0.00    1.30
   0  -8  -3    0.00    1.60
   0  -8  -3    0.00    1.70
   0  -8   3    0.50    1.80
  -8  -3   0    0.30    1.70
  -8  -3   0    0.00    1.60
  -4   0   8    4.60    1.30
   0  -8  -4    3.60    1.80
   0   8  -4    6.00    1.90
   0   8   4    2.70    1.90
   4   0  -8    6.20    1.90
   4   0   8    5.40    1.60
   4   0   8    7.40    2.20
   4   0   8    6.50    2.00
   8  -4   0    5.80    2.00
   8  -4   0    4.80    1.70
   8   4   0    7.30    2.10
   0  -8  -4    3.50    1.90
   0  -8   4    5.80    1.90
   0   8  -4    4.90    1.10
   0   8   4    4.90    1.80
   8   4   0    3.90    1.60
  -8   4   0    7.40    2.00
  -8   4   0    5.80    1.80
  -4   0  -8    6.90    1.70
  -4   0   8    6.50    1.70
  -4   0   8    8.20    1.40
  -8  -4   0    3.60    1.70
  -8  -4   0    4.40    1.90
  -8  -5   0    0.00    1.80
   0  -8   5    0.00    0.80
  -8   5   0    0.00    1.80
  -5   0  -8    0.00    1.60
  -5   0   8    0.00    1.80
  -5   0   8    1.60    1.20
  -5   0   8    0.00    1.10
   0  -8  -5    0.00    1.80
  -8   5   0    0.10    1.80
   0   8  -5    0.00    1.00
   0   8  -5    0.00    1.90
   0   8   5    0.00    1.80
   8   5   0    0.90    2.10
   8   5   0    0.00    1.70
   0  -8   5    0.00    1.90
   8  -5   0    0.00    1.90
   8  -5   0    0.00    1.80
   0  -8  -5    2.70    2.00
   5   0  -8    2.40    1.90
   5   0   8    0.00    1.60
   5   0   8    0.00    2.20
   0  -8  -6  614.74   15.10
   8   6   0  636.74   15.50
   8  -6   0  619.34   15.10
  -8  -6   0  601.84   14.80
  -8   6   0  623.74   15.20
  -8   6   0  623.84   14.90
  -6   0  -8  643.64   15.20
   8   6   0  611.54   14.80
   0  -8  -6  638.04   15.40
   0  -8   6  608.54   15.00
   8  -6   0  616.34   14.90
   6   0  -8  603.34   15.20
   6   0   8  620.44   15.10
   6   0   8  607.44   15.40
   8   7   0    0.20    2.20
   0  -8  -7    2.50    2.00
   8   7   0    0.00    1.80
   0  -8   7    0.00    1.90
  -7   0  -8    0.00    1.80
   7   0   8    0.00    2.30
   8  -7   0    0.00    1.90
   8  -7   0    0.00    1.90
   0  -8  -7    0.20    2.00
   7   0   8    0.80    1.80
  -8   7   0    1.30    2.00
  -8  -7   0    0.40    1.90
  -8   7   0    1.70    2.00
   7   0  -8    0.00    2.00
   1   8   0    3.20    1.70
  -8   0  -1    0.00    1.60
   0  -1  -8    0.00    1.50
  -1   8   0    0.20    1.40
  -1  -8   0    0.00    1.70
   0  -1   8    0.00    1.60
  -1   8   0    1.10    1.70
   1  -8   0    1.90    1.70
   1   8   0    0.00    1.40
   1  -8   0    0.00    1.30
   0  -1   8    0.00    1.30
  -8   0   1    0.30    1.60
   0   1   8    0.00    1.40
   0   1   8    3.20    1.50
   0  -1  -8    0.00    1.60
   0   1  -8    0.00    1.40
   8   0  -1    0.00    1.70
   8   0  -1    0.30    1.40
   8   0  -1    0.90    1.30
   8   0   1    0.30    1.80
   8   0   1    0.00    1.70
   8   0   1    0.00    1.50
  -1  -1  -8  102.59    4.10
  -1   8   1   93.89    4.20
   8   1  -1  100.99    3.60
  -8  -1  -1  102.59    3.80
  -1   8   1   97.89    3.90
  -8  -1  -1   96.69    4.40
  -1   1   8   95.69    3.80
  -1   1   8   97.49    3.70
  -1  -8  -1   95.69    4.20
   1   8  -1   92.59    3.80
   1   1  -8   92.49    3.60
  -1  -1  -8  102.59    4.20
  -8   1   1   96.99    3.70
  -8   1   1   98.69    4.40
   1  -1   8  111.79    4.30
   8  -1   1  102.39    4.30
   8  -1   1  101.19    3.90
   1   8  -1   98.49    4.40
   1  -8   1   95.69    4.20
   1  -1   8  106.49    3.70
   8   1  -1  102.09    4.40
   1  -8   1  101.59    3.60
   1   8   1   98.59    4.10
   1  -1  -8  101.29    4.10
   8   1   1  100.09    4.40
   1   8   1   98.49    4.10
   8  -1  -1  104.59    3.60
   1  -8  -1  102.69    3.90
   1  -8  -1   94.49    4.40
   1   8   1  106.19    4.50
   8  -1  -1  100.09    4.40
  -8   1  -1   98.49    4.20
   1   1   8   99.99    4.00
  -1  -1   8   96.59    3.60
  -1  -1   8  100.09    3.90
  -1   1  -8  101.19    3.80
   1  -1  -8  101.39    3.80
  -8  -1   1  101.79    4.40
  -1   8  -1   98.29    3.60
  -1   8  -1   93.69    4.30
   1   1   8   98.09    4.00
   8   1   1   97.39    4.00
  -1  -8   1   99.99    4.30
  -8   1  -1   94.19    4.40
  -1  -8   1   97.29    3.80
  -8  -1   1  105.79    3.60
   1  -8   2   60.39    3.60
  -1  -8  -2   56.99    3.40
   8   2  -1   58.39    3.80
   2  -1   8   48.40    3.70
   2  -1   8   58.29    3.00
  -2   1   8   63.49    3.40
  -2   1   8   50.99    3.00
  -8  -2  -1   56.39    3.80
   2   1  -8   59.79    3.30
   8  -2   1   55.19    3.50
  -1   8   2   56.09    3.50
   1   8  -2   56.79    3.40
   8   2  -1   53.79    3.00
  -8   2   1   54.29    3.10
  -8   2   1   53.59    3.70
  -8  -2  -1   64.79    3.40
  -1   8   2   52.19    3.40
   2  -1   8   53.79    3.20
   8  -2   1   52.19    3.40
   1   8  -2   50.19    3.00
  -2  -1  -8   54.59    3.70
  -1  -8   2   55.99    3.60
   1  -8  -2   59.79    3.70
  -8   2  -1   53.99    3.90
  -2  -1   8   47.70    3.00
   8   2   1   58.29    3.30
   1   8   2   54.69    3.40
  -8  -2   1   55.89    2.90
   2   1   8   56.29    3.40
  -2  -1   8   56.49    3.20
  -1  -8   2   55.69    2.90
   8  -2  -1   58.19    3.00
   1   8   2   54.09    3.80
   8  -2  -1   57.69    3.90
  -8   2  -1   57.69    3.40
   8   2   1   59.19    3.80
  -1   8  -2   61.89    3.90
   2  -1  -8   57.69    3.00
   2   1   8   58.49    3.50
   1  -8  -2   53.29    3.40
   1   8   2   56.29    3.40
   2  -1  -8   57.69    3.30
  -8  -2   1   62.39    3.80
  -1   8  -2   55.09    2.70
   2   1   8   55.59    3.50
  -1   8   3 1417.46   32.10
   8   3  -1 1439.56   32.60
   1   8  -3 1344.47   32.00
  -1  -8  -3 1428.16   32.20
   3  -1   8 1433.66   32.20
  -3  -1  -8 1430.46   32.20
  -3   1   8 1449.55   32.40
   8  -3   1 1442.76   32.00
  -8  -3  -1 1444.36   32.70
   3  -1   8 1375.06   32.10
   3   1  -8 1437.46   32.30
  -8   3   1 1510.25   32.70
  -1   8   3 1400.26   32.40
  -8  -3  -1 1412.16   31.90
   8   3  -1 1445.86   31.70
   8  -3   1 1387.76   32.40
  -8   3   1 1451.85   31.80
  -3   1   8 1437.66   31.50
   1  -8   3 1436.16   32.20
   3  -1   8 1389.56   32.10
   1   8  -3 1359.76   31.80
   3  -1  -8 1390.26   31.50
   1   8   3 1343.97   32.10
   1  -8  -3 1448.16   32.50
  -8   3  -1 1481.25   32.60
   8   3   1 1429.76   31.90
  -3   1  -8 1396.16   32.10
   1  -8  -3 1417.76   32.10
  -1  -8   3 1426.56   32.10
  -3  -1   8 1407.06   32.20
   8  -3  -1 1421.66   31.70
  -1   8  -3 1389.36   31.70
  -1   8  -3 1406.26   31.70
  -1   8  -3 1415.96   32.20
   8  -3  -1 1434.56   32.60
   3  -1  -8 1413.96   32.40
  -8  -3   1 1445.76   31.70
  -1  -8   3 1354.56   31.80
  -8   3  -1 1425.56   32.00
   3   1   8 1443.46   32.40
  -8  -3   1 1398.16   32.60
  -3  -1   8 1416.16   31.50
   8   3   1 1458.25   32.70
   1   8   3 1476.15   32.60
   1   8   3 1397.16   32.40
   3   1   8 1419.96   32.20
  -1   8   4   14.70    2.10
  -8  -4  -1   18.80    2.20
  -1   8   4   17.00    2.10
  -4  -1  -8   14.10    2.30
   1  -8   4   19.00    2.20
  -4  -1  -8   19.10    2.00
  -1  -8  -4   17.20    2.20
   8  -4   1   15.30    2.10
  -8   4   1   19.20    2.20
  -8   4   1   20.70    2.00
   4   1  -8   17.60    2.10
  -8  -4  -1   13.80    2.00
  -4   1   8   16.00    2.10
   4  -1   8   17.10    1.80
   4  -1   8   15.30    2.40
   1   8  -4   14.80    2.10
   4  -1   8   14.50    2.20
   8  -4   1   19.70    2.20
   8   4  -1   18.40    2.30
   8   4  -1   15.20    1.80
   1   8  -4   15.70    1.50
  -4   1   8   16.30    1.50
   1   8   4   13.60    2.10
  -1  -8   4   16.60    2.20
   4   1   8   15.70    2.20
  -1   8  -4   20.10    1.70
   8  -4  -1   14.50    2.20
  -8   4  -1   14.80    2.10
  -1   8  -4   14.70    1.20
   4  -1  -8   20.10    2.20
   4  -1  -8   17.80    1.50
   1   8   4   19.40    2.10
   8   4   1   14.90    2.00
   8   4   1   19.00    2.40
  -4  -1   8   18.50    1.50
  -4   1  -8   17.90    1.90
   1  -8  -4   17.10    2.10
  -4  -1   8   15.90    1.90
  -1  -8   4   15.00    1.30
   1  -8  -4   14.80    2.20
   1   8   4   14.30    2.20
  -8  -4   1   17.20    1.90
  -8  -4   1   15.70    2.20
  -1   8  -4   16.70    2.20
  -8   4  -1   18.30    2.20
   8  -4  -1   18.60    2.00
   4   1   8   16.00    2.00
  -1   8   5  437.36   11.00
   5  -1   8  412.66   11.20
   8  -5   1  442.86   11.00
  -5   1   8  432.16    9.90
  -5   1   8  429.66   11.10
  -5  -1  -8  423.16   11.20
  -5  -1  -8  445.66   11.10
   1   8  -5  417.56   11.00
   5  -1   8  446.46   10.90
   8   5  -1  432.86   11.30
   8   5  -1  432.46   10.60
  -8  -5  -1  410.26   10.80
   8  -5   1  443.66   10.90
  -8   5   1  430.46   10.70
   1  -8   5  425.56   11.10
  -1  -8  -5  419.66   11.00
   5   1  -8  434.16   11.10
  -8   5   1  446.66   11.30
   1   8  -5  411.06   10.10
  -8   5  -1  432.76   10.90
  -5   1  -8  432.86   10.80
  -5  -1   8  443.76   11.10
  -8   5  -1  449.26   11.20
  -5  -1   8  402.06    9.90
  -1  -8   5  410.66   10.00
   1  -8  -5  436.36   11.00
   8  -5  -1  442.86   10.70
  -8  -5   1  426.56   11.20
   8   5   1  437.36   11.40
   8   5   1  429.76   10.80
  -1  -8   5  430.26   11.00
   1   8   5  436.76   11.40
   5   1   8  440.76   11.10
   1  -8  -5  440.56   11.40
  -5  -1   8  422.16    9.90
  -8  -5   1  430.36   10.70
   5  -1  -8  413.76    9.90
   8  -5  -1  430.56   11.10
   5  -1  -8  420.46   11.10
  -8   6   1   80.19    4.50
   6  -1   8   85.29    4.00
   8   6  -1   83.69    4.10
   8   6  -1   80.49    4.50
  -6  -1  -8   82.59    4.40
   8  -6   1   89.99    4.20
   8  -6   1   88.49    4.10
   1  -8   6   86.59    4.40
  -8   6   1   80.09    3.90
  -1   8   6   81.89    4.20
  -1  -8  -6   80.99    4.40
  -8  -6  -1   75.99    4.20
  -6  -1  -8   80.39    4.20
   6   1  -8   85.49    4.10
   1   8  -6   77.89    2.80
   1   8  -6   80.99    4.30
   6  -1   8   79.79    4.90
  -6   1   8   84.09    2.60
   1  -8  -6   88.49    4.50
   8   6   1   93.29    4.90
   8  -6  -1   86.89    4.00
  -1  -8   6   80.19    2.80
   1  -8  -6   78.49    4.20
  -8   6  -1   90.19    4.30
  -8  -6   1   89.39    4.00
   8   6   1   78.49    4.10
  -8   6  -1   83.79    4.30
  -6  -1   8   84.29    4.50
  -1  -8   6   81.69    4.10
   6  -1  -8   85.39    2.70
   6   1   8   88.49    4.40
   8  -6  -1   86.49    4.10
   6  -1  -8   80.59    4.60
  -6   1  -8   89.59    4.00
   7  -1   8  121.59    4.70
   8  -7   1  116.59    4.70
  -8  -7  -1  105.79    4.70
  -7  -1  -8  116.09    5.10
   7  -1   8  116.99    5.50
   1   8  -7  113.69    3.40
   8   7  -1  109.39    4.50
   8  -7   1  117.59    4.90
  -8   7   1  119.49    4.70
  -1  -8  -7  118.39    5.00
   1  -8   7  117.79    4.90
   7   1  -8  118.39    5.10
   8   7  -1  115.29    5.10
  -1  -8   7  112.99    4.60
  -8  -7   1  115.49    4.50
   8   7   1  113.39    5.20
   7   1   8  116.59    5.00
   1  -8  -7  117.69    4.80
  -1  -8   7  105.19    3.30
   1  -8  -7  113.89    5.10
   7  -1  -8  115.29    5.00
   8  -7  -1  117.89    4.60
  -7   1  -8  128.59    5.10
  -8   7  -1  124.39    4.80
   8  -7  -1  115.39    5.00
   0   2  -8 2098.39   46.20
   8   0  -2 2079.69   46.90
  -8   0   2 2130.69   46.90
  -2  -8   0 1998.70   46.40
  -2  -8   0 2096.19   46.20
  -2   8   0 1962.20   46.30
  -2   8   0 2020.90   46.20
   8   0  -2 2076.19   45.60
   8   0  -2 2086.99   45.60
   8   0   2 2086.29   46.80
   8   0   2 2119.19   46.20
   8   0   2 2094.99   46.10
   2   8   0 2007.70   46.40
   2  -8   0 2110.99   46.40
   2  -8   0 2032.40   46.20
   0  -2   8 2104.59   46.00
  -8   0  -2 2055.29   46.80
   0  -2  -8 2105.09   46.00
   2   8   0 2072.49   46.20
   0   2  -8 2006.50   46.00
   0   2   8 2051.19   46.60
   0   2   8 2137.89   46.00
   0  -2   8 2087.29   46.20
   0  -2  -8 2131.99   46.70
   1   2  -8   55.79    2.90
  -1   2   8   60.69    3.40
   1  -2   8   60.19    3.40
  -8  -1  -2   62.59    3.80
  -8  -1  -2   51.79    3.50
  -1   2   8   56.99    3.10
  -2   8   1   55.69    3.50
  -1  -2  -8   53.69    3.40
  -1  -2  -8   57.29    3.40
  -8   1   2   66.99    4.10
   8  -1   2   46.10    3.40
   8   1  -2   62.49    4.10
   2  -8   1   61.49    3.50
   1  -2   8   56.09    2.90
   2   8  -1   54.19    3.10
  -2  -8  -1   55.69    3.80
   1   2  -8   57.49    3.30
  -2   8   1   57.29    3.40
   8  -1   2   62.19    3.80
  -8   1   2   59.69    2.90
  -2  -8  -1   51.89    3.50
   2  -8   1   53.59    2.80
   2   8  -1   55.79    3.40
   8   1  -2   55.79    2.70
   8  -1  -2   51.89    3.70
   2   8   1   56.79    3.80
  -8  -1   2   57.59    3.80
   2  -8  -1   55.29    3.30
  -2  -8   1   54.59    3.30
  -2  -8   1   53.19    3.60
  -2   8  -1   56.79    3.00
   2  -8  -1   60.29    3.70
   1  -2  -8   53.59    3.60
   2   8   1   56.09    3.60
   1   2   8   51.69    3.60
   1   2   8   55.19    3.40
  -2   8  -1   60.69    3.60
   1  -2  -8   61.99    3.20
  -1  -2   8   58.09    3.00
  -1  -2   8   57.89    3.10
  -1   2  -8   59.19    3.00
  -1   2  -8   53.79    3.50
   8   1   2   56.09    3.70
  -8  -1   2   59.29    2.70
  -8   1  -2   57.39    3.60
   8  -1  -2   52.49    2.70
   8   1   2   55.59    3.40
   8   2  -2  994.40   22.20
   2   8  -2  946.21   22.50
  -2   8   2  955.60   22.70
   2  -8   2  937.61   22.80
   8   2  -2  999.10   23.20
  -8  -2  -2 1040.90   23.30
  -8   2   2 1041.80   23.30
   2  -2   8  998.30   22.50
  -2  -8  -2  948.41   22.80
  -2   2   8 1001.40   22.30
   2  -2   8  981.30   22.50
   2  -8   2  987.00   22.40
  -8   2   2 1009.10   22.20
  -2   8   2  997.70   22.90
   8  -2   2  988.40   22.70
  -2   2   8  979.20   23.00
  -2  -8  -2  947.11   22.90
   2   8  -2  922.71   22.70
   2  -2   8  975.10   22.80
   2   2  -8  986.30   22.60
   2   2  -8  947.41   22.30
   8  -2   2  978.40   23.00
  -8  -2  -2  998.20   22.70
  -2  -2  -8  982.80   22.80
  -2  -2   8  962.50   22.30
  -8   2  -2 1021.10   23.10
  -2  -8   2 1000.10   22.80
   8   2   2 1001.60   23.20
   2  -2  -8  991.50   22.40
   2   8   2 1005.90   23.10
   2   8   2  987.50   22.80
   2  -8  -2 1007.60   22.90
   2  -8  -2 1018.60   22.80
  -8   2  -2  994.50   22.70
  -8  -2   2  989.30   22.20
   2   2   8  997.90   23.00
   8  -2  -2  990.20   22.20
   8   2   2 1011.80   22.70
  -8  -2   2  982.50   23.20
   8  -2  -2 1029.20   23.20
  -2  -8   2  967.80   22.50
   2   2   8  988.30   22.90
  -2   2  -8  988.70   22.80
   2  -2  -8 1013.50   23.10
  -2  -2   8  983.50   22.60
  -2   8  -2  955.70   22.30
  -2   8  -2  981.30   22.80
   2   2   8 1011.70   22.80
   3  -2   8  511.05   13.30
   8   3  -2  541.45   12.60
  -2  -8  -3  516.15   13.20
  -3   2   8  556.04   12.60
   2  -8   3  527.55   12.50
  -2  -8  -3  521.75   13.30
  -2   8   3  548.25   13.40
   2   8  -3  541.45   13.20
   3  -2   8  526.55   12.80
   2  -8   3  548.95   13.30
  -8   3   2  578.14   13.70
  -8   3   2  539.15   12.70
  -3  -2  -8  544.05   13.40
  -2   8   3  549.74   13.20
   3   2  -8  543.65   13.10
   8  -3   2  517.25   13.20
   8  -3   2  541.15   13.20
   8   3  -2  532.45   13.50
  -8  -3  -2  563.14   13.20
  -3   2   8  551.94   13.40
  -8  -3  -2  565.14   13.60
   3   2  -8  540.95   12.60
   2   8  -3  522.95   12.70
   2  -8  -3  549.65   13.40
   8   3   2  557.94   13.20
   8  -3  -2  552.94   13.50
   8   3   2  545.25   13.60
   3   2   8  530.95   13.30
  -8  -3   2  547.05   12.60
  -2   8  -3  543.45   13.40
   2   8   3  504.75   13.20
   3  -2  -8  544.25   13.30
  -8   3  -2  545.85   13.20
   3   2   8  527.15   13.20
  -2  -8   3  537.35   12.70
  -2  -8   3  506.75   13.10
   2   8   3  517.25   13.40
  -3  -2   8  532.65   12.60
  -2   8  -3  521.55   12.50
  -3  -2   8  545.25   13.00
   2  -8  -3  538.95   13.30
   8  -3  -2  545.65   12.60
  -3   2  -8  553.44   12.90
  -3   2  -8  556.54   13.50
  -8  -3   2  561.34   13.60
  -8   3  -2  561.84   13.40
   3  -2  -8  534.85   12.60
   8  -4   2    8.00    2.10
  -8  -4  -2    7.50    2.00
   8  -4   2    4.90    1.90
  -2   8   4    6.00    1.90
   4  -2   8    9.30    2.30
   8   4  -2    8.10    1.60
   2   8  -4    8.40    1.90
   2  -8   4    6.70    1.00
  -8   4   2    8.30    1.70
  -4  -2  -8    5.70    1.80
  -4  -2  -8    8.30    2.20
   8   4  -2    7.50    2.10
   4   2  -8    7.30    1.40
  -2  -8  -4    6.80    2.00
  -8   4   2   10.40    2.10
   4  -2   8    6.80    1.50
   4   2  -8    5.90    1.90
  -2   8   4    4.30    1.90
  -4   2   8    8.60    1.40
  -4   2   8    6.40    1.90
   2  -8   4    6.90    2.00
   2   8  -4    6.20    1.50
  -4   2  -8    7.90    1.60
   2   8   4    7.70    2.10
  -2   8  -4    6.00    1.10
   8  -4  -2   10.40    1.70
  -4  -2   8    6.60    1.30
  -4   2  -8    5.80    2.10
   2  -8  -4    5.30    1.90
   4  -2  -8    8.80    1.40
   4   2   8    8.80    2.00
  -8  -4   2    6.10    1.60
   8  -4  -2    4.70    2.00
  -8   4  -2    8.70    2.00
  -8   4  -2    5.90    2.00
  -2  -8   4    5.30    1.30
   4  -2  -8   11.00    2.10
  -2  -8   4    7.10    2.00
   8   4   2    4.70    1.90
  -4  -2   8    4.80    1.70
  -8  -4   2    7.00    1.90
   2   8   4    6.10    1.90
   4   2   8    7.70    2.10
   8   4   2    4.90    2.10
   2  -8  -4    4.20    1.90
   8  -5   2   52.59    3.70
  -8  -5  -2   56.99    3.70
  -2   8   5   49.80    3.80
  -2  -8  -5   56.69    4.00
  -5   2   8   56.39    2.50
   5   2  -8   59.49    2.60
   5   2  -8   48.80    3.70
   8  -5   2   55.39    3.70
  -8   5   2   60.49    3.30
  -5  -2  -8   53.19    4.10
   2   8  -5   59.29    3.80
   8   5  -2   61.19    4.30
  -5  -2  -8   45.50    4.10
   2  -8   5   54.69    3.70
   2   8  -5   52.39    2.80
   5  -2   8   55.79    3.20
   8   5  -2   50.59    3.20
  -8   5   2   62.39    4.10
   5  -2   8   49.80    4.10
   8  -5  -2   58.49    3.90
  -2  -8   5   54.69    2.70
   8   5   2   49.40    4.20
   8   5   2   60.19    3.80
  -8   5  -2   58.19    3.90
   2  -8  -5   55.19    3.70
  -5  -2   8   51.09    3.70
   2   8   5   53.49    4.20
   8  -5  -2   62.79    3.40
  -2  -8   5   49.50    3.60
  -8  -5   2   54.39    3.90
  -5  -2   8   50.39    2.40
   5   2   8   55.29    4.00
  -5   2  -8   60.19    3.50
  -8  -5   2   57.79    3.40
  -8   5  -2   50.39    3.90
   2  -8  -5   48.40    3.80
   5  -2  -8   50.39    2.60
   5  -2  -8   60.69    3.90
   8  -6   2   23.50    2.50
  -6  -2  -8   20.80    2.70
  -6   2   8   23.70    1.80
  -8  -6  -2   21.50    2.40
  -2  -8  -6   22.50    2.50
   2   8  -6   23.30    1.70
   6  -2   8   19.40    2.70
   6   2  -8   22.80    2.50
   6   2  -8   26.10    2.00
  -8   6   2   26.70    2.30
   2   8  -6   23.70    2.40
   8  -6   2   25.20    2.30
  -2   8   6   19.50    2.30
   2  -8   6   23.60    2.60
   6  -2   8   25.80    2.10
   8   6  -2   21.50    2.60
   8   6  -2   20.30    2.00
  -6   2  -8   23.90    2.20
  -6  -2   8   24.40    1.80
   8  -6  -2   24.60    2.50
  -6  -2   8   24.00    2.40
   2  -8  -6   23.50    2.40
  -2  -8   6   22.00    1.50
   2   8   6   21.70    2.60
   8   6   2   23.10    2.70
  -8   6  -2   23.70    2.40
  -8  -6   2   24.80    2.20
  -2  -8   6   26.40    2.40
   8   6   2   24.80    2.50
   2  -8  -6   20.90    2.60
   8  -6  -2   27.30    2.30
   6   2   8   23.60    2.50
   6  -2  -8   23.80    2.60
   6  -2  -8   22.20    2.00
   2   8  -7    0.00    1.90
   2  -8   7    1.70    2.00
  -7   2   8    2.40    0.90
   7  -2   8    2.10    2.30
   8   7  -2    0.00    1.70
   8  -7   2    0.00    2.00
   2   8  -7    0.50    1.30
  -8   7   2    4.30    1.80
   7  -2   8    0.70    1.60
  -8  -7  -2    2.00    2.00
   7   2  -8    0.00    2.00
   8  -7   2    0.10    1.80
  -7  -2  -8    0.00    2.20
   8   7  -2    0.30    2.20
  -2  -8  -7    1.40    2.00
   8   7   2    0.00    2.10
  -7   2  -8    4.20    1.80
   8  -7  -2    0.30    1.80
  -2  -8   7    3.80    1.90
  -8  -7   2    0.00    1.80
   8  -7  -2    1.00    2.00
   7  -2  -8    0.00    2.00
   2  -8  -7    0.00    1.90
   2  -8  -7    0.10    1.90
   7   2   8    0.00    1.90
  -2  -8   7    0.50    1.10
  -8   7  -2    0.00    1.80
   7  -2  -8    0.00    1.00
   2   8   7    1.10    2.10
   8   0  -3    0.20    1.20
   3   8   0    0.00    1.70
   3   8   0    0.50    1.70
   0   3   8    0.00    1.70
   0  -3  -8    0.00    1.70
   8   0  -3    0.00    1.10
  -8   0  -3    0.00    1.60
   8   0  -3    0.00    1.80
   8   0   3    0.00    1.80
  -3  -8   0    0.00    1.40
  -3  -8   0    0.00    1.80
  -3   8   0    0.50    1.50
  -3   8   0    1.40    1.80
   0  -3  -8    0.00    1.70
   0   3   8    1.00    1.60
   8   0   3    0.00    1.70
   0  -3   8    0.00    1.60
   0   3  -8    0.40    1.20
   0   3  -8    0.00    1.70
  -8   0   3    0.00    1.70
   3  -8   0    1.60    1.50
   3  -8   0    2.20    1.80
   8   0   3    0.00    1.90
   0  -3   8    0.60    1.20
  -3  -8  -1 1329.27   32.30
  -3   8   1 1431.36   32.30
   8  -1   3 1450.95   32.60
   1  -3   8 1398.76   32.10
  -1   3   8 1421.16   32.60
  -1  -3  -8 1493.55   32.70
  -8  -1  -3 1437.76   32.20
   8   1  -3 1452.95   31.40
  -3  -8  -1 1377.96   32.20
   3  -8   1 1460.55   32.30
  -1  -3  -8 1413.36   32.10
   1  -3   8 1436.96   31.90
   3   8  -1 1375.76   32.20
   1   3  -8 1404.66   31.90
   1   3  -8 1414.76   31.90
   8   1  -3 1446.86   32.70
  -3   8   1 1428.06   32.20
   3  -8   1 1418.76   32.10
  -8  -1  -3 1517.95   32.80
   8  -1   3 1446.56   32.20
  -1   3   8 1441.66   31.90
   3   8  -1 1363.66   32.10
  -8   1   3 1413.56   31.40
  -8   1   3 1519.65   32.90
   8  -1  -3 1436.46   32.70
   8   1   3 1436.16   32.20
  -3  -8   1 1431.16   32.20
  -1   3  -8 1414.76   31.90
  -1   3  -8 1401.46   32.10
  -1  -3   8 1355.46   31.80
  -3  -8   1 1402.36   32.20
  -1  -3   8 1402.86   31.90
   1   3   8 1479.05   32.20
  -3   8  -1 1415.56   32.10
   8   1   3 1439.86   32.70
   3   8   1 1351.26   32.40
  -3   8  -1 1367.06   32.20
   1  -3  -8 1430.46   32.60
   3  -8  -1 1422.06   32.30
   3   8   1 1340.97   32.10
   3  -8  -1 1491.25   32.30
   8  -1  -3 1395.26   31.40
  -8  -1   3 1486.95   32.80
   1   3   8 1435.26   32.50
  -8  -1   3 1395.06   31.40
  -8   1  -3 1446.86   32.60
   1  -3  -8 1436.66   31.90
   3   8  -2  532.85   13.00
   8  -2   3  540.95   13.20
   2   3  -8  517.75   12.80
   3  -8   2  538.95   12.70
   2  -3   8  539.25   13.30
  -3   8   2  545.55   13.30
  -8  -2  -3  561.74   13.60
  -8  -2  -3  550.34   13.30
  -2   3   8  542.75   13.40
   8  -2   3  545.85   13.30
   3  -8   2  542.85   13.30
   8   2  -3  535.65   13.50
   8   2  -3  538.05   12.40
  -8   2   3  548.45   12.50
  -3  -8  -2  501.65   13.30
  -3  -8  -2  553.24   13.40
   2  -3   8  535.55   12.60
   3   8  -2  515.15   13.20
   2  -3   8  531.65   12.60
  -8   2   3  559.64   13.60
  -2  -3  -8  523.55   13.10
  -2   3   8  539.05   12.80
   2   3  -8  528.25   12.80
  -3   8   2  546.85   13.30
  -8   2  -3  548.15   13.40
  -8   2  -3  552.64   13.30
  -3   8  -2  521.85   13.30
   2  -3  -8  542.75   13.40
  -8  -2   3  567.94   13.70
   2  -3  -8  547.55   12.80
   3   8   2  536.65   13.30
  -3  -8   2  525.35   12.90
  -8  -2   3  542.25   12.40
  -2  -3   8  546.45   12.90
   3   8   2  547.95   13.50
   2   3   8  532.15   13.40
   2   3   8  534.35   13.40
   2   3   8  549.05   13.30
   3  -8  -2  553.14   13.30
   3  -8  -2  561.94   13.30
   8  -2  -3  541.95   13.50
   8   2   3  542.65   13.50
  -3  -8   2  539.95   13.20
  -3   8  -2  519.75   12.70
   8  -2  -3  535.05   12.40
  -2   3  -8  545.25   13.30
  -2  -3   8  537.85   12.80
   8   2   3  551.24   13.30
   3  -3   8 1790.02   39.80
  -8  -3  -3 1767.42   39.70
   3  -8   3 1789.62   39.80
   3   8  -3 1696.03   39.70
  -3   3   8 1759.32   40.20
   3   3  -8 1740.93   39.70
  -3   8   3 1768.52   40.10
  -3  -8  -3 1691.23   39.70
   8  -3   3 1792.52   39.70
  -3   3   8 1758.92   39.20
   3   8  -3 1738.03   39.60
   3   3  -8 1725.53   39.20
  -3  -8  -3 1773.02   40.20
  -8   3   3 1870.21   40.40
  -3  -3  -8 1785.82   39.80
   3  -8   3 1751.02   39.30
   8  -3   3 1784.42   40.00
  -3   8   3 1761.02   39.60
   8   3  -3 1826.32   40.30
   8   3  -3 1740.43   39.00
  -8   3   3 1773.52   39.10
   3  -3   8 1708.83   39.50
   3  -8  -3 1788.92   40.10
  -3  -8   3 1764.52   39.60
  -3  -3   8 1798.22   39.20
  -8   3  -3 1794.12   39.80
  -3  -3   8 1734.43   39.70
   3   8   3 1750.82   40.20
  -3  -8   3 1674.13   39.60
   3   3   8 1764.62   40.20
   3   3   8 1787.92   39.80
  -8  -3   3 1743.93   39.00
   3  -3  -8 1771.12   40.20
  -3   3  -8 1789.42   39.80
   8  -3  -3 1789.92   39.00
  -8   3  -3 1821.12   40.10
  -3   8  -3 1706.43   39.30
  -8  -3   3 1830.32   40.30
  -3   3  -8 1761.62   39.50
   8   3   3 1791.52   40.30
   8   3   3 1781.92   39.70
   3  -8  -3 1787.82   39.70
   8  -3  -3 1816.52   40.30
   3  -3  -8 1769.02   39.20
   3  -8   4   67.29    2.60
   3   8  -4   68.29    3.80
   3   8  -4   70.49    3.60
   8  -4   3   74.49    3.90
  -4  -3  -8   70.09    4.40
   4  -3   8   60.39    3.20
   4  -3   8   75.69    4.40
   4   3  -8   68.89    3.80
  -8  -4  -3   68.09    4.00
  -3   8   4   70.19    4.30
  -3  -8  -4   72.99    4.20
   4   3  -8   69.99    3.10
  -4  -3  -8   74.69    4.50
  -3   8   4   67.19    4.10
   8   4  -3   70.29    4.10
   8  -4   3   69.29    4.10
   8   4  -3   67.89    3.20
  -8   4   3   74.39    3.30
   3  -8   4   67.89    4.20
  -4   3   8   70.89    3.00
   4  -3  -8   69.79    4.00
  -8   4  -3   66.99    4.00
  -8  -4   3   63.39    3.10
   3   8   4   72.89    4.30
   8   4   3   77.49    4.60
   4  -3  -8   70.89    3.20
  -3   8  -4   62.59    2.60
  -4  -3   8   69.69    3.00
  -3  -8   4   67.79    3.30
  -4   3  -8   65.49    3.40
   8   4   3   69.49    4.10
   8  -4  -3   78.89    4.20
  -8   4  -3   66.89    4.20
  -8  -4   3   80.09    4.50
   4   3   8   68.09    4.10
  -4  -3   8   72.19    3.70
   8  -4  -3   76.99    3.20
   3  -8  -4   70.99    4.00
  -3  -8   4   69.69    3.90
   3  -8  -4   70.89    3.90
   8   5  -3 1689.93   37.50
  -5   3   8 1611.34   36.10
   5   3  -8 1641.34   36.10
   5  -3   8 1667.53   37.20
   3   8  -5 1620.14   36.80
   5   3  -8 1634.94   37.10
   3  -8   5 1588.74   36.20
   5  -3   8 1628.24   36.70
  -8  -5  -3 1640.14   37.00
   3  -8   5 1563.74   36.90
  -8   5   3 1688.03   36.50
  -3  -8  -5 1623.34   37.00
  -3   8   5 1619.84   36.70
   8  -5   3 1633.74   37.10
   8  -5   3 1572.44   36.90
  -5  -3  -8 1645.84   37.20
   3   8  -5 1655.63   36.70
   8   5  -3 1605.94   36.30
   3  -8  -5 1659.13   36.80
   3   8   5 1694.63   37.60
  -8   5  -3 1705.33   37.20
  -3  -8   5 1622.24   36.70
  -5   3  -8 1660.53   36.80
   5   3   8 1605.04   37.40
   8  -5  -3 1665.43   36.40
   3  -8  -5 1625.64   37.40
  -3   8  -5 1603.24   36.20
   5  -3  -8 1608.74   36.10
   8  -5  -3 1632.24   37.40
   5  -3  -8 1644.54   37.50
  -8  -5   3 1676.93   37.40
   8   5   3 1666.63   37.00
  -5  -3   8 1643.64   36.10
  -3  -8   5 1572.74   36.60
   8   5   3 1595.14   37.50
  -8  -5   3 1655.63   36.40
  -5  -3   8 1616.14   37.10
  -8  -6  -3   23.20    2.60
   6  -3   8   28.60    2.10
   8   6  -3   24.60    2.10
   3   8  -6   31.80    2.70
  -6   3   8   26.00    1.60
   8   6  -3   27.00    2.70
   8  -6   3   27.30    2.60
   3   8  -6   27.10    2.40
   3  -8   6   21.40    2.70
  -8   6   3   34.00    3.10
   6   3  -8   26.70    2.20
   8  -6   3   24.60    2.30
   6  -3   8   28.80    2.90
   6   3  -8   22.60    2.50
  -3   8   6   26.10    2.40
  -3  -8  -6   25.20    2.60
  -6  -3  -8   17.30    2.70
  -8  -6   3   22.00    2.20
   8  -6  -3   26.20    2.60
   6  -3  -8   24.70    1.70
  -6  -3   8   30.20    2.00
   6  -3  -8   27.70    2.70
   6   3   8   21.50    2.60
  -6   3  -8   31.30    2.20
  -3  -8   6   27.90    2.50
  -8   6  -3   23.30    2.30
   3   8   6   24.70    2.70
   8   6   3   19.60    2.80
   8  -6  -3   29.80    2.30
   3  -8  -6   26.80    2.50
   3  -8  -6   24.70    2.70
  -6  -3   8   22.60    2.40
  -3  -8   6   37.80    3.40
   8  -7   3    5.40    1.90
  -8  -7  -3   10.10    2.30
   7   3  -8    9.90    1.20
   3   8  -7   11.80    2.10
   8   7  -3   12.10    2.40
   7   3  -8    5.60    2.20
   3  -8   7    6.40    2.30
   7  -3   8   11.00    1.80
   7  -3   8    9.30    2.40
  -3  -8  -7    9.90    2.30
  -3   8   7    6.10    2.00
   8  -7   3   10.20    2.40
  -8   7   3   11.10    2.00
   8   7  -3    4.50    1.80
  -7   3   8   11.00    1.20
   3   8  -7   10.40    1.60
  -7  -3  -8    6.10    2.50
   3  -8  -7    5.90    2.30
  -8  -7   3    9.50    2.00
  -8   7  -3    8.40    2.00
   7  -3  -8    8.90    1.30
  -7  -3   8   12.40    1.20
   8  -7  -3   13.40    2.30
   7   3   8   13.20    2.30
   8  -7  -3   10.80    2.00
   3   8   7   12.00    2.40
   7  -3  -8   13.40    2.30
   3  -8  -7    8.50    2.10
  -7   3  -8   11.20    1.90
  -3  -8   7   10.80    1.50
  -3  -8   7   12.00    2.10
   8   7   3    3.90    2.30
   0   4  -8    5.30    1.20
   0   4   8    3.90    1.80
   0  -4   8    7.00    1.80
   0  -4   8    6.10    1.20
   0   4   8    4.20    1.70
  -4  -8   0    4.40    1.60
   8   0  -4    7.00    1.00
  -8   0   4    4.80    2.00
  -4   8   0    3.40    1.90
   4  -8   0    5.40    1.60
   4  -8   0    5.80    1.90
  -8   0  -4    6.50    1.90
   4   8   0    4.20    1.80
   4   8   0    2.60    1.80
   8   0  -4    3.70    2.00
  -4  -8   0    3.10    1.90
  -4   8   0    2.80    1.60
   0  -4  -8    4.60    1.90
   0  -4  -8    4.80    1.80
   8   0   4    5.90    1.90
   8   0  -4    5.80    1.00
   8   0   4    4.40    1.90
   8   0   4    6.20    2.20
   0   4  -8    4.20    1.90
  -1   4   8   17.60    2.20
   8  -1   4   16.40    2.10
   8  -1   4   17.80    2.40
   8   1  -4   15.40    1.20
  -1   4   8   15.00    1.80
   4  -8   1   14.40    1.70
   4  -8   1   18.80    2.30
  -4  -8  -1   16.90    2.20
   1  -4   8   19.30    1.40
  -8   1   4   16.20    2.30
  -8   1   4   15.40    1.30
  -8  -1  -4   19.00    2.20
  -8  -1  -4   17.80    2.30
  -4   8   1   19.50    2.20
  -1  -4  -8   20.80    2.30
  -1  -4  -8   17.60    2.20
   1   4  -8   16.60    2.00
   4   8  -1   17.10    2.10
   4   8  -1   16.50    2.10
   1  -4   8   18.40    2.20
   1   4  -8   15.60    1.50
  -4   8   1   15.10    2.00
  -4  -8  -1   17.70    2.00
   8   1  -4   17.70    2.40
  -4  -8   1   15.10    1.90
  -4   8  -1   14.10    1.70
  -4   8  -1   16.30    2.20
  -1  -4   8   15.70    1.90
   1   4   8   17.10    2.10
   1   4   8   16.40    2.10
   4  -8  -1   16.60    1.90
   4  -8  -1   18.30    2.20
  -1  -4   8   17.80    1.50
   8   1   4   17.70    2.30
  -8  -1   4   20.60    1.80
  -8   1  -4   16.90    2.10
  -1   4  -8   16.30    1.40
  -1   4  -8   14.70    2.20
   8  -1  -4   17.10    1.20
   1  -4  -8   16.00    2.00
   4   8   1   12.80    2.10
   4   8   1   16.20    2.10
   8  -1  -4   19.00    2.40
   1  -4  -8   16.10    2.20
  -8  -1   4   18.50    2.30
   8   1   4   15.90    2.20
  -4  -8   1   16.20    2.20
   4  -8   2    5.70    1.40
  -2  -4  -8    7.10    2.10
   2  -4   8    7.50    1.20
  -4  -8  -2    3.30    1.80
  -4   8   2    5.80    1.90
   2   4  -8    4.80    1.50
   2   4  -8    1.90    1.70
  -8   2   4    6.30    1.30
   8  -2   4    9.30    2.00
  -2   4   8    6.40    2.00
  -2   4   8    3.00    1.60
   8   2  -4    5.00    1.10
  -8  -2  -4    2.50    2.00
   2  -4   8    7.10    1.20
  -4   8   2    7.60    1.80
   4   8  -2    5.00    1.80
   4   8  -2    4.50    1.90
   4  -8   2    5.80    2.00
  -8  -2  -4    8.10    2.00
  -4  -8  -2    5.90    2.00
   2  -4   8    4.90    2.00
   8  -2   4    8.70    2.20
   8   2  -4    4.60    2.20
   8  -2  -4   10.70    1.20
  -2  -4   8    5.90    1.70
  -4  -8   2    6.50    2.00
  -4  -8   2    6.90    1.60
   4  -8  -2    8.00    2.00
  -4   8  -2    4.20    1.50
  -2  -4   8    7.90    1.40
  -8   2  -4    8.20    1.90
  -8   2  -4    4.80    2.10
   8   2   4    5.00    2.10
   2  -4  -8    5.90    1.70
  -8  -2   4    4.00    2.00
  -8  -2   4    7.30    1.20
   4  -8  -2    5.90    1.80
   2   4   8    9.20    2.00
   8   2   4    6.30    2.10
   2  -4  -8    6.80    2.00
  -2   4  -8    4.30    2.00
   4   8   2    5.60    2.00
   4   8   2    7.30    2.00
   8  -2  -4    5.10    2.00
   2   4   8    8.40    2.10
   2   4   8    8.30    2.00
  -3   4   8   68.19    3.40
   4   8  -3   72.29    3.90
  -8  -3  -4   65.19    4.00
   3   4  -8   68.59    3.50
   8   3  -4   73.19    4.20
   4  -8   3   65.89    3.00
   4  -8   3   70.19    4.10
  -4   8   3   75.49    4.20
  -4   8   3   67.19    4.00
  -3  -4  -8   65.79    3.90
   4   8  -3   67.89    3.80
   8  -3   4   76.29    4.10
   8   3  -4   71.09    2.90
  -8   3   4   67.99    2.90
   3   4  -8   70.29    3.40
   8  -3   4   73.19    3.90
  -4  -8  -3   65.69    4.20
   3  -4   8   65.99    2.90
   3  -4   8   62.59    4.00
  -4  -8  -3   70.29    4.50
  -4   8  -3   65.69    3.10
  -8   3  -4   75.09    4.40
   8   3   4   66.79    4.30
  -8   3  -4   74.69    4.30
   4  -8  -3   67.99    4.10
   4  -8  -3   68.09    4.00
  -3  -4   8   65.69    3.20
  -3  -4   8   67.39    3.20
  -3   4  -8   75.09    3.10
   3  -4  -8   72.49    3.50
   3   4   8   72.09    4.60
   3   4   8   81.29    4.20
   8  -3  -4   71.89    2.90
  -3   4  -8   60.69    4.00
  -8  -3   4   71.39    4.50
   3  -4  -8   79.99    4.10
   3   4   8   65.39    3.90
   4   8   3   65.99    4.20
  -8  -3   4   67.99    2.90
   8   3   4   73.89    4.30
   8  -3  -4   73.29    4.20
  -4  -8   3   73.59    3.50
  -4  -8   3   74.89    3.90
   8  -4   4    4.80    2.10
  -4  -8  -4    3.00    2.10
   8   4  -4    0.30    2.10
   4   8  -4    3.90    1.80
  -4  -4  -8    4.00    2.20
  -4   8   4    3.30    1.90
  -8  -4  -4    2.50    2.10
   8   4  -4    1.80    1.30
  -4   4   8    4.20    1.50
   4   8  -4    0.80    1.80
  -4   8   4    0.00    1.90
   4  -4   8    3.70    2.20
   8  -4   4    0.60    1.80
  -8   4   4    4.90    1.50
   4  -4   8    2.60    1.30
   4  -8   4    3.30    1.20
   4  -8   4    3.50    2.10
   4   4  -8    4.40    1.60
   4   4  -8    2.60    1.80
  -4   4  -8    4.50    1.40
  -4   8  -4    3.60    1.30
  -4  -4   8    2.00    1.60
   4  -8  -4    4.70    2.00
   8  -4  -4    5.80    1.50
  -8  -4   4    1.90    1.40
  -4  -8   4    3.40    1.50
   4  -4  -8    4.60    2.10
   4  -4  -8    2.80    1.60
   4  -8  -4    2.00    2.00
  -8  -4   4    2.00    2.00
   4   4   8    4.20    2.10
  -4  -8   4    5.60    2.00
   8   4   4    0.00    2.10
   4   8   4    4.00    2.10
   8  -4  -4    5.30    2.20
  -4  -4   8    6.40    1.50
  -8   4  -4    1.00    1.80
   4  -8   5    0.90    1.10
   4   8  -5    3.10    1.90
   5   4  -8    2.00    1.50
   5   4  -8    0.20    1.90
   8  -5   4    2.90    1.80
   8   5  -4    0.70    1.50
   5  -4   8    2.30    1.40
  -8   5   4    4.00    1.60
   5  -4   8    4.30    2.30
   4   8  -5    2.90    1.80
  -5  -4  -8    0.00    2.30
  -8  -5  -4    2.40    2.20
   8   5  -4    2.90    2.20
   4  -8   5    0.00    2.10
  -5   4   8    0.00    1.40
  -4  -8  -5    4.30    2.10
   8  -5   4    4.00    2.20
  -4   8   5    0.00    1.90
   5  -4  -8    2.40    2.10
  -4   8  -5    0.00    1.20
  -4  -8   5    4.70    1.50
  -5  -4   8    5.50    1.40
   4  -8  -5    0.00    1.90
   8   5   4    0.30    2.10
   8  -5  -4    3.40    1.60
   8  -5  -4    4.40    2.20
   5   4   8    4.00    2.20
   4   8   5    3.10    2.20
  -8  -5   4    2.90    1.60
  -8  -5   4    0.40    1.90
  -8   5  -4    1.30    1.80
   4  -8  -5    0.60    2.10
  -5  -4   8    0.00    1.70
  -4  -8   5    4.00    1.90
  -5   4  -8    3.00    1.50
   5  -4  -8    0.20    1.50
  -8  -6  -4 2047.40   47.20
   8  -6   4 2126.89   47.30
   8   6  -4 2054.79   47.70
   6   4  -8 2094.99   47.50
  -4  -8  -6 2123.69   47.40
   8   6  -4 2046.30   46.60
   6  -4   8 2110.19   47.00
   6  -4   8 2074.29   47.40
  -6   4   8 2119.19   46.30
   6   4  -8 2141.09   46.30
  -4   8   6 2049.29   46.90
   4  -8   6 2052.19   46.50
   4  -8   6 2015.20   47.20
   4   8  -6 2064.19   47.10
   4   8  -6 2116.29   46.90
  -6  -4  -8 2106.49   47.40
  -8   6   4 2144.89   46.70
   8  -6   4 2153.98   47.30
   8   6   4 2126.49   48.00
  -6   4  -8 2134.79   47.10
   4   8   6 2101.39   47.90
  -4  -8   6 2071.89   47.00
   4  -8  -6 2140.39   47.00
   6  -4  -8 2085.69   46.30
  -4  -8   6 2076.79   46.90
   6   4   8 2162.18   47.90
   8  -6  -4 2095.19   47.80
   8  -6  -4 2175.98   46.70
  -8  -6   4 2105.99   46.60
  -8   6  -4 2139.29   47.30
  -6  -4   8 2150.18   46.30
  -4   8  -6 2044.70   46.50
  -6  -4   8 2103.79   47.50
   6  -4  -8 2136.59   47.90
   4  -8  -6 2120.69   47.90
  -4   8   7  281.97    8.10
   7   4  -8  281.57    8.20
   7   4  -8  291.07    7.20
   4  -8   7  289.77    8.60
   8   7  -4  283.27    7.80
  -8  -7  -4  276.07    8.30
   8  -7   4  280.37    8.40
   4   8  -7  290.07    8.00
  -8   7   4  295.47    7.90
  -4  -8  -7  298.97    8.60
   4   8  -7  276.07    7.70
   7  -4   8  284.57    7.70
   8  -7   4  278.27    7.90
  -7   4   8  284.67    7.20
  -7  -4  -8  287.17    8.70
   7  -4   8  297.37    8.80
   8   7  -4  290.17    8.40
  -4  -8   7  265.37    7.50
  -7  -4   8  281.07    8.30
   4   8   7  291.47    8.80
   7  -4  -8  287.27    8.60
  -7   4  -8  306.87    7.90
  -8  -7   4  287.57    7.80
   7   4   8  291.67    8.80
  -4  -8   7  293.47    7.90
   8   7   4  296.27    8.90
  -7  -4   8  296.47    7.10
   8  -7  -4  294.27    7.80
  -8   7  -4  284.77    8.10
   4  -8  -7  282.67    8.00
   4  -8  -7  283.57    8.60
   7  -4  -8  281.27    7.20
   8  -7  -4  297.27    8.70
  -5   8   0    1.30    1.70
   0   5  -8    0.00    1.90
   0  -5   8    0.70    1.00
   8   0   5    0.00    2.30
   0   5  -8    0.00    1.10
  -5  -8   0    1.70    1.90
   0  -5  -8    0.10    1.90
   0  -5  -8    2.10    1.90
   5  -8   0    0.00    1.60
   8   0   5    4.20    2.00
   5   8   0    0.40    1.80
   8   0  -5    1.00    2.00
  -5  -8   0    0.00    1.70
   0  -5   8    0.50    1.80
  -5   8   0    1.00    2.00
  -8   0  -5    2.90    1.90
   5  -8   0    1.70    1.90
   5   8   0    0.00    1.90
   0   5   8    0.00    1.70
   1  -5   8  417.46    9.90
  -5  -8  -1  409.76   10.90
  -8  -1  -5  457.55   11.40
   8  -1   5  434.56   11.40
   1   5  -8  409.06   10.70
  -5  -8  -1  442.26   11.30
   5   8  -1  433.06   11.10
   5   8  -1  424.46   10.90
  -8  -1  -5  427.36   11.20
   5  -8   1  431.16   11.10
   8  -1   5  441.26   11.10
   8   1  -5  419.76   11.20
  -5   8   1  429.66   11.00
   1  -5   8  414.86   10.90
   1   5  -8  412.96   10.10
  -1  -5  -8  429.36   11.00
   5  -8   1  424.26   10.70
  -1   5   8  439.06   10.80
  -5   8   1  433.66   11.00
  -1  -5  -8  442.06   11.30
   5   8   1  448.26   11.30
   8  -1  -5  443.46   11.40
   5  -8  -1  433.96   10.90
   5  -8  -1  431.46   11.00
  -1  -5   8  416.56   10.10
  -8   1  -5  454.65   11.20
  -1  -5   8  441.16   10.80
  -1   5  -8  411.36   10.00
   1  -5  -8  438.06   11.30
   8   1   5  443.46   11.30
   1  -5  -8  435.26   10.90
  -5  -8   1  432.86   10.90
  -5   8  -1  424.86   10.70
  -5  -8   1  417.26   11.00
   5   8   1  424.16   11.00
   1   5   8  426.16   11.00
  -1   5  -8  421.56   11.00
   2  -5   8   52.79    2.30
   5   8  -2   53.89    3.70
   8   2  -5   47.60    3.90
   5  -8   2   49.70    3.60
   5  -8   2   55.99    3.10
  -8  -2  -5   50.69    3.80
   2  -5   8   56.39    2.30
  -5   8   2   56.39    3.70
   2   5  -8   48.30    2.80
  -2   5   8   49.99    3.50
  -8   2   5   57.49    2.30
  -5  -8  -2   54.99    3.70
   2  -5   8   51.79    3.60
   8   2  -5   53.79    2.20
   5   8  -2   63.49    3.80
  -2  -5  -8   56.89    3.90
  -5  -8  -2   64.49    4.40
   2   5  -8   51.69    3.50
  -5   8   2   58.59    3.90
   8  -2   5   53.09    3.80
   8  -2   5   57.89    3.70
   2  -5  -8   50.69    3.90
  -5  -8   2   56.89    3.70
   5  -8  -2   55.09    3.50
   5   8   2   55.59    4.30
  -2  -5   8   54.69    2.90
   2   5   8   49.80    4.10
  -2  -5   8   60.79    3.30
   5  -8  -2   58.19    3.70
   8   2   5   57.19    4.00
  -8  -2   5   57.49    4.00
   8  -2  -5   56.59    2.20
   2   5   8   53.49    4.00
  -5   8  -2   52.09    3.30
   8  -2  -5   58.69    4.10
  -8   2  -5   59.59    3.90
  -5  -8   2   56.29    3.60
   2  -5  -8   51.99    3.40
  -2   5  -8   57.09    4.10
   5  -8   3 1636.54   37.10
   5   8  -3 1691.23   37.20
   8  -3   5 1669.33   37.10
   3   5  -8 1600.94   36.50
   3  -5   8 1651.43   37.10
   5  -8   3 1589.54   36.60
  -5   8   3 1655.73   36.80
   5   8  -3 1650.83   36.80
   8   3  -5 1639.24   36.00
  -8   3   5 1644.24   36.00
  -3  -5  -8 1603.64   37.00
  -8  -3  -5 1672.33   37.10
  -5   8   3 1610.74   37.30
  -5  -8  -3 1641.84   37.10
   3   5  -8 1584.14   36.70
   3  -5   8 1595.04   36.30
   8   3  -5 1623.34   37.40
  -3   5   8 1591.34   36.50
   8  -3   5 1569.74   37.00
  -5  -8   3 1685.43   36.80
  -8   3  -5 1694.03   37.20
   5  -8  -3 1668.23   37.40
  -3  -5   8 1654.73   36.50
   5   8   3 1629.24   37.50
   8   3   5 1631.04   37.50
   8  -3  -5 1700.03   36.10
  -5  -8   3 1623.84   37.00
   3  -5  -8 1620.94   36.50
   3   5   8 1684.43   37.60
   5  -8  -3 1668.33   36.80
   3  -5  -8 1613.54   37.50
  -5   8  -3 1596.74   36.70
   8  -3  -5 1643.74   37.50
  -8  -3   5 1626.74   37.40
  -8  -3   5 1618.24   36.00
  -3  -5   8 1611.44   36.70
   5  -8   4    0.60    1.40
  -4   5   8    0.90    1.50
   5  -8   4    0.80    2.20
  -8   4   5    5.40    1.40
   8  -4   5    2.30    1.80
   4  -5   8    0.30    1.20
  -5  -8  -4    0.50    2.10
   4   5  -8    3.40    1.70
   5   8  -4    4.00    1.90
   8   4  -5    2.90    2.10
   4   5  -8    0.00    1.70
   5   8  -4    0.00    1.80
   8   4  -5    0.00    1.30
  -5   8   4    1.90    1.90
  -4  -5  -8    1.80    2.20
   4  -5   8    2.70    2.30
   8  -4   5    2.80    2.30
  -8  -4  -5    0.00    2.20
  -4  -5   8    1.90    1.50
   8  -4  -5    4.10    1.40
  -4   5  -8    2.90    1.30
   8  -4  -5    4.40    2.20
  -5  -8   4    1.70    1.90
   5  -8  -4    0.20    2.10
   5  -8  -4    3.90    2.00
  -5   8  -4    0.20    1.50
   5   8   4    3.60    2.20
  -8  -4   5    2.70    2.00
  -8  -4   5    0.00    1.30
   4   5   8    0.00    2.10
  -5  -8   4    2.50    1.60
   4  -5  -8    1.90    1.70
  -8   4  -5    0.60    1.80
   4  -5  -8    0.00    2.10
  -4  -5   8    0.00    1.60
   8   4   5    3.20    2.20
   8   5  -5 1263.17   28.50
   5  -8   5 1242.78   28.70
   5   5  -8 1270.57   29.30
  -5  -8  -5 1240.38   29.40
   5   5  -8 1273.47   28.70
  -5   5   8 1298.97   28.70
  -5  -5  -8 1262.87   29.50
   5  -8   5 1284.97   29.50
   8   5  -5 1287.37   29.70
   8  -5   5 1323.77   29.60
  -5   8   5 1300.67   29.10
   5   8  -5 1265.47   29.00
   5  -5   8 1243.58   28.70
   8  -5   5 1290.87   29.20
  -8   5   5 1309.57   28.60
   5   8  -5 1260.07   29.20
  -8  -5  -5 1232.98   29.40
   5  -5   8 1288.07   29.60
  -5  -5   8 1318.37   28.70
   8  -5  -5 1288.37   29.90
   5   8   5 1258.27   29.90
  -5   8  -5 1261.27   28.70
  -5  -8   5 1273.97   29.00
   5  -5  -8 1280.37   28.70
  -8  -5   5 1290.87   28.60
   5  -5  -8 1266.17   29.80
   5   5   8 1281.27   29.90
   8  -5  -5 1302.87   28.60
  -5  -8   5 1263.17   29.20
  -5  -5   8 1292.27   29.30
   8   5   5 1293.37   29.90
   5  -8  -5 1274.37   29.10
   5  -8  -5 1270.47   29.70
  -5   5  -8 1288.87   28.80
  -8   5  -5 1284.37   29.30
   8   6  -5  717.93   17.10
   8   6  -5  746.83   18.10
  -8   6   5  745.83   17.20
  -6   5   8  740.83   17.00
   6  -5   8  724.53   17.20
   8  -6   5  758.52   18.10
   6   5  -8  745.83   17.80
   5  -8   6  711.23   16.90
  -5   8   6  728.33   17.50
   5  -8   6  720.33   17.90
   6  -5   8  767.82   18.20
   6   5  -8  745.03   17.00
  -6  -5  -8  712.73   18.00
   5   8  -6  738.53   17.60
  -5  -8  -6  746.03   18.00
  -8  -6  -5  719.23   17.90
   5   8  -6  725.23   17.50
   8  -6   5  729.33   17.50
   8  -6  -5  755.72   17.20
  -8   6  -5  735.23   17.60
   6   5   8  750.52   18.30
   6  -5  -8  742.23   17.10
   8   6   5  737.33   18.30
  -6   5  -8  750.22   17.30
   5  -8  -6  744.83   17.60
  -6  -5   8  749.23   17.00
  -6  -5   8  756.12   17.80
  -8  -6   5  746.13   17.10
  -5   8  -6  717.03   16.90
   8  -6  -5  768.52   18.30
   5  -8  -6  755.52   18.30
  -5  -8   6  740.63   17.50
   6  -5  -8  766.92   18.30
   5   8   6  734.93   18.30
  -5  -8   6  752.12   17.50
   7  -5   8  183.38    6.70
   7  -5   8  178.48    5.40
  -8   7   5  191.18    5.70
   8  -7   5  171.38    5.60
  -5  -8  -7  175.08    6.30
   7   5  -8  172.78    6.00
   7   5  -8  176.98    5.20
  -7   5   8  180.48    5.20
   8   7  -5  169.38    5.50
   8  -7   5  170.38    6.20
   5  -8   7  162.78    6.20
  -5   8   7  173.18    5.80
   8   7  -5  177.98    6.20
   5   8  -7  165.18    5.50
   5   8  -7  174.08    5.80
   5  -8   7  173.38    4.70
  -8  -7  -5  174.88    6.10
  -7  -5  -8  180.38    6.60
   8  -7  -5  183.68    5.50
   5   8   7  190.78    6.80
  -7  -5   8  191.88    5.10
  -8  -7   5  176.18    5.50
  -5  -8   7  195.58    5.80
   7  -5  -8  179.28    5.20
  -7  -5   8  171.88    6.10
   8   7   5  175.28    6.90
   7  -5  -8  185.58    6.50
   7   5   8  183.28    6.80
   8  -7  -5  177.28    6.40
   5  -8  -7  173.38    6.40
   5  -8  -7  176.48    5.80
  -5   8  -7  172.48    4.80
  -8   7  -5  157.48    5.60
  -7   5  -8  182.78    5.60
  -5  -8   7  173.88    5.60
   0  -6  -8  619.64   14.90
   0   6  -8  601.24   14.90
   6  -8   0  604.74   14.80
   6  -8   0  634.94   15.00
   6   8   0  614.34   15.10
  -8   0  -6  614.14   15.10
   0  -6   8  613.24   14.80
   0   6  -8  578.44   13.90
   0  -6  -8  629.14   15.40
   8   0   6  619.44   15.30
   8   0   6  624.94   15.10
  -6  -8   0  602.24   15.00
  -6  -8   0  616.74   14.90
  -6   8   0  628.34   14.90
   0  -6   8  599.64   13.90
   6   8   0  599.84   14.80
   8   0  -6  616.64   15.30
   0   6   8  616.34   14.80
   1   6  -8   76.29    3.90
  -6   8   1   78.89    4.20
   8   1  -6   85.99    4.40
   8  -1   6   93.19    4.90
  -6  -8  -1   78.49    4.30
  -1   6   8   80.59    4.20
   6   8  -1   82.29    4.20
   6  -8   1   79.79    3.70
  -8  -1  -6   80.49    4.60
  -6   8   1   83.29    4.40
  -1  -6  -8   82.79    4.40
  -1  -6  -8   77.79    4.30
   6   8  -1   85.39    4.50
   6  -8   1   85.19    4.30
   8  -1   6   77.29    4.10
   1   6  -8   83.89    3.00
   1  -6   8   83.69    4.20
  -1  -6   8   81.79    2.90
   6   8   1   84.89    4.70
  -6   8  -1   85.09    4.00
  -1  -6   8   83.39    3.90
  -6  -8   1   83.19    4.30
   1  -6  -8   73.49    3.90
   1  -6  -8   82.09    4.30
  -1   6  -8   81.79    4.40
   8   1   6   82.89    4.20
  -6  -8   1   82.39    4.10
  -8   1  -6   84.69    4.50
   8  -1  -6   74.89    4.40
   6  -8  -1   70.39    3.80
   6  -8  -1   81.09    4.20
  -2  -6  -8   23.60    2.50
   2  -6   8   26.70    2.60
  -2   6   8   22.80    2.20
   8   2  -6   20.70    2.60
   2   6  -8   22.00    2.30
  -6   8   2   22.60    2.40
  -6  -8  -2   24.60    2.50
   6   8  -2   20.00    2.30
   6  -8   2   22.90    2.50
  -8  -2  -6   20.10    2.70
   6   8  -2   24.30    2.50
  -6   8   2   22.60    2.40
   6  -8   2   20.40    2.00
   8  -2   6   25.50    2.30
   8  -2   6   24.50    2.70
   2   6  -8   26.00    2.30
   8   2   6   24.60    2.60
   2  -6  -8   21.00    2.20
   6  -8  -2   25.90    2.40
   2   6   8   29.30    2.80
   6  -8  -2   25.80    2.40
   8  -2  -6   23.40    2.60
  -2  -6   8   24.70    2.20
  -6  -8   2   23.10    2.30
   2  -6  -8   24.10    2.60
  -6   8  -2   22.10    2.10
  -8   2  -6   24.10    2.30
  -6  -8   2   19.00    2.10
   6   8   2   17.90    2.50
  -2  -6   8   23.80    1.60
   3   6  -8   23.50    2.20
   3   6  -8   27.30    2.00
  -6  -8  -3   24.40    2.60
  -3  -6  -8   27.40    2.70
   6  -8   3   23.20    2.00
   6  -8   3   22.10    2.60
   3  -6   8   24.60    2.70
   6   8  -3   22.20    2.30
   3  -6   8   22.40    1.70
  -3   6   8   23.40    2.20
  -6   8   3   30.60    2.50
   8  -3   6   29.20    2.30
   8  -3   6   24.40    2.70
   8   3  -6   20.50    2.60
   8   3  -6   27.70    2.00
   6   8  -3   27.70    2.50
  -8   3   6   29.10    2.10
  -8  -3  -6   20.50    2.80
   8   3   6   24.20    2.70
  -6  -8   3   26.50    2.30
  -3  -6   8   32.10    2.90
   8  -3  -6   27.70    2.80
   8  -3  -6   30.30    2.10
  -3  -6   8   24.30    1.80
   6   8   3   23.90    2.70
  -6   8  -3   22.80    2.10
  -8  -3   6   25.30    1.90
  -8   3  -6   28.90    2.40
  -6  -8   3   24.50    2.40
   3   6   8   25.70    2.70
   6  -8  -3   28.60    2.50
   6  -8  -3   33.80    2.50
   3  -6  -8   21.40    2.60
   3  -6  -8   22.60    2.30
   4   6  -8 2048.00   47.20
   4   6  -8 2089.29   46.80
   6  -8   4 2034.50   47.30
   4  -6   8 1974.90   47.30
  -8  -4  -6 2126.79   47.50
   6   8  -4 2096.19   46.90
  -4   6   8 2096.39   46.80
  -8   4   6 2147.49   46.40
  -6  -8  -4 2111.09   47.40
   8  -4   6 2107.49   47.40
   8  -4   6 2150.48   47.50
   8   4  -6 2165.68   47.90
   8   4  -6 2108.79   46.30
  -4  -6  -8 2125.09   47.40
   6  -8   4 2051.09   47.00
   6   8  -4 2178.88   47.60
   4  -6   8 2052.59   46.60
  -6   8   4 2167.18   47.00
   8  -4  -6 2083.29   47.90
   4  -6  -8 2143.99   46.80
  -8  -4   6 2076.49   46.30
   6  -8  -4 2171.58   47.00
  -8   4  -6 2096.29   47.40
   4  -6  -8 2102.89   48.00
   8  -4  -6 2133.79   46.30
  -4  -6   8 2092.59   46.70
  -4   6  -8 2096.69   46.70
   4   6   8 2127.19   48.00
   6  -8  -4 2176.98   47.90
   6   8   4 2145.39   48.00
  -4  -6   8 2076.49   47.20
  -6  -8   4 2069.99   46.90
  -6   8  -4 2118.19   47.10
   8   4   6 2134.89   48.00
  -6  -8   4 2062.99   47.40
   6  -8   5  713.63   17.90
  -8  -5  -6  728.03   17.90
   6   8  -5  723.93   17.60
  -5   6   8  721.53   17.10
  -6   8   5  748.33   17.50
   8  -5   6  725.13   17.90
   5  -6   8  703.53   16.90
   5  -6   8  758.12   18.10
   5   6  -8  729.23   17.50
   6  -8   5  744.93   17.10
  -6  -8  -5  736.83   17.90
  -5  -6  -8  736.43   18.00
   8  -5   6  753.62   17.50
   5   6  -8  728.53   17.20
   8   5  -6  716.63   17.90
  -8   5   6  756.52   16.90
   6   8  -5  707.73   17.40
   8   5  -6  751.22   16.90
  -8  -5   6  735.23   16.90
  -6   8  -5  732.63   17.10
  -5   6  -8  749.13   17.00
   6  -8  -5  743.93   18.10
  -8   5  -6  738.23   17.50
  -5  -6   8  741.13   17.20
   8   5   6  749.13   18.30
   5  -6  -8  773.32   18.30
   5  -6  -8  754.72   17.20
   8  -5  -6  770.52   18.40
   8  -5  -6  746.63   16.90
  -5  -6   8  731.63   17.50
  -6  -8   5  711.13   17.50
  -6  -8   5  744.33   17.50
   6   8   5  727.43   18.30
   5   6   8  740.73   18.20
   6  -8  -5  747.53   17.50
   6   6  -8  503.85   12.60
   6  -8   6  485.95   12.90
   8  -6   6  504.95   12.30
  -8   6   6  520.95   12.10
  -6  -8  -6  489.25   12.90
  -6   8   6  494.45   12.40
   6   6  -8  494.85   12.00
   6  -6   8  485.25   13.00
   6   8  -6  508.85   12.50
   6   8  -6  504.15   12.40
  -8  -6  -6  494.35   13.00
  -6  -6  -8  495.75   13.00
   6  -8   6  484.55   11.80
   8   6  -6  491.25   12.00
   8  -6   6  478.75   12.90
  -6   6   8  498.15   12.00
   8   6  -6  516.95   12.90
   6  -6   8  484.65   11.80
  -8  -6   6  487.95   11.90
   6  -8  -6  509.65   12.40
   6   6   8  513.95   13.30
   6  -6  -8  511.05   13.10
   6   8   6  503.55   13.30
   8  -6  -6  515.55   13.10
  -6   8  -6  489.65   11.90
  -6  -6   8  513.05   12.00
  -6  -8   6  491.65   12.30
   6  -8  -6  493.35   13.10
  -6  -6   8  471.85   12.40
  -6  -8   6  461.85   12.30
   8   6   6  516.65   13.30
  -6   6  -8  503.25   12.00
   6  -6  -8  501.65   12.00
   8  -6  -6  507.75   12.00
  -8   6  -6  511.35   12.40
   8   7  -6  293.07    8.50
  -7  -6  -8  284.37    8.70
  -7   6   8  280.97    7.50
  -6   8   7  276.67    7.90
   8  -7   6  282.87    7.70
   8  -7   6  295.87    8.70
   7  -6   8  278.47    7.50
  -6  -8  -7  278.87    8.50
  -8   7   6  283.77    7.70
   7   6  -8  286.27    7.50
   6  -8   7  278.67    7.20
   6  -8   7  295.67    8.70
   6   8  -7  281.07    8.00
   7  -6   8  275.97    8.50
  -8  -7  -6  290.07    8.60
   6   8  -7  280.57    7.90
   8   7  -6  269.87    7.60
   7   6  -8  293.27    8.40
   6  -8  -7  297.87    8.00
  -7   6  -8  286.77    7.70
   6   8   7  292.97    8.90
   7  -6  -8  285.17    8.70
   8  -7  -6  286.27    7.70
   8  -7  -6  302.87    8.90
  -6   8  -7  277.77    7.30
   6  -8  -7  274.37    8.60
  -7  -6   8  304.07    8.40
   8   7   6  284.87    8.80
   7   6   8  300.37    8.90
  -8  -7   6  290.67    7.70
  -8   7  -6  276.07    7.80
  -6  -8   7  295.37    7.90
  -7  -6   8  290.27    7.50
  -6  -8   7  292.17    8.10
   7  -6  -8  284.27    7.60
  -7  -8   0    1.10    1.90
   7   8   0    0.00    2.10
   8   0   7    1.20    2.40
  -7   8   0    0.10    1.90
   7  -8   0    0.00    1.90
   0  -7  -8    0.00    1.90
   8   0   7    0.00    1.90
  -8   0  -7    0.00    1.80
   0  -7  -8    0.00    2.00
   8   0  -7    0.00    2.00
   0  -7   8    4.30    2.00
   7  -8   0    0.00    1.80
   7   8  -1  122.09    5.20
   8  -1   7  110.89    4.70
   1  -7   8  112.59    4.60
  -7  -8  -1  119.19    4.90
   7  -8   1  124.79    5.00
   1   7  -8  109.89    3.40
  -7   8   1  108.69    4.90
   1   7  -8  111.79    4.80
  -8  -1  -7  108.39    5.10
   8  -1   7  119.89    5.40
   8   1  -7  117.69    5.30
  -1   7   8  117.49    5.00
  -1  -7  -8  111.29    4.90
  -1  -7  -8  119.09    5.10
   7  -8   1  115.49    4.50
   7   8  -1  117.79    4.70
  -1  -7   8  110.59    3.40
  -7  -8   1  121.49    4.70
   8   1   7  126.19    4.90
   1  -7  -8  121.89    4.70
  -7   8  -1  120.89    4.80
  -8   1  -7  116.59    4.90
   7  -8  -1  114.99    4.90
   1  -7  -8  114.69    5.10
   7   8   1  115.69    5.40
   8  -1  -7  118.99    5.20
  -1  -7   8  120.79    4.70
   7  -8  -1  115.39    4.80
   2   7  -8    0.00    1.90
   8  -2   7    5.70    2.40
   8   2  -7    0.90    2.20
   7  -8   2    0.00    1.70
  -8  -2  -7    0.00    2.20
   8  -2   7    2.10    1.80
  -2   7   8    0.00    1.70
  -2  -7  -8    2.40    2.10
   7   8  -2    2.60    2.10
   2  -7   8    1.40    2.10
   2   7  -8    1.30    1.30
  -7   8   2    2.00    1.90
   7   8  -2    0.00    1.80
  -7  -8  -2    1.30    2.00
   7  -8   2    2.20    2.10
   8   2   7    2.60    2.00
   7  -8  -2    2.10    1.90
  -2  -7   8    0.00    1.80
   8  -2  -7    2.60    2.20
   2  -7  -8    0.00    2.00
  -7   8  -2    0.00    1.70
   2  -7  -8    0.00    1.80
   7   8   2    2.70    2.20
   2   7   8    0.80    2.10
   7  -8  -2    0.10    1.80
  -7  -8   2    0.00    1.90
  -7  -8   2    0.00    1.70
  -2  -7   8    0.20    1.10
  -8   2  -7    0.50    1.80
  -8  -3  -7    3.90    2.40
  -3  -7  -8    9.80    2.30
  -3   7   8    5.30    1.80
   7   8  -3    8.30    2.00
   3  -7   8   11.90    2.30
   8   3  -7    6.90    2.30
  -7   8   3    9.40    2.00
  -7  -8  -3    7.90    2.20
   8  -3   7   10.70    1.90
   7  -8   3    8.70    1.80
   7  -8   3    6.20    2.30
   7   8  -3   12.60    2.30
   3   7  -8   11.60    1.60
   3   7  -8    9.00    2.00
  -8   3   7    7.50    1.20
   8   3  -7   11.10    1.10
   8  -3   7    7.50    2.40
  -3  -7   8   10.40    1.90
  -3  -7   8    4.90    1.40
   3  -7  -8    6.20    2.30
   8   3   7   10.10    2.30
   7   8   3    9.80    2.40
   8  -3  -7    8.30    2.30
   8  -3  -7    9.90    1.20
  -8  -3   7   12.30    1.10
   7  -8  -3   11.00    2.00
  -8   3  -7   11.90    2.00
   3  -7  -8    7.30    2.00
  -7  -8   3    4.40    2.00
  -7   8  -3    5.50    1.90
   3   7   8   11.30    2.40
   7  -8  -3    9.80    2.20
  -7  -8   3   10.20    1.90
   7  -8   4  284.97    7.70
  -7   8   4  300.07    8.10
   4  -7   8  277.77    6.80
   8   4  -7  288.57    8.50
  -8  -4  -7  284.97    8.70
   7  -8   4  288.77    8.50
   7   8  -4  295.27    8.40
  -8   4   7  275.07    7.10
  -7  -8  -4  283.37    8.30
   8   4  -7  287.07    7.10
   4   7  -8  284.27    7.90
   8  -4   7  281.67    7.80
  -4   7   8  274.47    7.80
   8  -4   7  292.37    8.60
  -4  -7  -8  302.37    8.60
   4   7  -8  276.97    7.70
   4  -7   8  279.27    8.50
   7   8  -4  273.37    8.00
  -8   4  -7  295.87    8.10
   4  -7  -8  281.47    7.90
   7   8   4  292.57    8.70
   8   4   7  307.17    8.90
   8  -4  -7  289.37    7.10
  -4   7  -8  274.87    6.90
   4  -7  -8  291.87    8.70
  -7  -8   4  280.27    7.90
  -7   8  -4  285.67    7.80
   7  -8  -4  298.67    8.00
  -8  -4   7  289.67    7.00
  -4  -7   8  265.37    7.60
  -7  -8   4  285.57    8.10
   4   7   8  312.57    8.90
   7  -8  -4  280.77    8.40
   8  -4  -7  296.37    8.60
  -4  -7   8  296.77    7.80
   8   5  -7  186.28    5.10
   7  -8   5  177.58    5.50
  -7   8   5  183.68    5.80
  -5  -7  -8  174.38    6.30
  -8  -5  -7  167.78    6.50
   8  -5   7  173.68    5.50
   5  -7   8  166.08    4.70
   5  -7   8  173.38    6.40
   5   7  -8  171.38    5.60
   5   7  -8  186.38    5.70
   8   5  -7  170.28    6.30
   7   8  -5  190.58    6.20
  -8   5   7  178.28    5.20
   8  -5   7  174.48    6.50
   7  -8   5  177.68    6.50
  -5   7   8  173.38    5.60
   7   8  -5  171.08    5.70
  -7  -8  -5  175.78    6.30
   7  -8  -5  180.48    6.40
   5  -7  -8  172.68    6.40
   7  -8  -5  188.78    5.90
  -7  -8   5  176.18    5.80
   8  -5  -7  189.08    6.50
   8  -5  -7  175.88    5.10
  -7   8  -5  178.28    5.50
  -5  -7   8  190.38    5.70
   5   7   8  183.38    6.70
  -5  -7   8  165.28    5.50
   8   5   7  174.98    6.50
  -5   7  -8  172.38    4.90
   5  -7  -8  185.08    5.80
  -8   5  -7  186.68    5.90
  -7  -8   5  176.18    6.00
   7   8   5  178.38    6.60
  -8  -5   7  181.08    5.00
  -6   7   8  270.17    7.60
  -8  -6  -7  274.67    8.70
   6   7  -8  287.77    7.70
  -7  -8  -6  290.47    8.70
   6  -7   8  274.77    7.20
   6  -7   8  275.67    8.50
   7  -8   6  291.77    7.50
   7  -8   6  292.07    8.70
   7   8  -6  294.67    8.30
   7   8  -6  277.67    7.80
   6   7  -8  271.17    8.00
  -8   6   7  286.17    7.50
  -7   8   6  291.17    8.00
   8  -6   7  272.97    7.60
   8  -6   7  285.37    8.70
   8   6  -7  279.97    8.40
   8   6  -7  277.67    7.40
  -6  -7  -8  282.17    8.70
   6  -7  -8  289.77    8.70
   6  -7  -8  283.87    7.70
   7  -8  -6  277.07    8.60
   7  -8  -6  288.17    7.90
   7   8   6  292.67    8.80
   8  -6  -7  297.67    8.70
   6   7   8  287.27    8.80
  -7  -8   6  272.97    8.00
  -7  -8   6  289.07    7.80
  -7   8  -6  278.07    7.60
   8  -6  -7  293.57    7.50
   8   6   7  285.67    8.80
  -6  -7   8  275.97    8.00
  -6  -7   8  297.37    7.70
  -6   7  -8  285.47    7.30
  -8  -6   7  290.57    7.40
  -8   6  -7  290.07    7.90
  -8  -7  -7   28.50    3.00
   8  -7   7   33.40    2.90
   8  -7   7   25.40    2.90
  -8   7   7   26.30    2.20
  -7  -8  -7   26.70    2.80
   7   7  -8   27.40    2.60
   7   7  -8   39.80    3.20
  -7  -7  -8   21.10    2.80
   7   8  -7   30.50    2.60
   7   8  -7   22.00    2.20
  -7   7   8   22.60    2.10
   8   7  -7   31.90    2.90
  -7   8   7   27.30    2.40
   7  -7   8   32.20    2.60
   7  -7   8   25.30    2.90
   7  -8   7   36.20    2.70
   7  -8   7   25.00    2.90
   8   7  -7   25.80    2.70
   7  -7  -8   24.10    2.20
   7  -8  -7   28.90    2.80
   7  -8  -7   25.30    2.30
  -7  -8   7   25.50    2.30
  -7  -8   7   24.10    2.30
   7  -7  -8   27.70    2.80
  -7  -7   8   26.20    2.40
  -7   7  -8   26.50    2.00
   7   8   7   28.50    3.00
   8  -7  -7   28.10    2.90
   8  -7  -7   37.80    2.90
  -8  -7   7   36.60    3.00
  -8   7  -7   26.90    2.20
   7   7   8   26.30    2.90
  -7   8  -7   33.50    2.90
   8   7   7   27.60    3.00
  -8  -8   0 3369.36   74.99
  -8   8   0 3400.36   75.79
   0  -8  -8 3511.85   76.29
   0  -8  -8 3401.16   75.09
   0  -8   8 3274.97   74.99
   8  -8   0 3366.16   75.69
   8  -8   0 3388.16   74.99
   8   0  -8 3534.85   76.09
   8   0   8 3399.26   75.79
   8   0   8 3285.07   75.39
   8   8   0 3365.06   76.09
  -8  -8  -1    0.80    2.00
   8   8  -1    0.00    2.10
  -8  -1  -8    0.00    2.30
   8  -1   8    0.00    2.30
   8   1  -8    0.20    2.10
  -1  -8  -8    0.00    2.00
  -1  -8  -8    0.00    2.00
   8  -1   8    1.40    1.80
   8  -8   1    0.00    2.00
   8  -8   1    2.10    1.90
   1   8  -8    0.00    1.00
   1  -8   8    0.00    2.00
   1  -8  -8    0.10    1.90
   8  -8  -1    0.00    1.80
   8  -8  -1    0.00    1.90
   1  -8  -8    0.00    2.00
  -1  -8   8    0.00    1.90
   8  -1  -8    0.00    2.10
  -1  -8   8    0.00    0.90
  -8   1  -8    0.00    1.80
  -8   8  -1    1.30    1.80
   8   1   8    2.60    2.00
  -8  -8   1    0.50    1.90
   8   8   1    0.00    2.20
  -8  -8  -2   22.40    2.50
   8   8  -2   18.30    2.60
  -8  -2  -8   19.80    2.80
   8  -2   8   18.20    2.80
   8   2  -8   18.70    2.60
  -2  -8  -8   24.60    2.70
   8  -2   8   23.70    2.30
   8   8  -2   21.30    2.20
   8  -8   2   19.10    2.60
   8  -8   2   23.30    2.30
   2  -8   8   18.50    2.60
   2   8  -8   21.10    1.60
   2   8   8   21.20    2.60
   8  -8  -2   25.60    2.60
   8  -8  -2   24.20    2.40
   2  -8  -8   20.20    2.40
   2  -8  -8   24.70    2.70
   8  -2  -8   21.80    2.70
  -2  -8   8   18.60    1.50
  -8   2  -8   25.00    2.30
  -8   8  -2   25.10    2.40
   8   2   8   24.00    2.60
  -8  -8   2   22.50    2.30
  -2  -8   8   24.60    2.40
   8   8   2   23.40    2.70
  -8  -8  -3    0.00    2.00
   3  -8   8    0.00    2.10
  -8  -3  -8    0.00    2.20
   8  -3   8    0.00    2.20
   8   3  -8    0.00    2.10
  -8   3   8    0.00    1.00
   8   8  -3    0.00    2.00
  -8   8   3    0.00    1.80
  -3  -8  -8    0.70    2.10
   8  -8   3    0.00    2.00
   3   8  -8    0.00    1.40
   8  -3   8    0.00    1.60
   8   8  -3    0.00    1.70
   8  -8   3    0.00    1.70
   3   8  -8    0.00    1.90
  -3  -8   8    1.30    1.80
   3   8   8    0.00    2.00
   8  -8  -3    0.40    2.00
   8  -8  -3    2.20    1.90
  -8  -8   3    0.00    1.80
  -3  -8   8    0.00    1.30
   8  -3  -8    0.00    2.10
   8  -3  -8    0.00    1.00
   3  -8  -8    0.00    2.00
  -8  -3   8    3.70    1.00
  -8   3  -8    0.20    1.70
   8   3   8    0.00    2.00
  -8   8  -3    0.00    1.70
   3  -8  -8    0.00    1.80
   8   8   3    0.00    2.10
  -8  -8  -4  479.35   12.40
   8   8  -4  489.25   12.50
  -8  -4  -8  476.35   12.70
   8  -4   8  465.35   11.80
   8  -4   8  467.55   12.50
  -8   4   8  479.35   11.10
   8   4  -8  480.25   11.10
  -8   8   4  484.65   12.00
  -4  -8  -8  475.65   12.50
   8   8  -4  479.15   11.90
   8   4  -8  482.55   12.40
  -4   8   8  474.65   11.90
   8  -8   4  474.25   11.90
   8  -8   4  460.55   12.40
   4  -8   8  452.85   12.40
   4   8  -8  472.85   11.70
   4   8  -8  476.25   12.00
   4   8   8  481.65   12.80
   8  -8  -4  473.85   12.50
   8  -8  -4  491.05   11.90
   4  -8  -8  490.65   12.70
   4  -8  -8  488.35   12.10
   8  -4  -8  470.45   12.70
   8  -4  -8  468.35   11.10
  -8  -4   8  486.35   11.10
  -8   4  -8  508.15   12.10
  -4  -8   8  486.75   12.00
  -8   8  -4  476.75   11.90
   8   4   8  484.05   12.70
  -8  -8   4  467.45   11.90
  -4  -8   8  454.25   11.60
   8   8   4  491.45   12.90
  -8  -8  -5    1.80    2.20
   8  -8   5    2.70    2.20
  -8  -5  -8    0.00    2.20
   8   8  -5    0.00    1.60
   8  -5   8    0.50    1.60
  -8   5   8    0.00    1.30
   8   5  -8    0.00    2.10
  -8   8   5    1.10    1.80
  -5  -8  -8    2.70    2.20
   8   8  -5    0.00    2.10
   8  -5   8    0.70    2.30
   5   8  -8    3.30    1.90
  -5   8   8    0.00    1.70
   8  -8   5    0.00    1.60
   8   5  -8    1.50    1.40
   5  -8   8    3.00    2.20
   5   8  -8    0.90    1.80
  -5   8  -8    0.50    1.10
   5   8   8    1.40    2.20
   8  -8  -5    0.00    2.00
   5  -8  -8    0.00    1.80
   5  -8  -8    0.00    2.00
  -8  -8   5    0.00    1.80
   8  -5  -8    0.80    2.10
   8  -5  -8    0.00    1.30
  -8   5  -8    0.10    1.70
  -5  -8   8    2.90    1.80
  -8   8  -5    0.00    1.70
   8  -8  -5    0.40    1.80
   8   5   8    0.70    2.20
  -5  -8   8    0.00    1.60
  -8  -5   8    0.60    1.30
   8   8   5    0.00    2.20
  -8  -8  -6  489.65   13.00
   8   6  -8  491.65   11.80
  -8  -6  -8  487.65   13.00
   8   8  -6  481.25   12.70
   8   8  -6  480.35   12.10
  -8   6   8  493.25   11.80
   8  -6   8  476.75   12.90
  -8   8   6  504.55   12.20
  -6  -8  -8  480.25   12.90
   6   8  -8  480.45   12.30
   8  -6   8  475.15   12.00
   8  -8   6  503.75   13.00
  -6   8   8  478.95   12.10
   6  -8   8  462.65   12.80
   8  -8   6  495.55   12.10
   6  -8   8  486.25   11.60
   6   8  -8  492.95   12.20
   8   6  -8  484.55   12.70
   6  -8  -8  488.45   13.10
   6   8   8  492.85   13.20
  -6  -8   8  489.55   12.30
   8  -8  -6  494.25   12.10
   6  -8  -8  505.55   12.20
  -6   8  -8  482.95   11.70
   8  -6  -8  503.65   13.20
   8  -6  -8  488.35   11.80
  -6  -8   8  493.35   12.10
  -8   8  -6  500.95   12.20
   8  -8  -6  506.85   13.20
  -8  -8   6  502.65   12.20
   8   6   8  523.45   13.40
  -8  -6   8  497.55   11.70
  -8   6  -8  509.15   12.20
   8   8   6  498.55   13.30
  -8  -8  -7    0.10    2.20
   8   7  -8    1.20    1.50
  -8  -7  -8    0.00    2.20
   8   8  -7    0.00    2.10
   8   8  -7    0.00    1.70
  -8   7   8    0.00    1.60
   8  -7   8    0.00    2.20
  -8   8   7    1.40    1.80
  -7  -8  -8    1.90    2.20
   7   8  -8    0.10    2.00
   8  -7   8    1.70    1.50
   8  -8   7    0.70    2.20
  -7   8   8    0.00    1.60
   7  -8   8    0.00    2.10
   8  -8   7    0.00    1.50
   7  -8   8    1.60    1.40
   7   8  -8    0.00    1.70
   8   7  -8    0.80    2.10
   7  -8  -8    0.00    2.10
   7   8   8    0.80    2.30
  -7  -8   8    0.00    1.70
   8  -8  -7    0.10    1.70
   7  -8  -8    0.00    1.70
  -7   8  -8    0.00    1.40
   8  -7  -8    0.00    2.10
   8  -7  -8    0.00    1.60
  -7  -8   8    1.00    1.70
  -8   8  -7    2.10    1.60
   8  -8  -7    2.50    2.20
  -8  -8   7    0.00    1.70
   8   7   8    0.60    2.30
  -8  -7   8    0.00    1.60
  -8   7  -8    0.00    1.60
   8   8   7    0.00    2.20
  -8  -8  -8  805.22   20.40
   8   8  -8  833.82   19.50
   8   8  -8  857.21   20.20
  -8   8   8  839.32   19.50
   8  -8   8  795.82   20.40
   8  -8   8  834.72   19.40
   8  -8  -8  849.32   19.50
   8  -8  -8  859.61   20.80
  -8   8  -8  821.92   19.50
  -8  -8   8  853.61   19.50
   8   8   8  841.92   20.80
  -9   0   0    1.10    1.90
   0  -9   0    0.00    1.90
   0   0  -9    0.00    1.60
   0   0   9    0.60    1.50
   0   0   9    0.00    1.80
   0   0   9    0.00    1.60
   0   9   0    0.00    1.60
   0   9   0    0.60    1.50
   9   0   0    1.40    2.00
   9   0   0    0.50    1.70
   9   0   0    2.30    1.60
   1   0   9   42.20    3.10
   1   0   9   45.40    3.50
   1   0   9   46.40    3.30
   9  -1   0   50.19    3.80
   9  -1   0   42.30    3.20
   9   1   0   49.20    3.90
   9   1   0   45.70    3.10
   0   9  -1   43.60    3.10
   0   9  -1   46.20    3.00
   0   9   1   51.19    3.60
   0   9   1   42.60    3.20
   1   0  -9   40.40    3.30
  -1   0   9   42.90    3.30
  -1   0   9   49.20    3.30
   0  -9  -1   42.20    3.50
   0  -9   1   43.50    3.60
  -1   0  -9   45.60    3.40
  -1   0   9   43.10    3.20
  -9   1   0   49.99    4.20
  -9  -1   0   39.70    3.10
  -9  -2   0    0.00    1.70
   9   2   0    0.00    2.00
   9  -2   0    1.30    2.00
   9  -2   0    0.00    1.70
  -2   0   9    1.90    1.50
   0  -9  -2    0.00    1.90
   0  -9   2    0.00    1.90
   2   0   9    0.00    1.80
   9   2   0    0.00    1.60
   0   9  -2    0.50    1.40
   0   9  -2    0.00    1.40
   0   9   2    0.00    1.70
   2   0  -9    0.00    1.60
   2   0   9    0.00    1.60
   2   0   9    0.00    1.50
   2   0   9    1.20    2.10
  -9   2   0    0.00    1.90
  -9   2   0    0.30    1.80
  -2   0   9    0.00    1.60
  -2   0   9    1.70    1.70
   3   0   9  948.61   23.70
   3   0   9 1036.90   23.70
   9  -3   0 1072.09   24.10
   0   9   3 1036.70   23.90
   3   0  -9 1025.70   23.80
   3   0   9 1019.50   23.70
   3   0   9 1061.69   23.70
   0  -9   3 1033.30   23.70
   9  -3   0 1033.10   23.40
   9   3   0 1049.20   24.20
   9   3   0 1036.10   23.30
   0  -9  -3  984.40   23.70
  -3   0   9 1007.80   23.10
  -3   0   9  991.30   23.00
   0  -9  -3 1027.30   23.90
   0   9  -3 1013.20   23.20
  -9  -3   0 1050.89   23.40
   0   9  -3  964.30   23.10
  -9   3   0 1081.49   24.20
  -9   3   0 1022.00   23.40
  -3   0   9  975.30   23.70
  -4   0   9    0.00    1.70
   9  -4   0    0.60    1.80
  -9  -4   0    0.00    1.70
  -4   0   9    0.10    1.40
  -9   4   0    0.00    1.90
  -4   0  -9    0.00    1.70
   9   4   0    0.90    2.20
   9   4   0    0.00    1.70
  -4   0   9    0.80    1.40
   0  -9  -4    0.00    1.90
   0  -9  -4    0.90    2.00
   0  -9   4    0.00    1.90
   0   9  -4    0.30    1.20
   4   0  -9    0.00    1.90
   4   0   9    0.00    1.60
   4   0   9    0.00    2.20
   9  -4   0    0.00    1.90
  -9   4   0    0.40    1.90
   0  -9  -5  884.41   20.90
   5   0  -9  862.61   20.60
  -5   0   9  831.12   20.50
  -5   0   9  853.21   19.50
  -5   0   9  840.12   19.40
  -9   5   0  870.81   20.30
   0   9  -5  830.12   19.50
   9   5   0  867.61   20.20
   9  -5   0  854.01   20.10
   9   5   0  888.31   21.00
  -9   5   0  912.91   20.80
   9  -5   0  895.41   20.70
   0  -9  -5  857.61   20.50
   0  -9   5  870.91   20.50
   5   0   9  875.91   20.40
  -9  -5   0  861.91   20.20
  -5   0  -9  878.31   20.50
   5   0   9  886.91   20.80
   0  -9   6    0.60    2.00
   0  -9  -6    0.00    2.00
   9   6   0    1.10    1.80
   6   0   9    0.00    1.70
   6   0   9    0.00    2.30
  -6   0  -9    0.60    1.70
   9  -6   0    0.00    1.80
   9   6   0    0.00    2.20
   6   0  -9    0.30    2.00
   9  -6   0    0.00    1.90
  -9  -6   0    0.00    1.80
  -6   0   9    0.10    1.00
   0  -9  -6    0.00    2.00
   0   9  -6    0.00    1.00
  -9   6   0    0.00    1.80
  -6   0   9    0.00    1.10
   0  -9  -7   45.90    4.00
   9  -7   0   46.70    3.90
   7   0  -9   55.29    4.20
   9   7   0   48.60    4.50
  -9  -7   0   47.60    3.70
  -7   0  -9   53.69    3.90
   7   0   9   47.50    4.20
   0  -9  -7   52.39    4.00
   7   0   9   51.49    3.80
   9  -7   0   46.80    3.80
   0  -9   7   50.79    3.90
   9  -8   0    1.00    1.90
   8   0  -9    0.00    2.00
   0  -9   8    0.60    2.00
   9   8   0    0.00    2.20
  -9  -8   0    0.30    2.00
   8   0   9    0.00    1.80
   0  -9  -8    0.00    2.00
   0  -9  -8    0.50    2.00
   9  -8   0    0.90    2.00
   8   0   9    1.70    2.40
  -1   9   0   42.90    3.20
   0   1  -9   47.20    3.10
   9   0   1   43.60    3.50
   9   0  -1   42.30    3.10
   0  -1   9   43.10    3.40
   0  -1  -9   49.20    3.40
   0   1   9   43.50    3.30
   9   0  -1   40.70    3.10
   9   0   1   44.40    3.50
   9   0   1   47.80    3.80
   9   0  -1   42.60    3.80
   0   1   9   45.40    3.50
   1   9   0   50.69    3.50
   0  -1  -9   50.09    3.50
  -9   0  -1   49.60    4.30
  -1  -9   0   50.19    4.00
   0  -1   9   46.00    3.30
   1  -9   1    0.00    1.90
  -1  -1  -9    0.40    1.90
  -9  -1  -1    0.00    1.70
  -1   1   9    0.00    1.50
  -1   1   9    0.00    1.60
   1   9  -1    0.00    1.90
   9  -1   1    0.00    1.90
   9  -1   1    0.00    1.80
  -1  -1  -9    0.00    1.60
   1  -1   9    2.60    1.50
  -1   9   1    0.00    1.60
  -9   1   1    0.00    1.80
   1   1  -9    0.00    1.60
   1   9  -1    0.00    1.50
   9   1  -1    0.00    2.00
   9   1  -1    0.00    1.50
  -1  -9  -1    0.00    1.90
   1  -1   9    0.00    1.90
   1  -9   1    0.50    1.40
   1  -1   9    0.00    1.60
  -1   1  -9    0.00    1.50
  -9   1  -1    0.70    1.90
   1  -1  -9    0.00    1.70
   1   9   1    0.00    1.60
   1  -9  -1    0.00    1.90
   1   1   9    0.00    1.50
   9  -1  -1    0.00    1.60
  -1  -1   9    0.00    1.40
  -9  -1   1    0.00    1.50
  -1  -1   9    0.00    1.50
   9   1   1    0.00    1.70
  -1  -9   1    0.10    1.90
   9  -1  -1    0.00    2.00
  -1   9  -1    0.00    1.40
   1   1   9    0.00    1.70
   1   9   1    0.00    1.70
   1  -1  -9    0.00    1.70
   9   1   1    0.00    1.90
   1  -9  -1    0.00    1.60
  -1  -1   9    0.00    1.70
  -9  -2  -1   73.09    3.80
  -9   2   1   74.09    3.70
   2   1  -9   75.09    3.70
   9   2  -1   75.69    3.50
   9  -2   1   76.79    4.20
   9  -2   1   72.89    3.70
   1   9  -2   72.49    3.40
  -9   2   1   83.69    4.40
  -1   9   2   90.59    4.10
   2  -1   9   80.69    3.80
   9   2  -1   81.19    4.40
  -2  -1  -9   78.79    4.20
   9  -2  -1   81.29    4.30
   1   9   2   79.99    4.20
   1   9   2   84.79    4.40
   2   1   9   72.59    4.00
  -9  -2   1   75.59    3.60
  -9   2  -1   82.29    4.30
   2  -1  -9   78.09    3.80
   2  -1  -9   79.19    3.70
   2   1   9   87.39    3.90
   2   1   9   78.79    4.10
   9  -2  -1   74.79    3.50
  -9   2  -1   70.89    3.80
  -1   9  -2   74.39    3.20
   9   2   1   82.49    4.30
   9   2   1   79.39    4.00
  -2  -1   9   74.49    3.40
   1  -9   3  328.27    9.10
  -9  -3  -1  333.67    8.80
  -9   3   1  344.47    8.70
  -3  -1  -9  343.97    9.30
   9   3  -1  342.37    9.40
  -1   9   3  333.37    9.10
   9  -3   1  356.56    9.40
  -3   1   9  337.77    8.40
   9   3  -1  337.27    8.60
   3  -1   9  343.17    9.40
   3  -1   9  340.47    9.30
   3   1  -9  350.56    9.00
   3  -1   9  330.07    8.80
   3  -1   9  341.47    8.80
   1   9  -3  312.07    8.40
  -1  -9  -3  339.27    9.30
   9  -3   1  341.47    8.90
  -3   1   9  346.57    9.20
  -1   9  -3  329.07    8.30
  -3  -1   9  336.87    8.50
   1  -9  -3  334.17    9.20
  -3  -1   9  331.37    8.90
   3  -1  -9  347.47    8.50
   3   1   9  339.37    9.10
   1   9   3  338.57    9.40
   1   9   3  336.07    9.20
   3  -1  -9  349.87    9.20
  -9   3  -1  342.87    9.00
  -3  -1   9  331.37    8.40
  -1  -9   3  325.47    9.10
   3   1   9  346.97    9.20
  -1  -9   3  308.67    8.30
   9  -3  -1  333.07    8.60
  -1   9  -3  323.57    8.20
  -9  -3   1  343.27    8.60
  -9   3  -1  349.27    9.40
   9   3   1  333.77    9.40
   1  -9  -3  338.17    9.20
   3   1   9  332.87    8.90
   9   3   1  350.76    9.00
   9  -3  -1  348.27    9.40
   9  -4   1  160.08    5.40
   4   1  -9  157.28    5.40
   9   4  -1  142.49    5.70
   9   4  -1  148.09    4.90
   1  -9   4  145.49    5.40
  -9  -4  -1  152.68    5.20
  -4   1   9  152.38    5.40
  -1   9   4  152.98    5.50
  -4   1   9  150.58    4.50
  -4  -1  -9  153.38    5.50
   1   9  -4  146.49    4.50
   9  -4   1  158.78    5.60
  -4  -1  -9  148.89    5.80
  -9   4   1  155.68    5.10
   4  -1   9  161.48    5.80
   4  -1   9  149.69    5.10
  -1  -9  -4  157.38    5.80
  -1   9  -4  144.09    4.30
  -4  -1   9  149.99    5.20
  -9   4  -1  145.79    5.30
   1  -9  -4  146.79    5.40
   1  -9  -4  161.48    5.60
   9  -4  -1  160.38    5.80
  -1  -9   4  153.88    5.50
   1   9   4  148.59    6.00
   9   4   1  152.18    5.20
   4  -1  -9  153.58    4.60
   9   4   1  154.18    5.80
   4  -1  -9  157.98    5.40
  -1  -9   4  143.69    4.40
   4   1   9  147.49    5.40
  -9   4  -1  157.48    5.50
  -1   9  -4  146.99    4.20
  -4  -1   9  151.78    4.50
  -9  -4   1  155.98    5.10
   9  -4  -1  149.99    4.90
  -4   1  -9  149.99    5.10
  -4  -1   9  148.29    4.50
   1  -9   5  333.27    9.00
  -5  -1  -9  342.07    9.10
   9  -5   1  327.17    9.00
  -5   1   9  323.27    7.80
   9  -5   1  330.57    8.80
   9   5  -1  321.37    9.20
  -9   5   1  320.67    8.50
  -9  -5  -1  322.97    8.80
  -1  -9  -5  321.57    8.90
   5   1  -9  313.97    8.70
  -5  -1  -9  332.07    9.30
   5  -1   9  320.67    9.10
   9   5  -1  319.87    8.40
   1   9  -5  314.47    7.90
   5  -1   9  324.27    8.60
  -1  -9   5  313.47    8.80
  -5  -1   9  313.47    7.80
  -5  -1   9  300.57    7.70
  -1   9  -5  308.37    7.60
   5  -1  -9  316.37    8.90
   5   1   9  331.67    8.90
  -1  -9   5  301.87    7.80
   9   5   1  326.97    8.80
   1  -9  -5  311.57    8.70
  -9  -5   1  317.97    8.40
   9  -5  -1  335.67    9.10
   1   9   5  335.17    9.40
  -5  -1   9  325.17    8.90
   9  -5  -1  328.57    8.50
   1  -9  -5  321.37    9.00
  -1   9  -5  307.27    7.60
   5  -1  -9  309.97    7.80
  -9   5  -1  319.67    8.80
  -9   5  -1  326.77    8.90
  -5   1  -9  328.37    8.70
   9   5   1  331.07    9.30
   6  -1   9   59.59    3.70
   9  -6   1   53.29    3.70
   9  -6   1   59.39    3.80
  -6   1   9   59.49    2.40
   1   9  -6   57.49    2.60
  -9   6   1   60.99    3.70
   9   6  -1   56.19    4.50
  -1  -9  -6   57.39    4.10
   6  -1   9   61.89    4.80
   6   1  -9   55.49    4.10
  -6  -1  -9   56.09    4.00
  -9  -6  -1   54.69    3.70
   9   6  -1   54.09    3.60
  -6  -1  -9   51.39    4.10
   1  -9   6   56.19    3.80
  -6  -1   9   55.39    2.40
   6  -1  -9   56.69    4.00
   6  -1  -9   59.59    2.50
   1  -9  -6   61.99    4.40
  -6   1  -9   60.49    4.00
   9   6   1   55.49    3.80
   9  -6  -1   64.99    3.70
   6   1   9   59.39    4.00
   9  -6  -1   63.59    4.20
  -1  -9   6   60.89    3.90
   1  -9  -6   57.59    4.00
   9   6   1   66.29    4.40
  -1  -9   6   52.29    2.50
  -6  -1   9   57.99    2.40
  -9   6  -1   57.49    4.10
  -9  -6   1   58.79    3.50
   1  -9   7    3.50    2.10
  -1  -9  -7    3.50    2.10
   7   1  -9    4.00    2.10
  -9   7   1    2.40    1.90
  -7  -1  -9    0.00    2.30
  -9  -7  -1    1.50    2.00
   9  -7   1    3.80    2.10
   7  -1   9    2.50    1.70
   7  -1   9    2.10    2.40
   9   7  -1    1.50    1.80
   9  -7   1    2.30    1.90
   9   7  -1    1.10    2.30
   1   9  -7    1.90    1.10
  -9  -7   1    4.60    1.90
   7  -1  -9    0.00    2.10
  -7   1  -9    3.20    1.90
   1  -9  -7    1.60    2.00
  -9   7  -1    4.00    2.00
  -1  -9   7    3.10    1.00
   1  -9  -7    1.20    2.00
   9   7   1    2.60    2.20
  -1  -9   7    2.20    2.00
   9  -7  -1    2.20    2.00
   7   1   9    3.00    1.90
   9  -7  -1    3.70    1.90
   1   9  -8    1.70    1.10
  -9  -8  -1    1.80    2.00
   9  -8   1    0.50    1.90
   8  -1   9    3.60    2.40
   8   1  -9    3.50    2.20
   9  -8   1    4.10    2.10
   9   8  -1    2.90    2.30
  -8  -1  -9    3.00    2.40
  -1  -9  -8    8.40    2.20
   8  -1   9    4.90    1.90
   1  -9   8    3.10    2.10
   8   1   9    3.50    2.00
   1  -9  -8    3.10    2.10
   8  -1  -9    3.50    2.20
   9  -8  -1    5.00    2.00
   9  -8  -1    2.40    1.90
   9   8   1    1.60    2.30
  -1  -9   8    5.10    2.00
   1  -9  -8    3.80    2.10
  -9  -8   1    2.70    1.90
   0  -2  -9    0.00    1.80
   0   2  -9    0.00    1.80
   9   0  -2    0.60    2.00
   0   2   9    0.00    1.70
  -9   0  -2    0.20    1.80
  -2  -9   0    0.10    1.90
   2  -9   0    0.00    1.90
   9   0   2    0.50    2.00
   9   0  -2    2.10    1.50
  -2   9   0    0.00    1.50
  -2  -9   0    1.10    1.50
   0   2   9    0.40    1.70
   2  -9   0    0.00    1.50
   0   2  -9    1.30    1.50
   9   0  -2    0.80    1.40
   0  -2  -9    0.00    1.80
   9   0   2    0.30    1.80
   2   9   0    0.50    1.70
   9   0   2    0.00    1.90
   0  -2   9    0.00    1.40
   0  -2   9    0.70    1.70
   9   1  -2   77.39    4.30
   1   2  -9   72.39    3.80
  -9  -1  -2   75.09    4.00
  -2   9   1   81.19    4.00
   2   9  -1   81.19    4.30
  -1  -2  -9   76.29    4.00
   1   2  -9   74.99    3.50
   2   9  -1   79.99    3.90
   9   1  -2   74.19    3.30
   1  -2   9   78.79    3.60
  -1  -2  -9   80.79    3.90
  -1   2   9   79.69    4.20
   9  -1   2   74.19    4.00
  -1   2   9   74.09    3.60
   2   9   1   85.19    4.10
  -1   2  -9   81.39    3.60
   9   1   2   76.19    4.30
   9  -1  -2   79.79    4.60
   9   1   2   75.29    3.90
  -1   2  -9   83.19    4.40
   1  -2  -9   82.49    3.90
  -9  -1   2   73.99    3.20
   1  -2  -9   72.49    3.70
   9  -1  -2   74.99    3.20
  -2   9  -1   79.99    3.50
   1   2   9   78.89    3.90
  -9   1  -2   78.09    4.30
  -2   9   2    0.00    1.70
   2   2  -9    0.90    1.70
  -9  -2  -2    0.00    1.90
  -2   2   9    0.00    1.70
   2  -2   9    1.30    1.50
  -2   2   9    0.00    1.60
   2   9  -2    0.30    1.90
   2  -2   9    0.00    1.40
   9   2  -2    0.70    1.40
   9  -2   2    0.00    1.90
  -2  -9  -2    0.00    1.60
  -2  -9  -2    0.00    1.90
   2  -2   9    0.00    2.00
  -2  -2  -9    0.00    2.00
   9  -2   2    0.70    1.90
   2  -9   2    0.00    1.90
   2   9  -2    0.00    1.60
   2   2  -9    0.00    1.60
   2  -9   2    0.00    1.40
   9   2  -2    0.00    2.10
  -9   2   2    0.00    1.50
  -2   9  -2    0.00    1.30
  -2   2  -9    0.00    2.00
  -9   2  -2    0.00    2.00
   2   2   9    0.00    1.60
   2  -9  -2    1.80    2.00
   2  -2  -9    0.00    1.90
   2   2   9    0.20    1.80
  -2  -9   2    0.30    1.40
  -2  -9   2    0.00    1.90
   9  -2  -2    0.00    1.50
  -2  -2   9    0.00    1.40
   2   9   2    0.90    1.90
   2   2   9    0.00    1.80
   2  -9  -2    0.10    1.70
  -9  -2   2    0.00    1.50
  -9   2  -2    0.00    1.80
  -2  -2   9    0.00    1.60
   9  -2  -2    1.40    2.00
   9   2   2    0.00    1.80
   9   2   2    0.60    2.10
   2  -2  -9    2.10    1.70
   3  -2   9   24.30    2.70
   2   9  -3   36.60    2.90
   3  -2   9   30.90    2.70
   2  -9   3   27.40    2.30
  -9  -3  -2   27.50    2.50
   9  -3   2   31.00    2.60
   9  -3   2   28.90    2.50
   9   3  -2   27.70    2.70
  -3   2   9   25.40    2.00
  -2  -9  -3   29.00    2.60
   2   9  -3   29.70    2.60
  -3  -2  -9   26.60    2.70
   9   3  -2   26.80    2.00
   3  -2   9   33.10    2.80
   2  -9   3   25.90    2.60
  -9   3   2   30.70    2.10
  -3   2   9   29.10    2.50
  -2   9   3   25.60    2.40
   3   2  -9   27.00    2.30
   3   2  -9   28.10    2.10
   3   2   9   37.80    3.40
  -3   2  -9   25.30    2.60
  -9  -3   2   31.70    2.80
   3   2   9   30.40    2.40
  -3  -2   9   28.30    2.20
  -2  -9   3   27.80    2.50
  -9   3  -2   30.60    2.60
   9  -3  -2   34.00    2.80
   9  -3  -2   30.60    2.70
  -2   9  -3   33.20    2.40
   9   3   2   27.80    2.70
  -2  -9   3   30.20    2.80
   3  -2  -9   31.20    2.60
   3  -2  -9   31.10    2.70
   9   3   2   28.50    2.50
   2  -9  -3   28.70    2.40
  -9   3  -2   32.70    2.60
   2  -9  -3   27.50    2.60
   2   9   3   26.50    2.60
  -3  -2   9   27.00    2.00
  -9   4   2  734.53   16.80
  -4  -2  -9  720.63   17.40
   2  -9   4  705.13   16.40
  -9  -4  -2  732.93   17.20
   9   4  -2  730.23   17.70
   9   4  -2  716.43   16.70
  -4   2   9  726.43   16.50
  -4  -2  -9  740.63   17.50
   2  -9   4  672.53   17.20
   4   2  -9  729.73   17.20
   4  -2   9  740.53   17.60
  -2  -9  -4  718.83   17.40
   9  -4   2  733.43   17.40
   4   2  -9  716.73   16.50
   9  -4   2  735.73   17.20
   4  -2   9  726.33   17.00
   2   9  -4  708.73   16.70
   9   4   2  742.23   17.20
   4   2   9  724.23   17.40
  -2   9  -4  688.83   16.40
   2  -9  -4  724.63   17.50
  -9  -4   2  732.73   16.70
   9   4   2  721.53   17.70
  -9   4  -2  722.23   17.40
  -4  -2   9  695.13   17.10
  -4  -2   9  713.13   16.50
   2   9   4  736.23   17.70
   9  -4  -2  739.33   17.60
   2  -9  -4  739.23   17.30
  -9   4  -2  725.63   17.20
  -2  -9   4  697.63   16.60
  -2  -9   4  687.43   17.20
   9  -4  -2  734.43   16.70
  -4   2  -9  721.33   17.00
   4  -2  -9  710.73   16.50
   4  -2  -9  721.33   17.50
  -9   5   2    3.60    1.80
  -5   2   9    3.60    1.30
   5  -2   9    0.70    2.30
   5  -2   9    2.10    1.60
  -5  -2  -9    2.00    2.30
   9   5  -2    4.40    2.30
  -2  -9  -5    2.80    2.20
   2  -9   5    2.40    2.10
   5   2  -9    2.90    2.00
  -9  -5  -2    2.20    2.00
   9   5  -2    2.70    1.70
   9  -5   2    2.40    2.00
   9  -5   2    2.40    2.10
   5   2  -9    4.00    1.40
   2   9  -5    2.00    1.50
   2   9   5    0.40    2.10
  -2  -9   5    4.40    2.10
  -2  -9   5    3.00    1.20
   9  -5  -2    1.10    2.10
  -5  -2   9    1.40    1.30
   5  -2  -9    3.40    2.00
   2  -9  -5    0.00    2.00
   5   2   9    4.10    2.00
   9   5   2    1.70    1.90
   9  -5  -2    3.40    1.80
  -2   9  -5    1.70    1.00
  -9  -5   2    4.60    1.80
  -9   5  -2    0.00    1.90
   9   5   2    2.00    2.30
   5  -2  -9    2.20    1.40
   2  -9  -5    5.20    2.00
  -5   2  -9    2.80    1.70
  -5  -2   9    2.10    1.80
   6  -2   9  323.37    8.50
   9  -6   2  326.37    8.90
  -6   2   9  321.37    7.70
  -6  -2  -9  309.17    9.20
   6   2  -9  322.77    8.90
  -2  -9  -6  309.97    8.90
   2  -9   6  314.17    9.00
  -9  -6  -2  318.27    8.80
   2   9  -6  310.57    7.90
   6  -2   9  315.27    9.20
   9   6  -2  330.77    9.40
   9   6  -2  317.07    8.50
   6   2  -9  315.07    7.70
   9  -6   2  324.37    8.90
  -9   6   2  330.27    8.60
   6  -2  -9  319.77    7.70
   2   9   6  306.17    9.30
  -6  -2   9  314.37    7.60
   9   6   2  329.47    9.40
   6  -2  -9  332.47    9.30
  -2  -9   6  309.37    8.80
   6   2   9  319.97    8.90
   9  -6  -2  322.77    9.20
  -2  -9   6  306.37    7.90
  -9  -6   2  322.07    8.40
  -9   6  -2  329.07    9.00
   2  -9  -6  319.37    8.90
   2  -9  -6  328.47    9.30
  -6  -2   9  331.87    9.00
  -6   2  -9  324.57    8.70
   9  -6  -2  340.57    8.60
   9   7  -2  214.28    6.40
   2  -9   7  214.28    6.90
  -7   2   9  212.68    5.30
  -2  -9  -7  213.18    6.90
   2   9  -7  199.28    5.60
  -9  -7  -2  209.08    6.70
   9  -7   2  218.18    6.60
   7  -2   9  203.58    6.30
   7  -2   9  215.88    7.10
  -9   7   2  216.88    6.50
  -7  -2  -9  214.88    7.20
   9   7  -2  212.48    7.00
   7   2  -9  205.28    6.90
   7   2  -9  206.28    5.30
   9  -7   2  205.68    6.80
   2   9   7  216.58    7.50
  -2  -9   7  190.18    5.50
   9  -7  -2  217.98    6.40
  -9  -7   2  209.98    6.40
   9  -7  -2  217.68    7.00
  -2  -9   7  209.08    6.50
   2  -9  -7  211.48    6.70
  -7  -2   9  215.28    5.20
   7  -2  -9  207.58    5.30
  -9   7  -2  218.88    6.70
   9   7   2  216.48    7.30
   7   2   9  223.68    7.00
  -7   2  -9  218.88    6.70
   7  -2  -9  220.48    7.00
   2  -9  -7  221.08    7.10
   9  -8   2   19.60    2.60
  -9  -8  -2   20.20    2.50
   8  -2   9   21.30    2.80
   2   9  -8   16.00    1.60
   8  -2   9   20.00    2.20
   9  -8   2   21.20    2.30
   2  -9   8   19.10    2.60
   8   2  -9   22.80    2.70
  -2  -9  -8   23.10    2.70
   9   8  -2   20.00    2.70
  -8  -2  -9   19.60    2.80
  -2  -9   8   16.50    1.40
   9  -8  -2   20.80    2.50
   8   2   9   18.70    2.50
  -9  -8   2   15.90    2.20
   2   9   8   20.20    2.80
   9   8   2   19.40    2.80
  -9   8  -2   19.90    2.30
  -2  -9   8   19.20    2.40
   9  -8  -2   22.10    2.30
   8  -2  -9   21.10    2.70
   2  -9  -8   21.30    2.50
   2  -9  -8   21.30    2.70
  -8   2  -9   20.00    2.20
   0   3   9 1029.80   23.40
   0  -3   9  992.30   23.40
   0   3  -9 1035.30   23.20
   9   0  -3 1035.90   24.10
   0   3   9 1019.90   23.90
   3  -9   0 1038.80   23.50
   0   3  -9  988.60   23.40
   3   9   0 1039.60   23.70
  -9   0  -3 1053.09   24.00
  -3  -9   0  995.90   23.60
  -3  -9   0  987.30   23.60
  -3   9   0 1005.50   23.40
   0  -3  -9 1018.30   23.90
   0  -3  -9 1042.80   23.50
   9   0  -3  996.40   22.70
   3  -9   0  995.10   23.60
   9   0  -3 1017.00   22.70
   9   0   3 1031.30   23.60
   9   0   3 1032.50   23.60
   9   0   3 1017.80   23.90
   0  -3   9 1012.40   23.20
   3  -9   1  345.57    8.60
   1   3  -9  329.47    8.80
   3   9  -1  345.27    9.00
   9  -1   3  338.87    9.20
   1   3  -9  326.77    8.50
  -9  -1  -3  341.27    9.10
   1  -3   9  343.37    9.10
  -1   3   9  353.56    9.20
   1  -3   9  331.17    8.40
  -3  -9  -1  337.07    9.10
  -3  -9  -1  332.87    9.10
  -1   3   9  350.86    8.80
   3  -9   1  327.97    9.10
  -3   9   1  318.57    8.80
  -1  -3  -9  333.97    9.00
   9  -1   3  355.96    9.40
   9   1  -3  337.47    9.40
   9   1  -3  339.17    8.20
  -1  -3  -9  349.47    9.40
  -3  -9   1  338.67    9.10
  -1  -3   9  332.47    8.70
   1  -3  -9  347.47    8.80
  -1  -3   9  331.17    8.50
  -1   3  -9  339.17    9.10
   3   9   1  320.37    9.00
   9  -1  -3  335.77    9.40
   9   1   3  336.67    9.10
   9   1   3  337.67    9.30
   1   3   9  339.97    9.00
  -1   3  -9  327.47    8.40
   3  -9  -1  342.67    9.10
   9  -1  -3  328.07    8.10
  -3   9  -1  327.57    8.60
   1  -3  -9  336.37    9.20
   3  -9  -1  331.67    8.90
  -9  -1   3  338.57    8.20
  -9   1  -3  349.07    9.30
  -3  -9   1  323.37    8.80
   1   3   9  338.67    9.20
   9   2  -3   30.30    2.80
   9  -2   3   33.20    2.70
  -3   9   2   25.50    2.30
  -3  -9  -2   26.60    2.60
  -9  -2  -3   28.80    2.60
  -2   3   9   28.20    2.20
   2  -3   9   33.70    2.70
   2  -3   9   31.50    2.70
   2   3  -9   27.10    2.10
  -9   2   3   27.70    1.90
   3   9  -2   24.20    2.20
   3  -9   2   28.10    2.60
   3  -9   2   28.50    2.60
   2   3  -9   36.50    3.20
  -3  -9  -2   28.60    2.40
  -2  -3  -9   27.20    2.60
   3   9  -2   29.20    2.50
   2  -3   9   30.80    2.80
   9  -2   3   23.20    2.60
   9   2  -3   30.10    2.50
  -9  -2   3   28.20    2.40
  -2   3  -9   27.20    2.60
   2  -3  -9   29.20    2.60
  -3   9  -2   23.80    1.90
   2   3   9   25.80    2.50
   3  -9  -2   23.40    2.30
   3  -9  -2   29.80    2.60
   9  -2  -3   30.70    2.80
  -3  -9   2   37.80    3.20
  -2  -3   9   32.10    2.80
   3   9   2   29.20    2.60
   9   2   3   29.30    2.70
  -3  -9   2   30.90    2.60
   9  -2  -3   34.20    2.50
   2   3   9   29.80    2.60
   2   3   9   26.40    2.40
  -2  -3   9   33.00    2.90
  -9   2  -3   26.80    2.70
   2  -3  -9   28.20    2.30
   9   2   3   25.60    2.50
  -9   2  -3   30.10    2.60
  -9   3   3    1.40    1.50
   3   9  -3    0.00    1.90
   9  -3   3    0.50    2.10
   3   3  -9    0.00    1.60
  -3   9   3    0.00    1.80
  -3  -9  -3    1.60    2.00
   3  -3   9    0.00    1.30
   3  -3   9    0.00    2.10
  -9  -3  -3    3.40    2.10
   3   3  -9    0.00    1.60
   9   3  -3    0.00    1.30
  -3   3   9    0.30    1.50
  -3  -3  -9    0.00    2.00
   3  -9   3    0.00    1.30
   3  -9   3    0.00    2.00
   3  -3   9    0.00    1.30
   9  -3   3    0.20    1.90
   9   3  -3    0.50    2.10
   3   9  -3    0.00    1.70
   9   3   3    0.00    2.10
  -3  -3   9    0.20    1.50
   3  -3  -9    0.00    1.90
  -3  -3   9    0.00    1.50
  -9   3  -3    0.00    2.10
  -3   9  -3    0.00    1.30
   3  -9  -3    0.00    1.90
  -9   3  -3    0.00    1.90
  -3  -9   3    0.00    1.90
   3  -9  -3    0.00    1.90
  -9  -3   3    0.00    1.40
   9  -3  -3    0.00    2.00
   9  -3  -3    2.20    1.40
   3   9   3    2.10    2.00
   3   3   9    2.40    2.00
   3  -3  -9    0.00    1.60
  -3  -9   3    0.90    1.40
   9   3   3    0.00    1.90
   4   3  -9   23.90    2.00
   3   9  -4   35.10    3.00
   4   3  -9   21.30    2.20
   9  -4   3   24.40    2.40
   4  -3   9   23.00    2.70
   9   4  -3   27.70    2.80
   9   4  -3   22.70    1.90
  -4  -3  -9   24.10    2.70
  -9  -4  -3   21.60    2.50
   3  -9   4   25.10    2.20
   3  -9   4   19.80    2.50
  -9   4   3   27.30    2.10
   3   9  -4   25.20    2.40
  -4   3   9   23.00    1.80
  -3  -9  -4   22.60    2.50
   9  -4   3   21.40    2.50
   4  -3   9   24.20    1.90
   4  -3  -9   23.00    1.90
   9  -4  -3   27.10    2.70
  -4   3  -9   24.40    1.90
  -9   4  -3   27.60    2.50
  -9  -4   3   22.30    1.90
  -4  -3   9   24.00    2.10
  -4  -3   9   24.30    1.90
   9   4   3   25.20    2.80
   3   9   4   22.00    2.60
   4  -3  -9   23.50    2.60
  -3   9  -4   27.90    2.30
   3  -9  -4   24.30    2.50
   3  -9  -4   25.90    2.50
   9  -4  -3   33.70    2.80
   4   3   9   24.60    2.50
   3   9  -5  113.29    4.30
  -9   5   3  123.69    4.30
   3  -9   5  114.29    3.40
   3  -9   5  109.79    5.00
   9   5  -3  122.29    5.20
   5  -3   9  119.09    4.30
  -5   3   9  115.39    3.90
   9  -5   3  122.49    5.00
  -5  -3  -9  116.09    5.40
   5   3  -9  117.09    3.90
   9   5  -3  118.69    4.30
   5  -3   9  120.59    5.50
   5   3  -9  114.29    4.90
  -9  -5  -3  124.79    4.90
  -3  -9  -5  119.49    5.20
   9  -5   3  112.69    4.90
  -3  -9   5  117.99    4.90
  -9   5  -3  119.19    4.90
  -3  -9   5  111.59    4.10
  -5  -3   9  108.19    4.70
  -5  -3   9  118.89    3.80
  -3   9  -5  109.19    3.40
   9   5   3  119.39    5.40
  -9  -5   3  110.79    4.20
   9  -5  -3  124.39    4.30
  -5   3  -9  120.99    4.50
   9  -5  -3  131.49    5.50
   3  -9  -5  111.39    5.20
   3  -9  -5  119.89    4.90
   5  -3  -9  113.69    3.90
   3   9   5  119.59    5.30
   5  -3  -9  128.49    5.30
   5   3   9  121.49    5.10
  -3  -9  -6   51.79    3.90
  -9   6   3   55.29    3.60
   6   3  -9   51.79    2.70
   6  -3   9   48.70    4.00
   6  -3   9   52.59    3.20
   9   6  -3   44.20    3.30
   9  -6   3   47.90    3.90
   9   6  -3   53.29    4.30
   6   3  -9   52.39    3.80
  -6  -3  -9   45.10    3.40
   3   9  -6   49.10    3.00
   9  -6   3   43.50    3.80
  -6   3   9   49.10    2.60
   3  -9   6   49.60    4.10
  -9  -6  -3   56.09    4.00
   6  -3  -9   48.10    2.60
   3  -9  -6   48.70    4.00
  -6  -3   9   50.69    2.50
  -6   3  -9   53.09    3.50
   9  -6  -3   53.39    3.30
  -3  -9   6   52.19    2.90
   6  -3  -9   60.19    4.10
  -9   6  -3   54.39    4.10
  -3  -9   6   55.99    3.60
   6   3   9   53.09    4.00
   9  -6  -3   50.69    4.00
  -9  -6   3   48.50    3.30
   9   6   3   47.50    4.30
   3   9   6   53.79    4.40
  -6  -3   9   41.90    3.60
   3  -9  -6   44.80    3.80
   7   3  -9    4.40    1.20
   9   7  -3    4.90    2.30
   9  -7   3    2.30    1.90
   9  -7   3    5.10    2.20
   3   9  -7    4.10    1.50
  -9   7   3    1.50    1.80
   7  -3   9    4.80    2.40
  -9  -7  -3    4.70    2.10
   7  -3   9    2.00    1.60
   9   7  -3    6.60    1.80
   3  -9   7    4.10    2.20
   7   3  -9    2.30    2.10
  -7  -3  -9    1.80    2.40
  -3  -9  -7    6.50    2.20
  -7   3   9    5.70    1.20
   3  -9  -7    2.60    2.10
  -3  -9   7   10.00    2.10
   3   9   7    4.70    2.30
   7  -3  -9    5.50    2.20
   9   7   3    2.40    2.30
   7  -3  -9    6.20    1.30
  -7   3  -9    5.80    1.80
   7   3   9    3.10    2.10
   9  -7  -3    6.20    1.90
  -3  -9   7    4.60    1.30
  -9   7  -3    5.50    2.00
  -7  -3   9    4.60    1.10
  -9  -7   3    2.10    1.80
   9  -7  -3    4.60    2.20
   3  -9  -7    4.70    2.10
  -9  -8  -3  166.98    6.00
  -3  -9  -8  175.58    6.40
  -8  -3  -9  180.98    6.60
   3   9  -8  165.68    5.10
   8   3  -9  182.48    6.30
   8   3  -9  174.78    4.60
   9   8  -3  171.08    5.70
  -9   8   3  179.78    5.80
   8  -3   9  175.28    6.60
  -8   3   9  176.88    4.60
   9   8  -3  180.28    6.40
   9  -8   3  173.18    5.80
   9  -8   3  177.08    6.30
   3  -9   8  169.58    6.40
   8  -3   9  163.18    5.50
   8   3   9  174.78    6.30
  -9   8  -3  179.08    6.00
  -8  -3   9  175.68    4.50
   3  -9  -8  183.68    6.60
   9   8   3  178.28    6.60
   3   9   8  176.08    6.70
   8  -3  -9  173.28    6.40
  -9  -8   3  169.18    5.70
   9  -8  -3  169.58    6.20
  -3  -9   8  180.68    5.90
   9  -8  -3  173.98    5.80
   8  -3  -9  180.68    4.70
   3  -9  -8  180.18    6.10
  -8   3  -9  171.38    5.90
  -3  -9   8  170.08    5.00
   9   0   4    0.00    1.90
  -4   9   0    0.00    1.60
   9   0   4    0.00    1.90
   9   0   4    0.00    2.10
  -4  -9   0    0.90    1.70
   4  -9   0    0.00    2.00
   0   4  -9    0.00    1.30
   9   0  -4    0.70    2.00
  -9   0  -4    0.00    1.80
   0  -4   9    0.00    1.80
   4   9   0    0.00    1.90
   0  -4   9    0.70    1.30
  -4  -9   0    1.40    2.00
   9   0  -4    0.00    1.10
   0  -4  -9    0.10    1.90
   0   4   9    0.00    1.70
   0  -4  -9    0.00    1.90
   9   0  -4    0.00    1.10
   0   4  -9    0.00    1.90
   4  -9   0    0.90    1.70
  -4  -9  -1  145.89    5.60
   4  -9   1  148.19    5.40
   9  -1   4  148.99    5.60
   9   1  -4  149.39    4.20
   1  -4   9  160.08    4.50
   9  -1   4  162.88    5.80
  -1  -4  -9  163.78    5.70
   9   1  -4  150.08    5.80
   9  -1   4  156.68    5.70
   4   9  -1  159.08    5.50
   1   4  -9  143.99    4.60
   1   4  -9  151.18    5.40
   1  -4   9  146.39    5.30
  -4   9   1  163.88    5.50
  -1   4   9  155.88    5.10
   4  -9   1  151.98    5.00
  -4  -9  -1  161.28    5.60
  -1  -4  -9  154.28    5.60
  -9  -1  -4  151.38    5.50
  -1  -4   9  154.08    4.60
   9  -1  -4  155.98    4.20
  -9   1  -4  152.98    5.60
   1   4   9  157.88    5.40
   9  -1  -4  150.48    5.70
  -1  -4   9  155.38    5.10
   1  -4  -9  163.18    5.80
  -1   4  -9  153.08    5.50
   1  -4  -9  152.68    5.20
   9   1   4  156.78    5.70
   4  -9  -1  158.58    5.70
  -1   4  -9  150.08    4.50
   4  -9  -1  155.28    5.30
   4   9   1  151.08    5.70
  -4  -9   1  146.89    5.40
  -4  -9   1  143.09    5.20
  -4   9  -1  151.68    5.00
   9   1   4  155.38    5.70
   9  -2   4  702.83   17.30
   4  -9   2  694.73   17.30
   2  -4   9  728.63   17.30
  -9  -2  -4  734.43   17.40
   9   2  -4  732.43   17.70
   2  -4   9  725.03   16.50
  -9   2   4  740.73   16.30
  -4  -9  -2  731.63   17.50
  -2  -4  -9  736.23   17.40
   2   4  -9  735.53   17.00
   4   9  -2  723.83   17.20
  -2   4   9  717.23   16.80
   4  -9   2  723.73   16.80
   2   4  -9  694.23   16.70
  -4   9   2  731.83   17.30
   9  -2   4  714.33   17.40
   2  -4   9  707.83   16.60
   9   2  -4  712.73   16.20
  -4  -9  -2  739.83   17.50
   4  -9  -2  694.63   17.20
  -4  -9   2  698.13   17.20
   4   9   2  695.33   17.40
   9  -2  -4  722.83   17.70
   9   2   4  755.42   17.80
   2  -4  -9  719.93   16.90
  -2  -4   9  702.13   16.80
   9  -2  -4  741.03   16.30
   2   4   9  727.63   17.70
   2  -4  -9  736.13   17.60
  -9  -2   4  723.63   16.30
  -4  -9   2  683.43   17.00
  -2  -4   9  716.83   16.80
   4  -9  -2  729.73   17.20
  -9   2  -4  758.92   17.60
  -4   9  -2  699.93   16.80
   4   9  -3   23.30    2.40
   4  -9   3   22.10    2.60
   9   3  -4   24.50    2.70
   4  -9   3   20.00    1.70
   3   4  -9   22.80    2.10
  -9  -3  -4   25.00    2.60
  -3   4   9   24.70    2.00
   3  -4   9   22.60    2.60
  -4  -9  -3   23.60    2.60
   9   3  -4   23.20    1.70
  -3  -4  -9   21.70    2.60
   9  -3   4   19.70    2.50
   3   4  -9   23.70    2.10
  -4   9   3   22.80    2.40
   9  -3   4   28.50    2.50
   4   9  -3   25.20    2.30
  -9   3   4   31.60    2.60
   3  -4   9   21.50    1.70
   3  -4   9   22.10    1.70
   4   9   3   25.20    2.60
   9  -3  -4   26.60    2.70
  -3  -4   9   31.50    2.80
   4  -9  -3   24.70    2.50
  -9   3  -4   25.90    2.40
  -4  -9   3   24.00    2.50
   4  -9  -3   28.60    2.50
  -4  -9   3   22.60    2.00
  -3  -4   9   24.10    2.00
   9  -3  -4   29.30    2.30
  -4   9  -3   29.20    2.60
   3  -4  -9   24.10    2.60
   3  -4  -9   22.10    2.10
   9   3   4   21.80    2.70
  -9  -3   4   22.10    1.70
   3   4   9   22.60    2.60
  -4   4   9    0.00    1.50
   4  -9   4    0.00    1.20
   9  -4   4    1.70    2.20
  -9  -4  -4    0.70    2.20
   4   9  -4    0.00    1.90
   9   4  -4    0.00    2.20
   4  -9   4    0.00    2.10
   9  -4   4    2.40    1.90
   4   9  -4    2.20    1.80
   4  -4   9    0.00    1.30
   4  -4   9    0.40    2.20
  -9   4   4    0.00    1.40
   4   4  -9    0.00    1.60
   9   4  -4    0.00    1.40
  -4  -9  -4    0.00    2.10
   4   4  -9    0.00    1.80
  -4  -4  -9    1.70    2.20
  -4  -9   4    0.10    1.90
   4  -4  -9    0.00    1.60
   4   4   9    0.00    2.00
  -4   4  -9    0.00    1.30
   4   9   4    0.80    2.10
  -4   9  -4    0.00    1.30
   4  -4  -9    0.00    2.00
   4  -9  -4    4.40    2.00
  -9  -4   4    0.00    1.40
   9  -4  -4    1.70    1.50
   4  -9  -4    0.00    1.90
  -4  -4   9    0.00    1.60
  -4  -9   4    0.60    1.50
  -4  -4   9    0.20    1.50
   9   4   4    0.00    2.20
   9  -4  -4    2.30    2.10
  -9   4  -4    0.00    1.90
   4  -9   5   75.39    2.90
  -9   5   4   79.69    3.70
   9  -5   4   78.29    4.10
   5  -4   9   74.49    3.50
  -5  -4  -9   76.19    4.70
   5  -4   9   78.39    4.50
   9  -5   4   82.89    4.70
  -9  -5  -4   83.59    4.60
   5   4  -9   83.39    3.60
   9   5  -4   73.19    3.50
  -5   4   9   78.19    3.40
   4  -9   5   72.39    4.40
   4   9  -5   79.39    3.90
   4   9  -5   83.09    4.30
   9   5  -4   90.39    4.90
   5   4  -9   74.49    4.00
  -4  -9  -5   92.09    4.50
   9   5   4   84.29    4.80
   4   9   5   87.49    4.80
   5  -4  -9   82.99    4.60
  -9  -5   4   80.49    3.50
  -4  -9   5   94.99    4.40
   9  -5  -4   86.69    3.70
   9  -5  -4   89.89    4.70
  -5   4  -9   80.59    3.80
  -9   5  -4   84.79    4.50
   5   4   9   82.99    4.60
  -4   9  -5   74.79    3.00
  -5  -4   9   73.09    4.10
   4  -9  -5   71.29    4.40
   4  -9  -5   80.99    4.20
   5  -4  -9   70.59    3.40
  -4  -9   5   74.09    3.70
  -5  -4   9   87.99    3.30
   9  -6   4  333.27    9.30
  -9   6   4  337.47    8.50
  -4  -9  -6  333.17    9.40
   4   9  -6  323.07    8.50
   4  -9   6  313.67    7.70
   4  -9   6  327.47    9.20
   9   6  -4  319.37    8.40
   6  -4   9  342.57    9.60
   6   4  -9  329.97    9.00
   6   4  -9  331.77    8.10
  -6  -4  -9  319.67    9.30
   9  -6   4  336.27    8.90
  -9  -6  -4  332.97    9.30
  -6   4   9  320.17    8.00
   9   6  -4  334.97    9.40
   6  -4   9  319.67    8.40
   4   9   6  326.67    9.50
   6   4   9  336.77    9.60
  -4  -9   6  325.67    8.80
   4  -9  -6  331.87    9.00
  -9   6  -4  321.37    8.90
  -4   9  -6  310.47    7.80
   6  -4  -9  329.37    9.40
   9  -6  -4  331.07    8.40
  -6  -4   9  320.27    8.00
  -6   4  -9  328.57    8.60
   9  -6  -4  334.17    9.40
  -9  -6   4  315.07    8.30
   9   6   4  326.87    9.60
   6  -4  -9  317.17    8.10
  -6  -4   9  314.77    8.90
  -4  -9   6  312.37    8.30
   4  -9  -6  323.67    9.30
  -9   7   4  246.18    7.00
  -4  -9  -7  236.08    7.60
   4   9  -7  240.28    6.80
   9  -7   4  245.18    7.10
   9  -7   4  241.48    7.60
   7  -4   9  229.28    6.70
  -9  -7  -4  250.27    7.70
   7   4  -9  242.18    7.40
   7   4  -9  250.07    6.30
   9   7  -4  233.08    6.90
   4  -9   7  231.48    7.40
   7  -4   9  249.08    7.90
  -7  -4  -9  243.48    7.90
   9   7  -4  247.78    7.70
  -7   4   9  236.88    6.20
   7  -4  -9  248.38    6.40
  -9   7  -4  246.08    7.30
   7  -4  -9  240.98    7.70
   4  -9  -7  237.48    7.20
  -7  -4   9  240.58    6.20
  -7   4  -9  245.88    7.00
   9  -7  -4  249.58    6.90
   9   7   4  253.07    8.10
   9  -7  -4  253.57    7.90
  -4  -9   7  242.68    7.10
  -4  -9   7  231.38    6.60
  -9  -7   4  240.18    6.80
   4  -9  -7  245.18    7.70
   4   9   7  235.68    7.90
   7   4   9  245.18    7.80
  -8  -4  -9   27.70    3.00
   8   4  -9   29.30    2.30
   9  -8   4   29.00    2.90
   4   9  -8   29.20    2.20
   8  -4   9   32.50    2.30
  -8   4   9   24.60    2.30
   8   4  -9   32.50    2.90
  -9   8   4   30.60    2.50
  -9  -8  -4   27.50    2.80
   9   8  -4   29.30    2.90
   9  -8   4   30.90    2.50
   4  -9   8   31.30    3.00
  -4  -9  -8   35.00    3.10
   8  -4   9   31.20    3.10
   9   8  -4   27.30    2.30
   9   8   4   28.60    3.00
  -9   8  -4   32.80    2.50
   4  -9  -8   29.80    2.60
   9  -8  -4   32.00    2.90
  -8  -4   9   35.80    2.20
   9  -8  -4   37.20    3.30
   8  -4  -9   30.30    2.30
   8   4   9   31.80    3.00
   4   9   8   29.30    3.00
   8  -4  -9   29.80    3.00
  -9  -8   4   29.90    2.50
  -4  -9   8   35.10    2.70
   4  -9  -8   30.90    3.00
  -8   4  -9   30.30    2.40
  -4  -9   8   27.90    2.00
   5  -9   0  847.62   20.10
   5  -9   0  885.61   20.40
   0  -5  -9  870.01   20.70
  -5   9   0  875.41   20.20
   0  -5   9  857.81   20.10
   0  -5  -9  855.71   20.20
   0   5   9  864.01   20.20
   9   0  -5  876.91   20.80
  -5  -9   0  864.41   20.40
   0   5  -9  845.72   20.20
   0  -5   9  862.21   19.50
   9   0   5  897.91   20.60
   0   5  -9  826.22   19.50
  -5  -9   0  875.51   20.50
   5   9   0  817.32   20.40
   9   0   5  872.11   20.60
  -1  -5  -9  318.87    8.80
   1   5  -9  306.27    7.90
  -1  -5  -9  325.47    9.20
   5  -9   1  322.27    8.40
   5  -9   1  315.27    8.80
   9   1  -5  332.77    9.30
  -1   5   9  317.07    8.50
  -5  -9  -1  318.37    8.90
   9  -1   5  306.97    8.90
   9  -1   5  336.17    9.00
  -5   9   1  316.87    8.70
   1  -5   9  313.17    7.70
   1   5  -9  317.37    8.70
   1  -5   9  326.67    8.80
  -9  -1  -5  318.67    8.90
   5   9  -1  322.37    8.90
  -5  -9   1  324.17    8.90
  -1  -5   9  323.17    8.60
   1  -5  -9  326.77    9.10
   9   1   5  327.57    9.00
   9  -1  -5  320.47    7.40
   1  -5  -9  319.47    8.60
  -9   1  -5  333.17    9.10
   5  -9  -1  320.57    8.80
   9  -1  -5  325.07    9.20
  -1  -5   9  313.37    7.90
  -1   5  -9  308.77    7.80
   5   9   1  313.77    8.90
  -5  -9   1  313.37    8.80
   5  -9  -1  331.67    8.70
  -1   5  -9  319.47    8.90
  -5   9  -1  313.17    8.40
  -2  -5  -9    3.60    2.10
   5  -9   2    5.10    1.60
  -9   2   5    3.50    1.20
   2  -5   9    4.00    1.10
   5  -9   2    0.40    2.10
   2  -5   9    2.20    2.10
  -9  -2  -5    0.60    2.20
   9  -2   5    1.50    2.30
   9   2  -5    3.30    2.20
  -2   5   9    3.20    1.70
  -5  -9  -2    3.80    2.10
   5   9  -2    1.50    2.00
   9   2  -5    3.10    1.00
   9  -2   5    3.70    2.00
   2   5  -9    4.90    1.90
   2  -5   9    3.90    1.10
   2   5  -9    3.60    1.50
  -5   9   2    3.90    1.90
   2  -5  -9    3.50    1.90
   5   9   2    3.80    2.20
   5  -9  -2    2.50    1.90
   5  -9  -2    7.20    2.10
   2   5   9    0.70    2.10
  -5  -9   2    3.60    2.00
  -9  -2   5    2.50    1.10
  -5  -9   2    1.40    1.70
  -2  -5   9    2.90    1.80
   9  -2  -5    1.00    2.10
  -5   9  -2    3.40    1.60
   9  -2  -5    3.90    1.10
  -2  -5   9    3.40    1.40
  -9   2  -5    2.70    2.00
   9   2   5    3.50    2.20
   2  -5  -9    2.50    2.10
   9  -3   5  128.79    4.80
   3  -5   9  114.19    3.70
   9   3  -5  120.59    5.20
  -3  -5  -9  120.69    5.20
   3   5  -9  114.49    4.50
   3   5  -9  111.69    4.20
   3  -5   9  114.89    3.70
   5   9  -3  111.29    4.80
  -9  -3  -5  112.89    4.90
   3  -5   9  115.19    5.00
   5  -9   3  115.29    5.10
  -9   3   5  123.59    3.70
  -5  -9  -3  106.79    4.90
   5   9  -3  115.39    4.80
   9   3  -5  112.39    3.60
   5  -9   3  116.19    4.10
  -3   5   9  112.99    4.40
   9  -3   5  121.39    5.40
   5   9   3  121.29    5.50
   9   3   5  114.69    5.30
   3  -5  -9  115.49    5.10
  -5  -9   3  120.89    4.60
  -5  -9   3  123.59    4.90
   3  -5  -9  108.29    4.50
   5  -9  -3  122.39    4.90
   9  -3  -5  118.09    3.60
  -3  -5   9  112.99    4.20
  -3  -5   9  118.39    4.20
   3   5   9  124.39    5.60
  -9  -3   5  116.09    3.60
  -5   9  -3  106.69    4.20
   9  -3  -5  126.79    5.30
  -9   3  -5  134.69    5.30
   5  -9  -3  122.99    5.00
   9  -4   5   81.49    4.40
   5   9  -4   88.19    4.50
   5   9  -4   82.59    4.20
  -4   5   9   77.19    3.70
   5  -9   4   78.29    4.60
  -9  -4  -5   76.49    4.70
  -4  -5  -9   88.99    4.80
   4  -5   9   78.49    3.10
   9  -4   5   91.69    4.30
  -9   4   5   84.49    3.30
   5  -9   4   74.69    3.40
  -5  -9  -4   80.69    4.70
   9   4  -5   77.69    3.20
   4   5  -9   76.99    3.80
   4  -5   9   86.69    4.90
   4   5  -9   74.19    3.90
   9   4  -5   84.39    4.60
   5  -9  -4   90.19    4.30
  -9  -4   5   78.19    3.10
  -5  -9   4   81.09    4.00
  -5  -9   4   78.39    4.20
   4  -5  -9   75.89    3.80
   9  -4  -5   86.89    3.30
   5  -9  -4   77.49    4.30
  -9   4  -5   93.39    4.60
   4   5   9   83.79    4.70
   5   9   4   87.89    5.10
  -4  -5   9   74.69    3.90
   9   4   5   81.19    5.10
   4  -5  -9   84.49    4.70
  -4  -5   9   80.69    3.50
  -4   5  -9   76.39    3.30
   9  -4  -5   88.99    4.70
  -5   9  -4   70.99    3.40
   5  -5   9    3.10    2.20
   5   5  -9    0.00    1.60
   9   5  -5    0.00    1.40
  -5  -5  -9    0.00    2.20
   5   9  -5    0.00    1.90
   5   5  -9    0.00    1.90
  -9  -5  -5    0.00    2.20
   5  -9   5    0.00    2.10
   9  -5   5    3.00    2.30
   9  -5   5    1.40    1.80
   5  -5   9    0.60    1.30
   9   5  -5    0.70    2.20
  -9   5   5    0.00    1.50
  -5  -9  -5    0.00    2.20
   5  -9   5    0.00    1.20
  -5   5   9    0.00    1.40
   5   9  -5    4.10    1.90
   5  -5  -9    0.10    2.10
   5  -5  -9    0.00    1.60
  -5  -5   9    0.00    1.50
   5   5   9    0.70    2.10
   9  -5  -5    0.00    1.50
   5  -9  -5    0.00    1.90
  -5  -9   5    0.90    2.00
   9   5   5    0.00    2.20
  -5  -5   9    0.00    1.60
   5  -9  -5    0.30    2.00
  -5  -9   5    0.00    1.60
  -9  -5   5    0.00    1.40
   9  -5  -5    0.40    2.10
  -5   5  -9    0.00    1.40
  -5   9  -5    0.00    1.40
   5   9   5    0.00    2.20
  -9   5  -5    0.00    1.80
  -5  -9  -6  129.89    5.30
   9   6  -5  130.19    5.30
   5   9  -6  130.59    5.10
   6   5  -9  121.89    4.90
   6  -5   9  120.89    5.30
  -6   5   9  121.09    4.20
   9   6  -5  119.59    4.40
   9  -6   5  125.39    4.80
   9  -6   5  140.99    5.50
  -9   6   5  129.89    4.50
  -6  -5  -9  126.69    5.30
   6  -5   9  121.29    4.20
  -9  -6  -5  122.39    5.30
   6   5  -9  128.39    4.30
   5  -9   6  127.79    5.60
   5   9  -6  120.29    4.60
   5  -9   6  116.99    3.80
  -5   9  -6  118.49    3.90
  -6   5  -9  123.09    4.40
   5  -9  -6  122.49    5.60
   9  -6  -5  133.49    4.50
  -6  -5   9  120.59    5.00
  -6  -5   9  131.59    4.20
   5  -9  -6  129.49    5.10
   9  -6  -5  136.99    5.80
   6  -5  -9  125.39    4.30
   5   9   6  132.19    5.70
  -9  -6   5  122.79    4.40
  -9   6  -5  132.09    5.10
  -5  -9   6  125.79    4.60
   6  -5  -9  129.79    5.50
   6   5   9  137.39    6.00
  -5  -9   6  129.69    4.80
   9   6   5  123.79    5.70
   7   5  -9  123.09    4.20
  -7  -5  -9  116.79    5.30
   7  -5   9  131.49    5.90
  -9   7   5  126.79    4.70
  -9  -7  -5  135.19    5.60
   9   7  -5  127.49    5.20
   5   9  -7  119.99    4.70
   9   7  -5  129.59    4.70
   9  -7   5  137.79    5.60
   7   5  -9  126.89    5.30
   5  -9   7  127.29    5.60
  -5  -9  -7  126.39    5.60
   9  -7   5  134.69    4.80
   5  -9   7  125.39    3.70
   7  -5   9  124.89    4.50
  -7   5   9  122.09    4.20
   5   9   7  136.79    5.70
   9  -7  -5  138.39    5.80
   9  -7  -5  130.99    4.60
  -5  -9   7  126.99    4.70
   9   7   5  133.09    6.00
  -5  -9   7  131.09    5.00
   5  -9  -7  124.29    5.40
  -5   9  -7  122.69    3.80
   5  -9  -7  130.19    5.00
  -9   7  -5  129.79    5.10
  -7  -5   9  132.09    4.10
  -7   5  -9  130.99    4.60
   7  -5  -9  142.39    5.70
  -9  -7   5  129.09    4.70
   7  -5  -9  127.39    4.30
   7   5   9  140.99    5.90
  -9  -8  -5    1.60    2.20
   8   5  -9    0.00    2.10
  -9   8   5    4.80    1.80
   9   8  -5    3.20    2.30
   9   8  -5    2.80    1.70
   5  -9   8    3.20    2.30
   8  -5   9    0.50    1.50
   5  -9   8    4.20    1.00
   8  -5   9    3.60    2.40
   8   5  -9    3.50    1.40
   9  -8   5    1.20    1.80
   9  -8   5    3.10    2.20
   5   9  -8    0.00    1.80
  -5  -9  -8    0.80    2.20
  -8   5   9    0.80    1.30
  -8  -5  -9    4.80    2.40
  -5   9  -8    4.10    1.10
  -9  -8   5    0.00    1.70
   9  -8  -5    2.20    2.10
   8  -5  -9    1.50    2.20
   9  -8  -5    4.00    1.80
  -5  -9   8    5.70    2.00
   8   5   9    3.70    2.30
   5  -9  -8    0.30    2.10
   5  -9  -8    1.00    1.90
  -9   8  -5    1.50    1.80
   9   8   5    1.80    2.30
  -5  -9   8    2.30    1.60
  -8  -5   9    5.80    1.40
  -8   5  -9    3.30    1.70
   5   9   8    2.40    2.30
   8  -5  -9    2.80    1.40
   0  -6   9    0.00    1.80
   0  -6  -9    0.00    1.90
   0  -6   9    1.30    1.00
   9   0  -6    0.00    2.10
  -6   9   0    0.00    1.80
   6  -9   0    0.00    1.70
   6  -9   0    0.00    1.90
   0   6  -9    0.00    1.10
   9   0   6    0.00    1.90
  -6  -9   0    0.00    2.00
   9   0   6    0.00    2.40
   0  -6  -9    0.00    1.90
   6   9   0    0.00    2.10
   1   6  -9   59.79    4.10
   1  -6   9   56.59    3.90
  -1   6   9   58.29    3.60
   1  -6   9   55.19    2.30
   6   9  -1   62.49    4.20
   6  -9   1   59.49    3.60
   6  -9   1   62.89    4.00
   9  -1   6   56.99    3.70
  -1  -6  -9   61.89    4.20
  -6  -9  -1   49.90    3.70
  -6   9   1   52.49    4.00
  -1  -6  -9   51.29    3.90
   9   1  -6   50.89    4.10
   1   6  -9   59.89    2.70
   9  -1   6   59.09    4.10
  -9  -1  -6   51.29    4.00
   1  -6  -9   57.59    4.10
   6   9   1   59.69    4.30
  -6  -9   1   55.89    3.90
  -1   6  -9   53.69    2.30
  -6  -9   1   58.99    4.00
  -1  -6   9   62.19    3.50
   9  -1  -6   55.69    4.10
   1  -6  -9   54.79    3.70
  -1  -6   9   63.69    2.70
   9   1   6   63.29    4.10
   6  -9  -1   64.19    3.90
  -6   9  -1   57.59    3.60
  -9   1  -6   65.39    4.20
   6  -9  -1   59.49    3.80
   2   6  -9  314.97    8.10
   9   2  -6  316.37    9.20
   9  -2   6  323.37    8.90
   9  -2   6  326.27    9.30
  -2   6   9  316.07    8.60
   2  -6   9  319.07    7.60
  -2  -6  -9  327.77    9.10
   2  -6   9  307.17    7.60
  -9  -2  -6  303.97    9.00
   6  -9   2  336.07    9.20
   6  -9   2  327.87    8.50
  -6  -9  -2  320.27    9.00
   6   9  -2  317.57    9.00
   2  -6   9  321.17    9.00
   2   6  -9  313.97    8.70
  -6  -9   2  321.97    8.90
   9   2   6  338.27    9.40
   2  -6  -9  330.47    9.40
   6  -9  -2  322.97    8.90
   2  -6  -9  329.47    8.70
  -6  -9   2  321.07    8.80
  -9   2  -6  331.07    9.00
   6   9   2  327.97    9.40
   6  -9  -2  327.67    8.80
   2   6   9  326.97    9.40
   9  -2  -6  331.77    9.40
  -6   9  -2  310.17    8.50
  -2  -6   9  314.17    8.00
  -2  -6   9  322.77    8.60
  -3   6   9   43.40    3.40
   6   9  -3   55.09    3.90
   9  -3   6   63.29    3.70
  -6  -9  -3   47.40    4.10
  -9   3   6   54.19    2.40
   3   6  -9   49.99    3.50
   6  -9   3   46.70    3.30
   3  -6   9   51.09    2.30
   9  -3   6   54.99    3.90
   9   3  -6   51.69    4.00
   3  -6   9   48.40    2.30
   6  -9   3   51.79    3.20
   3  -6   9   44.50    3.30
  -3  -6  -9   50.89    4.10
   9   3  -6   49.00    2.30
  -9  -3  -6   45.90    4.00
   3   6  -9   50.79    3.10
   6  -9  -3   54.29    4.00
   3   6   9   51.99    4.20
  -6  -9   3   50.09    3.70
   6  -9  -3   55.59    3.80
  -9   3  -6   56.89    3.90
   3  -6  -9   48.40    4.00
  -9  -3   6   51.79    2.30
   9  -3  -6   56.59    2.40
  -6  -9   3   50.09    3.60
  -3  -6   9   46.40    3.00
  -3  -6   9   55.19    3.30
  -6   9  -3   48.90    3.30
   9  -3  -6   62.59    4.30
   3  -6  -9   47.60    3.50
   9   3   6   43.90    4.10
   6   9   3   45.70    4.20
   4   6  -9  316.57    8.50
   9  -4   6  331.77    8.90
   9   4  -6  325.17    8.00
  -4   6   9  315.67    8.50
   6  -9   4  322.17    8.40
   6  -9   4  326.77    9.40
  -9  -4  -6  326.07    9.40
   4  -6   9  328.37    9.40
  -9   4   6  337.77    8.00
   9  -4   6  342.67    9.60
   9   4  -6  336.07    9.50
   6   9  -4  320.47    9.00
  -4  -6  -9  342.97    9.50
   6   9  -4  332.87    9.10
  -6  -9  -4  310.97    9.20
   4  -6   9  310.17    7.90
   4   6  -9  328.67    8.70
  -4  -6   9  339.27    8.50
   6  -9  -4  340.07    9.40
  -4   6  -9  315.77    8.00
   6  -9  -4  343.97    9.00
   6   9   4  323.47    9.50
   9  -4  -6  337.47    9.60
   4  -6  -9  326.37    8.60
  -6   9  -4  321.17    8.40
   4   6   9  343.17    9.60
   9  -4  -6  335.67    8.00
   4  -6  -9  329.07    9.50
  -6  -9   4  334.27    9.00
  -9   4  -6  349.77    9.10
  -4  -6   9  307.87    8.50
   9   4   6  341.87    9.60
  -6  -9   4  314.57    8.80
  -9  -4   6  321.57    7.90
   6   9  -5  134.09    5.10
   5  -6   9  116.99    3.90
   9   5  -6  121.79    4.10
  -5  -6  -9  127.49    5.60
   5  -6   9  126.79    5.60
   6  -9   5  125.79    5.50
   9   5  -6  126.19    5.50
   5   6  -9  128.89    4.60
   5   6  -9  130.69    4.90
   6  -9   5  121.69    4.20
  -9   5   6  128.39    4.20
   9  -5   6  132.39    5.70
   6   9  -5  115.99    4.80
  -6  -9  -5  121.59    5.40
  -9  -5  -6  131.19    5.40
  -5   6   9  115.69    4.40
   9  -5   6  136.19    4.90
  -9  -5   6  128.69    4.10
   9  -5  -6  132.49    4.20
  -6   9  -5  120.19    4.30
   5  -6  -9  126.19    5.50
  -5  -6   9  133.29    4.50
   9   5   6  125.79    5.70
   9  -5  -6  129.29    5.50
   5   6   9  128.09    5.60
   6  -9  -5  129.69    5.30
  -5   6  -9  132.09    4.10
  -5  -6   9  118.59    4.70
  -6  -9   5  135.69    5.00
   6  -9  -5  128.29    4.90
  -6  -9   5  122.89    4.80
   5  -6  -9  120.19    4.60
  -9   5  -6  130.79    5.10
   6   9   5  132.29    5.60
   6  -6   9    1.20    1.30
  -6  -6  -9    0.00    2.10
  -9  -6  -6    0.00    2.20
   9  -6   6    2.40    1.70
   6  -9   6    1.10    1.30
   9   6  -6    0.00    2.20
   6  -6   9    1.60    2.30
   6   9  -6    2.10    2.00
  -6   6   9    0.00    1.40
   9   6  -6    0.00    1.40
   6   6  -9    0.00    1.90
   6   9  -6    0.90    1.90
   6  -9   6    0.00    2.20
  -6  -9  -6    0.00    2.20
   6   6  -9    0.00    1.60
  -9   6   6    1.00    1.50
   9  -6   6    0.00    2.10
   6  -9  -6    0.70    1.90
  -6  -6   9    0.10    1.50
   9  -6  -6    0.00    2.00
   9  -6  -6    0.10    1.50
  -6  -6   9    0.00    1.70
   6  -6  -9    0.00    1.50
  -9   6  -6    2.50    1.80
   9   6   6    2.20    2.30
  -6  -9   6    0.00    1.60
   6   9   6    0.30    2.10
  -6  -9   6    0.60    1.90
  -6   9  -6    0.00    1.40
  -9  -6   6    0.00    1.50
   6  -6  -9    1.00    2.10
   6   6   9    0.00    2.10
  -6   6  -9    1.30    1.40
   6  -9  -6    0.00    2.00
   6   9  -7   22.70    2.40
   7  -6   9   21.60    1.80
   7   6  -9   21.50    2.00
  -9   7   6   24.10    2.20
  -7  -6  -9   19.90    2.90
  -6  -9  -7   18.00    2.70
   9  -7   6   24.60    2.20
   6   9  -7   23.80    2.40
   7  -6   9   19.60    2.80
  -9  -7  -6   22.00    2.80
   6  -9   7   25.30    2.80
   9   7  -6   23.70    2.00
   9   7  -6   27.20    2.80
   7   6  -9   17.20    2.40
   6  -9   7   20.40    1.60
   9  -7   6   21.50    2.80
  -7   6   9   22.20    1.90
  -9   7  -6   25.10    2.30
   7  -6  -9   24.10    2.80
   7  -6  -9   25.20    2.00
  -6  -9   7   22.60    2.40
   9   7   6   18.70    2.80
  -7   6  -9   23.70    2.00
  -9  -7   6   23.20    2.10
   6   9   7   23.50    2.90
  -6  -9   7   19.70    2.10
  -7  -6   9   31.80    2.60
   9  -7  -6   24.60    2.10
   7   6   9   21.10    2.80
  -6   9  -7   17.60    1.70
   9  -7  -6   22.30    2.80
   6  -9  -7   22.90    2.40
   6  -9  -7   21.80    2.70
   8   6  -9   69.19    4.20
  -9   8   6   64.79    3.60
   6  -9   8   60.99    4.20
   9  -8   6   70.99    3.70
   9   8  -6   62.09    3.60
   9  -8   6   63.09    4.20
   9   8  -6   67.89    4.70
   6   9  -8   66.39    3.80
  -9  -8  -6   63.19    4.30
   8  -6   9   65.99    4.40
  -6  -9  -8   62.39    4.60
   6  -9   8   63.29    2.70
  -8   6   9   63.69    3.30
   8  -6   9   64.79    3.30
   8   6  -9   68.59    3.30
  -8  -6  -9   70.19    4.70
  -9  -8   6   74.39    3.80
   6  -9  -8   67.49    3.90
   8  -6  -9   66.69    3.30
  -6   9  -8   66.09    2.90
  -9   8  -6   73.19    3.90
   8   6   9   64.69    4.60
  -6  -9   8   63.49    3.70
  -8  -6   9   71.29    3.20
  -8   6  -9   61.79    3.60
  -6  -9   8   67.59    4.00
   9  -8  -6   62.69    4.50
   9   8   6   68.49    4.80
   6  -9  -8   60.99    4.40
   6   9   8   72.39    4.80
   8  -6  -9   67.29    4.60
   9  -8  -6   69.99    3.70
   0  -7  -9   48.50    3.90
  -7  -9   0   43.70    3.70
   9   0   7   44.70    3.40
   7  -9   0   48.40    3.70
   0  -7  -9   46.70    3.80
   0  -7   9   46.40    3.60
   9   0  -7   44.70    3.90
   7  -9   0   53.49    3.70
   0   7  -9   45.30    2.10
   7   9   0   48.70    3.90
   9   0   7   51.89    3.90
  -7   9   0   44.10    3.60
  -1  -7  -9    4.10    2.10
   9  -1   7    2.10    2.40
  -9  -1  -7    4.10    2.40
   9   1  -7    3.00    2.20
   9  -1   7    0.80    1.90
   1   7  -9    5.40    1.20
   7   9  -1    1.50    2.20
   1  -7   9    1.70    2.00
   7  -9   1    0.70    2.00
   7  -9   1    4.30    1.70
  -1  -7  -9    0.90    2.10
  -7  -9  -1    3.10    2.10
  -1  -7   9    3.00    1.90
  -7  -9   1    2.00    2.00
   9  -1  -7    3.60    2.20
  -1  -7   9    1.50    1.10
   1  -7  -9    0.80    1.90
   7   9   1    0.00    2.20
   7  -9  -1    0.40    2.00
  -7   9  -1    4.40    1.80
   9   1   7    4.50    2.10
   7  -9  -1    0.00    1.90
   1  -7  -9    2.40    2.10
   9  -2   7  217.68    6.70
   7  -9   2  208.58    6.40
   9   2  -7  210.28    7.00
   9  -2   7  222.88    7.30
   7   9  -2  208.98    7.00
  -7  -9  -2  216.88    6.90
  -9  -2  -7  217.58    7.10
   2   7  -9  205.38    6.60
   2  -7   9  217.98    6.90
   2   7  -9  210.78    5.70
  -2  -7  -9  217.68    6.90
   7  -9   2  219.68    7.00
  -7   9  -2  211.78    6.50
  -9   2  -7  221.98    6.90
   7  -9  -2  209.98    6.70
   2  -7  -9  217.88    7.10
   2   7   9  220.78    7.30
  -7  -9   2  212.58    6.80
   9   2   7  229.58    7.20
   7  -9  -2  215.98    6.90
   7   9   2  203.08    7.00
  -2  -7   9  206.28    6.30
   9  -2  -7  218.18    7.20
   2  -7  -9  225.18    6.60
  -2  -7   9  206.58    5.70
   3  -7   9    5.20    2.30
   7   9  -3    5.20    2.20
   9  -3   7    3.10    2.40
   9   3  -7    4.00    2.30
  -3  -7  -9    5.20    2.20
   7  -9   3    6.20    2.30
   3   7  -9    3.50    1.90
  -9   3   7    6.00    1.10
   9  -3   7    4.10    1.80
  -7  -9  -3    1.30    2.10
   3   7  -9    4.00    1.60
   9   3  -7    5.50    1.00
  -3   7   9    3.80    1.70
  -9  -3  -7    2.20    2.30
   7  -9   3    3.70    1.70
   9  -3  -7    4.50    2.30
   9  -3  -7    6.20    1.10
  -3  -7   9    4.20    1.30
   3   7   9    4.90    2.30
   3  -7  -9    4.70    2.20
   7   9   3    5.30    2.30
  -7  -9   3    6.20    2.00
   7  -9  -3    5.20    1.90
  -7   9  -3    2.20    1.80
   9   3   7    6.00    2.30
   7  -9  -3    4.40    2.00
  -3  -7   9    4.20    1.80
  -9   3  -7    7.90    2.00
   3  -7  -9    3.50    1.90
   7  -9   4  241.68    7.60
  -7  -9  -4  245.28    7.60
  -4   7   9  237.88    7.00
  -9   4   7  248.28    6.20
   4   7  -9  235.28    6.70
   4  -7   9  219.78    5.90
   9  -4   7  241.88    7.80
   7   9  -4  245.98    7.50
   4   7  -9  244.78    7.00
  -9  -4  -7  240.28    7.80
  -4  -7  -9  246.98    7.70
   7  -9   4  244.38    6.80
   4  -7   9  250.57    7.70
   9   4  -7  247.78    7.70
   9  -4   7  251.97    7.10
   9   4  -7  237.88    6.10
   4   7   9  237.78    7.90
  -7  -9   4  246.38    7.20
  -4  -7   9  239.58    6.80
   4  -7  -9  232.08    7.70
   7  -9  -4  252.47    7.20
  -4  -7   9  246.78    6.90
  -7   9  -4  233.28    6.90
   7  -9  -4  248.08    7.60
   7   9   4  250.27    8.00
   9  -4  -7  247.48    7.80
   9  -4  -7  241.38    6.20
  -9   4  -7  254.37    7.40
   4  -7  -9  236.68    7.00
  -4   7  -9  239.68    6.00
  -7  -9   4  241.08    7.40
   9   4   7  252.27    7.80
  -9  -4   7  241.48    6.10
   7   9  -5  125.49    5.00
   9   5  -7  127.19    4.00
   5   7  -9  124.19    4.70
  -9   5   7  133.49    4.10
   7  -9   5  127.29    4.40
  -9  -5  -7  128.09    5.40
   9   5  -7  125.39    5.30
  -7  -9  -5  133.09    5.60
   9  -5   7  143.59    4.90
   9  -5   7  133.89    5.80
   7  -9   5  128.29    5.60
   5   7  -9  133.19    4.90
   5  -7   9  117.59    3.80
   5  -7   9  133.39    5.60
  -5  -7  -9  125.19    5.60
  -5   7   9  121.79    4.70
   7   9  -5  126.19    5.10
  -9   5  -7  134.29    5.00
   7  -9  -5  131.29    5.00
   9  -5  -7  132.69    4.20
  -9  -5   7  131.39    4.10
  -7   9  -5  125.59    4.60
  -5   7  -9  124.29    4.00
   5  -7  -9  124.69    4.70
  -5  -7   9  119.39    4.70
   9  -5  -7  139.39    5.70
  -7  -9   5  131.29    4.90
   5  -7  -9  127.79    5.50
   5   7   9  135.29    5.80
   7  -9  -5  123.79    5.40
  -7  -9   5  122.49    4.90
   9   5   7  121.99    5.60
   7   9   5  139.89    5.80
  -5  -7   9  129.29    4.60
  -9   6   7   22.30    1.90
   7  -9   6   24.20    1.90
   6   7  -9   20.80    2.40
   7   9  -6   21.20    2.20
   6  -7   9   18.90    2.70
   7   9  -6   18.40    2.40
   6   7  -9   24.60    2.20
  -6   7   9   18.60    2.00
  -7  -9  -6   20.20    2.70
   9   6  -7   22.40    2.70
  -6  -7  -9   23.20    2.80
   9  -6   7   25.70    2.20
  -9  -6  -7   21.10    2.90
   6  -7   9   20.10    1.60
   9   6  -7   20.50    1.80
   7  -9   6   21.20    2.70
   9  -6   7   24.30    2.90
  -6  -7   9   24.70    2.10
   7   9   6   17.90    2.70
  -9  -6   7   19.00    1.80
  -6  -7   9   18.80    2.20
   7  -9  -6   26.70    2.80
   7  -9  -6   24.50    2.40
  -7   9  -6   20.20    1.90
  -7  -9   6   23.60    2.40
   9  -6  -7   24.60    2.80
   9  -6  -7   21.60    1.90
  -6   7  -9   21.50    1.70
   9   6   7   22.80    2.90
   6  -7  -9   22.90    2.70
   6  -7  -9   24.90    2.20
  -9   6  -7   24.00    2.30
   6   7   9   25.20    2.90
  -7  -9   6   20.70    2.20
   7  -9   7    0.00    2.20
   9  -7   7    0.00    2.20
   7  -7   9    0.00    2.20
  -7  -9  -7    0.00    2.10
   7   7  -9    2.20    2.00
   7   7  -9    0.30    1.60
  -7  -7  -9    0.00    2.20
   9   7  -7    0.00    2.10
   9   7  -7    0.00    1.50
   7  -7   9    0.00    1.20
  -7   7   9    0.00    1.50
  -9  -7  -7    0.00    2.20
   7   9  -7    0.00    1.70
   7   9  -7    0.00    2.00
  -9   7   7    1.30    1.60
   7  -9   7    0.00    1.30
   9  -7   7    0.00    1.60
   7  -9  -7    1.10    1.80
  -7  -7   9    0.60    1.70
  -7   9  -7    0.00    1.40
  -7  -9   7    0.00    1.70
  -7  -9   7    0.00    1.80
   7   7   9    0.00    2.20
  -7  -7   9    0.50    1.60
   7  -9  -7    0.00    2.10
   7   9   7    1.90    2.30
   9  -7  -7    0.00    1.60
  -9   7  -7    0.00    1.70
   7  -7  -9    0.00    2.10
  -9  -7   7    0.00    1.50
   7  -7  -9    0.20    1.70
   9  -7  -7    0.40    2.20
  -7   7  -9    0.10    1.40
   9   7   7    0.00    2.20
  -8   7   9   17.60    1.90
  -9  -8  -7   18.70    2.80
   9   8  -7   12.70    2.00
   9  -8   7   18.70    2.10
   8  -7   9   18.40    1.80
   7   9  -8   17.40    2.40
   8   7  -9   17.40    2.50
   8   7  -9   18.50    1.90
   9  -8   7   16.50    2.70
   7   9  -8   14.90    2.10
  -7  -9  -8   16.30    2.70
   7  -9   8   18.80    1.70
   7  -9   8   18.30    2.70
   9   8  -7   17.00    2.70
  -8  -7  -9   17.20    2.80
  -9   8   7   19.00    2.10
   8  -7   9   17.60    2.80
  -7  -9   8   21.80    2.40
  -7  -9   8   19.40    2.20
   9   8   7   14.40    2.80
   8  -7  -9   17.90    2.70
   8   7   9   21.40    2.90
   7   9   8   16.00    2.70
   9  -8  -7   17.80    2.10
   8  -7  -9   16.10    2.00
  -9  -8   7   15.00    2.10
  -9   8  -7   17.40    2.10
  -8  -7   9   20.50    2.00
  -8   7  -9   20.30    2.00
  -7   9  -8   18.30    1.70
   7  -9  -8   17.60    2.70
   7  -9  -8   19.80    2.30
   9  -8  -7   19.00    2.80
   0  -8   9    1.00    2.00
   8  -9   0    0.40    1.80
   9   0   8    0.00    1.80
   8  -9   0    0.00    2.00
   9   0  -8    0.00    2.20
   8   9   0    0.00    2.10
   9   0   8    2.30    2.40
   0  -8  -9    0.00    2.00
  -8  -9   0    0.00    1.90
   0  -8  -9    2.20    2.10
  -1  -8  -9    3.20    2.10
  -9  -1  -8    0.30    2.40
   9  -1   8    4.10    1.90
   1   8  -9    5.60    1.10
   9   1  -8    1.90    2.20
  -1  -8  -9    1.40    2.10
   1  -8   9    3.40    2.00
   8   9  -1    1.80    2.30
   9  -1   8    5.60    2.50
  -8  -9  -1    2.10    2.00
   8  -9   1    3.30    1.90
   8  -9   1    0.30    2.00
  -8   9  -1    3.90    1.90
   9   1   8    3.90    2.10
  -1  -8   9    1.30    1.00
   8  -9  -1    2.80    2.00
   1  -8  -9    2.30    2.00
  -1  -8   9    5.70    2.00
   8  -9  -1    4.40    2.00
   8   9   1    1.90    2.20
   9  -1  -8    2.20    2.20
  -8  -9   1    4.60    2.10
   1  -8  -9    1.90    2.10
   8  -9   2   18.30    2.50
   9   2  -8   16.60    2.60
   2  -8   9   19.30    2.60
  -2  -8  -9   20.80    2.60
   2   8  -9   18.30    1.60
   8   9  -2   18.90    2.60
   9  -2   8   19.40    2.20
   8  -9   2   16.50    2.10
   9  -2   8   17.50    2.80
  -8  -9  -2   19.50    2.50
  -9  -2  -8   15.10    2.70
  -2  -8   9   21.70    2.30
   8   9   2   17.00    2.70
  -8  -9   2   19.10    2.30
   9  -2  -8   15.50    2.60
   2   8   9   13.20    2.50
   8  -9  -2   21.70    2.50
   9   2   8   19.50    2.60
  -8   9  -2   16.70    2.20
   2  -8  -9   20.80    2.40
  -2  -8   9   15.20    1.40
   8  -9  -2   19.20    2.40
   2  -8  -9   19.80    2.70
   9  -3   8  174.28    6.40
  -9  -3  -8  166.08    6.50
   9   3  -8  169.38    6.20
   3   8  -9  165.58    5.10
  -9   3   8  175.68    4.50
  -8  -9  -3  168.88    6.00
  -3  -8  -9  175.48    6.30
   3  -8   9  171.58    6.20
   8  -9   3  178.08    6.20
   9  -3   8  174.58    5.90
   8   9  -3  177.88    6.30
   8  -9   3  184.88    5.70
   9  -3  -8  177.58    6.70
  -8   9  -3  178.58    5.90
  -8  -9   3  167.88    5.90
   8   9   3  183.98    6.60
   3  -8  -9  178.88    5.80
   3   8   9  182.18    6.60
   9   3   8  186.88    6.40
   8  -9  -3  183.88    5.90
   9  -3  -8  173.28    4.60
   8  -9  -3  170.88    6.10
   3  -8  -9  181.98    6.50
  -9   3  -8  185.68    6.00
  -3  -8   9  164.48    5.10
  -3  -8   9  183.68    5.80
   4  -8   9   28.30    2.90
   9   4  -8   30.50    2.90
   9   4  -8   32.40    2.20
   8  -9   4   32.50    3.00
  -4  -8  -9   27.80    2.90
   4   8  -9   33.00    2.90
   9  -4   8   28.80    3.10
  -9   4   8   25.00    2.20
  -9  -4  -8   29.40    3.00
   8  -9   4   29.40    2.30
   4   8  -9   29.60    2.50
   9  -4   8   36.30    3.30
   8   9  -4   31.90    2.90
  -8  -9  -4   32.80    3.00
   4  -8  -9   35.10    2.70
   9   4   8   29.80    3.00
  -4  -8   9   37.10    3.20
   8  -9  -4   31.50    2.90
  -8  -9   4   32.20    2.60
  -8   9  -4   28.20    2.40
   8  -9  -4   31.20    2.60
   4  -8  -9   32.20    3.00
  -9   4  -8   29.70    2.50
  -9  -4   8   28.60    2.10
   8   9   4   34.00    3.20
   9  -4  -8   34.70    3.10
   9  -4  -8   31.80    2.30
   4   8   9   29.00    3.00
  -4  -8   9   24.80    2.00
  -5   8   9    1.10    1.70
   8   9  -5    0.00    1.70
   5  -8   9    1.80    2.30
   9   5  -8    2.80    2.20
   8  -9   5    1.80    1.60
   9  -5   8    0.00    1.60
   9  -5   8    2.10    2.40
   5   8  -9    0.30    1.80
   8   9  -5    4.10    2.20
  -9  -5  -8    0.80    2.30
  -5  -8  -9    0.10    2.10
   5  -8   9    2.70    1.00
  -9   5   8    0.00    1.30
  -8  -9  -5    0.40    2.10
   8  -9   5    2.20    2.20
   9   5  -8    3.90    1.30
   5   8  -9    2.60    1.80
   9  -5  -8    3.90    2.20
   5  -8  -9    1.40    2.10
  -5   8  -9    0.00    1.10
  -8   9  -5    2.10    1.70
   5   8   9    2.60    2.30
   8   9   5    1.30    2.30
   8  -9  -5    2.50    1.90
   9  -5  -8    2.40    1.40
  -8  -9   5    3.60    1.90
  -9  -5   8    3.70    1.30
  -9   5  -8    2.20    1.80
   8  -9  -5    3.80    2.10
   9   5   8    4.10    2.30
  -5  -8   9    0.70    1.50
  -5  -8   9    3.60    1.80
   5  -8  -9    4.20    1.90
   8  -9   6   65.19    4.20
   8   9  -6   65.09    3.80
   6  -8   9   64.19    2.80
  -6   8   9   69.29    3.70
   8   9  -6   57.39    4.20
  -9  -6  -8   69.59    4.80
   8  -9   6   64.49    3.50
   6  -8   9   68.29    4.60
   9   6  -8   62.59    3.20
   6   8  -9   60.89    3.80
   9  -6   8   69.79    4.50
  -6  -8  -9   68.49    4.40
   6   8  -9   64.19    3.90
  -8  -9  -6   62.09    4.40
   9  -6   8   68.49    3.60
  -9   6   8   65.39    3.30
   9   6  -8   62.99    4.30
  -9  -6   8   64.49    3.20
   8   9   6   67.49    4.70
  -6  -8   9   67.49    3.60
   8  -9  -6   69.69    3.90
  -6  -8   9   63.79    3.70
   6   8   9   68.59    5.10
  -6   8  -9   62.69    3.00
   9  -6  -8   69.99    4.60
  -8  -9   6   69.89    4.00
  -8   9  -6   65.59    3.60
   8  -9  -6   66.69    4.40
   6  -8  -9   61.39    4.70
   6  -8  -9   68.59    3.70
  -9   6  -8   66.89    3.80
   9   6   8   72.49    4.70
   9  -6  -8   68.69    3.30
   8   9  -7   16.60    2.20
   7  -8   9   20.30    1.70
   7  -8   9   21.80    2.90
   9  -7   8   17.60    2.00
   9  -7   8   16.80    2.80
   9   7  -8   20.70    2.70
   9   7  -8   18.10    1.90
   7   8  -9   17.00    2.40
  -8  -9  -7   17.80    2.80
   8  -9   7   17.40    2.70
   8   9  -7   18.00    2.50
  -7   8   9   14.70    2.10
   8  -9   7   19.70    1.90
   7   8  -9   19.50    2.20
  -9  -7  -8   17.90    2.80
  -7  -8  -9   16.10    2.80
  -9   7   8   17.90    2.00
   9  -7  -8   16.90    2.70
   9  -7  -8   23.00    2.10
   9   7   8   14.90    2.80
   7   8   9   15.40    2.70
  -7  -8   9   21.20    2.20
  -7   8  -9   20.00    1.80
   8  -9  -7   17.50    2.20
   7  -8  -9   17.10    2.70
  -9  -7   8   18.30    1.90
  -9   7  -8   17.30    2.20
   7  -8  -9   20.00    2.20
   8   9   7   17.90    2.80
  -8  -9   7   21.10    2.30
  -8   9  -7   17.30    2.00
   8  -9  -7   20.70    2.70
  -7  -8   9   19.90    2.20
  -9  -8  -8    0.00    2.30
  -9  -8  -8    0.00    1.30
   8   9  -8    0.00    1.70
   8  -8   9    0.70    1.40
   8  -8   9    0.70    2.40
   8  -8   9    0.00    1.30
  -9   8   8    1.50    1.70
  -9   8   8    0.00    1.40
  -8  -9  -8    0.00    2.30
  -8  -9  -8    0.00    1.30
   9  -8   8    0.00    1.40
   9   8  -8    0.00    2.20
  -8  -8  -9    2.60    2.40
  -8  -8  -9    0.50    1.30
   8   8  -9    0.00    1.60
   8  -9   8    0.00    1.40
   9   8  -8    0.00    1.60
   9  -8   8    1.70    1.60
  -8   8   9    0.00    1.60
  -8   8   9    0.00    1.30
   8  -9   8    0.50    2.40
  -8   9   8    0.60    1.40
   8   9  -8    0.00    2.20
   8   8  -9    0.00    2.10
   9  -8   8    0.00    2.30
   8  -9   8    0.20    1.50
  -8   9  -8    2.60    1.60
  -8  -8   9    0.00    1.20
  -8   8  -9    0.60    1.60
   8  -8  -9    2.50    1.80
   8  -9  -8    0.10    1.20
  -9  -8   8    0.00    1.30
  -9   8  -8    0.00    1.70
  -9   8  -8    0.00    1.30
   8  -9  -8    2.10    1.90
  -8  -8   9    0.70    1.80
   8   8   9    0.00    2.30
   8   8   9    0.00    1.40
   8  -9  -8    3.00    2.30
  -9  -8   8    0.60    1.70
   8   9   8    2.30    2.40
   8   9   8    0.00    1.40
   9  -8  -8    3.00    2.30
   9  -8  -8    0.50    1.70
   9  -8  -8    0.00    1.20
  -8   8  -9    0.00    1.30
   8  -8  -9    0.00    1.20
  -8  -9   8    0.10    1.80
  -8  -9   8    0.00    1.30
   8  -8  -9    0.00    2.10
   9   8   8    0.00    2.30
   9   8   8    0.00    1.40
  -9  -9   0  700.03   17.30
   0  -9  -9  720.93   18.00
   0  -9  -9  708.63   17.50
   0  -9   9  692.03   17.40
   9  -9   0  713.43   17.50
   9  -9   0  738.63   17.50
   9   0  -9  721.23   17.90
   9   0   9  736.33   17.60
   9   0   9  705.33   17.90
   9   9   0  725.43   17.90
  -9  -9  -1    0.00    2.00
   9   1  -9    2.30    2.30
  -1  -9  -9    0.00    2.10
  -1  -9  -9    2.90    2.20
   9  -1   9    0.00    2.50
   9  -9   1    1.20    2.10
   9  -9   1    0.00    1.90
   9   9  -1    0.00    2.30
   1  -9   9    2.70    2.20
   1   9  -9    0.40    1.10
   9  -1   9    0.00    1.70
   9  -9  -1    0.00    1.90
   1  -9  -9    0.00    2.10
  -1  -9   9    2.20    2.00
   9  -1  -9    1.50    2.30
   9  -9  -1    1.60    2.00
  -1  -9   9    0.00    0.90
  -9  -9   1    0.00    1.90
   9   1   9    2.00    2.00
   1  -9  -9    1.10    2.00
   9   9   1    1.70    2.30
  -9  -9  -2  343.77    9.80
   9  -2   9  365.96    9.70
  -9  -2  -9  331.97   10.00
   9   2  -9  341.97    9.90
  -2  -9  -9  346.57   10.00
   9   9  -2  344.07    9.90
   9  -2   9  367.36   10.50
   9  -9   2  359.36    9.80
   9  -9   2  358.16    9.60
   2  -9   9  337.47    9.70
   2   9  -9  335.77    8.60
   2   9   9  368.36   10.60
   9  -9  -2  361.26   10.00
   9  -9  -2  361.06    9.60
   2  -9  -9  352.16    9.70
   2  -9  -9  364.56   10.40
   9  -2  -9  349.47   10.10
  -9  -9   2  343.37    9.50
  -2  -9   9  348.27    9.50
  -9   9  -2  366.76    9.70
   9   2   9  357.96   10.00
  -2  -9   9  335.87    8.50
   9   9   2  380.26   10.50
  -9  -9  -3    0.30    2.10
   9   3  -9    0.50    2.20
  -9  -3  -9    2.00    2.40
   9  -3   9    1.20    1.70
   9  -3   9    0.00    2.40
  -3  -9  -9    0.80    2.10
   3  -9   9    0.00    2.10
   9   9  -3    0.00    2.20
   9  -9   3    0.00    2.10
   9  -9   3    0.00    1.80
   3   9  -9    0.00    1.40
  -3  -9   9    0.00    1.20
   3   9   9    0.00    2.20
   9  -9  -3    0.00    2.00
   9  -9  -3    0.00    1.90
  -9  -9   3    3.20    1.90
   3  -9  -9    1.10    2.10
   9  -3  -9    0.10    2.20
   9  -3  -9    1.00    1.00
  -9   3  -9    0.40    1.90
  -9   9  -3    0.00    1.90
   3  -9  -9    1.70    2.00
   9   3   9    0.00    2.10
  -3  -9   9    3.40    1.90
   9   9   3    1.00    2.30
  -9  -9  -4  171.08    6.30
   9   4  -9  168.58    6.20
  -9  -4  -9  184.38    6.50
   4  -9   9  174.18    6.40
  -9   4   9  165.98    4.80
   9  -4   9  185.08    6.70
  -4  -9  -9  177.48    6.50
   9   4  -9  174.78    4.70
   9  -4   9  170.78    5.70
   9   9  -4  180.48    6.40
   9  -9   4  180.68    5.70
   9  -9   4  167.78    6.20
   4   9  -9  177.38    5.40
   4   9   9  167.08    6.60
   9  -9  -4  179.28    6.60
   9  -9  -4  181.58    5.90
   4  -9  -9  175.28    6.00
  -9   4  -9  179.08    6.00
   9  -4  -9  178.18    6.80
   9  -4  -9  176.48    4.80
  -4  -9   9  186.08    5.90
  -9   9  -4  174.08    5.90
  -9  -9   4  173.78    5.80
  -4  -9   9  160.98    5.30
   9   4   9  171.68    6.50
   4  -9  -9  173.68    6.50
   9   9   4  179.38    6.90
  -9  -9  -5    0.00    2.10
   9  -5   9    0.00    2.30
  -9  -5  -9    0.00    2.30
   9   5  -9    0.00    1.30
   5  -9   9    0.00    2.30
  -9   5   9    0.00    1.20
   9  -9   5    0.00    2.20
  -5  -9  -9    0.00    2.20
   9   5  -9    0.00    2.20
   9  -5   9    0.00    1.60
   9   9  -5    2.90    2.30
   5   9  -9    0.00    1.80
   9  -9   5    0.00    1.70
  -5  -9   9    0.00    1.50
  -9   5  -9    0.00    1.70
   9  -9  -5    0.00    2.10
   9  -9  -5    0.00    1.80
   5   9   9    0.00    2.20
  -9   9  -5    0.90    1.80
   9  -5  -9    0.00    2.10
   9  -5  -9    2.60    1.30
  -5  -9   9    0.70    1.90
  -9  -9   5    1.40    1.90
   5  -9  -9    0.00    1.90
  -9  -5   9    0.30    1.30
   9   5   9    0.00    2.20
   5  -9  -9    0.00    2.20
   9   9   5    0.00    2.30
  -9  -9  -6  203.18    7.20
   9   9  -6  194.08    6.20
  -9  -6  -9  202.08    7.30
  -9  -6  -9  199.68    5.90
   9  -6   9  190.78    7.00
   9  -6   9  207.98    5.90
   9   6  -9  206.08    6.90
   9   6  -9  202.88    5.70
  -9   6   9  191.78    5.70
   9   9  -6  188.98    6.80
  -6  -9  -9  192.08    7.10
  -6  -9  -9  205.08    6.00
  -6  -9  -9  201.08    5.80
   6  -9   9  208.48    7.20
   9  -9   6  210.68    6.20
   9  -6   9  202.88    6.10
  -6   9   9  198.18    6.60
   6  -9   9  199.48    5.30
   6   9  -9  201.68    6.40
   9  -9   6  193.48    7.00
   6  -9  -9  211.08    7.30
  -6  -9   9  191.78    6.20
   6  -9  -9  199.38    6.40
   6   9   9  201.98    7.50
   9  -9  -6  201.98    7.30
   9  -9  -6  202.18    6.40
  -6  -9   9  197.28    6.20
   6  -9  -9  201.68    6.00
   9  -6  -9  202.28    7.20
   9  -6  -9  197.98    5.70
   9  -6  -9  204.18    5.90
  -6   9  -9  199.28    5.40
  -9  -6   9  206.48    5.70
  -9  -6   9  208.38    6.10
  -9   6  -9  202.58    6.40
  -9   6  -9  203.68    6.10
   9   6   9  204.48    7.30
  -9   9  -6  197.48    6.20
  -9  -9   6  209.78    6.40
   9   9   6  196.28    7.40
   9   9   6  201.68    6.00
  -9  -9  -7    1.50    2.30
  -9  -9  -7    0.00    1.40
   9  -7   9    0.00    2.30
   9  -7   9    0.00    1.40
  -9  -7  -9    0.00    2.40
  -9  -7  -9    0.00    1.40
   9  -9   7    0.00    1.40
   7   9  -9    0.00    2.00
   9   9  -7    0.00    2.20
   9   9  -7    0.00    1.70
  -9   7   9    0.00    1.50
  -9   7   9    0.00    1.40
   9  -9   7    1.00    2.40
  -7  -9  -9    0.00    2.30
  -7  -9  -9    0.00    1.40
   9   7  -9    0.00    1.50
   9  -9   7    1.80    1.70
   9  -7   9    1.00    1.60
   9   7  -9    2.60    2.30
   7  -9   9    1.00    2.40
  -7   9   9    0.00    1.40
   7  -9   9    1.50    1.30
   7  -9   9    0.00    1.40
   7  -9  -9    0.00    1.20
  -9  -7   9    0.00    1.30
  -7   9  -9    0.00    1.40
   7  -9  -9    0.30    1.90
  -7  -9   9    0.00    1.70
   7   9   9    0.20    2.40
  -7   9  -9    0.60    1.50
   9  -9  -7    0.00    1.80
   9  -9  -7    0.00    1.20
  -7  -9   9    0.00    1.80
  -9   9  -7    0.50    1.70
  -9  -7   9    0.50    1.60
   9  -7  -9    0.00    2.20
   9  -7  -9    0.00    1.60
   9  -7  -9    0.00    1.20
  -7  -9   9    0.00    1.30
  -9  -9   7    0.40    1.80
  -9  -9   7    0.00    1.30
   9  -9  -7    0.50    2.20
   7  -9  -9    0.00    2.10
   9   7   9    0.00    2.40
   9   7   9    0.00    1.40
  -9   7  -9    0.00    1.80
  -9   7  -9    0.00    1.30
   9   9   7    0.00    2.40
   9   9   7    0.00    1.30
  -9  -9  -8  395.96   11.50
  -9  -9  -8  418.66   11.00
  -8  -9  -9  410.66   11.60
   9  -8   9  408.56   10.50
  -9  -8  -9  417.76   11.80
  -9  -8  -9  412.36   11.00
   9   8  -9  410.16   11.30
   9   8  -9  408.76   10.50
   9  -9   8  419.16   11.00
   9   9  -8  410.86   11.30
  -9   8   9  416.96   12.80
   8   9  -9  407.06   11.10
   8   9  -9  422.46   10.80
  -9   9   8  427.36   12.90
   8  -9   9  418.76   11.00
  -8  -9  -9  423.66   11.00
   8  -9   9  400.66   10.20
   8  -9   9  404.76   11.60
   9  -9   8  411.46   10.50
   9   9  -8  402.16   10.60
  -8   9   9  418.96   12.80
   9  -8   9  413.46   11.00
   9  -8   9  421.86   11.80
   9  -9   8  416.06   11.70
  -8  -9   9  417.76   10.70
   8  -9  -9  403.86   10.70
  -9  -9   8  414.76   10.70
  -9   9  -8  401.26   10.60
  -9   9  -8  426.66   11.40
  -8  -9   9  423.96   11.30
   8   9   9  410.66   11.20
   9  -9  -8  415.06   11.80
   9  -9  -8  426.16   10.70
   9  -9  -8  403.26   11.10
  -8   9  -9  410.46   10.40
   8  -9  -9  414.86   11.20
  -9   8  -9  413.16   10.60
   9  -8  -9  417.56   11.90
   9  -8  -9  408.56   10.50
   9  -8  -9  402.46   11.10
  -9  -9   8  414.76   11.30
   8   9   9  404.96   11.90
   8  -9  -9  416.36   11.90
  -9  -8   9  413.86   10.50
  -9  -8   9  415.06   11.30
   9   8   9  412.56   11.90
  -9   8  -9  416.36   11.30
  -8   9  -9  425.66   11.40
   9   9   8  425.06   12.00
   9   9   8  404.16   11.20
  -9  -9  -9    3.80    2.80
  -9  -9  -9    0.00    1.50
   9   9  -9    0.50    2.50
   9   9  -9    0.00    1.80
   9  -9   9    0.00    2.50
   9  -9   9    0.00    1.50
   9  -9   9    0.00    1.70
  -9   9   9    0.00    1.60
  -9   9  -9    0.00    1.50
   9  -9  -9    0.00    1.90
   9  -9  -9    0.00    1.40
   9  -9  -9    0.00    2.40
  -9  -9   9    0.50    1.50
  -9   9  -9    0.00    1.70
  -9  -9   9    0.40    2.00
  -9  -9   9    0.00    1.40
   9   9   9    1.10    2.70
   9   9   9    0.00    1.50
   0 -10   0  155.18    5.80
   0   0 -10  147.79    5.20
   0   0  10  153.18    5.20
   0   0  10  153.88    5.40
   0   0  10  153.48    5.30
   0  10   0  146.89    5.20
   0  10   0  145.19    5.10
  10   0   0  143.19    5.80
  10   0   0  161.28    5.20
  10   0   0  148.59    5.10
   0 -10   1    3.20    2.10
   0  10  -1    0.10    1.70
   0  10  -1    0.00    1.60
   0  10   1    0.00    1.90
   0  10   1    0.00    1.80
   1   0 -10    0.00    1.80
   1   0  10    0.00    1.60
   1   0  10    0.00    2.00
   1   0  10    0.00    1.80
  10  -1   0    0.00    2.20
  10  -1   0    0.00    1.80
  10   1   0    0.00    2.10
  10   1   0    0.00    1.80
  -1   0  10    0.00    1.70
  -1   0  10    0.00    1.90
  -1   0  10    0.20    1.80
   0 -10  -1    0.00    2.00
  -1   0 -10    0.00    1.80
 -10  -1   0    0.00    1.80
   0  10   2 2902.11   68.39
   2   0  10 3053.39   68.29
   2   0  10 3087.89   68.29
   2   0  10 3096.29   67.89
   2   0  10 2971.50   67.69
  10  -2   0 3186.78   68.79
  10  -2   0 3050.99   67.49
  10   2   0 3124.49   68.79
   2   0 -10 3097.59   68.39
   0  10  -2 2969.00   67.89
  -2   0  10 3027.90   67.39
   0 -10  -2 2983.30   67.89
   0 -10   2 3127.19   67.99
   0  10  -2 3030.50   67.99
  -2   0  10 3090.59   67.39
 -10  -2   0 3121.49   67.49
 -10   2   0 3034.70   67.49
  -2   0  10 3113.19   68.39
  10   2   0 3092.39   67.49
  10  -3   0    0.00    1.80
  10   3   0    0.20    2.20
   0  10   3    1.40    1.90
  10  -3   0    0.00    2.10
   3   0  10    0.00    1.70
   3   0  10    0.00    1.70
   3   0  10    0.00    2.30
   3   0 -10    0.00    1.90
  -3   0  10    1.80    1.70
  -3   0  10    0.00    1.50
   0 -10  -3    0.00    2.10
   0 -10   3    6.10    2.20
   0  10  -3    1.50    1.50
   0  10  -3    0.00    1.40
  -3   0  10    1.70    1.70
 -10   3   0    0.00    1.90
  10   3   0    0.00    1.70
 -10  -3   0    0.00    1.80
 -10   4   0  253.77    7.20
  10  -4   0  247.98    7.60
   4   0  10  252.67    7.20
   4   0  10  257.77    8.00
  10   4   0  254.27    7.10
   0 -10  -4  258.17    7.70
   0 -10  -4  244.98    7.60
   0 -10   4  240.08    7.50
   0  10  -4  230.38    6.40
   0  10  -4  239.58    6.40
   4   0 -10  235.38    7.20
  -4   0  10  252.57    7.40
  -4   0  10  249.18    6.60
  -4   0  10  247.38    6.50
  10  -4   0  252.97    7.10
  10   4   0  251.87    7.80
 -10  -4   0  246.78    7.00
  -4   0 -10  259.27    7.30
   0 -10  -5    0.00    2.00
  10   5   0    0.00    2.10
   0 -10  -5    0.00    2.00
   0 -10   5    1.80    2.00
   0  10  -5    0.00    1.20
   5   0 -10    0.60    1.90
   5   0  10    0.00    2.30
 -10  -5   0    0.40    1.80
  10  -5   0    0.00    2.00
  10  -5   0    0.00    1.80
  -5   0  10    0.00    1.40
   5   0  10    1.90    1.70
  -5   0  10    0.00    1.30
 -10   5   0    0.50    1.90
  10   5   0    0.00    1.70
  -5   0 -10    0.70    1.70
  10  -6   0    0.00    2.00
  10  -6   0    2.50    1.90
   6   0  10    1.40    1.70
   6   0  10    0.40    2.40
   0  10  -6    0.00    1.10
   0 -10  -6    0.00    2.00
  10   6   0    0.00    2.20
  10   6   0    3.00    1.90
  -6   0  10    0.00    1.10
   0 -10  -6    0.00    2.00
 -10  -6   0    2.50    1.90
   0 -10   6    2.90    2.10
  -6   0  10    2.30    1.20
   6   0 -10    1.40    2.00
  -6   0 -10    0.00    1.80
  10   7   0    1.30    2.20
  10  -7   0    0.00    2.00
   7   0 -10    0.80    2.10
  10  -7   0    0.00    1.90
   0 -10  -7    0.00    2.00
   0 -10   7    0.00    2.00
   7   0  10    0.00    1.70
   0 -10  -7    0.00    2.00
 -10  -7   0    0.00    1.80
   7   0  10    0.40    2.30
  10  -8   0   22.80    2.50
   0 -10  -8   22.80    2.80
   0 -10   8   23.10    2.70
  10  -8   0   26.70    2.60
  10   8   0   24.30    2.90
   8   0  10   20.70    3.00
   0 -10  -8   23.50    2.70
   8   0  10   26.00    2.50
 -10  -8   0   23.60    2.50
   8   0 -10   27.30    2.90
  10   9   0    2.80    2.40
   9   0  10    0.00    1.90
   9   0 -10    0.00    2.20
  10  -9   0    1.00    2.00
   0 -10   9    0.00    2.10
   0 -10  -9    0.00    2.00
   0 -10  -9    0.00    2.10
  10  -9   0    0.00    2.00
   9   0  10    0.00    2.40
 -10  -9   0    1.60    2.10
   0   1 -10    0.00    1.70
   0  -1  10    0.00    1.60
   0  -1  10    0.00    1.90
  10   0   1    0.70    2.10
  10   0  -1    0.00    2.10
   0  -1  10    0.00    1.70
   1 -10   0    0.00    1.60
   1  10   0    0.00    1.70
   0  -1 -10    0.00    2.00
  10   0  -1    0.00    1.80
  10   0  -1    0.00    1.70
   1  10   0    0.80    1.90
  10   0   1    0.00    2.00
  -1 -10   0    0.00    2.10
  -1  10   0    0.00    1.70
   0  -1 -10    0.50    1.90
   0   1  10    0.00    1.80
   0   1  10    0.00    1.80
   1 -10   0    0.20    2.10
  10   0   1    0.00    1.80
  10   1  -1  937.61   21.70
  -1 -10  -1  964.80   22.50
   1  -1  10  962.70   22.10
  10   1  -1  954.50   22.80
  10  -1   1  985.70   22.80
  10  -1   1  947.81   22.00
  10  -1   1  957.70   22.10
   1  -1  10  949.31   22.20
   1 -10   1  983.60   22.50
   1  -1  10  941.01   22.10
  -1  -1 -10  971.50   22.40
  -1  -1 -10  952.80   22.20
  -1   1  10  934.11   21.90
   1  10  -1  922.71   22.10
  -1  10   1  927.81   22.20
 -10  -1  -1  950.40   22.00
  -1   1  10  991.20   22.50
   1   1 -10  943.41   22.20
  -1 -10   1  967.50   22.50
  -1  -1  10  949.11   21.90
   1  10   1  950.30   22.40
  10   1   1  967.60   22.80
 -10  -1   1  955.20   21.80
   1   1  10  975.30   22.40
   1 -10  -1  926.51   22.40
  -1  10  -1  919.11   22.00
  -1  -1  10  948.21   22.20
   1 -10  -1  947.71   22.20
  10  -1  -1  942.31   21.80
  10   1   1  965.80   22.00
  -1   1 -10  972.50   22.20
   1  -1 -10  980.10   22.50
   1  -1 -10  954.60   22.00
  10  -1  -1  994.30   22.90
  -1  -1  10  943.41   22.00
   1   1  10  923.81   22.10
   1  10   1  936.41   22.30
  10   2  -1  582.14   13.60
   2  -1  10  569.34   14.30
   2  -1  10  588.44   13.90
   2  -1  10  586.94   13.90
  -2   1  10  570.64   13.60
   2  -1  10  552.94   14.10
 -10   2   1  573.94   13.70
 -10  -2  -1  588.34   13.90
  -2   1  10  590.24   14.20
  -1 -10  -2  560.84   14.20
  10   2  -1  583.74   14.60
   1 -10   2  556.44   14.20
  10  -2   1  579.24   14.00
  -1  10   2  573.64   14.20
   2   1 -10  582.24   14.00
  -2  -1 -10  570.44   14.20
   1  10  -2  522.75   13.60
  10  -2   1  558.64   14.40
  10   2   1  574.34   14.50
 -10  -2   1  606.34   13.70
   1  10   2  565.34   14.20
  -1 -10   2  552.74   14.20
  -2  -1  10  553.94   13.70
   2   1  10  578.74   14.20
   2   1  10  598.74   14.20
  -1 -10   2  535.35   13.60
  10  -2  -1  578.74   14.50
  10  -2  -1  584.54   13.70
   2  -1 -10  579.94   14.20
   1  10   2  565.14   14.40
   1 -10  -2  575.14   14.10
   1 -10  -2  555.84   14.20
  -2  -1  10  589.04   14.00
 -10   2  -1  583.14   14.00
   2  -1 -10  572.04   13.70
   2   1  10  566.44   14.10
  -2  -1  10  553.74   13.60
  -1  10  -2  554.04   13.60
  10   2   1  607.34   13.90
 -10   3   1   99.09    4.30
   1  10  -3  100.79    4.00
  -1 -10  -3   93.19    5.00
  10   3  -1   98.79    4.10
  -3   1  10  104.29    3.80
 -10  -3  -1  101.89    4.30
   3   1 -10  102.69    4.30
   3  -1  10   88.09    4.00
   1 -10   3   98.09    4.90
   3  -1  10   91.29    4.90
  -1  10   3  100.09    4.80
   3  -1  10   87.49    4.20
  -3   1  10  101.49    4.60
  -3  -1 -10  104.69    4.80
  10  -3   1   95.89    4.70
  10   3  -1  105.79    5.00
  10  -3   1   97.79    4.30
   3   1  10   87.69    4.40
  10  -3  -1   95.39    4.80
   1  10   3   93.19    4.60
  10  -3  -1  100.09    4.10
   3   1  10   98.89    4.60
  10   3   1   99.99    4.50
 -10  -3   1  103.79    4.10
 -10   3  -1   97.39    4.70
  -1  10  -3  102.89    3.70
  -3  -1  10  101.79    3.90
   1 -10  -3  104.99    4.60
   1 -10  -3   92.69    4.50
  -1 -10   3  106.29    4.80
  -1  10  -3   95.39    3.80
  -3  -1  10   95.79    3.90
   3  -1 -10  103.69    4.60
   3  -1 -10  101.39    3.90
  -1 -10   3   95.79    3.80
  -3  -1  10  100.29    4.50
  10   3   1  105.09    5.00
  -4  -1 -10    0.00    2.20
  10  -4   1    1.20    2.00
  10   4  -1    0.00    2.20
   4  -1  10    0.00    2.30
   4   1 -10    1.30    1.90
   4  -1  10    0.00    1.60
 -10   4   1    0.00    1.80
   1 -10   4    0.00    2.00
   1  10  -4    1.30    1.50
 -10  -4  -1    0.00    1.90
  10  -4   1    1.00    2.10
  10   4  -1    0.00    1.70
  -4   1  10    0.00    1.40
  -1 -10  -4    0.00    2.10
   1  10   4    1.40    2.10
   1 -10  -4    0.00    2.00
   4  -1 -10    0.70    1.60
  -4  -1  10    1.70    1.50
  10  -4  -1    2.90    2.20
  -1  10  -4    0.00    1.20
  -1  10  -4    0.60    1.20
  10   4   1    0.00    2.10
  10   4   1    0.00    1.90
  10  -4  -1    1.20    1.80
  -4  -1  10    0.00    1.70
   4  -1 -10    4.30    2.10
   1 -10  -4    1.20    1.90
  -1 -10   4    0.00    1.20
  -1 -10   4    2.20    2.00
   4   1  10    0.00    1.70
  -4   1 -10    0.00    1.70
 -10  -4   1    0.70    1.80
  -4  -1  10    0.00    1.50
 -10   4  -1    2.80    2.00
  10  -5   1  816.72   19.40
 -10  -5  -1  833.42   19.40
  10   5  -1  837.02   20.10
  10   5  -1  808.22   19.10
   5  -1  10  808.62   19.80
  -1 -10  -5  841.52   19.80
  -5  -1 -10  846.62   19.90
  -5   1  10  832.02   18.60
   5   1 -10  843.72   19.70
   1  10  -5  805.12   18.80
   1 -10   5  829.12   19.70
   5  -1  10  834.62   19.50
  10  -5   1  807.12   19.70
 -10   5   1  821.22   19.20
  -5  -1  10  824.92   18.60
  -1  10  -5  774.12   18.60
  10  -5  -1  833.22   19.90
 -10   5  -1  815.72   19.40
   1 -10  -5  837.42   19.90
   5  -1 -10  815.52   18.60
  10   5   1  830.42   20.10
   5   1  10  826.82   19.70
  -1 -10   5  785.82   18.70
 -10  -5   1  807.82   19.10
  10   5   1  831.12   19.40
   5  -1 -10  832.32   19.80
  10  -5  -1  837.22   19.20
  -1 -10   5  834.82   19.60
  -5  -1  10  799.02   18.60
  -5   1 -10  850.41   19.50
  -1  10  -5  783.12   18.60
   1  10   5  814.82   20.00
   1 -10  -5  849.41   19.70
   1  10  -6  201.58    5.50
  10  -6   1  208.98    6.60
  10   6  -1  223.28    7.30
  -6   1  10  207.68    5.40
   1 -10   6  215.78    6.90
  -6  -1 -10  203.18    7.00
   6   1 -10  215.18    6.90
  10  -6   1  221.98    6.90
   6  -1  10  205.88    6.50
  -1 -10  -6  206.48    6.80
  10   6  -1  211.78    6.40
 -10   6   1  219.28    6.60
   6  -1  10  198.38    7.10
 -10  -6  -1  217.38    6.70
  -6  -1  10  205.38    5.40
   1 -10  -6  198.68    6.90
  -6  -1  10  208.48    5.40
   6  -1 -10  222.38    7.10
 -10  -6   1  212.58    6.50
  10  -6  -1  200.38    6.70
  10  -6  -1  215.88    6.40
   1  10   6  213.18    7.50
  -6   1 -10  206.98    6.60
   1 -10  -6  204.08    6.70
   6  -1 -10  205.38    5.50
   6   1  10  209.38    6.70
  -1 -10   6  196.58    5.40
  -1 -10   6  204.08    6.60
  10   6   1  214.68    7.20
  10  -7   1   13.20    2.30
  10   7  -1   13.30    2.10
   7   1 -10   11.80    2.40
   1 -10   7   13.80    2.40
  10   7  -1   10.40    2.50
  -7  -1 -10   12.70    2.70
  10  -7   1    9.40    2.20
   7  -1  10   14.90    2.10
 -10  -7  -1   15.30    2.30
  -1 -10  -7   11.90    2.40
   7  -1  10   13.50    2.70
  -7   1  10   12.40    1.20
   1  10  -7   10.60    1.30
  10  -7  -1   13.60    2.40
   1 -10  -7   16.10    2.40
   7   1  10   15.20    2.30
 -10  -7   1   12.60    2.20
   7  -1 -10   15.10    2.40
   1 -10  -7   15.10    2.40
  -1 -10   7   15.80    2.40
  10  -7  -1   16.30    2.20
  -7  -1  10   12.40    1.20
  -7   1 -10   11.80    2.10
  10   7   1   14.90    2.70
  -1 -10   7   12.20    1.20
   1 -10   8  217.58    7.10
   8   1 -10  211.08    7.10
  10  -8   1  211.98    6.80
  10   8  -1  225.58    7.40
  10  -8   1  219.18    6.90
 -10  -8  -1  213.48    6.90
  -1 -10  -8  219.78    7.20
   8  -1  10  215.48    7.40
   8  -1  10  218.38    6.80
   1  10  -8  205.38    5.50
   8  -1 -10  217.68    7.40
  10   8   1  230.18    7.70
 -10  -8   1  215.68    6.80
   1 -10  -8  226.88    7.40
   8   1  10  221.28    7.10
  10  -8  -1  227.98    7.20
   1 -10  -8  220.48    7.10
  10  -8  -1  217.48    6.70
  -1 -10   8  220.58    6.90
  -1 -10   8  199.08    5.40
   9   1 -10  119.39    5.30
   9  -1  10   96.79    5.60
  10  -9   1  104.99    4.80
  10   9  -1  104.09    5.50
  -1 -10  -9   96.29    4.80
   9  -1  10  104.29    4.70
   1 -10   9  110.39    5.10
 -10  -9  -1  104.39    5.00
   1  10  -9   91.19    3.10
  10  -9   1  101.69    4.80
  10   9   1  107.29    5.30
   1 -10  -9  104.49    4.90
   1 -10  -9  102.29    5.20
   9  -1 -10  109.99    5.50
 -10  -9   1   98.19    4.50
  10  -9  -1  100.79    4.60
  -1 -10   9  103.49    4.80
   9   1  10   99.29    5.00
  10  -9  -1  103.79    5.10
  10   0   2 3051.19   67.99
  10   0   2 3047.50   68.89
   0  -2 -10 3136.69   68.79
  10   0  -2 3095.69   67.49
   0   2  10 3156.68   68.79
  10   0  -2 3038.50   67.49
   0  -2  10 3017.60   67.89
  -2 -10   0 3141.69   68.29
   2 -10   0 3131.29   68.49
  10   0   2 3157.78   67.99
   2  10   0 3008.60   68.59
   0  -2  10 3062.49   68.29
   0  -2 -10 3094.09   67.89
  -2  10   0 3004.60   68.39
  10   0  -2 3128.39   69.09
  -2 -10   0 3038.30   68.49
   0   2  10 3147.39   67.89
   2 -10   0 3016.60   68.19
   0   2 -10 2932.41   67.89
   0   2 -10 3052.59   68.39
  -1   2  10  595.54   13.90
   2  10  -1  581.64   14.10
  10  -1   2  587.64   14.20
  -1   2  10  586.84   14.40
  -2  10   1  558.64   14.00
  10  -1   2  561.44   14.10
  -1  -2 -10  575.94   14.10
  10  -1   2  573.54   14.40
  10   1  -2  589.64   13.50
  -2 -10  -1  567.34   14.30
   1  -2  10  570.54   14.10
   1   2 -10  576.04   13.90
   1   2 -10  571.54   13.90
  10   1  -2  578.24   14.60
 -10  -1  -2  585.34   14.10
  -2 -10  -1  551.64   14.10
   1  -2  10  571.54   13.80
   2 -10   1  579.54   14.40
  -1  -2 -10  593.94   14.40
   2 -10   1  587.84   13.80
   1  -2 -10  596.74   14.40
   1   2  10  569.64   14.30
  -1  -2  10  565.44   13.90
  -1   2 -10  591.94   14.30
   2 -10  -1  597.84   14.50
  -2  10  -1  575.14   13.80
   1   2  10  587.74   14.10
   2 -10  -1  568.74   14.00
   2  10   1  549.74   14.20
  10  -1  -2  603.64   14.80
  10   1   2  576.04   14.60
  -1   2 -10  560.14   13.80
  -2 -10   1  558.34   14.30
  10  -1  -2  561.24   13.50
  10   1   2  588.24   14.20
  -2 -10   1  541.45   13.90
   1  -2 -10  578.54   13.90
  -1  -2  10  574.74   13.90
 -10  -2  -2  777.52   18.70
 -10   2   2  802.32   18.30
   2   2 -10  769.32   18.50
  10  -2   2  825.72   19.30
   2  10  -2  771.12   18.60
  -2   2  10  806.02   18.50
  10   2  -2  807.02   18.20
  -2  10   2  794.22   18.90
   2 -10   2  796.02   18.40
  -2  -2 -10  801.22   18.90
  10   2  -2  805.22   19.40
  -2 -10  -2  769.82   19.00
   2  -2  10  791.72   18.60
  10  -2   2  779.22   18.80
   2 -10   2  809.82   19.10
   2   2 -10  810.12   18.70
   2  -2  10  791.42   19.00
   2  -2  10  786.72   18.50
   2 -10  -2  778.02   18.90
   2  -2 -10  808.72   19.10
   2  10   2  806.62   19.20
  10  -2  -2  831.12   19.50
 -10   2  -2  789.82   18.80
  -2  -2  10  812.02   18.70
  -2  -2  10  789.12   18.50
   2 -10  -2  814.42   19.00
  10  -2  -2  771.42   18.20
   2  -2 -10  802.42   18.50
  10   2   2  812.32   19.50
  10   2   2  796.32   18.80
 -10  -2   2  798.32   18.20
  -2 -10   2  763.42   18.60
  -2 -10   2  799.52   19.00
   2   2  10  810.92   19.10
   2   2  10  787.52   19.00
  -2  10  -2  766.82   18.40
 -10   3   2   78.39    3.60
  10   3  -2   74.99    4.60
  10   3  -2   83.79    3.70
   2 -10   3   79.59    4.30
   3  -2  10   71.09    3.60
   2 -10   3   82.09    3.20
  -2 -10  -3   71.79    4.20
  10  -3   2   72.99    4.10
  -3  -2 -10   76.89    4.40
  10  -3   2   81.39    4.30
 -10  -3  -2   75.39    4.10
  -2  10   3   84.19    4.40
  -3   2  10   79.79    3.50
   3   2 -10   80.59    3.80
   3  -2  10   76.49    3.60
   3  -2  10   78.49    4.60
   3   2 -10   79.49    3.90
   2  10  -3   77.29    3.70
  -3  -2  10   75.09    3.70
  10  -3  -2   76.89    4.50
  10  -3  -2   75.39    3.60
   3  -2 -10   81.09    3.60
   3  -2 -10   82.29    4.40
   2  10   3   88.29    4.80
  -2 -10   3   71.59    3.50
  -2 -10   3   85.69    4.50
  -3  -2  10   74.39    3.60
 -10  -3   2   77.59    3.50
   2 -10  -3   77.59    4.20
   3   2  10   83.59    4.40
  -2  10  -3   83.19    3.30
  10   3   2   77.29    4.50
  10   3   2   84.69    4.10
   2 -10  -3   78.89    4.10
 -10   3  -2   80.49    4.40
   4  -2  10   24.40    2.80
 -10  -4  -2   27.40    2.60
  10  -4   2   32.60    2.70
   4  -2  10   25.30    2.10
  10  -4   2   26.30    2.60
   4   2 -10   22.80    2.00
  10   4  -2   20.90    2.80
  10   4  -2   26.30    2.10
  -4   2  10   25.90    2.00
  -4  -2 -10   21.80    2.80
  -2 -10  -4   24.30    2.70
   4   2 -10   23.30    2.40
 -10   4   2   27.90    2.30
   2 -10   4   23.50    2.60
   2  10  -4   31.30    2.90
  -2  10  -4   20.60    1.60
  -2 -10   4   26.30    2.70
  10  -4  -2   29.50    2.20
  -4  -2  10   24.90    2.30
   2  10   4   27.30    2.70
  10  -4  -2   27.50    2.80
   4   2  10   29.70    2.60
   4  -2 -10   26.00    2.60
 -10  -4   2   21.90    2.10
   2 -10  -4   29.10    2.70
   2 -10  -4   22.20    2.50
  10   4   2   23.70    2.40
  -4  -2  10   24.50    1.90
  -4   2 -10   27.00    2.20
  10   4   2   27.50    2.90
  -2 -10   4   24.90    1.80
   4  -2 -10   26.40    2.00
   5  -2  10  253.77    8.10
  10  -5   2  263.37    7.80
  -5   2  10  259.37    6.70
  10   5  -2  260.57    7.20
   5   2 -10  247.98    7.50
 -10  -5  -2  269.67    7.60
   2  10  -5  251.37    6.90
   2 -10   5  238.28    7.60
 -10   5   2  273.87    7.30
  10  -5   2  259.27    7.60
  10   5  -2  261.77    8.10
  -2 -10  -5  264.37    7.90
   5  -2  10  264.07    7.30
   5   2 -10  250.97    6.70
  -5  -2 -10  257.37    8.00
  -2  10  -5  239.68    6.40
  10  -5  -2  267.87    7.20
   2 -10  -5  262.57    8.00
  -5  -2  10  249.38    6.60
  10  -5  -2  258.07    7.90
   5   2  10  271.57    7.90
  10   5   2  264.57    8.20
 -10  -5   2  262.77    7.20
  -2 -10   5  247.58    6.70
  -2 -10   5  267.87    7.70
   2 -10  -5  264.77    7.80
   2  10   5  248.28    8.00
   5  -2 -10  262.57    7.80
  -5  -2  10  263.07    7.60
   5  -2 -10  253.17    6.70
  -5   2 -10  261.17    7.30
  -2  10  -5  243.38    6.30
  10  -6   2  411.86   10.70
   6  -2  10  396.86   10.40
   2 -10   6  408.56   10.90
  10  -6   2  408.86   10.80
   2  10  -6  387.36    9.80
 -10  -6  -2  396.16   10.70
  -6  -2 -10  421.96   11.20
  -6   2  10  400.26    9.60
 -10   6   2  409.86   10.40
  10   6  -2  398.46   10.20
   6   2 -10  407.56   10.80
   6   2 -10  385.86    9.60
  10   6  -2  414.66   11.30
  -2 -10  -6  412.06   11.00
   6  -2  10  407.66   11.30
   2 -10  -6  411.06   10.80
 -10  -6   2  398.16   10.20
   2  10   6  413.26   11.30
  -2 -10   6  386.16    9.80
   2 -10  -6  414.86   11.10
   6  -2 -10  400.16   10.90
  -6  -2  10  393.96    9.60
   6  -2 -10  401.46    9.60
  10  -6  -2  420.16   11.10
   6   2  10  418.46   11.00
  -6   2 -10  401.76   10.50
  10  -6  -2  415.16   10.30
  -2 -10   6  402.96   10.70
  10   6   2  404.76   11.30
  -2 -10  -7   25.50    2.80
  -7  -2 -10   25.00    2.90
  10   7  -2   25.30    2.30
   2 -10   7   22.60    2.70
 -10   7   2   26.30    2.50
   7   2 -10   24.30    2.70
   7  -2  10   27.30    3.10
   2  10  -7   23.20    1.80
  10  -7   2   30.50    2.70
  10   7  -2   23.80    2.90
  10  -7   2   29.00    2.70
   7  -2  10   27.50    2.30
 -10  -7  -2   31.70    2.70
   7   2 -10   30.40    2.20
  -7   2  10   32.70    2.00
   2  10   7   28.50    2.90
  -7  -2  10   21.50    1.90
  -7   2 -10   28.80    2.50
  -2 -10   7   27.20    2.70
   2 -10  -7   30.00    2.80
 -10  -7   2   28.80    2.40
  10  -7  -2   27.50    2.40
  10   7   2   24.40    2.90
   7  -2 -10   26.40    2.80
   7  -2 -10   26.90    2.10
   2 -10  -7   28.30    2.80
  10  -7  -2   28.40    2.80
  -2 -10   7   25.40    1.60
   7   2  10   28.00    2.70
   8  -2  10   41.20    3.50
   8  -2  10   53.79    3.40
   8   2 -10   44.10    4.00
  10  -8   2   51.59    3.90
   2  10  -8   42.60    2.60
  -2 -10  -8   44.00    3.90
   2 -10   8   44.30    3.80
 -10  -8  -2   36.00    3.00
  10   8  -2   51.59    4.60
  10  -8   2   48.90    3.90
  -8  -2 -10   39.20    3.40
   8  -2 -10   43.70    2.10
  -2 -10   8   42.00    2.50
   8  -2 -10   50.59    4.20
  10   8   2   41.90    3.40
  -2 -10   8   47.70    3.80
   2  10   8   38.40    3.40
  10  -8  -2   48.70    3.90
  10  -8  -2   47.50    3.60
 -10  -8   2   47.90    3.60
   8   2  10   50.09    3.90
  -8   2 -10   45.70    3.70
   2 -10  -8   52.89    4.10
   2 -10  -8   49.60    3.80
  10  -9   2    1.20    2.10
  10  -9   2    1.20    1.90
   9  -2  10    0.00    1.80
   2  10  -9    2.20    1.30
 -10  -9  -2    1.10    2.10
   9  -2  10    1.70    2.40
   9   2 -10    1.90    2.20
  -9  -2 -10    0.70    2.40
  -2 -10  -9    0.00    2.10
   2 -10   9    2.60    2.20
  10   9  -2    1.50    2.40
   9  -2 -10    0.00    2.20
  -2 -10   9    0.90    1.10
   2 -10  -9    0.00    2.00
  10  -9  -2    0.00    1.90
   2  10   9    0.00    2.30
   2 -10  -9    2.70    2.20
  -2 -10   9    2.70    2.00
 -10  -9   2    2.40    2.00
  10   9   2    0.00    2.30
  10  -9  -2    0.10    2.10
   9   2  10    0.00    2.00
   0  -3  10    0.00    1.40
  10   0  -3    0.00    1.40
   3  10   0    1.20    2.00
  10   0   3    0.00    2.20
   0   3 -10    0.00    2.00
  10   0  -3    1.50    2.20
   0  -3 -10    0.00    1.90
   0  -3 -10    0.30    2.00
   0  -3  10    0.00    1.90
   3 -10   0    1.40    2.10
  10   0   3    2.00    2.20
  10   0  -3    0.80    1.40
  10   0   3    0.30    2.00
   3 -10   0    0.10    1.70
  -3 -10   0    0.00    1.70
   0   3  10    0.00    1.70
  -3 -10   0    0.00    2.10
  -3  10   0    0.00    1.70
   0   3 -10    2.40    1.50
  -3  10   1  103.39    4.30
  10   1  -3  104.19    3.60
  -3 -10  -1  104.19    4.70
   3 -10   1   93.89    3.90
  -1  -3 -10   95.79    4.60
  10  -1   3  103.99    4.60
  -1  -3 -10   94.59    4.50
 -10  -1  -3   99.79    4.50
  -1   3  10   99.99    4.10
  -3 -10  -1   95.09    5.00
   3 -10   1  100.49    4.60
   1  -3  10   97.79    3.80
   3  10  -1   92.69    4.30
   1   3 -10   97.69    3.90
  10  -1   3  107.19    4.90
   1   3 -10   96.59    4.40
  10   1  -3   94.09    4.90
   1  -3  10  101.39    4.70
  10  -1   3  101.79    4.90
  -3 -10   1   89.39    4.40
   1   3  10  102.59    4.40
  -3  10  -1   97.99    4.10
   1  -3 -10   99.99    4.30
   3 -10  -1   98.19    4.50
   3 -10  -1  100.09    4.40
  10   1   3  101.49    4.60
   1  -3 -10  103.99    4.60
  -1   3 -10   98.29    3.80
  -3 -10   1   92.89    4.20
  10  -1  -3   89.79    4.80
  10  -1  -3  100.19    3.60
   3  10   1   87.99    4.70
  -1  -3  10  104.09    4.00
  10   1   3   98.69    4.80
  -1  -3  10   87.49    4.20
  -1   3 -10   90.09    4.70
   2  -3  10   80.19    3.40
  -3 -10  -2   75.19    4.30
 -10  -2  -3   84.19    4.40
   3 -10   2   72.89    4.20
   3 -10   2   85.99    3.50
  10   2  -3   77.89    4.60
  -3  10   2   78.69    4.10
 -10   2   3   85.19    3.50
   2  -3  10   75.09    4.30
   3  10  -2   81.79    4.00
   2   3 -10   71.59    3.80
  10   2  -3   83.19    3.30
  10  -2   3   82.39    4.50
  -2  -3 -10   79.59    4.40
   2  -3  10   79.49    3.60
  -2   3  10   83.29    3.90
   2   3 -10   75.59    3.60
  10  -2   3   83.79    4.50
  -2  -3  10   80.99    3.70
  -2  -3  10   69.19    3.60
  -3  10  -2   78.99    3.50
  10   2   3   77.19    4.60
 -10  -2   3   82.69    3.30
   2   3  10   83.39    4.70
   2  -3 -10   74.99    3.80
  -3 -10   2   76.79    4.10
   3 -10  -2   82.59    4.10
   2  -3 -10   85.19    4.50
   3 -10  -2   79.19    4.20
   3  10   2   77.09    4.20
  10  -2  -3   75.39    4.60
  10  -2  -3   77.69    3.30
  -3 -10   2   82.19    4.00
   3  -3  10   10.50    2.40
 -10  -3  -3    8.90    2.30
   3  -3  10   10.00    1.60
  10  -3   3   10.40    2.30
 -10   3   3   10.40    1.70
   3  -3  10    8.90    1.60
  10   3  -3    5.00    1.50
   3 -10   3    8.50    1.50
   3   3 -10    9.20    1.90
   3   3 -10   10.70    1.90
   3 -10   3    5.10    2.20
  10   3  -3    8.90    2.40
  10  -3   3    5.90    2.10
  -3  -3 -10    8.00    2.40
  -3 -10  -3   11.20    2.30
   3  10  -3   11.00    1.90
  -3   3  10    7.40    1.70
  -3  -3  10    6.70    1.70
   3  -3 -10   10.70    2.30
 -10  -3   3    6.20    1.60
  -3 -10   3    8.20    2.30
   3  10   3   14.00    2.40
   3   3  10    7.70    2.10
   3 -10  -3    7.40    2.10
   3  -3 -10    7.90    1.90
  10   3   3   10.00    2.50
  10  -3  -3   10.90    1.70
  -3 -10   3   10.00    1.60
  -3  -3  10    8.70    1.80
  -3  10  -3    8.60    1.50
  10  -3  -3   11.20    2.40
   3 -10  -3   10.20    2.30
   4   3 -10  484.25   12.30
   4   3 -10  489.95   11.80
  10  -4   3  496.95   12.50
  10   4  -3  515.15   13.10
  10   4  -3  484.65   11.70
  -3 -10  -4  480.35   12.60
   3 -10   4  480.65   11.60
  -4   3  10  490.35   11.80
   4  -3  10  488.25   12.00
   3 -10   4  485.25   12.70
 -10   4   3  501.45   11.90
   4  -3  10  492.95   12.80
  -4  -3 -10  493.15   12.80
 -10  -4  -3  496.85   12.50
  10  -4   3  485.75   12.60
   3  10  -4  497.15   12.10
   3 -10  -4  487.85   12.70
  10  -4  -3  494.65   12.90
  -3 -10   4  485.75   12.00
  -3 -10   4  503.75   12.60
  -3  10  -4  461.75   11.60
  10  -4  -3  514.55   11.80
   3 -10  -4  508.95   12.60
   4  -3 -10  506.65   12.80
   4  -3 -10  486.45   11.80
 -10  -4   3  487.05   11.80
   3  10   4  504.15   13.00
  10   4   3  506.35   13.10
  -4  -3  10  490.45   11.70
  -4   3 -10  483.35   12.00
  -4  -3  10  470.25   12.20
   4   3  10  496.15   12.70
  10   5  -3  148.09    6.10
  10   5  -3  143.49    4.90
  10  -5   3  149.39    5.60
  10  -5   3  151.98    5.60
  -3 -10  -5  148.99    5.70
  -5  -3 -10  151.58    5.90
   5  -3  10  145.99    5.90
   5   3 -10  155.08    5.50
   3  10  -5  157.18    5.00
 -10  -5  -3  150.18    5.60
   5  -3  10  144.69    4.90
 -10   5   3  154.38    5.10
   5   3 -10  151.98    4.70
   3 -10   5  152.18    5.90
   3 -10   5  143.59    4.10
  -5   3  10  157.48    4.60
  -5  -3  10  149.49    4.50
   5   3  10  145.19    5.90
  10  -5  -3  153.28    5.80
   3 -10  -5  149.19    5.70
  -3 -10   5  151.88    5.60
  10   5   3  152.38    6.10
  -5  -3  10  150.18    5.50
  -3 -10   5  141.49    4.80
   3 -10  -5  149.88    5.90
  -5   3 -10  149.99    5.20
   3  10   5  149.39    6.00
   5  -3 -10  151.88    5.70
   5  -3 -10  150.18    4.70
  10  -5  -3  157.38    5.00
 -10  -5   3  149.79    4.90
  -3  10  -5  144.99    4.20
  -6   3  10   26.00    2.30
  10  -6   3   23.20    2.70
 -10  -6  -3   23.50    2.60
   3 -10   6   23.40    2.70
  -3 -10  -6   22.40    2.70
   6   3 -10   22.00    1.80
  -6  -3 -10   21.90    2.80
 -10   6   3   23.10    2.20
  10   6  -3   24.60    2.80
  10   6  -3   16.30    2.00
  10  -6   3   24.30    2.50
   6  -3  10   23.70    2.90
   3  10  -6   25.20    2.00
   6   3 -10   23.80    2.50
   6  -3  10   24.90    2.10
  10  -6  -3   22.70    2.20
   3  10   6   26.30    3.00
   6  -3 -10   22.50    2.70
   3 -10  -6   23.70    2.60
  -3 -10   6   18.50    1.70
  10  -6  -3   23.50    2.70
  -3 -10   6   27.20    2.60
   3 -10  -6   20.80    2.60
  -6   3 -10   24.30    2.20
 -10  -6   3   24.40    2.20
   6   3  10   26.10    2.70
  -6  -3  10   24.50    1.70
   6  -3 -10   23.20    1.80
  10   6   3   19.10    2.80
  -7  -3 -10   10.00    2.60
 -10  -7  -3   10.50    2.30
 -10   7   3   10.50    2.00
   7  -3  10   14.40    2.70
  -3 -10  -7    9.20    2.40
   3  10  -7   10.40    1.70
   7   3 -10   10.40    1.40
   7  -3  10    8.50    1.80
  10  -7   3   11.10    2.20
   7   3 -10   10.80    2.30
  10  -7   3   13.80    2.50
  10   7  -3    9.50    2.50
  10   7  -3    9.70    1.90
   3 -10   7   11.40    2.40
  -7   3  10   10.60    1.30
 -10  -7   3   11.20    2.00
   7  -3 -10    9.40    1.40
  10   7   3   13.40    2.60
   3  10   7   16.80    2.70
   7   3  10   12.90    2.30
  -7   3 -10   15.10    2.00
  -3 -10   7    9.80    1.40
  10  -7  -3    8.50    2.00
   3 -10  -7    9.20    2.30
  10  -7  -3   12.20    2.50
   3 -10  -7   10.10    2.40
  -3 -10   7   12.70    2.20
  -7  -3  10   10.00    1.30
   7  -3 -10   11.10    2.40
   8  -3  10   58.89    4.70
   8   3 -10   66.09    4.30
 -10  -8  -3   52.29    3.90
  -8  -3 -10   61.49    4.70
   3 -10   8   63.29    4.20
  10  -8   3   61.59    4.30
  10   8  -3   58.49    4.60
  -3 -10  -8   60.09    4.20
  10   8  -3   61.59    3.70
   8  -3  10   62.49    3.60
   8   3 -10   58.09    2.60
   3  10  -8   58.49    3.10
  10  -8   3   56.99    4.00
  -8   3  10   62.89    2.50
  10  -8  -3   64.89    4.30
  10  -8  -3   59.19    3.80
   3  10   8   61.29    4.60
 -10  -8   3   56.89    3.60
   3 -10  -8   65.39    4.30
  -3 -10   8   57.59    2.90
  -8   3 -10   65.29    3.90
  -8  -3  10   59.99    2.40
  10   8   3   66.69    4.70
   8  -3 -10   61.19    4.40
  -3 -10   8   62.59    4.10
   3 -10  -8   57.19    3.90
   8   3  10   68.09    4.60
   8  -3 -10   63.19    2.60
   9  -3  10   13.80    2.10
  -3 -10  -9   12.60    2.60
  10  -9   3   15.20    2.60
 -10  -9  -3   11.80    2.50
  -9  -3 -10   12.10    2.70
   9  -3  10   12.50    2.70
   9   3 -10   14.00    2.60
  10   9  -3   10.00    2.60
   3 -10   9   14.30    2.60
  10  -9   3   13.30    2.20
   3  10  -9    9.70    1.60
  10  -9  -3   13.40    2.50
  -3 -10   9   10.00    1.40
 -10  -9   3    9.70    2.10
   3  10   9   10.90    2.60
   9   3  10   15.30    2.60
  10   9   3   10.60    2.70
  10  -9  -3   13.90    2.20
   3 -10  -9    9.40    2.40
   3 -10  -9   10.70    2.30
   9  -3 -10   12.60    1.30
   9  -3 -10   12.20    2.50
  -3 -10   9   10.90    2.20
  10   0   4  250.07    7.70
  -4 -10   0  239.08    7.30
  10   0  -4  258.97    7.90
   0   4  10  256.67    7.20
   4 -10   0  255.97    7.10
   4 -10   0  241.58    7.40
   4  10   0  250.77    7.50
   0  -4  10  250.97    6.60
   0   4 -10  241.18    6.50
   0  -4  10  253.97    7.30
   0   4 -10  253.07    7.50
   0  -4 -10  251.37    7.60
   0  -4 -10  247.08    7.40
  10   0   4  252.97    7.80
  10   0  -4  246.88    6.30
  -4 -10   0  245.48    7.50
  10   0  -4  247.08    6.20
  -4  10   0  242.88    7.10
   4  10  -1    1.40    2.00
  10   1  -4    0.00    1.20
 -10  -1  -4    0.90    2.20
  -4 -10  -1    1.50    2.10
   1   4 -10    0.00    1.50
   4 -10   1    0.00    1.60
  -4  10   1    0.60    1.80
  10   1  -4    4.80    2.30
   1  -4  10    2.10    2.00
   1   4 -10    0.20    1.90
  10  -1   4    0.90    2.30
  -1  -4 -10    0.00    1.90
  10  -1   4    0.00    2.00
   1  -4  10    0.00    1.30
  -1  -4 -10    0.00    2.00
   4 -10   1    2.00    2.10
  -1   4  10    1.40    1.80
   4  10   1    0.00    2.00
  -1  -4  10    0.60    1.80
  -4  10  -1    0.00    1.60
  10  -1  -4    0.00    2.10
  -1   4 -10    0.00    1.40
   4 -10  -1    3.00    2.10
  -4 -10   1    0.00    2.00
   4 -10  -1    1.90    1.80
   1  -4 -10    0.90    1.90
   1  -4 -10    0.00    1.90
  10  -1  -4    0.00    1.20
  10   1   4    1.60    2.10
  -4 -10   1    1.20    1.70
  -1  -4  10    2.20    1.40
   4 -10   2   26.90    2.10
   4 -10   2   22.50    2.60
  10   2  -4   29.00    2.40
  -2   4  10   25.60    2.20
  10  -2   4   27.80    2.80
  10   2  -4   29.30    2.90
   2   4 -10   24.90    2.10
  -4  10   2   26.00    2.40
  -2  -4 -10   27.40    2.70
   2  -4  10   28.30    2.70
   2   4 -10   25.30    2.40
   4  10  -2   26.60    2.40
   2  -4  10   26.20    1.80
  10  -2   4   29.10    2.60
 -10  -2  -4   23.30    2.70
   2  -4  10   30.00    2.60
 -10   2   4   32.10    2.50
  -4 -10  -2   25.90    2.70
 -10  -2   4   25.10    1.70
  -4  10  -2   22.30    2.00
  -2  -4  10   25.60    2.00
  -4 -10   2   27.30    2.20
  -4 -10   2   22.70    2.60
   2  -4 -10   26.60    2.70
   4 -10  -2   24.70    2.40
  10  -2  -4   32.30    2.40
   4 -10  -2   28.80    2.70
   2  -4 -10   29.00    2.40
   2   4  10   23.60    2.70
  10  -2  -4   26.90    2.80
  -2  -4  10   23.70    2.20
  10   2   4   24.60    2.80
   4  10   2   26.70    2.70
  -3   4  10  484.95   11.90
   3  -4  10  503.35   12.70
  10   3  -4  485.95   11.50
   4 -10   3  457.25   12.50
 -10  -3  -4  499.45   12.60
  10  -3   4  493.05   12.60
   3   4 -10  490.55   12.00
   4 -10   3  486.65   11.70
   3  -4  10  487.55   11.70
   3  -4  10  498.55   11.70
   3   4 -10  470.85   12.00
 -10   3   4  493.15   11.60
   4  10  -3  480.95   12.20
  -4 -10  -3  504.15   12.60
  -3  -4 -10  498.95   12.60
  10   3  -4  500.85   13.00
  10  -3   4  467.65   12.40
   4  10   3  482.55   12.70
  10  -3  -4  512.05   11.50
  10   3   4  505.25   12.90
   3  -4 -10  496.55   12.00
  -4 -10   3  490.55   12.50
  -4  10  -3  479.55   11.80
  10  -3  -4  498.85   12.90
  -3  -4  10  490.25   11.90
   4 -10  -3  504.25   12.60
   3  -4 -10  474.25   12.70
   4 -10  -3  474.95   12.40
  -4 -10   3  476.55   12.10
   3   4  10  484.75   12.90
 -10  -3   4  487.65   11.50
  -3  -4  10  477.35   12.00
   4 -10   4 3195.38   71.09
  10   4  -4 3144.89   72.19
   4  -4  10 3178.28   71.19
  10  -4   4 3283.17   71.39
  -4   4  10 3206.58   70.59
   4  10  -4 3106.29   71.49
   4  -4  10 3210.88   71.39
   4   4 -10 3174.28   71.59
   4   4 -10 3098.09   70.59
 -10   4   4 3308.77   70.49
  10   4  -4 3227.88   70.39
  -4  -4 -10 3241.88   71.49
 -10  -4  -4 3225.18   71.39
  10  -4   4 3200.38   71.89
  -4 -10  -4 3142.99   71.39
   4 -10   4 3230.98   71.39
  10  -4  -4 3289.27   72.29
   4  -4 -10 3226.08   70.69
  10   4   4 3350.66   72.39
  -4 -10   4 3036.00   71.39
   4   4  10 3203.18   72.09
   4  -4 -10 3300.67   72.29
  -4 -10   4 3233.98   71.19
  10  -4  -4 3306.77   70.49
   4 -10  -4 3143.59   71.99
  -4  -4  10 3240.68   70.59
  -4   4 -10 3226.18   71.29
   4  10   4 3205.68   72.19
   4 -10  -4 3254.97   71.29
 -10  -4   4 3215.18   70.49
  -4  10  -4 3169.98   71.09
  -4  -4  10 3208.78   71.59
  -4 -10  -5   37.30    3.10
   5   4 -10   39.60    3.40
   5   4 -10   42.70    3.00
  10   5  -4   40.40    2.90
  10   5  -4   43.70    4.00
 -10   5   4   38.60    2.90
   5  -4  10   36.40    2.30
   4 -10   5   40.70    2.40
   4 -10   5   37.70    3.10
   4  10  -5   36.70    3.30
  -5  -4 -10   38.30    3.20
  10  -5   4   43.30    3.20
   5  -4  10   40.70    3.30
  -5   4  10   44.80    2.90
  10  -5   4   44.90    3.70
 -10  -5  -4   39.40    3.10
  10  -5  -4   40.70    3.20
  -4 -10   5   37.30    2.90
 -10   5  -4   48.70    3.90
   4 -10  -5   41.40    3.00
   5  -4 -10   38.20    2.90
   4 -10  -5   46.70    4.10
  -5  -4  10   37.10    2.60
  -5  -4  10   41.20    2.80
  -5   4 -10   39.60    2.40
  10   5   4   42.30    3.30
   4  10   5   39.50    3.20
  -4 -10   5   37.20    3.20
   5  -4 -10   45.30    3.90
   5   4  10   41.10    3.20
 -10  -5   4   42.00    2.90
  -4  10  -5   35.20    2.40
  10  -5  -4   41.40    3.00
   6  -4  10   64.09    4.50
 -10  -6  -4   59.99    4.00
   6   4 -10   60.49    3.80
   4  10  -6   63.29    3.60
   6  -4  10   63.39    3.30
   4 -10   6   55.89    4.40
   6   4 -10   64.19    3.10
  10   6  -4   66.09    4.60
  10   6  -4   57.79    3.40
  -6   4  10   58.29    3.00
  -4 -10  -6   56.79    4.10
  -6  -4 -10   64.39    4.30
  10  -6   4   64.59    4.30
   4 -10   6   59.99    2.40
  10  -6   4   66.39    4.00
 -10   6   4   65.29    3.50
 -10   6  -4   57.39    4.20
   6  -4 -10   58.49    4.20
  -6  -4  10   54.49    3.80
  10  -6  -4   61.69    4.60
 -10  -6   4   65.49    3.40
  10   6   4   61.99    4.50
   4  10   6   78.49    5.00
  -4 -10   6   61.29    3.40
  -4 -10   6   76.69    4.30
  10  -6  -4   69.59    3.50
  -6   4 -10   62.79    3.60
   4 -10  -6   66.69    4.20
   4 -10  -6   67.19    4.10
   6   4  10   65.59    4.40
  -4  10  -6   58.39    2.60
  -6  -4  10   60.59    2.80
   6  -4 -10   64.09    3.10
   7   4 -10   60.29    2.90
  -4 -10  -7   52.99    4.30
   7  -4  10   58.69    3.30
 -10   7   4   60.19    3.70
  10   7  -4   55.79    3.50
   7  -4  10   55.69    4.60
   7   4 -10   55.69    3.90
  10   7  -4   62.69    4.50
   4  10  -7   57.29    3.30
  -7   4  10   55.89    2.80
  -7  -4 -10   53.09    4.20
 -10  -7  -4   53.99    4.30
  10  -7   4   59.29    3.90
  10  -7   4   63.09    4.30
   4 -10   7   55.79    4.20
   7  -4 -10   59.19    2.90
  -4 -10   7   57.49    3.20
  -4 -10   7   60.89    3.90
   7  -4 -10   58.89    4.30
 -10   7  -4   59.99    4.10
   4  10   7   61.09    4.70
   4 -10  -7   53.89    4.20
   4 -10  -7   59.09    4.10
  -7  -4  10   58.79    2.70
  -7   4 -10   61.29    3.70
 -10  -7   4   49.60    3.40
  10  -7  -4   66.49    3.50
  10   7   4   52.89    4.80
   7   4  10   58.99    4.20
  10  -7  -4   54.69    4.30
   8  -4  10    3.60    2.40
 -10   8   4    4.80    1.90
   8   4 -10    6.00    1.40
  -8   4  10    5.60    1.30
  10  -8   4    1.90    2.20
  10   8  -4    6.90    2.50
  10   8  -4    6.20    1.80
   8   4 -10    6.40    2.30
 -10  -8  -4    9.90    2.40
   8  -4  10    4.30    1.70
  10  -8   4    6.20    2.00
  -4 -10  -8    6.50    2.30
  -8  -4 -10    5.40    2.40
   4  10  -8    5.20    1.70
   4 -10   8    3.60    2.30
   4 -10  -8    4.30    2.10
 -10   8  -4    4.50    2.10
   8  -4 -10    6.90    2.30
  -8   4 -10    6.10    1.80
   4 -10  -8    6.10    2.30
  10  -8  -4    6.70    1.90
  -4 -10   8    4.20    1.40
   4  10   8    8.30    2.50
   8  -4 -10    5.00    1.40
 -10  -8   4    4.70    1.90
   8   4  10    5.70    2.30
  -4 -10   8    5.80    2.10
  -8  -4  10    6.70    1.20
  10  -8  -4    6.40    2.30
  10   8   4    5.80    2.40
  -4 -10  -9    1.60    2.30
  10   9  -4    0.00    2.20
  -9  -4 -10    0.00    1.40
   4 -10   9    0.00    2.20
   4  10  -9    1.90    1.70
   9  -4  10    0.00    2.40
  -4 -10  -9    0.00    1.20
  10  -9   4    3.30    2.00
  -9  -4 -10    0.00    2.40
   9  -4  10    1.90    1.70
 -10  -9  -4    0.00    2.20
   9   4 -10    0.00    2.30
  -9   4  10    0.00    1.20
  -4  10   9    0.00    1.20
   9   4 -10    1.60    1.20
  -9   4  10    0.00    1.20
  10  -9   4    3.10    2.30
  -9  -4  10    2.30    1.10
   9  -4 -10    5.20    2.30
 -10  -9   4    0.70    1.90
  10   9   4    1.80    2.40
   9   4  10    1.40    2.20
  10  -9  -4    0.90    1.90
   4 -10  -9    0.00    2.20
  10  -9  -4    1.00    2.20
  -4 -10   9    0.40    1.40
 -10   9  -4    1.30    1.90
   9  -4 -10    0.90    1.20
   4 -10  -9    1.00    2.00
  -4 -10   9    0.00    1.90
  -9   4 -10    1.00    1.80
  -9   4 -10    0.00    1.40
  -9   4 -10    0.20    1.30
   4  10   9    0.40    2.30
   0  -5  10    1.40    1.90
   0   5 -10    0.10    1.30
   5 -10   0    0.80    1.70
   5  10   0    0.40    2.10
   0  -5 -10    0.00    1.90
   0  -5 -10    0.00    1.90
  10   0   5    2.00    2.00
   0  -5  10    0.00    1.20
  10   0  -5    0.00    1.10
  10   0   5    0.00    2.30
  -5  10   0    0.00    1.70
  10   0  -5    0.00    2.10
   5 -10   0    0.00    2.00
  -5 -10   0    0.00    2.00
  -1  -5 -10  871.31   20.20
  -1   5  10  835.42   19.40
 -10  -1  -5  841.62   19.90
  -1  -5 -10  813.92   19.60
   5 -10   1  832.32   19.70
   5  10  -1  816.42   19.70
  -5 -10  -1  787.22   19.60
   1  -5  10  843.62   19.60
  10  -1   5  840.52   19.90
  10  -1   5  852.61   19.90
   1   5 -10  807.32   18.90
   5 -10   1  820.42   19.30
  10   1  -5  815.92   20.10
  10   1  -5  822.12   18.40
   1  -5  10  819.02   18.80
   1   5 -10  797.12   19.40
  -5  10   1  799.42   19.50
  -5  10  -1  802.32   19.30
  10   1   5  839.92   20.00
   5 -10  -1  841.42   19.70
   1  -5 -10  817.32   19.40
  10  -1  -5  821.92   18.40
  -1   5 -10  814.72   18.80
  -5 -10   1  840.42   19.70
  -5 -10   1  819.42   19.70
   5 -10  -1  843.22   19.60
   5  10   1  833.92   20.00
   1  -5 -10  832.62   20.00
  10  -1  -5  835.62   20.10
  -1  -5  10  820.12   19.00
  -1  -5  10  793.62   19.30
   5  10  -2  257.97    7.60
  -2  -5 -10  262.07    7.80
   2   5 -10  238.68    6.80
   2  -5  10  263.57    7.80
  10  -2   5  263.57    8.10
   5 -10   2  275.47    8.00
   2  -5  10  254.77    6.60
  10   2  -5  256.97    8.10
  10   2  -5  261.77    6.40
 -10  -2  -5  254.77    7.90
  -5 -10  -2  248.88    7.80
 -10   2   5  262.77    6.50
   2  -5  10  248.98    6.60
   5 -10   2  263.17    7.10
  -2   5  10  263.77    7.30
  10  -2   5  268.67    7.80
   2   5 -10  260.07    7.40
  -5 -10   2  258.47    7.60
  -5 -10   2  258.57    7.80
  10   2   5  256.77    8.00
   2  -5 -10  266.67    7.40
  -2  -5  10  259.57    6.90
 -10  -2   5  258.87    6.40
   5 -10  -2  265.07    7.80
  10  -2  -5  265.37    6.40
  10  -2  -5  263.47    8.10
   5  10   2  253.27    7.90
  -5  10  -2  262.37    7.20
   5 -10  -2  262.67    7.70
   2   5  10  263.77    8.10
  -2  -5  10  256.17    7.20
   2  -5 -10  253.07    7.90
  -3  -5 -10  146.19    5.60
   3  -5  10  148.99    5.80
  10  -3   5  144.29    5.90
  10  -3   5  156.88    5.60
  10   3  -5  152.08    4.30
  -5 -10  -3  157.58    6.00
   5  10  -3  150.38    5.30
   3  -5  10  152.68    4.50
  10   3  -5  151.28    6.00
 -10  -3  -5  153.48    5.90
   3  -5  10  140.89    4.50
 -10   3   5  152.88    4.40
   3   5 -10  141.49    5.00
   5 -10   3  151.68    5.60
   5 -10   3  149.88    4.80
  -3   5  10  150.18    5.10
   3   5 -10  153.28    5.00
   5 -10  -3  154.18    5.60
  -5 -10   3  145.49    5.70
  -3  -5  10  154.58    4.90
 -10  -3   5  153.08    4.30
   5 -10  -3  151.98    5.70
  -3  -5  10  152.18    5.00
  10   3   5  156.78    6.00
   3   5  10  150.68    6.00
  -5  10  -3  141.69    4.80
   5  10   3  147.49    5.90
  10  -3  -5  155.18    6.00
  10  -3  -5  150.48    4.30
  -5 -10   3  148.99    5.40
   3  -5 -10  145.99    5.10
   3  -5 -10  148.09    5.80
   5 -10   4   41.50    2.70
   4  -5  10   34.80    2.60
 -10  -4  -5   45.40    4.00
  -4   5  10   37.90    3.10
   5 -10   4   40.50    3.10
   4   5 -10   41.50    3.30
  -5 -10  -4   45.40    4.10
  -4  -5 -10   39.00    3.20
   4   5 -10   40.00    3.40
  10  -4   5   45.30    3.70
  10  -4   5   40.40    3.20
  10   4  -5   40.00    3.20
   4  -5  10   39.20    3.20
  10   4  -5   45.50    2.60
   5  10  -4   41.50    3.60
 -10   4   5   40.30    2.80
  10   4   5   38.00    3.20
  -5 -10   4   39.60    3.40
   4  -5 -10   39.70    3.30
  -4  -5  10   40.00    3.00
   4  -5 -10   45.60    4.20
  -5 -10   4   40.10    3.00
  10  -4  -5   40.00    3.20
  10  -4  -5   40.30    2.60
   5 -10  -4   50.59    4.00
   5  10   4   38.10    3.20
  -4  -5  10   34.60    3.00
   4   5  10   48.20    4.10
 -10   4  -5   46.70    3.90
  -5  10  -4   40.70    2.90
   5 -10  -4   44.00    3.90
 -10  -4   5   44.70    2.60
  10   5  -5  249.08    7.70
  -5  -5 -10  221.18    7.40
  10  -5   5  229.38    7.10
   5   5 -10  226.98    6.50
   5  -5  10  227.38    7.60
   5 -10   5  223.88    6.00
   5 -10   5  224.78    7.40
  -5   5  10  227.08    6.30
  10   5  -5  226.98    6.20
   5  -5  10  223.78    6.20
 -10  -5  -5  236.68    7.30
  10  -5   5  244.38    7.50
   5   5 -10  220.78    6.80
  -5 -10  -5  229.88    7.40
 -10   5   5  240.78    6.30
   5  10  -5  233.58    6.90
 -10   5  -5  232.68    7.10
  -5  10  -5  224.28    6.10
  -5 -10   5  230.28    7.10
   5   5  10  242.08    7.60
   5  10   5  226.68    7.70
  10  -5  -5  230.28    7.60
  -5   5 -10  227.78    6.40
   5 -10  -5  234.68    7.20
  -5 -10   5  221.18    6.70
   5 -10  -5  232.58    7.40
   5  -5 -10  217.68    7.40
  10   5   5  231.18    7.70
  10  -5  -5  233.18    6.20
  -5  -5  10  242.48    6.90
   5  -5 -10  232.78    6.50
 -10  -5   5  230.18    6.20
  -5  -5  10  230.88    6.30
   5 -10   6   38.30    2.30
   5 -10   6   35.60    3.10
   5  10  -6   39.40    3.40
  -6  -5 -10   39.40    3.30
  10   6  -5   38.50    3.20
 -10   6   5   43.10    3.10
   6   5 -10   38.70    3.60
  10  -6   5   37.50    2.80
  -6   5  10   38.00    2.90
   6  -5  10   36.40    3.30
  10   6  -5   38.70    2.90
 -10  -6  -5   43.90    3.30
   6  -5  10   39.90    2.80
  10  -6   5   38.30    3.20
   6   5 -10   40.90    2.90
  -5 -10  -6   37.20    3.20
   5  10   6   38.10    3.30
  -5 -10   6   39.70    3.10
   6   5  10   50.39    4.40
   5 -10  -6   42.20    3.20
  -6   5 -10   40.60    3.10
   6  -5 -10   33.80    2.90
  10  -6  -5   45.20    3.10
  -5  10  -6   34.80    2.50
 -10  -6   5   41.80    2.90
   5 -10  -6   40.10    3.00
  -5 -10   6   41.60    3.80
  10   6   5   41.90    3.40
  10  -6  -5   41.80    3.30
   6  -5 -10   40.50    3.20
  -6  -5  10   38.20    2.70
  -6  -5  10   42.90    2.70
 -10   6  -5   42.10    3.90
   5 -10   7  521.45   12.20
   5 -10   7  512.55   13.70
  -7  -5 -10  517.35   13.90
  -7   5  10  517.75   12.50
  10   7  -5  544.15   13.90
  10  -7   5  516.65   13.60
   7   5 -10  518.75   13.40
  -5 -10  -7  545.45   13.90
  10   7  -5  512.65   12.80
   7   5 -10  529.95   12.60
 -10  -7  -5  523.15   13.70
   5  10  -7  523.75   13.00
   7  -5  10  519.85   12.80
   7  -5  10  528.45   14.00
 -10   7   5  550.34   13.00
  10  -7   5  523.55   13.20
   7  -5 -10  527.75   12.60
  10  -7  -5  552.04   14.00
  10  -7  -5  551.94   12.90
  -5 -10   7  543.25   13.40
  -5  10  -7  522.45   12.30
   5  10   7  549.05   14.30
 -10   7  -5  527.95   13.30
  -5 -10   7  514.65   12.90
   7  -5 -10  535.75   14.00
  10   7   5  537.45   14.10
   7   5  10  540.55   14.00
  -7  -5  10  547.45   12.50
  -7   5 -10  532.45   13.00
   5 -10  -7  537.05   13.30
 -10  -7   5  531.55   12.80
   5 -10  -7  523.75   13.90
   8   5 -10   41.80    3.70
  10   8  -5   31.20    3.10
  10  -8   5   36.90    3.40
  10  -8   5   36.50    3.20
   8  -5  10   37.70    3.40
  10   8  -5   33.20    2.40
 -10  -8  -5   32.90    3.20
   5  10  -8   34.40    2.50
   5 -10   8   31.90    3.10
   8  -5  10   38.50    3.00
 -10   8   5   38.00    3.40
  -5 -10  -8   35.90    3.20
  -8   5  10   30.00    2.60
   8   5 -10   34.80    2.70
  -8  -5 -10   33.30    3.20
   5 -10  -8   32.60    2.80
   5 -10  -8   40.40    3.30
  10  -8  -5   35.20    3.20
   8  -5 -10   36.30    3.30
   8   5  10   31.40    3.10
 -10   8  -5   37.40    2.80
  10   8   5   34.30    3.30
  -5 -10   8   34.40    3.00
  -8   5 -10   40.40    3.40
  -8  -5  10   36.00    2.40
   5  10   8   39.70    3.40
  10  -8  -5   35.20    3.10
  -5 -10   8   37.40    2.90
 -10  -8   5   42.00    3.30
   8  -5 -10   36.50    2.70
  -9   5  10  484.25   11.50
  10   9  -5  490.75   13.00
  -9  -5 -10  480.05   12.60
  -9   5  10  475.65   14.70
  -9  -5 -10  490.05   13.10
   5  10  -9  475.05   12.10
  -5  10   9  487.95   14.70
  -5 -10  -9  492.65   12.90
 -10  -9  -5  471.15   12.80
   9  -5  10  478.15   13.10
   9  -5  10  465.75   12.10
   5 -10   9  462.45   12.50
  10  -9   5  475.75   12.30
   9   5 -10  485.75   12.80
   9   5 -10  478.65   11.40
   5 -10   9  451.55   12.80
  10  -9   5  494.55   13.00
  -5 -10  -9  466.35   12.90
  -5 -10  -9  486.75   12.60
   5 -10  -9  492.25   12.50
   9  -5 -10  484.45   12.90
  10   9   5  503.65   13.00
  -9  -5  10  498.25   11.40
   5  10   9  489.45   14.60
  -9   5 -10  490.15   12.30
   9  -5 -10  469.75   11.50
  10   9   5  502.85   13.50
 -10   9  -5  497.25   12.50
   5 -10  -9  484.55   13.20
  -9  -5  10  490.75   14.80
   5 -10  -9  480.55   12.90
  10  -9  -5  478.05   13.00
  10  -9  -5  504.95   12.30
  -5 -10   9  485.35   12.30
  -5 -10   9  478.65   12.00
 -10  -9   5  482.35   12.20
   9  -5 -10  487.85   13.20
  -9  -5  10  485.75   13.00
   5  10   9  494.15   13.40
   9   5  10  498.25   13.30
  -9   5 -10  479.85   13.00
   0  -6 -10    0.00    2.00
   0  -6 -10    0.00    1.90
   0   6 -10    1.30    1.20
   6  10   0    3.60    2.20
  -6  10   0    1.10    1.80
   0  -6  10    0.20    1.90
[truncated: 8,135,228 more chars]
